# Supplementary material for: Restricted-Range Fishes and the Conservation of Brazilian Freshwaters
Source: PLoS One. 2010 Jun 30;5(6):e11390. doi: 10.1371/journal.pone.0011390 (PMC2894945; doi:10.1371/journal.pone.0011390)
Supplement: Table S1 — Species occurrence and watershed matrix. Maps and additional data available at http://peixesraros.conservation.org.br. (0.74 MB XLS) [file pone.0011390.s001.xls]

## Sheet: RRFISH
FID_1	ID	GRUPO	FNUM	SSP	LOCALIDADE	DISTRIBUICAO	LOCALIDA_1	FONTE_COORD	TIPO_DIST	FASE_I_TIP	LAT	LONG	LATG	LATM	LATS	NS	LONG_1	LONM	LONS	REG	REVISOR_CO	FASE_II__CORRECAO	DOCUMENTAÇ	REFERENCIA	ESTADO DE CONSERVACAO	CATEGORIA_	BIOMA	AREA (HA)	FEOW	BACIA	IUCN	CRIT	ORDEM MICROBACIA	CODIGO MICROBACIA	PROTECAO(%)	REMANESCENTE(%)	NOME AREA
593	486	Ancistrinae	137	Ancistrus verecundus Fisch-Muller, Cardoso, Silva, Bertaco, 2005	Igarapé Piracolina, 12°43'33"S 60°11'34''W, cerca de 8 km a oeste de Vilhena, na BR 364, bacia do alto Madeira, Municipio de Vilhena, Estado de Rondônia, Brasil.	Espécie conhecida apenas da localidade-tipo.		Buckup et al 2007	RRT	NAM	-12.7258	-60.1928	12	43	33	s	60	11	34	14	PAB	PAB	Localidade-tipo				Amazonia	87475.1	Madeira Brazilian Shield	AMAZONICA	VU	D2	6	AMA58	0	79	Igarapé Piracolina
734	498	Ancistrinae	137	Lasiancistrus guapore Knaack, 2000	Rio Guaporé.	Espécie conhecida apenas da localidade-tipo.	Rio Guaporé	Fuzzy Gazetteer	RRT	NAM	-15.1851	-59.0128	15	11	7	s	59	0	46	3	OTO	OTO	Localidade-tipo				Amazonia	170949	Guapore - Itenez	AMAZONICA	VU	D2	6	AMA82	3.03921	85	Ribeirão do Machado
478	481	Ancistrinae	137	Ancistrus minutus Fisch-Muller, Mazzoni & Weber, 2001	Córrego Batéias, tributário do alto Tocantins, 13°49'S 48°20'W, Brasil.	Espécie conhecida apenas da localidade-tipo.		Buckup et al 2007	RRT	NAM	-13.8167	-48.3333	13	49	0	s	48	20	0	5	NAM	OTO	Localidade-tipo				CERRADO	134393	Tocantins - Araguaia	TOCANTINS-ARAGUAIA	VU	D2	4	TOAR09	40.3789	100	Alto Rio Tocantins, Serra da Mesa
447	495	Ancistrinae	137	Hemiancistrus votouro Cardoso & Silva, 2004	Arroio Lageado Grande, tributário do rio Passo Fundo, Benjamin Constant, bacia do Uruguai, Estado do Rio Grande do Sul, Brasil.	Espécie conhecida apenas da localidade-tipo.	Arroio Lageado, RS	USBGN	RRT	NAM	-27.4472	-52.6181	27	26	50	s	52	37	5	1	PAB	PAB: Corrigir para 27 26 50 S 52 37 05 W (localidade tipo). Espécie é RR ou RRT.	Localidade-tipo				Atlantic forest	42709.4	Upper Uruguay	URUGUAI	EN	B1a, b i;iii	6	URU09	8.3304	4	Arroio Lajeado Grande
229	16	Anostomidae	104	Leporinus garmani Borodin, 1929	Araçuai.	Rio Jequitinhonha.	Rio Jequitinhonha, Araçuaí	Species link - MZUSP	RR	NAM	-16.56	-41.483	0	0	0		0	0	0	8	PAB	PAB	Localidade-tipo				Atlantic forest	582400	Northeastern Mata Atlantica	ATLANTICO LESTE	VU	B1a, b i;iii	5	ALE15	6.64356	44	Medio Jequitinhonha
49	20	Anostomidae	104	Leporinus pitingai Santos & Jégu, 1996	Rio Pitinga, Cachoeira 40 Ilhas, abaixo UHE Pitinga, Estado do Amazonas, Brasil.	Rio Pitinga, bacia do Uatum╞, Estado do Amazonas.	Rio Pitinga, bacia do Uatum╞, AM	Buckup et al. 2007	RR	NAM	-1.8369	-59.4767	1	50	13	s	59	28	36	12	OTO	OTO	Localidade-tipo				Amazonia	139850	Amazonas Lowlands	AMAZONICA	VU	D2	6	AMA08	36.8856	55	Uatumã/Pitinga
50	23	Anostomidae	104	Leporinus uatumaensis Santos & Jégu, 1996	Rio Uatum╞, cachoeira do Miriti, abaixo da cachoeira Balbina, Estado do Amazonas, Brasil.	Rio Uatum╞.	Rio Uatum╞, cachoeira de Balbina, AM	Buckup et al. 2007	RR	NAM	-1.8369	-59.4767	1	50	13	s	59	28	36	12	OTO	OTO	Localidade-tipo				Amazonia	139850	Amazonas Lowlands	AMAZONICA	VU	D2	6	AMA08	36.8856	55	Uatumã/Pitinga
93	13	Anostomidae	104	Anostomoides passionis Santos & Zuanon, 2006	Rio Xingu, Viracebo do Arros, 3°25'15,7"S 51°55'08,3"W, Estado do Pará, Brasil.	Bacia do Xingu	Rio Xingu, Viracebo do Arros, PA	Buckup et al. 2007	RR	NAM	-3.4211	-51.9189	3	25	16	s	51	55	8	4	NAM	OTO	Bibliográfica.				Amazonia	136125	Xingu	AMAZONICA	EN	B1a, b i;iii	5	AMA33	0	34	Rio Xingu, Altamira
577	17	Anostomidae	104	Leporinus gomesi Garavello & Santos, 1990	Rio Aripuan╞, acima da cachoeira de Dardanelos. Humboldt. Aripuan╞, Estado do Mato Grosso. Brasil.	Rio Aripuan╞. bacia do Amazonas.	Rio Aripuan╞, acima de Dardanelos, MT	Species link - MZUSP	RR	NAM	-10.16	-59.45	0	0	0		0	0	0	14	PAB	PAB	Localidade-tipo				Amazonia	64206.5	Madeira Brazilian Shield	AMAZONICA	EN	B1a, b i;iii	6	AMA49	0	45	Cachoeira de Dardanelos, Rio Aripuanã
431	26	Anostomidae	104	Sartor tucuruiense Santos & Jégu, 1987	Rio Tocantins, Tucurul, Estado do Pará, Brasil.	Bacia do Tocantins.	Tucurui	Species link MZUSP 38579	RR	NAM	-3.7666	-49.6833	0	0	0		0	0	0	4	NAM	OTO	Localidade-tipo		Estado de Conservaç╞o: Criticamente em perigo.	Categoria de ameaça em listas regionais: Criticame	Amazonia	33840.1	Amazonas Estuary & Coastal Drainages	TOCANTINS-ARAGUAIA	EN	B1a, b i;iii	4	TOAR04	8.15916	25	Rio Tocantins, Tucuruí
327	604	Apteronotidae	149	Sternarchorhynchus britskii Campos-da-Paz, 2000	Rio Paraná na represa de Ilha Solteira, 20°30'S 51°00'W, Brasil.	Bacia do alto Paraná.	Rio Parana, em Ilha Solteira, SP	ARCMAP	RR	NAM	-20.4148	-51.3756	20	24	53	s	51	22	32	3	OTO	OTO	Localidade-tipo		Estado de Conservaç╞o: Vulnerável.		Atlantic forest	27142.9	Upper Parana	PARANA	EN	B1a, b i;iii	5	PRN46	0	27	Rio Paraná em Ilha Solteira
328	608	Apteronotidae	149	Tembeassu marauna Triques, 1998	Ilha Solteira, rio Paraná, Estado do Mato Grosso do Sul, Brasil.	Bacia do Paraná.	Rio Parana, em Ilha Solteira, SP	ARCMAP	RR	NAM	-20.4148	-51.3756	20	24	53	s	51	22	32	3	OTO	OTO	Localidade-tipo	Triques (1998).			Atlantic forest	27142.9	Upper Parana	PARANA	EN	B1a, b i;iii	5	PRN46	0	27	Rio Paraná em Ilha Solteira
480	607	Apteronotidae	149	Sternarchorhynchus mesensis Campos-da-Paz, 2000	Rio Tocantins em MinaçulUruaçu, 13°50'S 48°19'W, Estado de Goiás, Brasil.	Bacia do Tocantins.	Rio Tocantins em Minaçu/Uruaçu, GO	Buckup et al. 2007	RR	NAM	-13.8333	-48.3167	13	50	0	s	48	19	0	5	NAM	OTO	Localidade-tipo				CERRADO	134393	Tocantins - Araguaia	TOCANTINS-ARAGUAIA	VU	D2	4	TOAR09	40.3789	100	Alto Rio Tocantins, Serra da Mesa
258	583	Auchenipteridae	141	Pseudauchenipterus jequitinhonhae Steindachner, 1876	Rio Jequitinhonha e rio Canavieiras, Brasil.	Rio Jequitinhonha e rio Canavieiras.	Rio Jequitinhonha em Belmonte, BA	ARCMAP	RR	OTO	-15.8794	-39.1061	15	52	46	s	39	6	22	8	PAB	PAB	Localidade-tipo	Akama (1999).			Atlantic forest	305381	Northeastern Mata Atlantica	ATLANTICO LESTE	EN	B1a, b i;iii	6	ALE31	0.34151	19	Foz do Jequitinhonha
169	578	Auchenipteridae	141	Glanidium albescens Lütken, 1874	Rio das Velhas, Estado de Minas Gerais, Brasil.	Espécie conhecida apenas da localidade-tipo.	Rio das velhas, no mun de Lagoa Santa	USBGN e ARCMAP	RRT	NAM	-19.5776	-43.8844	19	34	40	s	43	53	4	8	PAB	PAB	Localidade-tipo	Lütken (2001).			CERRADO	514066	S. Francisco	S├O FRANCISCO	VU	D2	6	SFR15	7.9215	84	Rio das Velhas em Lagoa Santa
344	46	Bryconinae	111	Brycon insignis Steindachner, 1877	Rio Paraiba do Sul em Campos e Mendes.	Bacia do Paraiba do Sul.	Rio Paraiba do Sul a Montante de Campos, RJ	ARCMAP	RR	OTO	-21.6944	-41.4372	21	41	40	s	41	26	14	8	PAB	PAB	Localidade-tipo	Lima (2001).	Estado de Conservaç╞o: Criticamente em perigo.	Categoria de ameaça em listas regionais: Provavelm	Atlantic forest	61350.3	Paraiba do Sul	ATLANTICO SUDESTE	EN	B1a, b i;iii	4	ASE09	0.735963	12	Rio Paraíba do Sul, em Campos
731	324	Callichthyidae	134	Corydoras guapore Knaack, 1961	Alto rio Guaporé, Estado de Rondônia, Brasil.	Bacia do Guaporé.	Alto rio Guaporé, RO	Buckup et al. 2007	RR	NAM	-15.1851	-59.0128	15	11	7	s	59	0	46	3	OTO	OTO	Localidade-tipo	Knaack (1961), Nijssen & Isbrücker (1980b).			Amazonia	170949	Guapore - Itenez	AMAZONICA	VU	D2	6	AMA82	3.03921	85	Ribeirão do Machado
732	327	Callichthyidae	134	Corydoras sarareensis Dinkelmeyer, 1995	Rio Sararé, afluente do rio Guaporé, Estado do Mato Grosso, Brasil.	Bacia do Guaporé.	Rio Sararé, afl, rio Guaporé, MT	Buckup et al. 2007	RR	NAM	-15.1851	-59.0128	15	11	7	s	59	0	46	3	OTO	OTO	Localidade-tipo	Dinkelmeyer (1995).			Amazonia	170949	Guapore - Itenez	AMAZONICA	VU	D2	6	AMA82	3.03921	85	Ribeirão do Machado
733	328	Callichthyidae	134	Corydoras spectabilis Knaack, 1999	Vila Bela, alto rio Guaporé, Estado do Mato Grosso, Brasil.	Bacia do Guaporé.	Vila bela, alto rio Guaporé, MT	Buckup et al. 2007	RR	NAM	-15.1851	-59.0128	15	11	7	s	59	0	46	3	OTO	OTO	Localidade-tipo	Knaack (1999).			Amazonia	170949	Guapore - Itenez	AMAZONICA	VU	D2	6	AMA82	3.03921	85	Ribeirão do Machado
746	212	Cetopsidae	131	Cetopsidium ferreirai Vari, Ferraris & de Pinna, 2005	Rio Mapuera, bacia do Trombetas, éltima cachoeira antes do rio Trombetas, aproximadamente 1005'S 57°01'W, Estado do Pará, Brasil.	Bacia do Trombetas.	Rio Mapuera, bacia do rio Trombetas, PA	Buuckup et al. 2007	RR	NAM	-1.0833	-57.0167	1	5	0	s	57	1	0	12	OTO	OTO	Localidade-tipo				Amazonia	15087.4	Amazonas Lowlands	AMAZONICA	VU	D2	5	AMA122	89.3209	81	Rio Trombetas, na região da Cachoeira Vira-Mundo
479	213	Cetopsidae	131	Cetopsis caiapo Vari, Ferraris & de Pinna, 2005	Rio Tocantins, Minaçu Cavalcanti (local da usina UHE Serra da Mesa), Estado de Goiás, Brasil.	Espécie conhecida apenas da localidade-tipo.	Montante Barragem UHE, habitat loc tipo alterado pela represa	Vari, Ferraris & de Pinna, 20	RR	NAM	-13.8333	-48.3167	13	50	0	s	48	19	0	5	NAM	OTO	Localidade-tipo				CERRADO	134393	Tocantins - Araguaia	TOCANTINS-ARAGUAIA	VU	D2	4	TOAR09	40.3789	100	Alto Rio Tocantins, Serra da Mesa
725	215	Cetopsidae	131	Cetopsis sarcodes Vari, Ferraris & de Pinna, 2005	Rio Tocantins entre a UHE Cana Brava e a ilha do Orgulho, MinaçulCavalcanti, Estado de Goiás, Brasil.	Espécie conhecida apenas da localidade-tipo.	Jusante Barragem Cana Brava	Arcmap	RRT	NAM	-13.3833	-48.1333	13	23	0	s	48	8	0	5	NAM	OTO	Localidade-tipo				CERRADO	17709.4	Tocantins - Araguaia	TOCANTINS-ARAGUAIA	VU	D2	5	TOAR62	0.0941896	100	Rio Tocantins, afluente margem direita apos foz Rio do Carmo
32	53	Characinae	111	Charax michaeli Lucena, 1989	Igarapé do Cujobim, rio Branco, Brasil.	Bacia do Amazonas.	Igarapé do Cujobim, rio Branco	Species link - MZUSP	RR	NAM	1.8333	-61.1333	1	50	0	n	61	8	0	12	OTO	NAM	Localidade-tipo				Amazonia	43315.5	Amazonas Guiana Shield	AMAZONICA	VU	D2	6	AMA101	0	79	Igarapé Cujobim
47	805	Cichlidae	387	Apistogramma salpinction Kullander & Ferreira, 2005	Banhado no Km 70 da BR-163, bacia do Trombetas, Estado do Pará, Brasil.	Espécie conhecida apenas da localidade-tipo.	Igarapé Caxipacoré (caxipacoró), Kullander e Ferreira 2005	USBGN	RRT	NAM	-0.5833	-56.8333	0	35	0	s	56	50	0	12	OTO	OTO	Localidade-tipo				Amazonia	16653.1	Amazonas Guiana Shield	AMAZONICA	VU	D2	5	AMA114	100	91	Igarapé Caxipacoré, no Trombetas
745	791	Cichlidae	387	Apistogramma angayuara Kullander & Ferreira, 2005	Poço estagnado a jusante da cachoeira Vira Mundo, margem direita do rio Trombetas, Estado do Pará, Brasil.	Rio Trombetas na regi╞o das cachoeiras Porteira e Vira Mundo.	Rio Mapuera, bacia do rio Trombetas, PA	Buuckup et al. 2007	RR	NAM	-1.0833	-57.0167	1	5	0	s	57	1	0	12	OTO	OTO	Localidade-tipo				Amazonia	15087.4	Amazonas Lowlands	AMAZONICA	VU	D2	5	AMA122	89.3209	81	Rio Trombetas, na região da Cachoeira Vira-Mundo
747	808	Cichlidae	387	Cichla thyrorus Kullander & Ferreira, 2006	Igarapé Caxiporé, Estado do Pará, Brasil.	Bacia do Trombetas a montante da Cachoeira Porteira.	Cachoeira porteira, no Trombetas, PA	USBGN e ARCMAP	RR	OTO	-1.0833	-57.0333	1	5	0	s	57	2	0	12	OTO	OTO	Localidade-tipo				Amazonia	15087.4	Amazonas Lowlands	AMAZONICA	VU	D2	5	AMA122	89.3209	81	Rio Trombetas, na região da Cachoeira Vira-Mundo
94	839	Cichlidae	387	Teleocichla centisquama Zuanon & Sazima, 2002	Rio Xingu, furo do Zé Pinheiro, 3°27'26"S 51°55'03"W, Estado do Pará, Brasil.	Cachoeiras do rio Xingu na regi╞o de Altamira.		Buckup et al 2007	RR	NAM	-3.4572	-51.9175	3	27	26	s	51	55	3	4	NAM	OTO	Localidade-tipo				Amazonia	136125	Xingu	AMAZONICA	EN	B1a, b i;iii	5	AMA33	0	34	Rio Xingu, Altamira
580	788	Cichlidae	387	Aequidens gerciliae Kullander, 1995	Igarapé do Aeroporto, Nécleo Aripuan╞, acima da cachoeira, aprox. 10010'S 59°25'W, Estado do Mato Grosso, Brasil.	Drenagem do Aripuan╞, na bacia do Tapajós.	Igarapé do Aeroporto, Aripuan╞, MT	Buckup et al. 2007	RR	NAM	-10.1667	-59.4167	10	10	0	s	59	25	0	14	PAB	PAB	Localidade-tipo				Amazonia	64206.5	Madeira Brazilian Shield	AMAZONICA	EN	B1a, b i;iii	6	AMA49	0	45	Cachoeira de Dardanelos, Rio Aripuanã
581	816	Cichlidae	387	Crenicichla isbrueckeri Ploeg, 1991	Rio Aripuana, Humboldt, 10°10'S 59°27'W, a 3 km da cachoeira de Dardanelos, bacia do Madeira, Estado de Mato Grosso, Brasil.	Bacia do Aripuan╞.		Buckup et al 2007	RR	NAM	-10.1667	-59.45	10	10	0	s	59	27	0	14	PAB	PAB	Localidade-tipo				Amazonia	64206.5	Madeira Brazilian Shield	AMAZONICA	EN	B1a, b i;iii	6	AMA49	0	45	Cachoeira de Dardanelos, Rio Aripuanã
735	832	Cichlidae	387	Geophagus megasema Heckel, 1840	Grande lago em Juquiá, bacia do Guaporé, Estado do Mato Grosso, Brasil.	Espécie conhecida apenas da localidade-tipo.	Alto Guaporé, MT (localidade Imprecisa)	ARcmap	RRT	NAM	-15.1851	-59.0128	15	11	7	s	59	0	46	3	OTO	OTO	Localidade-tipo				Amazonia	170949	Guapore - Itenez	AMAZONICA	VU	D2	6	AMA82	3.03921	85	Ribeirão do Machado
402	815	Cichlidae	387	Crenicichla iguapina Kullander & Lucena, 2006	Rio Betari, Iporanga, drenagem do Ribeira de Iguape, Estado de S╞o Paulo, Brasil.	Bacia do Ribeira de Iguape.	Rio Betari SP	USBGN	RR	NAM	-24.6	-48.6	24	36	0	s	48	36	0	2	OTO	OTO	Localidade-tipo				Atlantic forest	58350	Ribeira de Iguape	ATLANTICO SUDESTE	VU	D2	5	ASE25	62.2441	95	Rio Iporanga
403	830	Cichlidae	387	Geophagus iporangensis Haseman, 1911	Riacho em Iporanga, bacia do Ribeira de Iguape, Estado de S╞o Paulo, Brasíl.	Espécie conhecida apenas da localidade-tipo.	Rio Iporanga	USBGN	RRT	NAM	-24.6	-48.5667	24	36	0	s	48	34	0	2	OTO	OTO	Localidade-tipo				Atlantic forest	58350	Ribeira de Iguape	ATLANTICO SUDESTE	VU	D2	5	ASE25	62.2441	95	Rio Iporanga
770	834	Cichlidae	387	Gymnogeophagus labiatus (Hensel, 1870)	Rio Santa Maria, Taquara, Estado do Rio Grande do Sul, Brasil.	Rio Santa Maria e afluentes, Brasil.	Medio Rio Santa Maria	ARCMAP	RR	OTO	-29.6458	-50.8025	29	38	45	s	50	48	9	1	PAB	PAB: Corrigir para 29 38 45 s 50 48 09 w (rio Paranhama próximo W869a Taquara)+W809	Localidade-tipo	Reis & Malabarba (1988).			Atlantic forest	51603	Laguna dos Patos	ATLANTICO SUL	EN	B1a, b i;iii	5	ASU24	0	57	Rio Santa Maria
333	812	Cichlidae	387	Crenicichla haroldoi Luengo & Britski, 1974	Rio Paraná, em frente a Jupiá, Estado de Mato Grosso, Brasil.	Bacia do alto Paraná.	Rio Paraná em Jupiá, Tres Lagoas, MS	USBGN e ARCMAP	RR	OTO	-20.7647	-51.6433	20	45	53	s	51	38	36	3	OTO	OTO	Localidade-tipo				Atlantic forest	221075	Upper Parana	PARANA	EN	B1a, b i;iii	4	PRN51	0	11	Rio Paraná em Tres Lagoas
378	857	Cichlidae	387	Gymnogeophagus setequedas Reis & Malabarba, 1988	Rio Paraná, Alto Paraná, Paraguai.	Rio Paraná e afluentes, Paraguai e Brasil.	MCP 22532		RR	OTO	-25.5639	-53.4086	25	33	50	s	53	24	31	0		PAB: 25 33 50 s 53 34 31 w (MCP 22532)	Lote de referência (MZUSP 42715).		Estado de Conservaç╞o: Vulnerável.	Categoria de ameaça em listas regionais: Vuineráve	Atlantic forest	22943.8	Iguassu	PARANA	EN	B1a, b i;iii	6	PRN62	0	1	Rio Iguaçu em Nova Prata do Iguaçu
430	841	Cichlidae	387	Teleocichla cinderella Kullander, 1988	Rio T ocantins, a jusante da represa de Tucurui, Estado do Pará, Brasil.	Rio Tocantins a jusante da represa de Tucurui.		Arcmap	RR	NAM	-3.6119	-49.6444	3	36	43	s	49	38	40	4	NAM	OTO	Localidade-tipo		Estado de Conservaç╞o: Criticamente em perigo.	Categoria de ameaça em listas regionais: Criticame	Amazonia	33840.1	Amazonas Estuary & Coastal Drainages	TOCANTINS-ARAGUAIA	EN	B1a, b i;iii	4	TOAR04	8.15916	25	Rio Tocantins, Tucuruí
448	814	Cichlidae	387	Crenicichla igara Lucena & Kullander, 1992	Rio Canoas em Passo do Canoas (estrada SC-458), Estado de Santa Catarina, Brasil.	Rio Canoas, bacia do Uruguai, Uruguai e Brasil.	Rio Canoas, SC, médio curso	ARCMAP	RR	OTO	-27.5964	-51.3972	27	35	47	s	51	23	50	1	PAB	PAB: Corrigir para 27 35 47 s 51 23 50 w (ponte da SC-458 no Canoas)	Localidade-tipo				Atlantic forest	59634.4	Upper Uruguay	URUGUAI	EN	B1a, b i;iii	4	URU10	0	29	Medio Rio Canoas
334	32	Crenuchidae	107	Characidium lauroi Travassos, 1949	Rio das Pedras, Fazenda Penedo, Agulhas Negras (Rezende), Estado do Rio de Janeiro, Brasil.	Bacia do Paraiba do Sul.	Pico das Agulhas Negras	USBGN	RR	PAB	-22.4244	-44.5356	22	25	28	s	44	32	8	9	OTO	PAB: Corrigir para 22 25 28 S 44 32 08 W (Vale de Penedo)	Localidade-tipo			Categoria de ameaça em listas regionais: Vulneráve	Atlantic forest	514929	Paraiba do Sul	ATLANTICO SUDESTE	VU	B1a, b i;iii	5	ASE08	15.3248	43	Rio Paraiba do Sul
254	510	Delturinae	137	Delturus brevis (Reis & Pereira, 2006)	Rio Araçuai, tributário do rio Jequitinhonha, Araçuai, Estado de Minas Gerais, Brasil.	Bacia do alto Jequitinhonha.	Rio Araçuai	USBGN	RR	NAM	-16.7667	-42.0333	16	46	0	s	42	2	0	8	PAB	PAB	Localidade-tipo				Atlantic forest	96947	Northeastern Mata Atlantica	ATLANTICO LESTE	EN	B1a, b i;iii	5	ALE28	0	47	Rio Araçuaí
168	573	Doradidae	140	Franciscodoras marmoratus (Reinhardt, 1874)	Rio das Velhas, Estado de Minas Gerais, Brasil.	Bacia do S╞o Francisco.	Rio das velhas, no mun de Lagoa Santa	USBGN e ARCMAP	RR	NAM	-19.5776	-43.8844	19	34	40	s	43	53	4	8	PAB	PAB	Localidade-tipo	Higuchi (1992),			CERRADO	514066	S. Francisco	S├O FRANCISCO	VU	D2	6	SFR15	7.9215	84	Rio das Velhas em Lagoa Santa
244	210	Erythrinidae	129	Hoplias brasiliensis (Spix «in» Spix & Agassiz, 1829)	Rio Paraguaçu, Estado da Bahia, Brasil.	Bacia do Paraguaçu, Estado da Bahia.	Rio Paraguaçu, médio curso	ARCMAP	RR	OTO	-12.59	-38.9836	12	35	24	s	38	59	1	6	NAM	OTO	Localidade-tipo	Oyakawa (1990).			Atlantic forest	109273	Northeastern Mata Atlantica	ATLANTICO LESTE	EN	B1a, b i;iii	4	ALE22	16.4537	70	Medio Paraguaçu
740	295	Glanapteryginae	134	Typhlobelus macromycterus Costa & Bockmann, 1994	Rio Tocantins próximo a Tucurui, Estado do Pará, Brasil.	Rio Tocantins.	Rio Tocantins, próximo a Tucuruí, PA	Buckup et al. 2007	RR	NAM	-4.4956	-49.5089	4	29	44	s	49	30	32	4	NAM	OTO	Localidade-tipo				Amazonia	23596	Tocantins - Araguaia	TOCANTINS-ARAGUAIA	VU	D2	4	TOAR69	71.6431	67	Afluente do Rio Tocantins, em Tucurui
267	64	Glandulocaudinae	111	Lophiobrycon weitzmani Castro, Ribeiro, Benine & Melo, 2003	Córrego Bom Jesus (bacia do Grande), 20°12'10"S 46°55'22"W, Estância Carmen Silvia, Município de Delfinópolis, Estado de Minas Gerais, Brasil.	Espécie conhecida apenas da localidade-tipo.		Buckup et al 2007	RRT	NAM	-20.2028	-46.9228	20	12	10	s	46	55	22	5	NAM	OTO	Localidade-tipo				CERRADO	72306.1	Upper Parana	PARANA	VU	D2	5	PRN04	5.76324	63	Bacia do Rio Grande em Delfinópolis
255	553	Heptapteridae	138	Rhamdia jequitinhonha Silfvergrip, 1996	Rio Araçuai, Santa Rita, Estado de Minas Gerais, Brasil.	Espécie conhecida apenas da localidade-tipo.	Rio arassuaí, MG	USBGN	RRT	NAM	-16.7667	-42.0333	16	46	0	s	42	2	0	8	PAB	PAB	Localidade-tipo		Estado de Conservaç╞o: Vulnerável.		Atlantic forest	96947	Northeastern Mata Atlantica	ATLANTICO LESTE	EN	B1a, b i;iii	5	ALE28	0	47	Rio Araçuaí
355	538	Heptapteridae	138	Pimelodella eigenmanni (Boulenger, 1891)	Macacos, Brasil.	Bacia do Paraíba do Sul.	Maior drenagem em Paulo de Frontin, RJ. Ver Rio dos macacos em Pseudotothyris janeirensis	ARCMAP	RR	OTO	-22.5764	-43.6847	22	34	35	s	43	41	5	8	PAB	PAB: Corrigir para 22 34 35 s 43 41 05 w (rio dos Macacos)	Localidade-tipo	Eigenmann (1917a).			Atlantic forest	43759.5	Paraiba do Sul	ATLANTICO SUDESTE	EN	B1a, b i;iii	5	ASE16	0	61	Rio dos Macacos, bacia do RIo Guandu
392	540	Heptapteridae	138	Pimelodella kronei (Miranda Ribeiro, 1907)	Iguape, em águas das cavernas do Iporanga, também no Estado de S╞o Paulo, Brasil.	Cavernas na bacia do Ribeira de Iguape, no Estado de S╞o Paulo.	Iporanga	Species Link MZUSP	RR	NAM	-24.5833	-48.5999	0	0	0		0	0	0	2	OTO	OTO	Localidade-tipo	Eigenmann (1917a), Eigenmann (1917a).	Estado de Conservaç╞o: Vulnerável.	Categoria de ameaça em listas regionais: Vulneráve	Atlantic forest	58350	Ribeira de Iguape	ATLANTICO SUDESTE	VU	D2	5	ASE25	62.2441	95	Rio Iporanga
400	544	Heptapteridae	138	Pimelodella transitoria Miranda Ribeiro, 1907	Ribeir╞o do Alambari, Iporanga, Brasil.	Bacia do Ribeira de Iguape.	Rio Betari SP	USBGN	RR	NAM	-24.6	-48.6	24	36	0	s	48	36	0	2	OTO	OTO	Localidade-tipo				Atlantic forest	58350	Ribeira de Iguape	ATLANTICO SUDESTE	VU	D2	5	ASE25	62.2441	95	Rio Iporanga
401	555	Heptapteridae	138	Rhamdioglanis transfasciatus Miranda Ribeiro, 1908	Rio Betari.	Riachos costeiros do Estado do Rio de Janeiro ao Estado de Santa Cata ri na	Rio Betari SP	USBGN	RR	NAM	-24.6	-48.6	24	36	0	s	48	36	0	2	OTO	OTO	Localidade-tipo	Bockmann (1998).			Atlantic forest	58350	Ribeira de Iguape	ATLANTICO SUDESTE	VU	D2	5	ASE25	62.2441	95	Rio Iporanga
165	532	Heptapteridae	138	Imparfinis minutus (Lütken, 1874)	Estado de Minas Gerais próximo à cidade de Lagoa Santa, especialmente no rio das Velhas e afluentes, Brasil.	Alto S╞o Francisco.	Rio das velhas, no mun de Lagoa Santa	USBGN e ARCMAP	RR	NAM	-19.5776	-43.8844	19	34	40	s	43	53	4	8	PAB	PAB	Localidade-tipo	Bockmann (1998), Britski (2001).			CERRADO	514066	S. Francisco	S├O FRANCISCO	VU	D2	6	SFR15	7.9215	84	Rio das Velhas em Lagoa Santa
166	556	Heptapteridae	138	Rhamdiopsis microcephala (Lütken, 1874)	Rio das Velhas, Estado de Minas Gerais, Brasil.	Bacias do alto Paraná e alto S╞o Francisco.	Rio das Velhas no mun de Lagoa Santa.	USBGN e ARCMAP	RRT	OTO	-19.5776	-43.8844	19	34	40	s	43	53	4	8	PAB	PAB: Espécie é RRT	Localidade-tipo	Bockmann (1998), Britski (2001).	Estado de Conservaç╞o: Vulnerável.		CERRADO	514066	S. Francisco	S├O FRANCISCO	VU	D2	6	SFR15	7.9215	84	Rio das Velhas em Lagoa Santa
535	535	Heptapteridae	138	Phenacorhamdia somnians (Mees, 1974)	Sangadina, um tributário do rio das Mortes, 2 km de Xavantina [Nova Xavantina], Estado do Mato Grosso, Brasil.	Bacia do rio das Mortes (afiuente do Araguaia).	afluente do R das Mortes, proximo N Xavantina	Arcmap	RR	NAM	-14.6269	-52.3675	14	37	37	s	52	22	3	3	OTO	OTO	Localidade-tipo	Bockmann (1998), Britski (1993).			CERRADO	172150	Tocantins - Araguaia	TOCANTINS-ARAGUAIA	VU	D2	4	TOAR46	0.0314779	74	Rio das Mortes em Nova Xavantina
578	365	Hypoptopomatinae	136	Parotocinclus aripuanensis Garavello, 1988	Ingazeiro, 20 km acima da foz do Canum╞, Aripuan╞, Estado do Mato Grosso, Brasil.	Bacia do Aripuan╞.	Ingazeiro, 20 km acima da boca do Canuma, rio Aripuana	Species link MZUSP 36899	RR	NAM	-10.1666	-59.45	0	0	0		0	0	0	14	PAB	PAB	Localidade-tipo				Amazonia	64206.5	Madeira Brazilian Shield	AMAZONICA	EN	B1a, b i;iii	6	AMA49	0	45	Cachoeira de Dardanelos, Rio Aripuanã
336	366	Hypoptopomatinae	136	Parotocinclus bidentatus Gauger & Buckup, 2005	Rio Pirapetinga, tributário da margem esquerda do Paraiba do Sul, Municipio de Resende, 22°28'08" 44°26'48"W, Estado do Rio de Janeiro, Brasil.	Bacia do Paraiba do Sul.	Rio Pirapetinga, trib. Paraíba do Sul, RJ	Buckup et al. 2007	RR	NAM	-22.4689	-44.4467	22	28	8	s	44	26	48	9	OTO	OTO	Localidade-tipo				Atlantic forest	514929	Paraiba do Sul	ATLANTICO SUDESTE	VU	B1a, b i;iii	5	ASE08	15.3248	43	Rio Paraiba do Sul
337	379	Hypoptopomatinae	136	Pseudotocinclus parahybae Takako, Oliveira & Oyakawa, 2005	Tributário do ribeir╞o Grande, Fazenda S╞o Sebasti╞o do Ribeir╞o Grande, 22°46'S 45°27'W, bacia do Paraiba do Sul, Municipio de Pindamonhangaba, Estado de S╞o Paulo, Brasil.	Espécie conhecida apenas da localidade-tipo.		Buckup et al 2007	RRT	NAM	-22.7667	-45.45	22	46	0	s	45	27	0	9	OTO	OTO	Localidade-tipo				Atlantic forest	514929	Paraiba do Sul	ATLANTICO SUDESTE	VU	B1a, b i;iii	5	ASE08	15.3248	43	Rio Paraiba do Sul
354	381	Hypoptopomatinae	136	Pseudotothyris janeirensis Britski & Garavello, 1984	Rio dos Macacos, represa Engenho da Serra, Paulo de Frontin, Estado do Rio de Janeiro, Brasil.	Estado do Rio de Janeiro.	Maior drenagem em Paulo de Frontin, RJ	USBGN e ARCMAP	RR	OTO	-22.5764	-43.6847	22	34	35	s	43	41	5	8	PAB	PAB: Corrigir para 22 34 35 s 43 41 05 w (rio dos Macacos)	Localidade-tipo				Atlantic forest	43759.5	Paraiba do Sul	ATLANTICO SUDESTE	EN	B1a, b i;iii	5	ASE16	0	61	Rio dos Macacos, bacia do RIo Guandu
393	355	Hypoptopomatinae	136	Hisonotus leucofrenatus (Miranda Ribeiro, 1908)	Rio das Pedras [bacia do Ribeira de Iguape, BrasilJ.	Bacia do Ribeira de Iguape.	alto Rio Rib do Iguape	Arcmap	RR	NAM	-24.5833	-48.59	24	27	10	s	47	50	10	2	OTO	OTO	Localidade-tipo				Atlantic forest	58350	Ribeira de Iguape	ATLANTICO SUDESTE	VU	D2	5	ASE25	62.2441	95	Rio Iporanga
394	357	Hypoptopomatinae	136	Lampiella gibbosa (Miranda Ribeiro, 1908)	Rio Betari, Estado de S╞o Paulo, Brasil.	Bacia do Ribeira de Iguape.	Rio Betari SP	USBGN	RR	NAM	-24.5833	-48.5949	0	0	0		0	0	0	2	OTO	OTO	Localidade-tipo				Atlantic forest	58350	Ribeira de Iguape	ATLANTICO SUDESTE	VU	D2	5	ASE25	62.2441	95	Rio Iporanga
279	342	Hypoptopomatinae	136	Corumbataia britskii Ferreira & Ribeiro, 2007	Córrego Pedra Azul, 19°12'15"S 52°43'55"W, drenagem do Sucurié, bacia do alto Paraná, Chapad╞o do Sul, Estado do Mato Grosso, Brasil.	Drenagem do Sucurié, na bacia do alto Paraná.		Buckup et al 2007	RR	NAM	-19.2042	-52.7319	19	12	15	s	52	43	55	3	OTO	OTO	Lote de referência.				CERRADO	98269	Upper Parana	PARANA	EN	B1a, b i;iii	6	PRN11	58.9474	9	Córrego Pedra Azul, Rio Sucuriu
338	464	Hypostominae	136	Pareiorhina brachyrhyncha Chamon, Aranda & Buckup, 2005	Ribeir╞o Grande e canal adjacente, bacia do Paraíba do Sul, 22°46'14,1"S 45°26'42,5"W, Fazenda Vera Cruz, Bairro Ribeir╞o Grande, Município de Pindamonhangaba, Estado de S╞o Paulo, Brasil.	Drenagens do ribeir╞o Grande, Guameral e Piagüi, na margem esquerda do rio		Buckup et al 2007	RR	NAM,PAB	-22.7706	-45.4451	22	46	14	s	45	26	43	9	OTO	OTO	Localidade-tipo				Atlantic forest	514929	Paraiba do Sul	ATLANTICO SUDESTE	VU	B1a, b i;iii	5	ASE08	15.3248	43	Rio Paraiba do Sul
339	466	Hypostominae	136	Pareiorhina rudolphi (Miranda Ribeiro, 1911)	Piquete (lorena), Estado de S╞o Paulo, Brasil.	Riachos tributários do Paraíba do Sul, próximo a Lorena no Estado de S╞o Pa	Tributario Paraiba do Sul em Lorena SP	Arcmap	RR	NAM	-22.7904	-45.1052	22	47	26	s	45	6	19	9	OTO	OTO	Localidade-tipo	Gosline (1947), Bockmann & Ribeiro (2003).		Categoria de ameaça em listas regionais: Vulneráve	Atlantic forest	514929	Paraiba do Sul	ATLANTICO SUDESTE	VU	B1a, b i;iii	5	ASE08	15.3248	43	Rio Paraiba do Sul
398	441	Hypostominae	136	Isbrueckerichthys alipionis (Gosline, 1947)	Quase certamente no ribeir╞o do Monjolinho, bacia do Iporanga, Estado de S╞o Paulo, Brasil.	Rio Betari, bacia do Ribeira de Iguape, Estado de S╞o Paulo.	Rio Betari SP	USBGN	RR	NAM	-24.6	-48.6	24	36	0	s	48	36	0	2	OTO	OTO	Localidade-tipo	Pereira & Reis (2002).			Atlantic forest	58350	Ribeira de Iguape	ATLANTICO SUDESTE	VU	D2	5	ASE25	62.2441	95	Rio Iporanga
390	442	Hypostominae	136	Isbrueckerichthys duseni (Miranda Ribeiro, 1907)	Ribeir╞o do Monjolinho, 300m acima do nivel do mar, tributário do rio Betari, I poranga, Estado de S╞o Paulo, Brasil.	Riachos do alto Ribeira de Iguape, no Estado do Paraná.	Alto Betari, em Iporanga SP	Arcmap	RR	NAM	-24.563	-48.6696	24	33	47	s	48	40	11	2	OTO		Localidade-tipo	Pereira & Reis (2002).			Atlantic forest	58350	Ribeira de Iguape	ATLANTICO SUDESTE	VU	D2	5	ASE25	62.2441	95	Rio Iporanga
399	447	Hypostominae	136	Kronichthys subteres Miranda Ribeiro, 1908	Rio Betari, rio Pardo e rio Iporanga, Brasil.	Bacia do Ribeira de Iguape.	Rio Betari SP	USBGN	RR	NAM	-24.6	-48.6	24	36	0	s	48	36	0	2	OTO	OTO	Localidade-tipo				Atlantic forest	58350	Ribeira de Iguape	ATLANTICO SUDESTE	VU	D2	5	ASE25	62.2441	95	Rio Iporanga
422	443	Hypostominae	136	Isbrueckerichthys epakmos Pereira & Oyakawa, 2003	Rio Verde em Piéva, na estrada para Rio Verde, 23°58'22'S 47°34'23"W, bacia do Ribeira de Iguape, Tapirai, Estado de S╞o Paulo, Brasil.	Cabeceiras do Juquiá, bacia do Ribeira de Iguape, Estado de S╞o Paulo.		Buckup et al 2007	RR	NAM	-23.9728	-47.5739	23	58	22	s	47	34	26	2	OTO	OTO	Localidade-tipo				Atlantic forest	66237.9	Ribeira de Iguape	ATLANTICO SUDESTE	VU	D2	5	ASE34	91.712	95	Rio Verde em Tapiraí
718	459	Hypostominae	136	Pareiorhaphis splendens Bizerril, 1995	Rio Cubat╞o, próximo a cidade de Joinville, Estado de Santa Catarina, Brasil.	Drenagens costeiras do Estado de Santa Catarina (rio Cubat╞o Norte, rio Ita	Alto curso do CubaT╞o em joinville	ARCMAP	RR	OTO	-26.1889	-49.0518	26	11	20	s	49	3	6	1	PAB	PAB	Localidade-tipo	Pereira & Reis (2002).			Atlantic forest	50149.9	Southeastern Mata Atlantica	ATLANTICO SUL	EN	B1a, b i;iii	5	ASU11	73.7345	68	Rio Cubatão em Joinville
282	437	Hypostominae	136	Hypostomus variipictus (Ihering, 1911)	Rio Pardo, próximo a Barretos, quase em sua foz no rio Grande, tributário do lado esquerdo do rio Paraná, Estado de S╞o Paulo, Brasil.	Bacia do Grande.	Rio Pardo, em Barretos	Arcmap	RR	NAM	-20.4306	-48.4911	20	25	50	s	48	29	28	5	NAM	OTO	Localidade-tipo				CERRADO	128694	Upper Parana	PARANA	EN	B1a, b i;iii	6	PRN14	0	0	Bacia do Pardo
322	445	Hypostominae	136	Isbruekerichthys saxicola Jerep, Shibatta, Pereira & Oyakawa, 2006	Ribeir╞o Jacutinga, bacia do Tibagi, 23°14'30"S 51°13'05"W, Tibagi, Estado do Paraná, Brasil.	Espécie conhecida apenas da localidade-tipo.		Buckup et al 2007	RRT	NAM	-23.2417	-51.2181	23	14	30	s	51	13	5	3	OTO	OTO	Localidade-tipo				Atlantic forest	256453	Upper Parana	PARANA	EN	B1a, b i;iii	6	PRN42	0.295472	12	Ribeirão Taquari e Rio Tibaji
163	422	Hypostominae	136	Hypostomus lima (Lütken, 1874)	Rio das Velhas, ribeir╞o do Mato e lagoa Santa, Brasil.	Bacia do S╞o Francisco.	Rio das velhas, no mun de Lagoa Santa	USBGN e ARCMAP	RR	NAM	-19.5776	-43.8844	19	34	40	s	43	53	4	8	PAB	PAB	Localidade-tipo	Lütken (1875).			CERRADO	514066	S. Francisco	S├O FRANCISCO	VU	D2	6	SFR15	7.9215	84	Rio das Velhas em Lagoa Santa
164	424	Hypostominae	136	Hypostomus macrops (Eigenmann & Eigenmann, 1888)	Rio das Velhas, Estado de Minas Gerais, Brasil.	Bacia do S╞o Francisco, na drenagem do rio das Velhas.	Rio das velhas, no mun de Lagoa Santa	USBGN e ARCMAP	RR	NAM	-19.5776	-43.8844	19	34	40	s	43	53	4	8	PAB	PAB	Localidade-tipo				CERRADO	514066	S. Francisco	S├O FRANCISCO	VU	D2	6	SFR15	7.9215	84	Rio das Velhas em Lagoa Santa
497	417	Hypostominae	136	Hypostomus ericae Hollanda Carvalho & Weber, 2004	Rio Tocantins, Porto Alfredinho, 14°02'22,1"S 48°31'28,6"W, bacia do Tocantins, Estado de Goiás, Brasil.	Alto Tocantins, Estado de Goiás, Brasil, na regi╞o de influência da barrage		Buckup et al 2007	RR	NAM	-14.0392	-48.5244	14	2	21	s	48	31	28	5	NAM	OTO	Localidade-tipo				CERRADO	56931.1	Tocantins - Araguaia	TOCANTINS-ARAGUAIA	VU	D2	5	TOAR19	0	100	Rio Palmeira
444	467	Hypostominae	136	Pogonopoma obscurum Quevedo & Reis, 2002	Rio Canoas na estrada de Anita Garibaldi para Abdon Batista, aproximadamente 27°39'S 51°05'W, Estado de Santa Catarina, Brasil.	Alto Uruguai no Estado do Rio Grande do Sul e Santa Catarina.		Buckup et al 2007	RR	NAM	-27.65	-51.0833	27	39	0	s	51	5	0	1	PAB	PAB	Localidade-tipo				Atlantic forest	73171.7	Upper Uruguay	URUGUAI	EN	B1a, b i;iii	4	URU06	1.22886	25	Rio Canoas em Anita Garibaldi
582	67	Iguanodectinae	111	Iguanodectes variatus Géry, 1993	Rio Guaporé, 5 km a montante da cachoeiralbarragem de Samuel, bacia do Madeira, Estado de Rondônia, Brasil.	Bacias dos rios Branco, Guaporé, Trombetas e Urubu.	Rio Candeias acima da Barragem de Samuel	ARCMAP	RR	OTO	-8.7556	-63.4097	8	45	20	s	63	24	35	14	PAB	PAB: Corrigir para 8 45 20 s 63 24 35 w (Localidade tipo)	Localidade-tipo				Amazonia	210119	Madeira Brazilian Shield	AMAZONICA	VU	D2	5	AMA50	21.0389	51	Rio Jamari
231	78	Incertae	115	Astyanax brevirhinus Eigenmann, 1908	Rio Jequitinhonha, Brasil.	Bacia do Jequitinhonha.	Rio Jequitinhonha	Buckup et al. 2007	RRT	NAM	-16.6833	-41.3833	16	41	0	s	41	23	0	8	PAB	PAB: A espécies é RRD	Localidade-tipo				Atlantic forest	582400	Northeastern Mata Atlantica	ATLANTICO LESTE	VU	B1a, b i;iii	5	ALE15	6.64356	44	Medio Jequitinhonha
96	80	Incertae	115	Astyanax dnophos Lima & Zuanon, 2004	Rio Xingu, Costa Jénior, 3°29'37"S 52°20'10"W, Altamira, Estado do Pará, Brasil.	Bacia do baixo Xingu, na regi╞o de Altamira.		Buckup et al 2007	RR	NAM	-3.4936	-52.3361	3	29	37	s	52	20	10	4	NAM	OTO	Localidade-tipo				Amazonia	132525	Xingu	AMAZONICA	EN	B1a, b i;iii	5	AMA34	0	46	Rio Xingu, Costa Junior, Altamira
97	191	Incertae	115	Moenkhausia petymbuaba Lima & Birindelli, 2006	Rio Curuá, aproximadamente 8°44'S 54°57W, Serra do Cachimbo, estrada Santarém-Cuaiabá, Estado do Pará, Brasil.	Espécie conhecida apenas da localidade-tipo.		Buckup et al 2007	RRT	NAM	-8.7333	-54.95	8	44	0	s	54	57	0	4	NAM	OTO	Localidade-tipo				Amazonia	119866	Xingu	AMAZONICA	VU	D2	6	AMA35	48.3517	92	Rio Curuá
579	186	Incertae	115	Moenkhausia levidorsa Benine, 2002	Nécleo Aripuan╞, igarapé do Aeroporto, furo Bahia, acima da Cachoeira de Dardanelos, aproximadamente 10°10'S 59°25'W, Estado do Mato Grosso, Brasil.	Espécie conhecida apenas da localidade-tipo.		Buckup et al 2007	RRT	NAM	-10.1667	-59.4167	10	10	0	s	59	25	0	14	PAB	PAB	Localidade-tipo	Benine (2002).			Amazonia	64206.5	Madeira Brazilian Shield	AMAZONICA	EN	B1a, b i;iii	6	AMA49	0	45	Cachoeira de Dardanelos, Rio Aripuanã
586	137	Incertae	115	Hemigrammus melanochrous Fowler, 1913	Afluente do rio Madeira próximo a Porto Velho, Brasil.	Bacia do Madeira.	Afl rio Madeira, perto de Porto Velho, RO	Buckup et al. 2007	RR	NAM	-8.8208	-63.9214	8	49	15	s	63	55	17	14	PAB	PAB: Corrigir para 08 49 15 S 63 55 17 (Proximidades de Porto Velho e Cachoeira do Santo Antônio)	Localidade-tipo				Amazonia	68315.7	Madeira Brazilian Shield	AMAZONICA	VU	D2	6	AMA53	28.8852	57	Rio Madeira, Porto Velho
587	181	Incertae	115	Knodus smithi (Fowler, 1913)	Afluente do rio Madeira próximo a Porto Velho, Estado de Rondônia, Brasil.	Bacia do Madeira.	Afl. Rio Madeira, próximo a Porto Velho, RO	Buckup et al. 2007	RR	NAM	-8.8208	-63.9214	8	49	15	s	63	55	17	14	PAB	PAB: Corrigir para 08 49 15 S 63 55 17 (Proximidades de Porto Velho e Cachoeira do Santo Antônio)	Localidade-tipo	Eigenmann (1918).			Amazonia	68315.7	Madeira Brazilian Shield	AMAZONICA	VU	D2	6	AMA53	28.8852	57	Rio Madeira, Porto Velho
395	104	Incertae	115	Bryconamericus microcephalus (Miranda Ribeiro, 1908)	Rio Betari, afiuente do rio Ribeira, Brasil.	Bacia do Ribeira de Iguape.	Rio Betari SP	USBGN	RR	NAM	-24.6	-48.6	24	36	0	s	48	36	0	2	OTO	OTO	Localidade-tipo	Bizerril & Peres-Neto (1995).			Atlantic forest	58350	Ribeira de Iguape	ATLANTICO SUDESTE	VU	D2	5	ASE25	62.2441	95	Rio Iporanga
454	131	Incertae	115	Deuterodon supparis Lucena & Lucena, 1992	Rio Itajai-Açu, Estado de Santa Catarina, Brasil.	Bacia do Itajal-Açu.	Rio Itajaí-Açu, Santa Catarina	Species link - MZUSP	RR	NAM	-27.0833	-49.5333	0	0	0		0	0	0	1	PAB	CN	Localidade-tipo				Atlantic forest	39700	Southeastern Mata Atlantica	ATLANTICO SUL	EN	B1a, b i;iii	5	ASU03	0	44	Rio Itajaí-açu
268	122	Incertae	115	Creagrutus varii Ribeiro «et al»., 2004	Córrego da Prata (drenagem do S╞o Marcos, bacia do Paranaiba), 17°47'26"S 47°35'48"W, Municlpio de Catal╞o, Estado de Goiás, Brasil.	Bacia do alto Paranaiba.		Buckup et al 2007	RR	NAM	-17.7906	-47.5967	17	47	26	s	47	35	48	5	NAM	OTO	Localidade-tipo				CERRADO	353072	Upper Parana	PARANA	EN	B1a, b i;iii	6	PRN05	0	61	Bacia do São Marcos
366	203	Incertae	115	Psalidodon gymnodontus Eigenmann, 1911	Porto Uni╞o, rio Iguaçu, Brasil.	Bacia do Iguaçu.	Porto Uni╞o, rio Iguaçu	Species link - MZUSP	RR	NAM	-25.5333	-53.0167	0	0	0		0	0	0	3	OTO	OTO	Localidade-tipo	Referência; Eigenmann & Myers (1929).			Atlantic forest	63947	Iguassu	PARANA	EN	B1a, b i;iii	5	PRN54	0.0397719	13	Rio Iguaçu em Porto União
476	117	Incertae	115	Creagrutus mucipu Vari & Harold, 2001	Porto do Rub╞o, rio Tocantins, Municipio de Minaçu, Estado de Goiás, Brasil.	Bacia do alto Tocantins.	Rio Tocantins em Minaçu	ARCMAP	RR	NAM	-13.7384	-48.2795	13	44	18	s	48	16	46	5	NAM	OTO	Localidade-tipo	Vari & Harold (2001).			CERRADO	134393	Tocantins - Araguaia	TOCANTINS-ARAGUAIA	VU	D2	4	TOAR09	40.3789	100	Alto Rio Tocantins, Serra da Mesa
481	195	Incertae	115	Moenkhausia tergimacula Lucena & Lucena, 1999	Rio Tocantins, 3 km abaixo da represa de Serra da Mesa, Minaçu, 13°50'51"S 48°16'60", Estado de Goiás, Brasil.	Bacia do Tocantins.		Buckup et al 2007	RR	NAM	-13.8475	-48.2833	13	50	51	s	48	16	60	5	NAM	OTO	Localidade-tipo				CERRADO	134393	Tocantins - Araguaia	TOCANTINS-ARAGUAIA	VU	D2	4	TOAR09	40.3789	100	Alto Rio Tocantins, Serra da Mesa
496	81	Incertae	115	Astyanax elachylepis Bertaco & Lucinda, 2005	Ribeir╞o Arara, 14°02'S 48°26'W, cerca de 500 m da boca do rio Maranh╞o em Rosariana, Municlpio de Niquelândia, Estado de Goiás, Brasil.	Bacia do Tocantins.	Ribeir╞o Arara, Rosariana,Mun. Niquelândia, GO	Buckup et al. 2007	RR	NAM	-14.0333	-48.4333	14	2	0	s	48	26	0	5	NAM	OTO	Localidade-tipo				CERRADO	56931.1	Tocantins - Araguaia	TOCANTINS-ARAGUAIA	VU	D2	5	TOAR19	0	100	Rio Palmeira
504	119	Incertae	115	Creagrutus saxatilis Vari & Harold, 2001	Rio Indaial, afluente da margem esquerda do rio Maranh╞o, bacia do rio Tocantins, Niquelândia, aproximadamente 14°12'S 48°37W, Estado de Goiás, Brasil.	Bacia do alto TClcantins.		Buckup et al 2007	RR	NAM	-14.2	-48.6167	14	12	0	s	48	37	0	5	NAM	OTO	Localidade-tipo	Vari & Harold (2001).			CERRADO	24368.9	Tocantins - Araguaia	TOCANTINS-ARAGUAIA	VU	D2	6	TOAR24	0	100	Alto Rio Tocantins, Corrego Indaial
588	211	Lebiasinidae	129	Nannostomus stigmasenion (Fowler, 1913)	Tributário do rio Madeira, próximo a Porto Velho, Brasil.	Espécie conhecida apenas da localidade-tipo.	Porto velho RR	CIVI IBGE	RR	NAM	-8.8208	-63.9214	8	49	15	s	63	55	17	14	PAB	PAB: Corrigir para 08 49 15 S 63 55 17 (Proximidades de Porto Velho e Cachoeira do Santo Antônio)	Localidade-tipo				Amazonia	68315.7	Madeira Brazilian Shield	AMAZONICA	VU	D2	6	AMA53	28.8852	57	Rio Madeira, Porto Velho
51	396	Loricariinae	136	Harttia uatumensis Rapp Py-Daniel & Oliveira, 2001	Rio Uatum╞, em Santa Luzia, 1°50'13"S 59°28'36"W, Estado do Amazonas, Brasil.	Rio Uatum╞ e nos afluentes Pitinga e Jatapu.	Rio Uatum╞ em Santa Luzia, AM	Buckup et al. 2007	RR	NAM	-1.8369	-59.4767	1	50	13	s	59	28	36	12	OTO	OTO	Localidade-tlpo.				Amazonia	139850	Amazonas Lowlands	AMAZONICA	VU	D2	6	AMA08	36.8856	55	Uatumã/Pitinga
744	395	Loricariinae	136	Harttia trombetensis Rapp Py-Daniel & Oliveira, 2001	Rio Trombetas, cachoeira Vira-Mundo, 1°02'04"S 57°3'38"W, Estado do Pará, Brasil.	Bacia do Trombetas-Mapuera, acima da cachoeira Porteira.	Rio Mapuera, bacia do rio Trombetas, PA	Buckup et al 2007	RR	NAM	-1.0833	-57.0167	1	5	0	s	57	1	0	12	OTO		Localidade-tipo				Amazonia	15087.4	Amazonas Lowlands	AMAZONICA	VU	D2	5	AMA122	89.3209	81	Rio Trombetas, na região da Cachoeira Vira-Mundo
397	390	Loricariinae	136	Harttia kronei Miranda Ribeiro, 1908	Rio Bethary [Betari], Iporanga, Estado de S╞o Paulo, Brasil.	Rio Ribeira de Iguape.	Rio Betari SP	USBGN	RR	OTO	-24.6	-48.6	24	36	0	s	48	36	0	2	OTO	OTO	Localidade-tipo				Atlantic forest	58350	Ribeira de Iguape	ATLANTICO SUDESTE	VU	D2	5	ASE25	62.2441	95	Rio Iporanga
391	402	Loricariinae	136	Rineloricaria kronei Miranda Ribeiro, 1911	Rio Iporanga, Estado de S╞o Paulo, Brasil.	Rio Ribeira de Iguape.	Iporanga	Species Link MZUSP	RR	NAM	-24.5833	-48.5999	0	0	0		0	0	0	2	OTO	OTO	Localidade-tipo				Atlantic forest	58350	Ribeira de Iguape	ATLANTICO SUDESTE	VU	D2	5	ASE25	62.2441	95	Rio Iporanga
741	387	Loricariinae	136	Harttia duriventris Rapp Py-Daniel & Oliveira, 2001	Rio Tocantins, Igarapé Bacuri, 4°29'44"S 49°30'32"W, Estado do Pará, Brasil.	Bacia do Tocantins, acima da represa de Tucurul.	Bacia do Tocantins, igarapé Bacuri, PA	Buckup et al. 2007	RR	NAM	-4.4956	-49.5089	4	29	44	s	49	30	32	4	NAM	OTO	Localidade-tipo				Amazonia	23596	Tocantins - Araguaia	TOCANTINS-ARAGUAIA	VU	D2	4	TOAR69	71.6431	67	Afluente do Rio Tocantins, em Tucurui
298	5	Parodontidae	102	Apareiodon vladii Pavanelli, 2006	Rio Piquiri, a cerca de 5 km da vila de Paiquerê, Nova Laranjeiras, Estado do Paraná, Brasil.	Bacia do Piquiri, acima da desembocadura do rio Cantu, no Estado do Paraná.		Buckup et al 2007	RR	NAM	-25.028	-52.4591	25	1	41	s	52	27	33	3	OTO	OTO,PAB	Localidade-tipo				Atlantic forest	27549.9	Upper Parana	PARANA	EN	B1a, b i;iii	6	PRN28	0	2	Rio Piquiri em Nova Laranjeiras
477	0	Parodontidae	102	Apareiodon argenteus Pavanelli & Britski, 2003	Rio Tocantins em Serra da Mesa, a jusante da represa hidroelétrica, Municipio de Minaçu, Estado de Goiás, Brasil.	Bacia do alto Tocantins.	Afluente do Tocantins a jusante da Barragem UHESM	ARCMAP	RR	NAM	-13.7663	-48.2177	13	45	59	s	48	13	4	5	NAM	OTO	Localidade-tipo				CERRADO	134393	Tocantins - Araguaia	TOCANTINS-ARAGUAIA	VU	D2	4	TOAR09	40.3789	100	Alto Rio Tocantins, Serra da Mesa
482	1	Parodontidae	102	Apareiodon cavalcante Pavanelli & Britski, 2003	Ribeir╞o do Padre (tributário da margem direita do rio Tocantinzinho), Municipio de Cavalcante, Estado de Goiás, Brasil.	Bacia do alto Tocanlíns.	Afluente da margem direita do Tocantinzinho, na regi╞o da UHE Serra da Mesa	Arcmap	RR	NAM	-14.1461	-48.0478	14	8	46	s	48	2	52	5	NAM	OTO	Localidade-tipo				CERRADO	108532	Tocantins - Araguaia	TOCANTINS-ARAGUAIA	VU	D2	5	TOAR10	46.9788	100	Rio Tocantinzinho
585	569	Pimelodidae	139	Sorubim trigonocephalus Miranda Ribeiro, 1920	Porto Velho [Brasil].	Bacia do Madeira.	Rio Madeira prox a Porto Velho	Arcmap	RR	OTO	-8.7853	-63.935	8	47	7	s	63	56	6	14	PAB	PAB	Localidade-tipo				Amazonia	68315.7	Madeira Brazilian Shield	AMAZONICA	VU	D2	6	AMA53	28.8852	57	Rio Madeira, Porto Velho
326	567	Pimelodidae	139	Pimelodus paranaensis Britski & Langeani, 1988	Ilha Solteira (ensecadeira), rio Paraná, Estado de S╞o Paulo, Brasil.	Bacia do alto Paraná.	Rio Parana, em Ilha Solteira, SP	ARCMAP	RR	NAM	-20.4148	-51.3756	20	24	53	s	51	22	32	3	OTO	OTO	Localidade-tipo				Atlantic forest	27142.9	Upper Parana	PARANA	EN	B1a, b i;iii	5	PRN46	0	27	Rio Paraná em Ilha Solteira
373	570	Pimelodidae	139	Steindachneridion melanodermatum Garavello, 2005	Rio Iguaçu, a jusante da barragem de Salto Osório, aproximadamente 25°35'S 53°05'W, Municipio de Quedas do Iguaçu, Estado do Paraná, Brasil.	Bacia do 19uaçu.		Buckup et al 2007	RR	OTO	-25.5833	-53.0833	25	35	0	s	53	5	0	3	OTO	OTO	Localidade-tipo				Atlantic forest	7931.13	Iguassu	PARANA	CR	B1a, b i;iii	6	PRN58	0	7	Rio Chopim, Bacia do Iguaç·
167	561	Pimelodidae	139	Bagropsis reinhardti Lütken, ex Reinhardt, 1874	Rio das Velhas, Estado de Minas Gerais, Brasil.	Bacia do alto S╞o Francisco.	Rio das velhas, no mun de Lagoa Santa	USBGN e ARCMAP	RR	OTO	-19.5776	-43.8844	19	34	40	s	43	53	4	8	PAB	PAB	Localidade-tipo	Britski el ai. (1988), Burgess (1989).	Estado de Conservaç╞o: Deficiente de dados.		CERRADO	514066	S. Francisco	S├O FRANCISCO	VU	D2	6	SFR15	7.9215	84	Rio das Velhas em Lagoa Santa
719	771	Poeciliidae	251	Phalloceros zsp. I		Bacias do S╞o Jo╞o, do Cubat╞o (Norte) e de pequenos rio adjacentes que dre	Rio S╞o Jo╞o	Arcmap	RR	NAM	-26.1953	-48.9125	26	11	43	s	48	54	45	1	PAB	PAB: Corrigir para 26 11 43 s 48 54 45 w (ponte 1 km ao norte do trevo da estrada para Pirabeiraba e Campo Alegre)	Lote de referência (MCP 30405).	Lucinda & Reis (2005).			Atlantic forest	50149.9	Southeastern Mata Atlantica	ATLANTICO SUL	EN	B1a, b i;iii	5	ASU11	73.7345	68	Rio Cubatão em Joinville
321	519	Pseudopimelodidae	137	Microglanis garavelloi Shibatta & Benine, 2005	Ribeir╞o Taquarl, 23°12'24"S 50056'50"W, Municlplo de Jataizlnho, Estado do Paraná, Brasil.	Bacias do Paranapanema e do Tietê.		Buckup et al 2007	RR	OTO	-23.2067	-50.9472	23	12	24	s	50	56	50	10	NAM	OTO	Localidade-tipo				Atlantic forest	256453	Upper Parana	PARANA	EN	B1a, b i;iii	6	PRN42	0.295472	12	Ribeirão Taquari e Rio Tibaji
449	851	Pseudopimelodidae	137	Microglanis eurystoma Malabarba & Mahler Jr., 1998	Rio Uruguai, Itá, Estado de Santa Catarlna, Brasil.	Alto Uruguai, estados do Rio Grande do Sul e Santa Catarina.	Loc tipo		RR	OTO	-27.3	-52.3333	27	18	0	s	52	20	0	0		PAB: 27 18 00 s 52 20 00 w (localidade tipo)	Localidade-tipo				Atlantic forest	18415.5	Upper Uruguay	URUGUAI	EN	B1a, b i;iii	6	URU11	0	4	Alto Uruguai, Aratiba
467	521	Pseudopimelodidae	137	Microglanis malabarbai Bertaco & Cardoso, 2005	Arroio Albino, tributário do rio Ijul, bacia do Uruguai, 28°09'10"S 54°55'28"W, Municlpio de S╞o Pedro do Butiá, Estado do Rio Grande do Sul, Brasil.	Bacia do Ijul, no Estado do Rio Grande do Sul.	Arroio Albino, bacia do Uruguai	Buckup et al. 2007	RR	NAM	-28.1528	-54.9244	28	9	10	s	54	55	28	1	PAB	PAB	Localidade-tipo				Atlantic forest	112297	Lower Uruguay	URUGUAI	EN	B1a, b i;iii	6	URU14	0	7	Arroio Albino, Rio Ijuí
230	737	Rivulidae	250	Simpsonichthys ocellatus Costa, Nielsen & de Luca, 2001	Poça temporária próxima ao rio Jequitinhonha, perto de Itaobim, Estado de Minas Gerais, Brasil.	Bacia do médio Jequitinhonha.	Drenagem a W de itaobim	Arcmap	RR	NAM	-16.5903	-41.5532	16	35	25	s	41	33	12	8	PAB	PAB	Localidade-tipo				Atlantic forest	582400	Northeastern Mata Atlantica	ATLANTICO LESTE	VU	B1a, b i;iii	5	ALE15	6.64356	44	Medio Jequitinhonha
90	675	Rivulidae	250	Pituna xinguensis Costa & Nielsen «in» Costa, 2007	Lagoa temporária em ilha do Rio Xingu, Altamira, 3º13?34.6"S 52°12?26.1"W, altitude 39m, Estado do Pará, Brasil.	Espécie conhecida apenas da localidade-tipo.	Localidade-tipo	Costa et al 2007	RRT	PAB	-3.2263	-52.2073	3	13	35	s	52	12	26	4	NAM	PAB	Localidade-tipo				Amazonia	136125	Xingu	AMAZONICA	EN	B1a, b i;iii	5	AMA33	0	34	Rio Xingu, Altamira
91	676	Rivulidae	250	Plesiolebias altamira Costa & Nielsen «in» Costa, 2007	Lagoa temporária em ilha do Rio Xingu, Altamira, 3º13?34.6"S 52°12?26.1"W, altitude 39m, Estado do Pará, Brasil.	Espécie conhecida apenas da localidade-tipo.	Localidade-tipo	Costa et al 2007	RRT	PAB	-3.2263	-52.2073	3	13	35	s	52	12	26	4	NAM	PAB	Localidade-tipo				Amazonia	136125	Xingu	AMAZONICA	EN	B1a, b i;iii	5	AMA33	0	34	Rio Xingu, Altamira
92	740	Rivulidae	250	Simpsonichthys reticulatus Costa & Nielsen, 2003	Altamira, Estado do Pará, Brasil.	Bacia do Xingu.		Costa et al 2007	RR	NAM	-3.2263	-52.2073	3	13	35	s	52	12	26	4	NAM	OTO	Localidade-tipo				Amazonia	136125	Xingu	AMAZONICA	EN	B1a, b i;iii	5	AMA33	0	34	Rio Xingu, Altamira
427	652	Rivulidae	250	Leptolebias minimus (Myers, 1942)	Itaguaí, Estado do Rio de Janeiro, Brasil.	Baixadas costeiras, oeste do Rio de Janeiro.	Brejo no Horto Florestal Santa Cruz, Seropédica.	Species Link MZUSP 36296	RR	NAM	-22.8666	-43.7666	0	0	0		0	0	0	8	PAB	PAB	Localidade-tipo	Costa (1988a).	Estado de Conservaç╞o: Vulnerável.	Categoria de ameaça em listas regionais: Vulneráve	Atlantic forest	30787.5	Ribeira de Iguape	ATLANTICO SUDESTE	EN	B1a, b i;iii	6	ASE37	0.599289	19	Drenagens costeiras em Itaguaí
663	688	Rivulidae	250	Rivulus dapazi Costa, 2005	C6rrego Confus╞o, tributário do rio Confus╞o, bacia do Paraguai, 17°33'56,4S 54°44'23,8W, Sonora, Estado de Mato Grosso do Sul, Brasil.	Bacia do aito Correntes, na bacia do Paraguai, Brasil central.		Buckup et al 2007	RR	NAM	-17.5657	-54.7399	17	33	56	s	54	44	24	3	OTO	OTO	Localidade-tipo				CERRADO	120900	Paraguay	PARAGUAI	EN	B1a, b i;iii	6	PRG15	6.7246	7	Bacia do Rio Correntes
330	707	Rivulidae	250	Rivulus vittatus Costa, 1989	192 km ao sul de Jatai, Estado de Goiás, Brasil.	Bacia do alto Paraná, Brasil.		Species Link MZUSP	RR	NAM	-19	-50.5	0	0	0		0	0	0	5	NAM	OTO	Localidade-tipo				Atlantic forest	37562.4	Upper Parana	PARANA	EN	B1a, b i;iii	6	PRN48	0	0	Rio Paranaíba, em São Simão
95	70	Serrasalminae	111	Ossubtus xinguense Jégu, 1992	Altamira, rio Xingu, Estado do Pará, Brasil.	Bacia do Xingu, no Estado do Pará.	Rio Xingu 10km ao sul de Altamira	ARCMAP	RR	OTO	-3.2911	-52.2228	3	17	28	s	52	13	22	4	NAM	OTO	Localidade-tipo		Estado de Conservaç╞o: Vulnerável.	Categoria de ameaça em listas regionais: Vulneráve	Amazonia	132525	Xingu	AMAZONICA	EN	B1a, b i;iii	5	AMA34	0	46	Rio Xingu, Costa Junior, Altamira
226	256	Trichomycterinae	133	Trichomycterus landinga Triques & Vono, 2004	Córrego Moquém, bacia do Jequitinhonha, Municipio de Coronel Murta, 16°45'S 42'35'W, Estado de Minas Gerais, Brasil.	Espécie conhecida apenas da localidade-tipo.		Buckup et al 2007	RRT	NAM	-16.75	-42.5833	16	45	0	s	42	35	0	8	PAB	PAB	Localidade-tipo				CERRADO	81725	Northeastern Mata Atlantica	ATLANTICO LESTE	VU	D2	4	ALE12	0.00187726	88	Rio Jequitinhonha
246	264	Trichomycterinae	133	Trichomycterus pantherinus Alencar & Costa, 2004	Rio da Prata, abaixo da Fazenda Sete Quedas, 20°03'15.9"S 40°32'20.5"W, bacia do rio Santa Maria da Vitória, Municipio de Santa Leopoldina, Estado do Espirito Santo, Brasil.	Espécie conhecida apenas da localidade-tipo.		Buckup et al 2007	RRT	NAM	-20.0544	-40.539	20	3	16	s	40	32	21	8	PAB	PAB	Localidade-tipo				Atlantic forest	28303	Northeastern Mata Atlantica	ATLANTICO SUDESTE	EN	B1a, b i;iii	5	ASE05	0	62	Rio da Prata, bacia do Santa Maria
341	236	Trichomycterinae	133	Trichomycterus albinotatus Costa, 1992	1 km a oeste da Vila de Maromba, rio Preto, Bacia do rio Paraíba, 22°30'S 44°15'W, Visconde de Mauá, Estado do Rio de Janeiro, Brasil.	Espécie conhecida apenas da localidade-tipo.		Buckup et al 2007	RRT	NAM	-22.5	-44.25	22	30	0	s	44	15	0	9	OTO	OTO	Localidade-tipo		Estado de Conservaç╞o: Deficiente de dados.	Categoria de ameaça em listas regionais: Vulneráve	Atlantic forest	917764	Paraiba do Sul	ATLANTICO SUDESTE	VU	B1a, b i;iii	5	ASE08	15.3248	43	Rio Paraiba do Sul
342	237	Trichomycterinae	133	Trichomycterus auroguttatus Costa, 1992	1 km a oeste da Vila de Visconde de Mauá, rio Marimbondo, afluente do rio Preto, bacia do rio Paraíba, 22°30'S 44°15'W, Estado do Rio de Janeiro, Brasil.	Espécie conhecida apenas da localidade-tipo.		Buckup et al 2007	RRT	NAM	-22.5	-44.25	22	30	0	s	44	15	0	9	OTO	OTO	Localidade-tipo		Estado de Conservaç╞o: Deficiente de dados.	Categoria de ameaça em listas regionais: Vulneráve	Atlantic forest	917764	Paraiba do Sul	ATLANTICO SUDESTE	VU	B1a, b i;iii	5	ASE08	15.3248	43	Rio Paraiba do Sul
335	253	Trichomycterinae	133	Trichomycterus itatiayae Miranda Ribeiro, 1906	Itatiaya [=Itatiaia], .. em córrego afluente do Parahyba [=Paralba do Sul], 22°27'S 44°50'W, Estado do Rio de Janeiro, Brasil.	Espécie conhecida apenas da localidade-tipo.		Buckup et al 2007	RRT	NAM	-22.45	-44.8333	22	27	0	s	44	50	0	9	OTO	OTO	Localidade-tipo				Atlantic forest	514929	Paraiba do Sul	ATLANTICO SUDESTE	VU	B1a, b i;iii	5	ASE08	15.3248	43	Rio Paraiba do Sul
340	260	Trichomycterinae	133	Trichomycterus mimonha Costa, 1992	Dois km ao norte da Vila de Piquete, rio Benfica, 22°50'S 45°10'W, bacia do Paraiba [do Sul], Estado de S╞o Paulo, Brasil.	Espécie conhecida apenas da localidade-tipo.		Buckup et al 2007	RRT	NAM	-22.8333	-45.1667	22	50	0	s	45	10	0	9	OTO	OTO	Localidade-tipo		Estado de Conservaç╞o: Deficiente de dados.	Categoria de ameaça em listas regionais: Vulneráve	Atlantic forest	514929	Paraiba do Sul	ATLANTICO SUDESTE	VU	B1a, b i;iii	5	ASE08	15.3248	43	Rio Paraiba do Sul
343	261	Trichomycterinae	133	Trichomycterus mirissumba Costa, 1992	Visconde de Mauá, 22°30'S 44°15'W, 1 km à leste da Vila de Maromba, rio Preto, próximo da confluência do córrego Santa Clara, bacia do rio Paraiba, Estado do Rio de Janeiro, Brasil.	Espécie conhecida apenas da localidade-tipo.		Buckup et al 2007	RRT	NAM	-22.5	-44.25	22	30	0	s	44	15	0	9	OTO	OTO	Localidade-tipo		Estado de Conservaç╞o: Deficiente de dados.	Categoría de ameaça em listas regionais: Vulneráve	Atlantic forest	917764	Paraiba do Sul	ATLANTICO SUDESTE	VU	B1a, b i;iii	5	ASE08	15.3248	43	Rio Paraiba do Sul
396	279	Trichomycterinae	133	Trichomycterus tupinamba Wosiacki & Oyakawa, 2005	Rio Betari, tributário do rio Ribeira de Iguape, em frente ao camping do Nécleo Santa na, Parque Estadual Turlstico do Alto Ribeira (PETAR), Iporanga, Estado de S╞o Paulo, Brasil.	Drenagens do Betarl e do Iporanga, na bacia do Ribeira de Iguape.	Rio Betari SP	USBGN	RR	NAM	-24.6	-48.6	24	36	0	s	48	36	0	2	OTO	OTO	Localidade-tipo				Atlantic forest	58350	Ribeira de Iguape	ATLANTICO SUDESTE	VU	D2	5	ASE25	62.2441	95	Rio Iporanga
313	258	Trichomycterinae	133	Trichomycterus maracaya Bockmann & Sazima, 2004	Córrego sem nome, bacia do rio Pardo, base do Morro do Ferro, Poços de Caldas, 46°31'50"S 21°46'45''W, Estado de Minas Gerais, Brasil.	Espécie conhecida apenas da localidade-tipo.		Buckup et al 2007	RR	NAM	-21.7792	-46.5306	21	46	45	s	46	31	50	9	OTO	OTO	Localidade-tipo				Atlantic forest	453941	Upper Parana	PARANA	EN	B1a, b i;iii	6	PRN35	0.257554	22	Bacia do Rio Pardo na região de Poços de Caldas
162	239	Trichomycterinae	133	Trichomycterus brasiliensis Lütken, 1874	Rio das Velhas, 17°10'S 46°31'W, foz do rio das Velhas, bacia do S╞o Francisco, Estado de Minas Gerais, Brasil.	Espécie conhecida apenas da localidade-tipo.	Rio das velhas, no mun de Lagoa Santa	USBGN e ARCMAP	RRT	NAM	-19.5776	-43.8844	19	34	40	s	43	53	4	8	PAB	PAB	Localidade-tipo				CERRADO	514066	S. Francisco	S├O FRANCISCO	VU	D2	6	SFR15	7.9215	84	Rio das Velhas em Lagoa Santa
377	782	Anablepidae	252	Jenynsia diphyes Lucinda, Ghedotti & Graça, 2006	Córrego Passo do Aterrado, afluente do rio Jord╞o, bacia do Iguaçu, Reserva do Iguaçu, 25°45'23"S 52°03'23"W, Estado do Paraná, Brasil.	Bacia do Jord╞o, tributário do rio iguaçu.		Buckup et al 2007	RRT	OTO	-25.7564	-52.0564	25	45	23	s	52	3	23	3	OTO	OTO	Localidade-tipo				Atlantic forest	17993.6	Iguassu	PARANA	EN	B1a, b i;iii	5	PRN61	0	38	Corrego Passo do Aterrado, Bacia do Rio Jordão
433	504	Ancistrinae	137	Parancistrus nudiventris Rapp Py-Daniel & Zuanon, 2005	Rio Xingu, ilha do Bacabal, 3°23'19"S 51°43'24'W, Estado do Pará, Brasil.	Bacia do baixo Xingu		Buckup et al 2007	RR	NAM	-3.3886	-51.7233	3	23	19	s	51	43	24	4	NAM	OTO	Localidade-tipo				Amazonia	92374.9	Amazonas Estuary & Coastal Drainages	AMAZONICA	EN	B1a, b i;iii	5	AMA46	2.9713	54	Rio Xingu, Cachoeira do Bacabal
659	483	Ancistrinae	137	Ancistrus parecis Fisch-Muller, Cardoso, Silva, Bertaco, 2005	Rio Formiga, tributário do rio Juruena, bacia do alto Tapajós, na estrada entre Campos de Jélio e Sapezal, 13°41'01"S 59°12'11"W, Municipio de Campos de Jélio, Estado do Mato Grosso, Brasil.	Tributário do rio Juruena, na Chapada dos Parcis, bacia do alto Tapajós.		Buckup et al 2007	RR	NAM	-13.6836	-59.2031	13	41	1	s	59	12	11	3	OTO	OTO	Localidade-tipo				CERRADO	207057	Tapajos - Juruena	AMAZONICA	EN	B1a, b i;iii	5	AMA79	0	49	Rio Formiga, Alto Juruena
223	22	Anostomidae	104	Leporinus steindachneri Eigenmann, 1907	Rio Arassuaí, afluente do Jequitinhonha, Estado de Minas Gerais, Brasil.	Rio Jequitinhonha.	Rio arassuaí, afuente do Jequitinhonha, MG	Species link - MZUSP	RR	NAM	-16.5472	-42.7875	0	0	0		0	0	0	8	PAB	PAB	Localidade-tipo				CERRADO	508677	Northeastern Mata Atlantica	ATLANTICO LESTE	VU	B1a, b i;iii	4	ALE10	6.65234	57	Rio Itacambiruçu
575	15	Anostomidae	104	Leporinus aripuanaensis Garavello & Santos, 1992	Rio Aripuan╞, Estado do Mato Grosso, Brasil.	Rio Aripuan╞, bacia do Amazonas.	Rio Aripuan╞	Species link Mzusp	RR	NAM	-9.966	-59.31	0	0	0		0	0	0	14	PAB	PAB	Localidade-tipo				Amazonia	32368.8	Madeira Brazilian Shield	AMAZONICA	VU	D2	6	AMA48	0	88	Igarapé do Porto, Rio Aripuanã
648	21	Anostomidae	104	Leporinus sexstriatus Britski & Garavello, 1980	Rio Papagaio, acima de Utiariti, Estado de Mato Grosso, Brasil.	Bacia do Tapajós.	Rio Papagaio, acima de Utiariti, MT	Species link - MZUSP	RR	NAM	-13.0333	-58.2833	0	0	0		0	0	0	14	PAB	PAB	Localidade-tipo				CERRADO	22253.1	Tapajos - Juruena	AMAZONICA	VU	D2	6	AMA72	98.765	100	Rio Papagaio
266	19	Anostomidae	104	Leporinus microphthalmus Garavello, 1989	Rio Araguari, salto de Nova Ponte, Nova Ponte, Estado de Minas Gerais, Brasil.	Bacia do alto Paraná.	Rio Araguari em Nova Ponte, MG	Arcmap	RR ?	NAM	-19.2523	-47.6455	19	15	8	s	47	38	44	5	NAM	OTO	Localidade-tipo				CERRADO	92809.2	Upper Parana	PARANA	EN	B1a, b i;iii	6	PRN03	0	1	Rio Araguari, Nova Ponte
710	14	Anostomidae	104	Leporinus amae Godoy, 1980	Rio Apuaê.	Bacia do alto Uruguai.		??	RR	NAM	-27.533	-51.866	27	39	48	s	51	58	45	1	PAB	PAB: Corrigir -27 39' 48,81216'' -51 58' 45,79675'' (rio Apuaê)	Localidade-tipo				Atlantic forest	10612.6	Upper Uruguay	URUGUAI	EN	B1a, b i;iii	6	URU18	0	8	Rio Apuaé em MArcelino Ramos
277	580	Auchenipteridae	141	Glanidium cesarpintoi von Ihering, 1928	Cachoeira de Emas, rio Mogi Guaçu, Estado de S╞o Pauio, Brasil.	Bacia do alto Paraná, no Estado de S╞o Paulo.	Cachoeira de Emas, SP	USBGN	RR	NAM	-21.9333	-47.3667	21	56	0	s	47	22	0	11	NAM	OTO	Localidade-tipo				Atlantic forest	227825	Upper Parana	PARANA	EN	B1a, b i;iii	6	PRN09	2.52998	4	Córrego Paulicéia e bacia do Mogi Guaçu
272	320	Callichthyidae	134	Corydoras difluviatilis Britto & Castro, 2002	Municipio de Santa Rita do Passa Quatro, Parque Estadual de Vassununga, Gleba Pédo-Gigante, córrego Paulicéia, afluente do rio Pardo, bacia do rio Paraná, 21°38'S 47°38'W, Estado de S╞o Paul	Bacia do Paraná.	Córrego Pauliceia, afl. Rio Pardo,SP	Buckup et al. 2007	RR	NAM	-21.6333	-47.6333	21	38	0	s	47	38	0	11	NAM	OTO	Localidade-tipo	Britto & Castro (2002).			CERRADO	227825	Upper Parana	PARANA	EN	B1a, b i;iii	6	PRN09	2.52998	4	Córrego Paulicéia e bacia do Mogi Guaçu
308	61	Cheirodontinae	111	Spintherobolus papilliferus Eigenmann, 1911	Alto da Serra, Estado de S╞o Paulo, Brasil.	Cabeceiras do rio Tietê, Estado de S╞o Paulo, Brasil.	Parque Estadual da Cantareira, Nécleo Engordador, Riacho da Cachoeira do Engordador (registro do MZUSP em 2000)	Species Link MZUSP 63135	RR	NAM	-23.6581	-46.5517	0	0	0		0	0	0	9	OTO	OTO	Localidade-tipo	Weitzman & Malabarba (1999).	Estado de Conservaç╞o: Em perigo.	Categoria de ameaça em listas regionais: Vulneráve	Atlantic forest	270669	Upper Parana	PARANA	EN	B1a, b i;iii	5	PRN30	9.31808	37	Alto TietÛ
48	854	Cichlidae	387	Cichla jariina Kullander & Ferreira, 2006	Rio Jari, a jusante da Cachoeira Santo Antônio, Estado do Pará, Brasil.	Rio Jari, na regi╞o das cachoeiras Itacari e Santo Antônio.			RR	OTO	-0.6594	-52.5133	0	39	34	s	52	30	48	0		PAB: 00 39 34 s 52 30 48 w (rio Jari, abaixo da Cachoeira de Santo Antônio)	Localidade-tipo				Amazonia	31774.8	Amazonas Guiana Shield	AMAZONICA	VU	D2	5	AMA115	7.26618	96	Rio Jari, nas cachoeiras Itacari e Santo Antonio
576	822	Cichlidae	387	Crenicichla pellegrini Ploeg, 1991	Igarapé do Porto, rio Aripuan╞, bacia do Madeira, Estado do Mato Grosso, Brasil.	Bacia do Aripuan╞.	Rio Aripuan╞	Species link Mzusp	RR	NAM	-9.966	-59.316	0	0	0		0	0	0	14	PAB	PAB	Localidade-tipo				Amazonia	32368.8	Madeira Brazilian Shield	AMAZONICA	VU	D2	6	AMA48	0	88	Igarapé do Porto, Rio Aripuanã
594	803	Cichlidae	387	Apistogramma pulchra Kullander, 1980	Rio Preto, tributário do rio Candeias, 8"46'S 63"45'W, 25 km de Porto Velho, [Estado] de Rondônia, Brasil.	Bacia do Madeira.		Buckup et al 2007	RR	OTO	-8.7667	-63.75	8	46	0	s	63	45	0	14	PAB	PAB	Localidade-tipo				Amazonia	64977.9	Madeira Brazilian Shield	AMAZONICA	EN	B1a, b i;iii	6	AMA59	2.01467	55	Rio Candeias
664	790	Cichlidae	387	Aequidens plagiozonatus Kullander, 1984	Lagos internos da bacia do Piquiri-Itiquira, Itiquira, Estado do Mato Grosso, Brasil.	Bacia do Piquiri-Itiquira.	bacia do Piquri-Itiquira, Mato Grosso	Spécies link MZUSP	RR	NAM	-17.2	-54.15	0	0	0		0	0	0	3	OTO	OTO	Localidade-tipo				CERRADO	164357	Paraguay	PARAGUAI	EN	B1a, b i;iii	6	PRG16	0.323117	0	Rio Itiquira
332	809	Cichlidae	387	Crenicichla britskii Kullander, 1982	Riacho acima da BR-153, km 143, bacia do Tietê, Municipio de Promiss╞o, Estado de S╞o Paulo, Brasil.	Bacia do alto Paraná.	Promiss╞o SP	Cent mun	RR	NAM	-21.4905	-49.8129	0	0	0		0	0	0	10	NAM	OTO	Localidade-tipo				Atlantic forest	63928.2	Upper Parana	PARANA	EN	B1a, b i;iii	6	PRN50	0	4	Bacia do Ribeirão dos Patos, Promissão
439	825	Cichlidae	387	Crenicichla prenda Lucena & Kullander, 1992	Rio Jacutinga (na estrada BR 283), Estado de Santa Catarina, Brasil.	Rio Jacutinga, bacia do Uruguai, Brasil e Uruguai.	Rio Jacutinga x BR 282	ARCMAP	RR	OTO	-27.1878	-52.1672	27	11	16	s	52	10	2	1	PAB	PAB: Corrigir para 27 11 16 s 52 10 02 w (BR-283 e rio Jacutinga))	Localidade-tipo				Atlantic forest	95100	Upper Uruguay	URUGUAI	EN	B1a, b i;iii	6	URU01	0	14	Rio Jacutinga
450	856	Cichlidae	387	Crenicichla jurubi Lucena & Kullander, 1992	Rio Marombas abaixo da ponte Irineu Bornhausen, Estado de Santa Catarina, Brasil.	Bacia do Uruguai, no Uruguai e Brasil.	Loc imprecisa, dist aparentemente ampla		RR	OTO	-27.1833	-52.5667	27	11	0	s	52	34	0	0		PAB: 27 11 00 s 52 34 00 w (MCP 14326)	Localidade-tipo				Atlantic forest	27325	Upper Uruguay	URUGUAI	EN	B1a, b i;iii	6	URU12	5.73939	9	Alto Uruguai em Chapecó
468	819	Cichlidae	387	Crenicichla minuano Lucena & Kullander, 1992	Rio Comanda i, Estado do Rio Grande do Sul, Brasil.	Rio Comandai, rio Ijui, rio Piratinim e rio Canoas, Brasil.	Alto Comandaí, a montante de Sete de Setembro, RS	ARCMAP	RRT	OTO	-28.1525	-54.3708	28	9	9	s	54	22	15	1	PAB	PAB: Sp é RRT.	Localidade-tipo				Atlantic forest	130813	Lower Uruguay	URUGUAI	EN	B1a, b i;iii	6	URU15	0	1	Rio Comandaí
469	820	Cichlidae	387	Crenicichla missioneira Lucena & Kullander, 1992	Rio Comandai, Estado do Rio Grande do Sul, Brasil.	Rio Comandai, rio Ijui, rio Piratinim e rio Canoas, Brasil.	Alto Comandaí, a montante de Sete de Setembro, RS	ARCMAP	RRT	OTO	-28.1525	-54.3708	28	9	9	s	54	22	15	1	PAB	PAB: Sp é RRT.	Localidade-tipo				Atlantic forest	130813	Lower Uruguay	URUGUAI	EN	B1a, b i;iii	6	URU15	0	1	Rio Comandaí
379	34	Crenuchidae	107	Characidium oiticicai Travassos, 1967	Córre90 na Estaç╞o Biológica de Paranapiacaba, Paranapiacaba, Estado de S╞o Paulo, Brasil.	Cabeceiras do rio Tietê.	Serra de Paranapiacaba	USBGN	RR	PAB	-23.7764	-46.325	23	46	35	s	46	19	30	2	OTO	PAB: Corrigir para 23 46 35 S 46 19 30 W (Estaç╞o Biológcia de Paranapiacaba)	Localidade-tipo				Atlantic forest	21488.3	Ribeira de Iguape	ATLANTICO SUDESTE	VU	D2	5	ASE22	47.6265	80	Drenagens costeiras em Cubatão
438	35	Crenuchidae	107	Characidium serrano Buckup & Reis, 1997	Rio Jacutinga na estrada BR283 entre Seara e Concórdia, Municlpio de Concórdia, Estado de Santa Catarina, Brasil.	Bacia do alto Uruguai.	Rio Jacutinga, trecho Seara-Concordia	ARCMAP	RR	PAB	-27.1664	-52.1468	27	9	59	s	52	8	48	1	PAB	PAB	Localidade-tipo			Categoria de ameaça em listas regionais: Deficient	Atlantic forest	95100	Upper Uruguay	URUGUAI	EN	B1a, b i;iii	6	URU01	0	14	Rio Jacutinga
265	10	Curimatidae	103	Steindachnerina corumbae Pavanelli & Britski, 1999	Rio Pirapitinga, tributário do rio Corumbá,Caldas Novas, Estado de Goiás, Brasil.	Bacia do Corumbá.		Buckup et al 2007	RR	NAM	-17.8	-48.55	17	48	0	s	48	33	0	5	NAM	OTO	Localidade-tipo	Pavanelli & Britski (1999).			CERRADO	11956.4	Upper Parana	PARANA	EN	B1a, b i;iii	6	PRN02	0	0	Rio Corumbá
263	853	Doradidae	140	Wertheimeria maculata Steindachner, 1877	Rio Jequitinhonha, Brasil.	Bacia do Jequitinhonha.	Confluencia jequitinhonha arassuai		RR	OTO	-16.7631	-42.0094	16	45	47	s	42	0	34	0		PAB: 16 45 47 s 42 00 34 w (confluência dos rios Jquitinhonha e Araçuaí)	Localidade-tipo	Higuchi (1992), Sabaj & Ferraris (2003).			Atlantic forest	11775	Northeastern Mata Atlantica	ATLANTICO LESTE	EN	B1a, b i;iii	5	ALE35	0	28	Rio Jequitinhonha em Araçuai
305	62	Glandulocaudinae	111	Glandulocauda melanogenys Eigenmann, 1911	Alto da Serra, Estado de S╞o Paulo, Brasil.	Alto curso do rio Tietê.	Mogi das cruzes, fishbase, alto da serra	ARCMAP	RR	NAM	-23.6452	-46.1728	23	38	43	s	46	10	22	9	OTO	OTO	Localidade-tipo	Menezes & Weitzman (1990).	Estado de Conservaç╞o: Em perigo.	Categoria de ameaça em listas regionais: Vulneráve	Atlantic forest	270669	Upper Parana	PARANA	EN	B1a, b i;iii	5	PRN30	9.31808	37	Alto TietÛ
380	527	Heptapteridae	138	Chasmocranus lopezi Miranda Ribeiro, 1968	Córrego Quente, Cubatáo r?], Estado de Sáo Paulo, Brasil.	Rio costeiro indeterminado no Estado de S╞o Pauio.	Drenagem costeira em Cubat╞o	ARCMAP	RR	OTO	-23.8892	-46.4589	23	53	21	s	46	27	32	9	OTO	OTO	Documentaç╞o prímária: Localidade-tipo.				Atlantic forest	57758.2	Ribeira de Iguape	ATLANTICO SUDESTE	VU	D2	5	ASE22	47.6265	80	Drenagens costeiras em Cubatão
720	528	Heptapteridae	138	Chasmocranus truncatorostris Borodin, 1927	Col. Hansa, Joinville, Estado de Santa Catharina, Brasil.	Bacias costeiras do Estado de Santa Catarina.	Joinville	CIVI IBGE	RR	NAM	-26.3044	-48.8456	26	18	16	s	48	50	44	1	PAB	PAB	Documentaç╞o prímária: Localidade-tipo.			Categoria de ameaça em listas regionais: Vulneráve	Atlantic forest	25184.3	Southeastern Mata Atlantica	ATLANTICO SUL	EN	B1a, b i;iii	5	ASU12	16.092	56	Bacias Costeiras em Joinville e Araquari
285	536	Heptapteridae	138	Phenacorhamdia unifasciata Britski, 1993	Ribeir╞o Santana, afiuente do rio S╞o Bartolomeu, 15°50'N 4740'W, Distrito Federal, Brasil.	Alto Paraná.	Ribeir╞o Santana	Arcmap	RR	NAM	-16.015	-47.8187	16	0	54	s	47	49	7	5	NAM	OTO	Localidade-tipo	Bockmann (1998).			CERRADO	166429	Upper Parana	PARANA	EN	B1a, b i;iii	6	PRN16	42.4343	47	Ribeirão Santana e Rio São Bartolomeu
302	558	Heptapteridae	138	Taunayia bifasciata (Eigenmann & Norris, 1900)	S╞o Paulo, Brasil.	Bacias do alto Paraiba do Sul e alto Tietê.	Alto da Serra da Cantereira, no PE Cantareira, Riacho engordador, coordenada de Spitherobolus pappiliferus	Species Link MZUSP	RR	OTO	-23.3944	-46.5872	0	0	0		0	0	0	9	OTO	OTO	Localidade-tipo	Oliveira & Britski (2000).	Estado de Conservaç╞o: Vulnerável.		Atlantic forest	270669	Upper Parana	PARANA	EN	B1a, b i;iii	5	PRN30	9.31808	37	Alto TietÛ
324	529	Heptapteridae	138	Heptapterus multiradiatus Ihering, 1907	Ribeir╞o do Alto da Serra, Estado de S╞o Paulo, Brasil.	Curso superior do rio Tietê.	Ribeir╞o no alto da Serra, S╞o Paulo	Species link -MZUSP	RRT	NAM, OTO	-23.7166	-46.4166	0	0	0		0	0	0	9	OTO	OTO	Localidade-tipo	Bockmann (1998).	Estado de Conservaç╞o: Em perigo.	Categoria de ameaça em listas regionais: Vulneráve	Atlantic forest	25247.3	Upper Parana	PARANA	EN	B1a, b i;iii	6	PRN44	0	54	Alto TietÛ no Alto da Serra
352	373	Hypoptopomatinae	136	Parotocinclus muriaensis Gauger & Buckup, 2005	Rio Muriaé, tributário da margem esquerda do Paraiba do Sul, próximo a intersecç╞o da BR 356 e BR 186,20 km a jusante de Itaperuna, aprox. 21°15'S 41°45"W, Mun. de Itaperuna, Estado do Rio d	Espécie conhecida apenas da localidade-tipo.		Buckup et al 2007	RRT	NAM	-21.25	-41.75	21	15	0	s	41	45	0	8	PAB	PAB	Localidade-tipo				Atlantic forest	13209.4	Paraiba do Sul	ATLANTICO SUDESTE	EN	B1a, b i;iii	6	ASE15	0	7	Rio Muriaé
758	350	Hypoptopomatinae	136	Eurycheilichthys zsp. 1		Bacia do Taquari, Estado do Rio Grande do Sul.	Sanga Taquari, Em S╞o Francisco de Assis RS	ARCMAP	RR		-29.0525	-52.5806	29	3	9	s	52	34	50	1	PAB	PAB: Corrigir para 29°03'09"S, 52°34'50"W (MCP 40660)	Documentaç30 primária: Lote de referência (MCP 406				Atlantic forest	64062.5	Laguna dos Patos	ATLANTICO SUL	VU	D2	6	ASU19	0	74	Bacia do Taquari
759	352	Hypoptopomatinae	136	Eurycheilichthys zsp. 3		Bacia do Taquari, Estado do Rio Grande do Sul.	Sanga Taquari, Em S╞o Francisco de Assis RS	ARCMAP	RR		-28.6344	-51.6147	28	38	4	s	51	36	53	1	PAB	PAB: Corrigir para 28°38'04"S, 51°36'53"W (MCP 40663)	Lote de referência (MCP 40663).				Atlantic forest	49112.4	Laguna dos Patos	ATLANTICO SUL	VU	D2	6	ASU20	0	73	Bacia do Rio da Prata
760	354	Hypoptopomatinae	136	Eurycheilichthys zsp. 5		Bacia do Taquari, Estado do Rio Grande do Sul.	Sanga Taquari, Em S╞o Francisco de Assis RS	ARCMAP	RR		-28.3642	-51.2981	28	21	51	s	51	17	53	1	PAB	PAB: Corrigir para 28°21'51"S, 51°17'53"W (MCP 40661)	Lote de referência (MCP 40661).				Atlantic forest	115058	Laguna dos Patos	ATLANTICO SUL	VU	D2	6	ASU21	0.240382	79	Bacia do Rio Santa Rita
813	351	Hypoptopomatinae	136	Eurycheilichthys zsp. 2		Bacia do Taquari, Estado do Rio Grande do Sul.	Sanga Taquari, Em S╞o Francisco de Assis RS	ARCMAP	RR		-28.8067	-52.3039	28	48	24	s	52	18	14	1	PAB	PAB: Corrigir para 28°48'24"S, 52°18'14"W (MCP 40662)	Lote de referência (MCP 40662).				Atlantic forest	80931.4	Laguna dos Patos	ATLANTICO SUL	EN	B1a, b i;iii	6	ASU54	0	68	Rio Forqueta
818	849	Hypoptopomatinae	136	Eurycheilichthys zsp. 7		Drenagem do alto Antas (bacia do Jacui).			RR	NAM	-29.2833	-50.2333	29	17	0	s	50	14	0	0		PAB: 29 17 00 S 50 14 00 W (MCP 40665)	Lote de referência (MCP 40665).				Atlantic forest	142522	Tramandai - Mampituba	ATLANTICO SUL	VU	D2	6	ASU59	17.6777	90	Afluentos do Alto Rio das Antas
301	380	Hypoptopomatinae	136	Pseudotocinclus tietensis (R. Ihering, 1907)	Rio Tietê, Estado de S╞o Paulo, Brasil.	Bacia do alto Tietê.	Riacho no nécleo Barrocada, Parque Estadual da Cantareira.	Species Link MZUSP 87766	RR	NAM	-23.3858	-46.5655	0	0	0		0	0	0	9	OTO	OTO	Localidade-tipo		Estado de Conservaç╞o: Vulnerável.	Categoria de ameaça em listas regionais: Provavelm	Atlantic forest	270669	Upper Parana	PARANA	EN	B1a, b i;iii	5	PRN30	9.31808	37	Alto TietÛ
419	419	Hypostominae	136	Hypostomus interruptus (Miranda Ribeiro, 1918)	Rio Juquiá, Poço Grande, Estado de S╞o Paulo, Brasil.	Bacia do Ribeira da Iguape.	4-6.iii.1994:,Rio Saibadela, Base Saibadela, fazenda Intervales.	Species link MZUSP 51913	RR	NAM	-24.3266	-47.5056	0	0	0		0	0	0	2	OTO	OTO	Localidade-tipo				Atlantic forest	177784	Ribeira de Iguape	ATLANTICO SUDESTE	VU	D2	5	ASE31	76.9638	91	Afluentes do Rio Juquiá em Miracatu e Pedro de Toledo
421	431	Hypostominae	136	Hypostomus tapijara Oyakawa, Akama & Zanata, 2005	Rio Catas Altas, Ribeira, Estado de S╞o Paulo, Brasil.	Rios de maior porte na bacia do Ribeira de Iguape, rios Ribeira de Iguape,	Rio do Batatal, Alto Curso	ARCMAP	RR	OTO	-24.748	-48.3484	24	44	53	s	48	20	54	2	OTO	OTO	Localidade-tipo				Atlantic forest	26259.2	Ribeira de Iguape	ATLANTICO SUDESTE	VU	D2	5	ASE33	59.8174	87	Alto Ribeira de Iguape em Eldorado
716	460	Hypostominae	136	Pareiorhaphis steindachneri Miranda Ribeiro, 1918	Rio Itapocu, Estado de Santa Catarina, Brasil.	Rio Cubat╞o Norte, rio Itapocu, rio Itajaí-Açu e rio Cubat╞o Sul, Estado de	Rio Itapocu, em jaragua do Sul SC	ARCMAP	RR	OTO	-26.4467	-49.1247	26	26	48	s	49	7	29	1	PAB	PAB	Localidade-tipo	Pereira & Reis (2002).			Atlantic forest	285244	Southeastern Mata Atlantica	ATLANTICO SUL	EN	B1a, b i;iii	4	ASU10	3.60955	48	BAcia do Rio Itapucu
274	433	Hypostominae	136	Hypostomus topavae (Godoy, 1969)	Cachoeira de Emas, regi╞o da Topava, rio Mogi Guaçu, Estado de S╞o Paulo, Brasil.	Espécie conhecida apenas da localidade-tipo.	Cachoeira de Emas, SP	USBGN	RRT	NAM	-21.9333	-47.3667	21	56	0	s	47	22	0	11	NAM	OTO	Localidade-tipo				Atlantic forest	227825	Upper Parana	PARANA	EN	B1a, b i;iii	6	PRN09	2.52998	4	Córrego Paulicéia e bacia do Mogi Guaçu
304	432	Hypostominae	136	Hypostomus tietensis (Ihering, 1905)	Rio Tietê, Estado de S╞o Paulo, Brasil.	Bacia do Tietê.	Salesópolis	Species Link MZUSP 28167	RR	NAM	-23.5333	-45.85	0	0	0		0	0	0	9	OTO	OTO	Documentaç╞o prímária: Localidade-tipo.				Atlantic forest	270669	Upper Parana	PARANA	EN	B1a, b i;iii	5	PRN30	9.31808	37	Alto TietÛ
315	465	Hypostominae	136	Pareiorhina carrancas Bockmann & Ribeiro, 2003	Córrego Debaixo da Serra (tributário do córrego do Beijinho, margem esquerda do rio Grande no reservatório de Camargos), na base da Serra de Carrancas, Município de Carrancas, Estado de Mina	Córrego Debaixo da Serra, bacia do Grande, base da Serra de Carrancas, Muni		Buckup et al 2007	RR	NAM	-21.4444	-44.6025	21	26	40	s	44	36	9	9	OTO	OTO	Localidade-tipo				Atlantic forest	10965.5	Upper Parana	PARANA	EN	B1a, b i;iii	6	PRN36	0	13	Córrego Agua Limpa em Carrancas
320	444	Hypostominae	136	Isbruekerichthys calvus Jerep, Shibatta, Pereira & Oyakawa, 2006	Córrego Juruba, bacia do Tibagi, 23°34'44,6"S 51°22'12,6"W, Apucarana, Estado do Paraná, Brasil.	Conhecida do córrego Juruba e do ribeir╞o ╡gua dos Oito, afluentes rio Taqu		Buckup et al 2007	RR	NAM	-23.5791	-51.3702	23	34	45	s	51	22	13	3	OTO	OTO	Localidade-tipo				Atlantic forest	97881.2	Upper Parana	PARANA	EN	B1a, b i;iii	6	PRN41	0.1938	28	Corrego Juruba e Bacia do Taquara
225	100	Incertae	115	Astyanax turmalinensis Triques «et al»., 2003	Córrego Divis╞o, tributário da margem direita do rio Jequitinhonha, Vila de Peixe-Cru, 42°51'W 17"01'S, Municipio de Turmalina, Estado de Minas Gerais, Brasil.	Cabeceiras do alto Jequitinhonha.		Buckup et al 2007	RR	NAM	-17.1167	-42.45	17	7	0	s	42	27	0	8	PAB	PAB: Pequena correç╞o: 17 07 s 42 27 w	Localidade-tipo				CERRADO	18971.8	Northeastern Mata Atlantica	ATLANTICO LESTE	VU	D2	6	ALE11	0	100	Corrego Divisão e Bacia do Agua Suja
589	172	Incertae	115	Inpaichthys kerri Géry & Junk, 1977	Pequeno igarapé da bacia do igarapé Queimada (atualmente igarapé do Aeroporto), cerca de duas horas da cidade de Humboldt (nécleo Aripuan╞), na futura estrada para Juruena, alto rio Aripuan╞	Bacia do Aripuan╞ (bacia do Madeira).	Igarapé prox a Aripuan╞	Arcmap	RR	NAM	-10.1413	-59.343	10	8	29	s	59	20	35	14	PAB	PAB	Localidade-tipo				Amazonia	95821.9	Madeira Brazilian Shield	AMAZONICA	VU	D2	6	AMA54	0	73	Rio Natal
639	141	Incertae	115	Hyphessobrycon cachimbensis Travassos, 1964	Rio Cachimbo, Cachimbo, aeroporto da FAB, abaixo do salto, 9°22'S 54°55'W, Estado do Pará, Brasil.	Bacia do Tapajós.		Buckup et al 2007	RR	NAM	-9.3667	-54.9167	9	22	0	s	54	55	0	4	NAM	OTO	Localidade-tipo	Géry (1977).			Amazonia	65487.4	Tapajos - Juruena	AMAZONICA	VU	D2	6	AMA65	34.1233	99	Rio São Bento
640	174	Incertae	115	Jupiaba minor (Travassos, 1964)	Rio Cachimbo, abaixo do Salto, Aeroporto da FAB, Cachimbo, 9°22'S 54°55'W, Estado do Pará, Brasil.	Rio Cachimbo, bacia do Tapajós.		Buckup et al 2007	RR	OTO	-9.3667	-54.9167	9	22	0	s	54	55	0	4	NAM	OTO	Localidade-tipo	Zanata (1997).			Amazonia	65487.4	Tapajos - Juruena	AMAZONICA	VU	D2	6	AMA65	34.1233	99	Rio São Bento
641	189	Incertae	115	Moenkhausia newtoni Travassos, 1964	Rio Cachimbo, Cachimbo, Aeroporto da FAB, abaixo do Salto, 9°22'S 54°55'W, Estado do Pará, Brasil.	Alto rio Tapajós.		Buckup et al 2007	RR	NAM	-9.3667	-54.9167	9	22	0	s	54	55	0	4	NAM	OTO	Localidade-tipo				Amazonia	65487.4	Tapajos - Juruena	AMAZONICA	VU	D2	6	AMA65	34.1233	99	Rio São Bento
730	88	Incertae	115	Astyanax maculisquamis Garutti & Britski, 1997	Pontes e Lacerda, aproximadamente 15°12'S 59°22W, poça em córrego afluente do rio Guaporé (cerca de 7 km da ponte), bacia do Madeira, Estado do Mato Grosso, Brasil.	Cabeceiras do rio Guaporé (bacia do Madeira).		Buckup et al 2007	RR	NAM	-15.2	-59.3667	15	12	0	s	59	22	0	3	OTO	OTO	Localidade-tipo				Amazonia	61309.6	Guapore - Itenez	AMAZONICA	EN	B1a, b i;iii	6	AMA81	0	36	Bacia do Rio Branco, afluente do Guaporé
347	199	Incertae	115	Oligobrycon microstomus Eigenmann, 1915	Jacarei, rio Paraiba, Brasil.	Espécie conhecida apenas da localidade-tipo.	Jacareí	CIVI IBGE	RRT	NAM	-23.3053	-45.9658	23	18	19	s	45	57	57	9	OTO	OTO	Localidade-tipo		Estado de Conservaç╞o: Deficiente de dados.	Categoria de ameaça em listas regionais: Provavelm	Atlantic forest	49815	Paraiba do Sul	ATLANTICO SUDESTE	EN	B1a, b i;iii	6	ASE11	0	19	Cabeceiras do Rio Paraíba do Sul
715	128	Incertae	115	Deuterodon rosae (Steindachner, 1908)	Joinville, Estado de Santa Catarina, Brasil.	Bacia do Itapocu, Estado de Santa Catarina.	Rio Itapocuzinho ,Joinville, Santa Catarina	ARCMAP	RR	NAM	-26.2761	-49.16	26	16	34	s	49	9	36	1	PAB	PAB	Localidade-tipo				Atlantic forest	285244	Southeastern Mata Atlantica	ATLANTICO SUL	EN	B1a, b i;iii	4	ASU10	3.60955	48	BAcia do Rio Itapucu
660	180	Incertae	115	Knodus geryi Lima, Britski & Machado, 2004	Rio do Peixe, afluente do rio Cabaçal (bacia do alto Paraguai), fazenda Entre Rios, 14°55'S 58°27'W, Barra dos Bugres, Estado do Mato Grosso, Brasil.	Espécie conhecida apenas da localidade-tipo.		Buckup et al 2007	RRT	NAM	-14.9167	-58.45	14	55	0	s	58	27	0	3	OTO	OTO	Localidade-tipo	Lima et al. (2004).			CERRADO	57421.7	Paraguay	PARAGUAI	VU	D2	5	PRG12	0	90	Bacia do Rio Cabaçal
273	99	Incertae	115	Astyanax trierythropterus Godoy, 1970	Rio Mogi Guaçu, Cachoeira de Emas, a jusante da barragem, Estado de S╞o Paulo, Brasil.	Bacia do alto Paraná.	Cachoeira de Emas, SP	USBGN	RR	PAB	-21.9333	-47.3667	21	56	0	s	47	22	0	11	NAM	OTO	Localidade-tipo				Atlantic forest	227825	Upper Parana	PARANA	EN	B1a, b i;iii	6	PRN09	2.52998	4	Córrego Paulicéia e bacia do Mogi Guaçu
306	111	Incertae	115	Coptobrycon bilineatus (Ellis, 1911)	Alto da Serra, Estado de S╞o Paulo, Brasil.	Alto rio Tietê.	Mogi das cruzes, fishbase, alto da serra	ARCMAP	RR	NAM	-23.6452	-46.1728	23	38	43	s	46	10	22	9	OTO	OTO	Localidade-tipo	Géry (1966a).	Estado de Conservaç╞o: Em perigo.	Categoria de ameaça em listas regionais: Vulneráve	Atlantic forest	270669	Upper Parana	PARANA	EN	B1a, b i;iii	5	PRN30	9.31808	37	Alto TietÛ
307	143	Incertae	115	Hyphessobrycon duragenys Ellis, 1911	Mogi das Cruzes, rio Tietê, Estado de S╞o Paulo, Brasil.	Bacias do alto Tietê e alto Paraiba do Sul.	Mogi das cruzes, fishbase, alto da serra	ARCMAP	RR	NAM	-23.6452	-46.1728	23	38	43	s	46	10	22	9	OTO	OTO	Localidade-tipo	Eigenmann (1921).	Estado de Conservaç╞o: Criticamente em perigo.	Categoria de ameaça em listas regionais: Vulneráve	Atlantic forest	270669	Upper Parana	PARANA	EN	B1a, b i;iii	5	PRN30	9.31808	37	Alto TietÛ
303	201	Incertae	115	Piabina anhembi Silva & Kaefer, 2003	Rio Paraitinga na cachoeira da Porteira, 23°31'37"S 45°45'52"W, afluente do rio Tietê, Municipio de Salesópolis, Estado de S╞o Paulo, Brasil.	Espécie conhecida apenas da localidade-tipo.		Buckup et al 2007	RRT	NAM	-23.5269	-45.7644	23	31	37	s	45	45	52	9	OTO	OTO	Localidade-tipo				Atlantic forest	270669	Upper Parana	PARANA	EN	B1a, b i;iii	5	PRN30	9.31808	37	Alto TietÛ
309	92	Incertae	115	Astyanax paranae Eigenmann, 1914	Estado do Paraná [na localidade de Castro de acordo com Garutti & Britski, 2000: 81], Brasil.	Bacia do Paranapanema.	Rio Piraí no PE Caxambu em Castro, PR	ARCMAP	RR	OTO	-24.6758	-50.0008	24	40	33	s	50	0	3	2	OTO	OTO	Localidade-tipo				Atlantic forest	301799	Upper Parana	PARANA	EN	B1a, b i;iii	5	PRN31	32.4643	54	Rio Piraí no PE Caxambu
310	108	Incertae	115	Bryconamericus turiuba Langeani «et al»., 2005	Ribeir╞o Santa Bárbara (bacia do Tietê, alto Paraná), 20°57'59"S 50°1'6"W, Turiéba, Estado de S╞o Paulo, Brasil.	Bacia do alto Paraná.		Buckup et al 2007	RR	NAM	-20.9664	-50.0183	20	57	59	s	50	1	6	10	NAM	OTO	Localidade-tipo	Langeani et al. (2005).			Atlantic forest	78443.8	Upper Parana	PARANA	EN	B1a, b i;iii	6	PRN32	0	1	Ribeirão Santa Bárbara
158	135	Incertae	115	Hasemania nana (Lütken, 1875)	Lagoa Santa, Estado de Minas Gerais, Brasil.	Bacia do S╞o Francisco.	Lagoa Santa	USBGN	RR ?	?	-19.6333	-43.8833	19	38	0	s	43	53	0	8	PAB	PAB	Localidade-tipo	Lima & Gerhard (2001).			CERRADO	33440.5	S. Francisco	S├O FRANCISCO	VU	D2	6	SFR12	0	96	Lagoa Santa e afluentes do Rio das Velhas
440	170	Incertae	115	Hypobrycon leptorhynchus Silva & Malabarba, 1996	Rio Ibicui, aproximadamente 10 km de sua foz no rio Canoas, bacia do Uruguai, perto da Celulose Iguaçu, aproximadamente 27°33'S 51°12'W, Campos Novos, Estado de Santa Catarina, Brasil.	Alto Uruguai.		Buckup et al 2007	RR	NAM	-27.55	-51.2	27	33	0	s	51	12	0	1	PAB	PAB	Localidade-tipo				Atlantic forest	68221.6	Upper Uruguay	URUGUAI	EN	B1a, b i;iii	4	URU02	0.34411	17	Rio Ibicui
40	385	Loricariinae	136	Harttia depressa Rapp Py-Daniel & Oliveira, 2001	Rio Pitinga, bacia do rio Uatum╞, abaixo da represa Paranapanema Enterprise, Cachoeira 40 Ilhas, Estado do Amazonas, Brasil, 0053'20"S 59°34'24"W.	Bacia do Uatum╞.	Rio Pitinga, bacia do rio Uatum╞, AM	Buckup et al. 2007	RR	NAM	-0.8889	-59.5733	0	53	20	s	59	34	24	12	OTO	OTO	Localidade-tipo				Amazonia	32240.4	Amazonas Guiana Shield	AMAZONICA	VU	D2	6	AMA107	19.7129	93	Rio Pitinga
353	409	Loricariinae	136	Rineloricaria steindachneri (Regan, 1904)	Rio Preto, afluente do rio Paraíba [do Sul], Estado de Minas Gerais, Brasil.	Baixo Paraíba do Sul (rios Preto, Pomba, Muriaé, Grande e Dois Rios).	Rio Preto, afl. Paraíba do Sul, MG	Buckup et al. 2007	RRT	NAM/PAB	-21.25	-41.75	21	15	0	s	41	45	0	8	PAB	PAB: É RRD.	Localidade-tipo				Atlantic forest	13209.4	Paraiba do Sul	ATLANTICO SUDESTE	EN	B1a, b i;iii	6	ASE15	0	7	Rio Muriaé
418	340	Neoplecostominae	136	Neoplecostomus ribeirensis Langeani, 1990	Riacho afiuente do rio Bananal, km 7 da rodovia Biguá-Iguape (SP-222), Estado de S╞o Paulo, Brasil.	Riachos afiuentes do rio Ribeira de Iguape.	KM 7 da SP222	Arcmap	RR	OTO	-24.3266	-47.5049	24	19	36	s	47	30	18	2	OTO	OTO	Localidade-tipo			Categoria de ameaça em listas regionais: Provavelm	Atlantic forest	177784	Ribeira de Iguape	ATLANTICO SUDESTE	VU	D2	5	ASE31	76.9638	91	Afluentes do Rio Juquiá em Miracatu e Pedro de Toledo
278	339	Neoplecostominae	136	Neoplecostomus paranensis Langeani, 1990	Rio Cubat╞o, Fazenda Santa Carlota, Cajuru, Estado de S╞o Paulo, Brasil.	Riachos de cabeceira da bacia do alto Paraná.	Rio Cubat╞o em Cajuru	Arcmap	RR	OTO	-21.3237	-47.2503	21	19	25	s	47	15	1	11	NAM	OTO	Localidade-tipo			Categoria de ameaça em listas regionais: Provavelm	CERRADO	172497	Upper Parana	PARANA	EN	B1a, b i;iii	6	PRN10	0	5	Rio Cubatão e bacia do Pardo
299	6	Parodontidae	102	Parodon moreirai Ingenito & Buckup, 2005	Ribeir╞o do Salto, 22°26'55"S 45°20'47W, próximo a ponte de madeira em Salto, Municipio de Delfim Moreira, Estado de Minas Gerais, Brasil.	Bacia do Sapucai.	Ribeir╞o do Salto, Mun. Delfim Moreira, MG	Buckup et al. 2007	RR	NAM,PAB	-22.4486	-45.3464	22	26	55	s	45	20	47	3	OTO	PAB:Corrigir para 22°26'55"S 45°20'47W (loc. Tipo)	Localidade-tipo (MNRJ 23583).				Atlantic forest	24127.9	Upper Parana	PARANA	VU	D2	6	PRN29	91.9553	78	Rio Sapucaí
275	566	Pimelodidae	139	Pimelodus heraldoi Azpelicueta, 2001	Municlpio de Pirassununga, bacia do Mogi Guaçu em Emas, Estado de S╞o Paulo, Brasil.	Bacia do alto Paraná.	Cachoeira de Emas, SP	USBGN	RR	NAM	-21.9333	-47.3667	21	56	0	s	47	22	0	11	NAM	OTO	Localidade-tipo				Atlantic forest	227825	Upper Parana	PARANA	EN	B1a, b i;iii	6	PRN09	2.52998	4	Córrego Paulicéia e bacia do Mogi Guaçu
276	568	Pimelodidae	139	Pimelodus platicirris Borodin, 1927	Salto de Pirassununga, rio Mogi-Guaçu, Estado de S╞o Paulo, Brasil.	Bacia do Mogi-Guaçu (afluente do alto rio Paraná).	Rio Mogi-Guaçu, Pirassununga, S╞o Paulo	Buckup et al. 2007	RR	NAM	-21.9333	-47.3667	21	56	0	s	47	22	0	11	NAM	OTO	Localidade-tipo				Atlantic forest	227825	Upper Parana	PARANA	EN	B1a, b i;iii	6	PRN09	2.52998	4	Córrego Paulicéia e bacia do Mogi Guaçu
738	560	Pimelodidae	139	Aguarunichthys tocantinsensis Zuanon, Rapp Py-Daniel & Jégu, 1993	Drenagem do rio Tocantins, corredeiras acima de Marabá, Estado do Pará, Brasil.	Bacias do Juruá e do Tocantins.	Rio Tocantins a montante de marabá	Arcmap	RR	OTO	-5.3183	-49.0097	5	19	6	s	49	0	35	4	NAM	OTO	Localidade-tipo	Silvano el ai. (2001).	Estado de Conservaç╞o: Vulnerável.	Categoria de ameaça em listas regionais: Vulneráve	Amazonia	49272.2	Tocantins - Araguaia	TOCANTINS-ARAGUAIA	EN	B1a, b i;iii	4	TOAR67	0	43	Rio Tocantins em Marabá
348	779	Poeciliidae	251	Phallotorynus fasciolatus Henn, 1916	Uma milha ao Norte de Jacarei, bacia do Paraíba do Sul, Estado de S╞o Paulo, Brasil.	Bacia do alto Paraíba do Sul, e bacia do alto Tietê, em Paranapiacaba.	Drenagem proxima a Jacareí	Arcmap	RR	NAM	-23.3086	-45.935	23	18	31	s	45	56	6	9	OTO	OTO	Localidade-tipo	Lucinda et al. (2005).	Estado de Conservaç╞o: Em perigo.	Categoria de ameaça em listas regionais: Criticame	Atlantic forest	49815	Paraiba do Sul	ATLANTICO SUDESTE	EN	B1a, b i;iii	6	ASE11	0	19	Cabeceiras do Rio Paraíba do Sul
360	769	Poeciliidae	251	Phalloceros zsp. F		Bacia do médio Paraiba do Sul.	Bacia do médio Paraíba do Sul	MNRJ 23606	RR	NAM	-22.0333	-42.7833	22	2	0	s	42	47	0	8	PAB	Corrigir para 22 02 00 s 42 47 00 e (MNRJ 23606).	Lote de referência (MNRJ 23606).	Lucinda & Reis (2005).			Atlantic forest	19875	Paraiba do Sul	ATLANTICO SUDESTE	EN	B1a, b i;iii	6	ASE21	0	22	Bacia do RIo são Francisco, medio Paraíba do Sul
376	760	Poeciliidae	251	Cnesterodon omorgmatos Lucinda & Garavello, 2000	Rio das Torres, bacia do Iguaçu, Pinh╞o, Estado do Paraná, Brasil.	Espécie conhecida apenas da localidade-tipo.	Pinh╞o PR	CIVI IBGE	RRT	NAM	-25.6956	-51.6597	25	41	44	s	51	39	35	3	OTO	OTO	Localidade-tipo	Lucinda & Garavello (2000), Lucinda (2005a).		Categoria de ameaça em listas regionais: Vulneráve	Atlantic forest	114878	Iguassu	PARANA	EN	B1a, b i;iii	5	PRN60	3.34796	56	Bacia do Rio Pinhão
687	747	Rivulidae	250	Simpsonichthys suzarti Costa, 2004	Poça temporária perto de Canavieiras, várzea do rio Pardo, Estado da Bahia, Brasil.	Várzeas do rio Pardo, Estado da Bahia, Brasil.	Foz do Rio Prado, N de Canavieira	Arcmap	RR	NAM	-15.75	-39	15	45	0	s	39	0	0	8	PAB	PAB: Corrigir para 15 45 00 s 39 00 00 w (localidade tipo)	Localidade-tipo				Atlantic forest	100075	Northeastern Mata Atlantica	ATLANTICO LESTE	EN	B1a, b i;iii	5	ALE44	1.23426	24	Foz do Rio Pardo e Rio Salsa
721	626	Rivulidae	250	Campellolebias chrysolineatus Costa, Lacerda & Brasil, 1989	Poça temporária em margem de floresta, 26°25'S 48°38'W, Municipio de Araquari, Estado de Santa Catarina, Brasil.	Bacias costeiras do norte do Estado de Santa Catarina, entre a bala de Guar		Buckup et al 2007	RR	NAM	-26.4167	-48.6333	26	25	0	s	48	38	0	1	PAB	PAB	Localidade-tipo	Costa (1995c).	Estado de Conservaç╞o: Vulnerável.		Atlantic Forest	51839.8	Southeastern Mata Atlantica	ATLANTICO SUL	EN	B1a, b i;iii	5	ASU12	16.092	56	Bacias Costeiras em Joinville e Araquari
722	691	Rivulidae	250	Rivulus haraldsiolii Berkenkamp, 1984	Baixo rio Itapocu, Estado de Santa Catarina, Brasil.	Bacias da planície costeira entre os rio Cubat╞o e Tijucas, no norte do Est	ZMH 6530	Costa 2007	RR	PAB	-26.5	-48.6667	26	30	0	s	48	40	0	0		PAB: INSERIR ESTA ESP╙CIE	Localidade-tipo				Atlantic forest	51839.8	Southeastern Mata Atlantica	ATLANTICO SUL	EN	B1a, b i;iii	5	ASU12	16.092	56	Bacias Costeiras em Joinville e Araquari
723	696	Rivulidae	250	Rivulus luelingi Seegers, 1984	Joinville, Estado de Santa Catarina, Brasil.	Bacias costeiras dos estados do Paraná e Santa Catarina.	Joinville	UFRJ 6352	RR	OTO	-26.5042	-48.6458	26	30	15	s	48	38	45	1	PAB	PAB: aperfeiçoar para 26 30 15 s 48 38 45 w (UFRJ 6352)	Localidade-tipo	Costa (1991 c).			Atlantic forest	51839.8	Southeastern Mata Atlantica	ATLANTICO SUL	EN	B1a, b i;iii	5	ASU12	16.092	56	Bacias Costeiras em Joinville e Araquari
286	743	Rivulidae	250	Simpsonichthys santanae (Shibata & Garavello, 1992)	Margem direita do ribeir╞o Santa na, a 750 m da divisa do Distrito Federal com Goiás, Distrito Federal, Brasil.	Bacia do alto Paraná, Brasil.	ribeir╞o Santana, proximo divisa GO DF	Arcmap	RR	NAM	-16.0406	-47.7655	16	2	26	s	47	45	56	5	NAM	OTO	Localidade-tipo,		Estado de Conservaç╞o: Em perigo.		CERRADO	166429	Upper Parana	PARANA	EN	B1a, b i;iii	6	PRN16	42.4343	47	Ribeirão Santana e Rio São Bartolomeu
289	690	Rivulidae	250	Rivulus egens Costa, 2005	Estrada BR-060, rio S╞o Domingos, drenagem do alto Verde, bacia do Paraná, 19°19'26,0"S 53°21'6,8"W, Municipio de Camapu╞, Estado de Mato Grosso do Sul, Brasil.	Rio S╞o Domingos, na drenagem do alto Verde, bacia do Paraná, Estado de Mat		Buckup et al 2007	RR	NAM	-19.3239	-53.3519	19	19	26	s	53	21	7	3	OTO	OTO	Localidade-tipo				CERRADO	25600.2	Upper Parana	PARANA	EN	B1a, b i;iii	6	PRN19	0	0	Rio São Domingos, Bacia do Paraná
290	699	Rivulidae	250	Rivulus pinima Costa, 1989	Município de Rio Verde, 37 km a leste de Jataí, BR-364, Estado de Goiás, Brasil.	Alto rio Claro, bacia do Paraná.	Drenagem cruzando BR 364 entre Jatai e Rio Verde, alto Rio Claro	Arcmap	RR	NAM	-17.825	-51.3036	17	49	30	s	51	18	13	3	OTO	OTO	Localidade-tipo				CERRADO	261034	Upper Parana	PARANA	EN	B1a, b i;iii	6	PRN20	0	0	Rio Doce, Bacia do Alto Rio Claro
292	701	Rivulidae	250	Rivulus rutilicaudus Costa, 2005	Várzea do rio Verde, bacia do Paraná, estrada BR-060, 18°22'31,5S 52°00'59,5"W, Municipio de Serranópolis, Estado de Goiás, Brasil.	Drenagem do rio Verde, na bacia do Paraná.		Buckup et al 2007	RR	NAM	-18.3754	-52.0165	18	22	32	s	52	0	60	3	OTO	OTO	Localidade-tipo				CERRADO	150350	Upper Parana	PARANA	EN	B1a, b i;iii	6	PRN22	0.0762102	0	Rio Verde, bacia do Paraná
295	738	Rivulidae	250	Simpsonichthys parallelus Costa, 2000	Alagado sazonal na várzea do rio Formoso, tributário do rio Correntes, drenagem do Paranaíba, bacia do Paraná, Parque Nacional das Emas, Estado de Goiás, Brasil.	Bacia do alto Paraná.	Rio Formoso, após ponte, no sentido sede jacuba	CN com pess	RR	NAM	-18.258	-52.8841	18	15	29	s	52	53	3	3	OTO	OTO	Localidade-tipo		Estado de Conservaç╞o: Vulnerável.		CERRADO	120251	Upper Parana	PARANA	EN	B1a, b i;iii	6	PRN25	59.8151	60	Rio Formoso
152	638	Rivulidae	250	Cynolebias perforatus Costa & Brasil, 1991	Januária. Estado de Minas Gerais. Brasil.	Bacia do S╞o Francisco.	januária( mas tb S╞o francisco, travess╞o, itacarambi)	Costa 2001	RR	NAM	-15.5	-44.3333	15	30	0	s	44	20	0	5	NAM	OTO	Localidade-tipo	Costa (2001).			Caatinga	238613	S. Francisco	S├O FRANCISCO	EN	B1a, b i;iii	5	SFR06	18.2152	43	Rio São Franciscoe afluentes, em Januária
197	735	Rivulidae	250	Simpsonichthys nielseni Costa, 2005	Poça temporária em Pirapora, planicie de inundaç╞o do rio S╞o Francisco, 17°21'59,6"S 44°56'32,3"W, altitude 500 m, Estado de Mínas Gerais, Brasil.	Espécie conhecida apenas da localdiade-tipo.		Buckup et al 2007	RRT	NAM	-17.3666	-44.9423	17	21	60	s	44	56	32	5	NAM	OTO	Localidade-tipo				CERRADO	70059.4	S. Francisco	S├O FRANCISCO	VU	D2	6	SFR34	0	81	Rio São Francisco acima da Foz do Rio das Velhas
550	720	Rivulidae	250	Simpsonichthys flammeus (Costa, 1989)	Arraias, Estado do Tocantins, Brasil.	Bacia do Tocantins.	Brejo na confluencia do Bezeerra com Paranan	arcmap	RR	OTO	-13.2603	-47.3881	13	15	37	s	47	23	17	5	NAM	OTO	Localidade-tipo		Estado de Conservaç╞o: Em perigo.		CERRADO	198153	Tocantins - Araguaia	TOCANTINS-ARAGUAIA	VU	D2	5	TOAR56	11.4315	91	Rio Bezerra, Bacia do Paranan
417	289	Sarcoglanidinae	134	Microcambeva ribeirae Costa, Lima & Bizerril, 2004	Rio S╞o Lourencinho, Bairro S╞o Lourenço, Municipio Pedro de Toledo, Estado de S╞o Paulo, Brasil.	Rio Ribeira de Iguape.	Rio S╞o lourencinho	Arcmap	RR	NAM	-24.1533	-47.1328	24	9	12	s	47	7	58	2	OTO	OTO	Localidade-tipo				Atlantic forest	34225.1	Ribeira de Iguape	ATLANTICO SUDESTE	VU	D2	5	ASE31	76.9638	91	Afluentes do Rio Juquiá em Miracatu e Pedro de Toledo
159	590	Sternopygidae	146	Eigenmannia microstoma (Reinhardt, 1852)	Lagoa Santa, bacia do rio das Velhas, Estado de Minas Gerais, Brasil.	Bacia do S╞o Francisco.	Lagoa Santa	USBGN	RR	NAM	-19.6333	-43.8833	19	38	0	s	43	53	0	8	PAB	PAB	Localidade-tipo (MZUSP 39472).	Campos-da-Paz (1997).			CERRADO	33440.5	S. Francisco	S├O FRANCISCO	VU	D2	6	SFR12	0	96	Lagoa Santa e afluentes do Rio das Velhas
224	251	Trichomycterinae	133	Trichomycterus itacambirussu Triques & Vono, 2004	Córrego Cabral, drenagem do Itacambiruçu, bacia do Jequitinhonha, 16'33'S 42'45'W, Municipio de Gr╞o Mongol, Estado de Minas Gerais, Brasil.	Rio Itacambiruçu, bacia do Jequitinhonha.		Buckup et al 2007	RR	NAM	-16.55	-42.75	16	33	0	s	42	45	0	8	PAB	PAB	Localidade-tipo				CERRADO	508677	Northeastern Mata Atlantica	ATLANTICO LESTE	VU	B1a, b i;iii	4	ALE10	6.65234	57	Rio Itacambiruçu
350	250	Trichomycterinae	133	Trichomycterus immaculatus (Eigenmann & Eigenmann, 1889)	Juiz de Fora, rio Paraibuna, 21°40'S 43°25'W, Estado de Minas Gerais, Brasil.	Espécie conhecida apenas da localidade-tipo.		Buckup et al 2007	RRT	NAM	-21.6667	-43.4167	21	40	0	s	43	25	0	8	PAB	PAB	Localidade-tipo				Atlantic forest	126749	Paraiba do Sul	ATLANTICO SUDESTE	EN	B1a, b i;iii	5	ASE13	0.293104	23	Rio PAraibuna, em Juiz de Fora
717	263	Trichomycterinae	133	Trichomycterus nigricans Valenciennes, 1846	Rio Itapocu, 26°10'S 48'35'W, Estado de Santa Catarina, Brasil.	Espécie conhecida apenas da localidade-tipo.	Coord fornecida em Buckup et al 2007 errada, usei Rio Itapocu	Arcmap	RRT	NAM	-26.5161	-48.8031	26	30	58	s	48	48	11	1	PAB	PAB	Localidade-tipo				Atlantic forest	285244	Southeastern Mata Atlantica	ATLANTICO SUL	EN	B1a, b i;iii	4	ASU10	3.60955	48	BAcia do Rio Itapucu
269	273	Trichomycterinae	133	Trichomycterus reinhardti (Eigenmann, 1917)	Rio Itabira, afluente do rio das Velhas, 20°OO'S 47°00'W, Estado de Minas Gerais, Brasil.	Espécie conhecida apenas da localidade-tipo.		Buckup et al 2007	RRT	NAM	-20	-47	20	0	0	s	47	0	0	5	NAM	OTO	Localidade-tipo				CERRADO	167164	Upper Parana	PARANA	VU	D2	6	PRN06	8.75795	100	Alto Rio Araguari
300	265	Trichomycterinae	133	Trichomycterus paolence (Eigenmann, 1917)	Alto da Serra, 23°30'S 46°10'W, Mogi das Cruzes, rio Tietê, bacia do Paraná, Estado de S╞o Paulo, Brasil.	Espécie conhecida apenas da localidade-tipo.		Buckup et al 2007	RRT	NAM	-23.3858	-46.5655	0	0	0		0	0	0	9	OTO	OTO	Localidade-tipo		Estado de Conservaç╞o: Vulnerável.	Categoria de ameaça em listas regionais: Vulneráve	Atlantic forest	270669	Upper Parana	PARANA	EN	B1a, b i;iii	5	PRN30	9.31808	37	Alto TietÛ
314	268	Trichomycterinae	133	Trichomycterus pauciradiatus Alencar & Costa, 2006	Córrego Debaixo da Serra, 21°26'40"S 44°36'09"W, tributário do córrego ╡gua Limpa, Municlplo de Carrancas, Estado de Minas Gerais, Brasil.	Espécie conhecida apenas da localidade-tipo.		Buckup et al 2007	RRT	NAM	-21.4444	-44.6025	21	26	40	s	44	36	9	9	OTO	OTO	Localidade-tipo				Atlantic forest	10965.5	Upper Parana	PARANA	EN	B1a, b i;iii	6	PRN36	0	13	Córrego Agua Limpa em Carrancas
368	259	Trichomycterinae	133	Trichomycterus mboycy Wosiacki & Garavello, 2004	Foz do rio Jord╞o, tributário do rio Iguaçu (bacia do Paraná), Reservatório do Jord╞o, Municipio de Foz do Rio Jord╞o, Estado do Paraná, Brasil, 25'45'S e 52'10'W.	Médio Iguaçu.	Foz rio Jord╞o, trib rio Iguaçu, PA	Buckup et al 2007	RR	NAM	-25.75	-52.1667	25	45	0	s	52	10	0	3	OTO	OTO	Localidade-tipo				Atlantic forest	70512.4	Iguassu	PARANA	EN	B1a, b i;iii	5	PRN56	19.4056	20	Foz do Rio Jordão
369	266	Trichomycterinae	133	Trichomycterus papilliferus Wosiacki & Garavello, 2004	Foz do rio Jord╞o, tributário do rio Iguaçu (bacia do Paraná), Reservatório do Jord╞o, 25°45'S 52°10'W, Municipio de Foz do Rio Jord╞o, Estado do Paraná, Brasil.	Espécie conhecida apenas da localidade-tipo.		Buckup et al 2007	RRT	NAM	-25.75	-52.1667	25	45	0	s	52	10	0	3	OTO	OTO	Localidade-tipo				Atlantic forest	70512.4	Iguassu	PARANA	EN	B1a, b i;iii	5	PRN56	19.4056	20	Foz do Rio Jordão
370	269	Trichomycterinae	133	Trichomycterus plumbeus Wosiacki & Garavello, 2004	Foz do rio Jord╞o, tributário do rio Iguaçu (bacia do rio Paraná), Reservatório do Jord╞o, 25°45'S 52°10'W, Municipio de Foz do Rio Jord╞o, Estado do Paraná, Brasil.	Espécie conhecida apenas da localidade-lipo.		Buckup et al 2007	RRT	NAM	-25.75	-52.1667	25	45	0	s	52	10	0	3	OTO	OTO	Localidade-tipo				Atlantic forest	70512.4	Iguassu	PARANA	EN	B1a, b i;iii	5	PRN56	19.4056	20	Foz do Rio Jordão
371	276	Trichomycterinae	133	Trichomycterus taroba Wosiacki & Garavello, 2004	Foz do rio Jord╞o, tributário do rio Iguaçu (bacia do Paraná), Reservatório do Jord╞o, Municlpio de Foz do Rio Jord╞o, 25°45'S 52°10'W, Estado do Paraná, Brasil.	Espécie conhecida apenas da localidade-tipo.		Buckup et al 2007	RRT	NAM	-25.75	-52.1667	25	45	0	s	52	10	0	3	OTO	OTO	Localidade-tipo				Atlantic forest	70512.4	Iguassu	PARANA	EN	B1a, b i;iii	5	PRN56	19.4056	20	Foz do Rio Jordão
372	275	Trichomycterinae	133	Trichomycterus stawiarski (Miranda Ribeiro, 1968)	Pequeno córrego pertencente à bacia do Paraná, localidade de Bituruna, 26'10'S 51'30'W, Estado do Paraná, Brasil.	Médio rio Iguaçu.	Córrego bacia do Paraná, Ibituruna, PR	Buckup et al. 2007	RR	NAM	-26.1667	-51.5	26	10	0	s	51	30	0	1	PAB	PAB	Localidade-tipo				Atlantic forest	159678	Iguassu	PARANA	EN	B1a, b i;iii	5	PRN57	19.4832	40	Bacia do Iguaçu em Ibituruna
172	252	Trichomycterinae	133	Trichomycterus itacarambiensis Trajano & de Pinna, 1996	Caverna Olhos d'╡guas, 15°06'06"S 44°09'30"W, Municipio de Itacarambl, Estado de Minas Gerais, Brasil.	Espécie conhecida apenas da localidade-tipo.		Buckup et al 2007	RRT	NAM	-15.1017	-44.1583	15	6	6	s	44	9	30	5	NAM	OTO	Localidade-tipo		Estado de Conservaç╞o: Vulnerável.		CERRADO	29881.2	S. Francisco	S├O FRANCISCO	EN	B1a, b i;iii	6	SFR17	72.3115	8	Afluentes do São Francisco em Itacarambi
201	277	Trichomycterinae	133	Trichomycterus trefauti Wosiacki, 2004	Riacho Andrequlcé, tributário do rio Paraéna, este tributário do rio das Velhas (bacia do S╞o Francisco), 18°30'S 43°30'W, Municlpio de Trinta Réis, Estado de Minas Gerais, Brasil.	Espécie conhecida apenas da localidade-tipo.		Buckup et al 2007	RRT	NAM	-18.6125	-43.5617	18	36	45	s	43	33	42	8	PAB	PAB: Corrigir para 18 36 45 s 43 33 42 w (Juscelino Kubitschek e rio Paraénas. Obs: A coordenada publicada originalmente cai na bacia do Jequitinhona!)	Localidade-tipo				Atlantic forest	175803	S. Francisco	S├O FRANCISCO	EN	B1a, b i;iii	6	SFR38	4.35684	100	Rio Para·na
801	785	Anablepidae	252	Jenynsia unitaenia Ghedotti & Weitzman, 1995	Rio Faxinalzinho, em M╞e dos Homens, próximo a Praia Grande, Estado de Santa Catarina, Brasil.	Bacias costeiras do Estado de Santa Catarina e do Estado do Rio Grande do S		Species Link MZUSP 47615	RR	NAM	-29.1666	-49.95	0	0	0		0	0	0	1	PAB	PAB	Localidade-tipo				Atlantic forest	24471.8	Tramandai - Mampituba	ATLANTICO SUL	EN	B1a, b i;iii	6	ASU45	23.2712	33	Bacias dos rios Faxinalzinho e Mampituba
446	493	Ancistrinae	137	Hemiancistrus meizospilos Cardoso & Silva, 2004	Rio Chapecó, Coronel Freitas, bacia do Uruguai, Estado de Santa Catarina, Brasil.	Espécie conhecida apenas da localidade-tipo.	Coronel Freitas	CIVI IBGE	RRT	NAM	-26.9114	-52.7031	26	54	41	s	52	42	11	1	PAB	PAB	Localidade-tipo				Atlantic forest	23534.3	Upper Uruguay	URUGUAI	EN	B1a, b i;iii	6	URU08	0	6	Rio Chapeco, afluente em Manuel Freitas
466	27	Anostomidae	104	Schizodon australis Garavello, 1994	Rio Uruguai, Porto de Santo Izidro, Municipio de S╞o Nicolau, Estado do Rio Grande do Sul, Brasil.	Bacia do Uruguai.	Trecho do Rio Uruguai em sao nicolau, RS	ARCMAP	RR	OTO	-28.0617	-55.4127	28	3	42	s	55	24	46	1	PAB	PAB	l.ocalidade-tipo.				Atlantic forest	73401.7	Lower Uruguay	URUGUAI	EN	B1a, b i;iii	4	URU13	0	13	Rio Uruguai em Santo Izidro
714	585	Auchenipteridae	141	Tatia boemia Koch & Reis, 1996	Rio Pelotas na estrada Anita Garibaldi a Pinhal da Serra, Esmeralda, Estado do Rio Grande do Sul, Brasil.	Espécie conhecida apenas da localidade-tipo.	RioPelotas em Esmeralda	ARCMAP	RRT	NAM	-27.85	-51.1143	27	51	0	s	51	6	52	1	PAB	PAB	Localidade-tipo	Soares-Porto (1998).	Estado de Conservaç╞o: Vulnerável.	Categoria de ameaça em listas regionais: Vulneráve	Atlantic forest	121326	Upper Uruguay	URUGUAI	VU	D2	5	URU22	0	85	Rio Pelotas em Esmeralda
237	50	Bryconinae	111	Brycon zsp. 3		Bacia do Jequitinhonha.	Baciado rio Jequitinhonha	Buckup et al. 2007	RR	NAM	-16.7567	-41.9917	16	45	24	s	41	59	30	8	PAB	PAB: Corrigir para 16 45 24 S 41 59 30 w (Jequitinhonha, logo abaixo de Itira)	Bibliográfica I Lote de referência (MZUSP 53803).	Lima (2001).			Atlantic forest	6174.86	Northeastern Mata Atlantica	ATLANTICO LESTE	CR	B1a, b i;iii	6	ALE18	0	40	Rio Jequitinhonha, abaixo foz do Araçuaí
671	44	Bryconinae	111	Brycon ferox Steindachner, 1877	Rio Mucuri, Brasil.	Rio Mucuri.	Rio Mucuri	Buckup et al. 2007	RR	NAM	-17.7	-40.9667	17	42	0	s	40	58	0	8	PAB	PAB	Localidade-tipo	Lima (2001).		Categoria de ameaça em listas regionais: Criticame	Atlantic forest	40112.3	Northeastern Mata Atlantica	ATLANTICO LESTE	EN	B1a, b i;iii	6	ALE37	0	9	Afluente do Mucuri, Carlos Chagas
672	48	Bryconinae	111	Brycon vermelha Lima & Castro, 1999	Rio Mucuri, aproximadamente 9 km a oeste da vila de Presidente Pena, numa estrada de terra na Fazenda Gavi╞o, 17°42'S 40°58'W, Município de Carlos Chagas, Estado de Minas Gerais, Brasil.	Bacia do Mucuri.	Rio Mucuri, Faz. Gavi╞o, Mun. Carlos Chagas, MG	Buckup et al 2007	RR	NAM	-17.7	-40.9667	17	42	0	s	40	58	0	8	PAB	PAB	Localidade-tipo	Lima (2001).	Estado de Conservaç╞o: Vulnerável.		Atlantic forest	40112.3	Northeastern Mata Atlantica	ATLANTICO LESTE	EN	B1a, b i;iii	6	ALE37	0	9	Afluente do Mucuri, Carlos Chagas
235	47	Bryconinae	111	Brycon opalinus (Cuvier, 1819)	Rio de Janeiro, Brasil.	Bacia do Paraiba do Sul.	Bacia do Paraíba do Sul, RJ	Buckup et al. 2007	RR	NAM	-19.0822	-43.4313	0	0	0		0	0	0	8	PAB	PAB: Corrigir para -19.082222 -43.431389 (MZUSP 75309)	Localidade-tipo	Lima (2001).	Estado de Conservaç╞o: Vuinerável.		Atlantic forest	32849.4	Northeastern Mata Atlantica	ATLANTICO SUDESTE	EN	B1a, b i;iii	5	ASE02	25.756	33	Rio Santo Antonio
461	329	Callichthyidae	134	Corydoras steindachneri Isbrücker & Nijssen, 1973	Paranaguá, 25°32'S 48°36'W, Estado do Paraná, Brasil.	Bacia de Paranaguá.	Paranaguá, PR	Buckup et al. 2007	RR	NAM	-25.5333	-48.6	25	32	0	s	48	36	0	2	OTO	OTO	Localidade-tipo	Isbrücker & Nijssen (1973), Nijssen & Isbrücker (1		Categoria de ameaça em listas regionais: Deficient	Atlantic forest	85533.6	Southeastern Mata Atlantica	ATLANTICO SUL	VU	D2	5	ASU07	32.0489	88	Bacias Costeiras em Paranaguá
802	334	Callichthyidae	134	Scleromystax salmacis Britto & Reis, 2005	Arroio Molha Coco em Vila Rosa, cerca de 5,5 km a noroeste de Praia Grande, 29°10'14"S 49°58'53'W, Estado de Santa Catarina, Brasil.	Bacias de dos rios Mampituba e Araranguá no sul de Santa Cata ri na e bacia		Buckup et al 2007	RR	OTO	-29.1706	-49.9814	29	10	14	s	49	58	53	1	PAB	PAB	Localidade-tipo				Atlantic forest	24471.8	Tramandai - Mampituba	ATLANTICO SUL	EN	B1a, b i;iii	6	ASU45	23.2712	33	Bacias dos rios Faxinalzinho e Mampituba
271	303	Callichthyidae	134	Aspidoras lakoi Miranda Ribeiro, 1949	Pequeno córrego na floresta do Grot╞o, Fazenda da Cachoeira, Municipio de Passos, Estado de Minas Gerais, Brasil.	Bacia do Paraná.	Passos	Cent mun	RR	NAM	-20.7278	-46.621	0	0	0		0	0	0	9	OTO	OTO	Localidade-tipo	Miranda Ribeiro (1949), Miranda Ribeiro (1959), Ni			CERRADO	43053.2	Upper Parana	PARANA	EN	B1a, b i;iii	6	PRN08	0	0	Ribeirão da Bocaina, em Passos
529	312	Callichthyidae	134	Aspidoras taurus Lima & Britto, 2001	Municipio de Alto Garças, fazenda Cabeceira do Itiquira, próximo a rodovia BR-364, rio Itiquira, bacia do Paraguai, 16°56'S 53°32'W, Estado de Mato Grosso, Brasil.	Bacia do Paraguai.		Buckup et al 2007	RR	NAM	-16.9333	-53.5333	16	56	0	s	53	32	0	3	OTO	OTO	Localidade-tipo	Uma & Britto (2001).			CERRADO	12313.2	Tocantins - Araguaia	TOCANTINS-ARAGUAIA	EN	B1a, b i;iii	5	TOAR40	0	25	Alto Garças
772	57	Cheirodontinae	111	Heterocheirodon jacuiensis Malabarba & Bertaco, 1999	Lagoa na margem esquerda do rio Jacui, junto a BR 290, Cachoeira do Sul, Estado do Rio Grande do Sul, Brasil.	Bacia da laguna dos Patos.	Rio Jacuí em Cachoeira do Sul	Arcmap	RR	NAM	-29.9994	-53.0199	29	59	58	s	53	1	12	1	PAB	PAB	Localidade-tipo				Pampas	34148.1	Laguna dos Patos	ATLANTICO SUL	EN	B1a, b i;iii	5	ASU26	0	15	Rio Jacuí
107	807	Cichlidae	387	Cichla melaniae Kullander & Ferreira, 2006	Rio Xingu, na Cachoeira do Espelho, 3°48'S 52°32'W, Estado do Pará, Brasil.	Distribuiç╞o: Bacia do baixo xingé.		Buckup et al 2007	RR	OTO	-3.8	-52.5333	3	48	0	s	52	32	0	4	NAM	OTO	Localidade-tipo				Amazonia	79259.1	Xingu	AMAZONICA	VU	D2	5	AMA42	50.2661	80	Rio Xingu, Cachoeira do Espelho
108	823	Cichlidae	387	Crenicichla percna Kullander, 1991	Cachoeira do Espelho, bacia do Xingu, Estado do Pará, Brasil.	Bacia do Xingu.		Buckup et al 2007, ver Cichla	RR	OTO	-3.8	-52.5333	3	48	0	s	52	32	0	4	NAM	OTO	Localidade-tipo				Amazonia	79259.1	Xingu	AMAZONICA	VU	D2	5	AMA42	50.2661	80	Rio Xingu, Cachoeira do Espelho
736	855	Cichlidae	387	Crenicara latruncularium Kullander & Staeck, 1990	igarapé do 13, na estrada Palheta Guajará Mirim, drenagem do Mamoré, Estado de Rondônia, Brasil.	Bacias do Guaporé e do Mamoré.	Vila bela de Santissima Trindade, MT		RR	OTO	-15.0106	-59.9472	15	0	38	s	59	56	50	0		PAB: 15 00 38 s 59 56 50 w (Vila Bela da Santíssima Trindade)	Localidade-tipo				Amazonia	40624.9	Guapore - Itenez	AMAZONICA	VU	D2	6	AMA83	22.9274	87	Igarapé do 13
463	828	Cichlidae	387	Crenicichla tingui Kullander & Lucena, 2006	Rio Jacarel, km 18 da rodovia BR-277, 25°35'S 48°43'W, limite dos municlpios de paranaguá e Morretes, Estado do Paraná, Brasil.	Bacias da baía de paranaguá, da baía de Babitonga e do Itapocu.		Buckup et al 2007	RR	NAM	-25.5833	-48.7167	25	35	0	s	48	43	0	2	OTO	OTO	Localidade-tipo				Atlantic forest	85533.6	Southeastern Mata Atlantica	ATLANTICO SUL	VU	D2	5	ASU07	32.0489	88	Bacias Costeiras em Paranaguá
763	818	Cichlidae	387	Crenicichla maculata Kullander & Lucena, 2006	Rio Pinheiro, Maquiné, Estado do Rio Grande do Sul, Brasil.	Bacias costeiras do Estado de Santa Catarina e bacias das lagoas costeiras	Alto Rio Maquiné, RS	ARCMAP	RR	NAM	-29.5294	-50.2315	29	31	46	s	50	13	54	1	PAB	PAB	Localidade-tipo				Atlantic forest	56022.2	Laguna dos Patos	ATLANTICO SUL	EN	B1a, b i;iii	6	ASU22	10.3487	72	Rio Maquiné
799	811	Cichlidae	387	Crenicichla gaucho Lucena & Kullander, 1992	Arroio Passo do Alto, próximo a Mineral, Municipio de S╞o Nicolau, Estado do Rio Grande do Sul, Brasil.	Rio Comandai, rio Ijuí, rio Piratinim e rio Canoas, Brasil.	Rio Piratinim em S╞o Nicolau	Arcmap	RRT	OTO	-28.21	-55.2828	28	12	36	s	55	16	58	1	PAB	PAB: Sp é RRT.	Localidade-tipo				Pampas	16165.6	Lower Uruguay	URUGUAI	EN	B1a, b i;iii	6	URU30	0	14	Rio Piratini em São Nicolau
471	827	Cichlidae	387	Crenicichla tendybaguassu Lucena & Kullander, 1992	Rio Piratinim, Estado do Rio Grande do Sul, Brasil.	Rio Piratinim, Brasil; bacia do Uruguai, Brasil e Uruguai.	Rio Piratinim.OBS rever coordenada,pois 22 47 47 54 55 15 cai no rio uruguai	ARCMAP	RR	OTO	-28.21	-55.2828	22	47	47	s	54	55	15	3	OTO	OTO	Localidade-tipo				Pampas	386406	Lower Uruguay	URUGUAI	EN	B1a, b i;iii	6	URU30	0	14	Rio Piratini em São Nicolau
233	37	Crenuchidae	107	Characidium timbuiense Travassos, 1946	Corrego Valsungana, elevaç╞o de 785 m, tributário de rio Timbui, próximo a Santa Teresa, Municipio de Santa Toresa, Estado do Esplrito Santo, Brasil.	Bacias costeiras do Estado do Espirito Santo.	Sta Teresa ES	ARCMAP	RR ?	PAB	-19.975	-40.5478	19	58	30	s	40	32	52	8	PAB	PAB: Corrigir para 19 58 30 S 40 32 52 W (MNRJ 22414)	Localidade-tipo				Atlantic forest	29707.4	Northeastern Mata Atlantica	ATLANTICO SUDESTE	EN	B1a, b i;iii	5	ASE01	6.4377	40	Rio Fundão
596	31	Crenuchidae	107	Characidium grajahuense Travassos, 1944	Riacho que abastece a caixa do Grajaé, Rio de Janeiro, Estado do Rio de Janeiro, Brasil.	Bacias costeiras ao norte e oeste da cidade do Rio de Janeiro.	Localidade-tipo	Buckup(com.pes.)	RR	PAB	-22.9294	-43.2667	22	55	46	s	43	15	60	8	PAB	PAB	Localidade-tipo	Buckup el ai. (2000).	Estado de Conservaç╞o: Criticamente em perigo.	Categoria de ameaça em listas regionais: Criticame	Atlantic forest	21375	Fluminense	ATLANTICO SUDESTE	EN	B1a, b i;iii	5	ASE40	20.9807	34	Rios costeiros no Rio de JAneiro
597	33	Crenuchidae	107	Characidium macrolepidotum (Peters, 1868)	Rio de Janeiro, Brasil.	Espécie conhecida apenas da localidade-tipo.	Rio de Janeiro Floresta da Tijuca	Arcmap	RRT	PAB	-22.9475	-43.2311	22	56	51	s	43	13	52	8	PAB	Espécie RRD	Localidade-tipo	Géry et al. (2001).			Atlantic forest	21375	Fluminense	ATLANTICO SUDESTE	EN	B1a, b i;iii	5	ASE40	20.9807	34	Rios costeiros no Rio de JAneiro
711	38	Crenuchidae	107	Characidium vestigipinne Buckup & Hahn, 2000	Cabeceiras do rio Caraguatá, aproximadamente 28°9'S 52°18'W, aproximadamente 200 m da rodovia RS-13S, Fazenda Dückel, Municipio de Coxilha, Estado do Rio Grande do Sul, Brasil.	Espécie conhecida apenas da localidade-tipo.		Buckup et al 2007	RR	PAB	-28.15	-52.3	28	9	0	s	52	18	0	1	PAB	PAB	Localidade-tipo		Estado de Conservaç╞o: Criticamente em perigo.	Categoria de ameaça em listas regionais: Vulneráve	Atlantic forest	50316.5	Upper Uruguay	URUGUAI	EN	B1a, b i;iii	6	URU19	3.10288	1	Cabeceiras do Rio Caraguatá
356	512	Delturinae	137	Delturus parahybae Eigenmann & Eigenmann, 1889	Rio Paraiba do Sul, Brasil.	Bacia do Paraiba do Sul.	Rio Paraiba do Sul RJ	Buckup et al 2007	RR	NAM	-22.4625	-43.8225	22	27	45	s	43	49	21	8	PAB	PAB: Corrigir para 22 27 45 s 43 49 21 w (rio Para'iba do Sul em barra do Pira'i)	Localidade-tipo	Reis et al. (2006).	Estado de Conservaç╞o: Criticamente em perigo.	Categoria de ameaça em listas regionais: "Endanger	Atlantic forest	44853.2	Paraiba do Sul	ATLANTICO SUDESTE	EN	B1a, b i;iii	6	ASE17	2.14478	47	Rio Paraiba do Sul em Barra do Piraí
357	514	Delturinae	137	Hemipsilichthys papillatus Pereira, Oliveira & Oyakawa, 2000	Drenagem do Paraíba do Sul, Município de Rio Preto, 22°02'S 43°47W, ribeir╞o Santana, tributário do rio Preto, Estado de Minas Gerais, Brasil.	Tributários do rio Preto, bacia do Paraíba do Sul, Estado de Minas Gerais.		Reis et al 2006	RR	NAM	-22.0333	-43.7833	22	2	0	s	43	47	0	8	PAB	PAB	Localidade-tipo				Atlantic forest	33406.4	Paraiba do Sul	ATLANTICO SUDESTE	EN	B1a, b i;iii	6	ASE18	0	45	Rio Preto, drenagem do Paraíba do Sul
284	525	Heptapteridae	138	Chasmocranus brachynema Gomes & Schubart, 1958	Rio Mogi Guaçu, Cachoeira de Emas, Municipio de Piraçununga, Estado de S╞o Paulo, Brasil.	Distribuiçáo: Bacia do Mogi Guaçu (afluente do alto Paraná).	Rio Mogi Guaçu, Pirassununga, S╞o Paulo	??	RR	NAM	-20.8833	-48.1667	20	53	0	s	48	10	0	10	NAM	OTO	Localidade-tipo	Bockmann (1998).	Estado de Conservaç╞o: Vulnerável.		CERRADO	206891	Upper Parana	PARANA	EN	B1a, b i;iii	6	PRN15	0.477976	0	Rio Mogi Guaçu e Cachoeira de Emas
283	533	Heptapteridae	138	Imparfinis schubarti (Gomes, 1956)	Cachoeira de Emas, rio Mogi-Guaçu, e do córrego do Tijuco Preto, um seu afluente, Municipio de Pirassununga, Estado de S╞o Paulo, Brasil.	Alto Paraná.	Cachoeira de Emas, SP	USBGN	RR	NAM	-20.88	-48.16	21	56	0	s	47	22	0	11	NAM	OTO	Localidade-tipo	Bockmann (1998).			CERRADO	206891	Upper Parana	PARANA	EN	B1a, b i;iii	6	PRN15	0.477976	0	Rio Mogi Guaçu e Cachoeira de Emas
325	537	Heptapteridae	138	Pimelodella avanhandavae Eigenmann, 1917	Rio Tietê no Salto Avanhandava, acima da queda, Estado de S╞o Paulo, Brasil.	Bacia do Tietê.	Rio Tiete, acima do Salto Avanhandava	Arcmap	RR	OTO	-21.2411	-49.9219	21	14	28	s	49	55	19	10	NAM	OTO	Localidade-tipo				Atlantic forest	27828.2	Upper Parana	PARANA	EN	B1a, b i;iii	6	PRN45	0	4	Rio TietÛ, Avanhandava
146	549	Heptapteridae	138	Rhamdella robinsoni Fowler, 1941	S╞o José do Egito, Estado do Pernambuco, Brasil.	Rio Pajeé (afluente do baixo S╞o Francisco).	Rio Pajeé, S╞o José do Egito, Pernambuco	Funny Gazetteer	RR	NAM	-8.9167	-38.7	8	55	0	s	38	42	0	7	OTO	OTO	Localidade-tipo	Bockmann (1998).			Caatinga	13890.6	S. Francisco	S├O FRANCISCO	VU	D2	6	SFR02	0	65	Rio São Francisco e Foz do Paje·
470	547	Heptapteridae	138	Rhamdella longiuscula Lucena & Silva, 1991	Arroio Passo do Alto, próximo a localidade de Mineral, S╞o Nicolau, aproximadamente 28°08'S 55°20'W, Estado do Rio Grande do Sul, Brasil.	Tributários da margem esquerda do médio Uruguai.		Buckup et al 2007	RR	OTO	-28.1333	-55.3333	28	8	0	s	55	20	0	1	PAB	PAB	Localidade-tipo	Bockmann (1998).			Pampas	12303.1	Lower Uruguay	URUGUAI	EN	B1a, b i;iii	6	URU16	0	33	Arroio Passo do Alto, São Nicolau
420	378	Hypoptopomatinae	136	Pseudotocinclus juquiae Takako, Oliveira & Oyakawa, 2005	Primeiro tributário do rio Juquiá, próximo a ribeir╞o das Antas, na estrada de S╞o Lourenço da Serra a Juquitiba, 23°59'49,1"S 46°56'01 ,OW, Município de Juquitiba, Estado de S╞o Paulo, Bras	Bacia do Juquiá.	tributário rio Juquiá, mun. De Juquitiba, SP	Buckup et al. 2007	RR	NAM	-23.8333	-46.9333	23	50	0	s	46	56	0	2	OTO	OTO	Localidade-tipo				Atlantic forest	23608.9	Ribeira de Iguape	ATLANTICO SUDESTE	VU	D2	6	ASE32	0.750291	92	Rio São Lourenço
603	361	Hypoptopomatinae	136	Otothyris lophophanes Eigenmann & Eigenmann, 1889	Santa Cruz, Brasil.	Bacias costeiras do Estado do Rio de Janeiro.	Santa Cruz RJ	ARcmap	RR	NAM	-22.9289	-43.5697	22	55	44	s	43	34	11	8	PAB	PAB	Localidade-tipo	Garavello ai ai. (1998).			Atlantic forest	133514	Fluminense	ATLANTICO SUDESTE	EN	B1a, b i;iii	5	ASE40	20.9807	34	Rios costeiros no Rio de JAneiro
757	348	Hypoptopomatinae	136	Eurycheilichthys limulus Reis & Schaefer, 1998	Rio Jacui na estrada RS-010, entre Marau e Passo Fundo, Estado do Rio Grande do Sul, Brasil.	Bacia do alto Jacui, Estado do Rio Grande do Sul.	Rio jacui, entre marau e Passo fundo	Arcmap	RR	NAM	-28.3514	-52.3082	28	21	5	s	52	18	30	1	PAB	PAB	Localidade-tipo				Atlantic forest	186991	Laguna dos Patos	ATLANTICO SUL	EN	B1a, b i;iii	6	ASU18	0	13	Alto Rio Jacui
766	345	Hypoptopomatinae	136	Epactionotus bilineatus Reis & Schaefer, 1998	Boca do arroio do Ouro no rio Maquiné, entre Barra do Ouro e Maquiné, Estado do Rio Grande do Sul, Brasil.	Bacias do Maquiné e Três Forquiihas, Estado do Rio Grande do Sul.	Rio Maquiné, em Maquiné, RS	ARCMAP	RR	OTO	-29.6351	-50.2239	29	38	7	s	50	13	26	1	PAB	PAB	Localidade-tipo	Reis & Schaefer (1998).			Atlantic forest	56022.2	Laguna dos Patos	ATLANTICO SUL	EN	B1a, b i;iii	6	ASU22	10.3487	72	Rio Maquiné
771	848	Hypoptopomatinae	136	Eurycheilichthys zsp. 6		Drenagem do alto Antas (bacia do Jacui).			RR	NAM	-28.3906	-51.0561	28	23	26	s	51	3	22	0		PAB: 28 23 26 S 51 03 22 W (MCP 40659)	Lote de referência (MCP 40659).				Atlantic forest	18378.2	Laguna dos Patos	ATLANTICO SUL	VU	D2	6	ASU25	0	70	Arroi Espeto
804	347	Hypoptopomatinae	136	Epactionotus itaimbezinho Reis & Schaefer, 1998	Rio Canoas, tributário do Mampituba, cerca de 8 km de Praia Grande em direç╞o a M╞e dos Homens, Estado do Rio Grande do Sul, Brasil.	Bacia do Mampituba, estados do Rio Grande do Sul e Santa Catarina.	Rio Mampituba, Em Mampituba, RS, entre Praia Grande SC e Mampitubas, RS	ARCMAP	RR	OTO	-29.2053	-49.9458	29	12	19	s	49	56	45	1	PAB	PAB	Localidade-tipo	Reis & Schaefer (1998).			Atlantic forest	24471.8	Tramandai - Mampituba	ATLANTICO SUL	EN	B1a, b i;iii	6	ASU45	23.2712	33	Bacias dos rios Faxinalzinho e Mampituba
814	353	Hypoptopomatinae	136	Eurycheilichthys zsp. 4		Bacia do Taquari, Estado do Rio Grande do Sul.	Sanga Taquari, Em S╞o Francisco de Assis RS	ARCMAP	RR		-28.3581	-52.2642	28	21	29	s	52	15	51	1	PAB	PAB: Corrigir para 28°21'29"S, 52°15'51"W (MCP 40664)	Lote de referência (MCP 40664).				Atlantic forest	27025.8	Laguna dos Patos	ATLANTICO SUL	EN	B1a, b i;iii	6	ASU55	4.06343	7	Bacia do rio Capingui
176	374	Hypoptopomatinae	136	Parotocinclus prata Ribeiro, Melo & Pereira, 2002	Riacho tributário do Ribeir╞o Quiricó na fazenda S╞o Zeferino, próximo a Galena, cabeceiras do rio da Prata, bacia do S╞o Francisco, Presidente Olegário, Estado de Minas Gerais, Brasil.	Bacia do alto S╞o Francisco.		Species Link MZUSP 68359	RR	NAM	-18.3666	-46.2167	0	0	0		0	0	0	8	PAB	PAB: Corrigir a longitude para -46.216667	Localidade-tipo				CERRADO	58305.3	S. Francisco	S├O FRANCISCO	EN	B1a, b i;iii	5	SFR19	0	57	Riacho da Prata
750	349	Hypoptopomatinae	136	Eurycheilichthys pantherinus Reis & Schaefer, 1992	Riacho tributário do rio dos Touros, na estrada de Silveira para Rondinha, Bom Jesus, Estado do Rio Grande do Sul, Brasil.	Bacias do alto e médio Uruguai.	Rio Dos Touros, Em Bom Jesus, RS	ARCMAP	RR	OTO	-28.6275	-50.3189	28	37	39	s	50	19	8	1	PAB	PAB	Localidade-tipo				Atlantic forest	45277.3	Upper Uruguay	URUGUAI	VU	D2	5	URU23	0	98	Rio dos Touros e Arroio Agua Branca
228	461	Hypostominae	136	Pareiorhaphis stephanus Oliveira & Oyakawa, 1999	Ribeir╞o das Pedras, ca. 1300 masl, 3 km ao norte de Diamantina, aproximadamente 18°10'S 43°37'W, drenagem do rio Jequitinhonha, Município de Diamantina, Estado de Minas Gerais, Brasil.	Bacias do Jequitinhonha, Itacarambi e S╞o Francisco,	Ribeir╞o das Pedras em Diamantina MG	ARCMAP	RRT	OTO	-18.2193	-43.6352	18	13	10	s	43	38	7	8	PAB	PAB: Espérie é RRT	Localidade-tipo	Pereira & Reis (2002).			CERRADO	37918.9	Northeastern Mata Atlantica	ATLANTICO LESTE	VU	D2	6	ALE14	27.0578	100	Ribeirão das Pedras
423	446	Hypostominae	136	Kronichthys lacerta (Nichols, 1919)	Poço Grande, rio Juquiá, Estado de S╞o Paulo, Brasil.	Bacias da baia de Paranaguá e Ribeira de Iguape.	PESM Nucleo Pedro de Toledo.	Species Link MZUSP 78601, coo	RR	NAM	-24.34	-47.6581	0	0	0		0	0	0	2	OTO	OTO	Localidade-tipo	Armbruster & Page (1997).			Atlantic forest	28415.5	Ribeira de Iguape	ATLANTICO SUDESTE	VU	D2	5	ASE35	69.0534	82	Rio Juquiá
458	448	Hypostominae	136	Pareiorhaphis azygolechis Pereira & Reis, 2002	Rio Araraquara cerca de 8 km ao norte de Guaruva, 25'57'58"S 48'49'43"W, Guaratuba, Estado do Paraná, Brasil.	Bacia do S╞o Jo╞o.	Rio Araraquara cerca de 8 km ao norte de Guaruva, 25'57'58"S 48'49'43"W, Guaratuba, Estado do Paraná, Brasil.	Pereira e Reis 2002	RR	NAM	-25.9661	-48.8286	25	57	58	s	48	49	43	1	PAB	PAB	Localidade-tipo				Atlantic forest	40088.9	Southeastern Mata Atlantica	ATLANTICO SUL	VU	D2	6	ASU05	77.7259	83	Rio Araraquara, Garuva
764	453	Hypostominae	136	Pareiorhaphis hypselurus Pereira & Reis, 2002	Rio Forqueta tributário do rio Maquiné, 29'32'42"S 50'14'21'W, Municipio de Maquiné, Estado do Rio Grande do Sul, Brasil.	Bacias do Maquiné e do Três Forquilhas (Estado do Rio Grande do Sul); bacia		Pereira e Reis 2002	RR	NAM	-29.545	-50.2392	29	32	42	s	50	14	21	1	PAB	PAB	Localidade-tipo				Atlantic forest	56022.2	Laguna dos Patos	ATLANTICO SUL	EN	B1a, b i;iii	6	ASU22	10.3487	72	Rio Maquiné
204	455	Hypostominae	136	Pareiorhaphis mutuca Oliveira & Oyakawa, 1999	Bacia do rio das Velhas, Municipio de Nova Lima, córrego Mutuca, ao lado direito da estrada de Belo Horizonte para Nova Lima, km 20, aproximadamente 20'60'S 43'55'W, Estado de Minas Gerais,	Espécie conhecida apenas da localidade-tipo.		Buckup et al 2007	RRT	NAM	-20	-43.9167	20	0	0	s	43	55	0	8	PAB	PAB: Corrigir para 20 00 00 s 43 55 00 w	Localidade-tipo	Pereira & Reis (2002).	Estado de Conservaç╞o: Vulnerável.		Atlantic forest	272737	S. Francisco	S├O FRANCISCO	EN	B1a, b i;iii	6	SFR39	55.0982	76	Alto Rio das Velhas
712	423	Hypostominae	136	Hypostomus luteus (Godoy, 1980)	Rio Pelotas em Volta Grande 2, Marcelino Ramos, Estado do Rio Grande do Sul, Brasil.	Alto Uruguai.	Rio Pelotas, alto Uruguai, em volta grande	Arcmap	RR	NAM	-27.4575	-51.9147	27	27	27	s	51	54	53	1	PAB	PAB, CN	Localidade-tipo	Reis et al. (1990), Montoya-Burgos et al. (2002).			Atlantic forest	50562.6	Upper Uruguay	URUGUAI	EN	B1a, b i;iii	6	URU20	0	5	Rio Pelotas em Marcelino Ramos
323	454	Hypostominae	136	Pareiorhaphis hystrix Pereira & Reis, 2002	Riacho tributário do rio dos Touros, estrada de Silveira para Rondinha, 28°39'18"S 50°18'25"W, Municipio de Bom Jesus, Estado do Rio Grande do Sul, Brasil.	Cabeceiras do Pelotas (alto Uruguai), rios Ijui e Piratinim (rio Uruguai) e		Buckup et al 2007	RR	NAM	-28.655	-50.3069	28	39	18	s	50	18	25	10	NAM	OTO	Localidade-tipo				Atlantic forest	75100.1	Upper Parana	PARANA	EN	B1a, b i;iii	5	URU23	0	98	Rio dos Touros e Arroio Agua Branca
584	118	Incertae	115	Creagrutus petilus Vari & Harold, 2001	Rio Marco Rondon, Pimenta Bueno, aproximadamente 11°29'S 61°12'W, Estado de Rondônia, Brasil.	Bacia do Machado, Estado de Rondônia.		Buckup et al 2007	RR	NAM	-11.4833	-61.2	11	29	0	s	61	12	0	14	PAB	PAB	Localidade-tipo	Vari & Harold (2001).			Amazonia	113369	Madeira Brazilian Shield	AMAZONICA	EN	B1a, b i;iii	6	AMA52	0	22	Igarapé Palmeira
647	192	Incertae	115	Moenkhausia phaeonota Fink, 1979	Margens de um lago abaixo do rio dos Peixes, rio Arinos, drenagem do Juruena-Tapajós, Estado do Mato Grosso, Brasil.	Bacia do alto Tapajós.	Rio Peixe-Rio Arinos, confuencia	Arcmap	RRT	NAM	-10.7553	-57.9021	10	45	19	s	57	54	8	14	PAB	PAB (Esta espécie é RRT)	Localidade-tipo				Amazonia	15421.9	Tapajos - Juruena	AMAZONICA	VU	D2	6	AMA71	0	73	Rio dos Peixes
656	190	Incertae	115	Moenkhausia nigromarginata Costa, 1994	Pequeno riacho afluente do rio Cravari, próximo a estrada MT-170, aproximadamente 10 km N de Campo Novo do Parecis, bacia do Tapajós, Estado do Mato Grosso, Brasil.	Bacia do alto Tapajós.	Afluente do Cravari, cortando estrada citada	Arcmap	RR	NAM	-13.4767	-57.9149	13	28	36	s	57	54	54	3	OTO	OTO	Localidade-tipo				CERRADO	56974.8	Tapajos - Juruena	AMAZONICA	EN	B1a, b i;iii	5	AMA76	0	27	Bacia do Rio Cravari
599	83	Incertae	115	Astyanax hastatus Myers, 1928	Regi╞o do Rio de Janeiro, Brasil.	Rios costeiros da Baixada Fluminense.	Rio de Janeiro	Arcmap	RR	NAM	-22.8764	-43.4233	22	52	35	s	43	25	24	8	PAB	PAB	Localidade-tipo	Meio (2001).			Atlantic forest	133514	Fluminense	ATLANTICO SUDESTE	EN	B1a, b i;iii	5	ASE40	20.9807	34	Rios costeiros no Rio de JAneiro
600	97	Incertae	115	Astyanax scabripinnis (Jenyns, 1842)	Rio de Janeiro, Brasil.	Espécie conhecida apenas da localidade-tipo.	Rio de Janeiro	Arcmap	RRT	NAM	-22.8764	-43.4233	22	52	35	s	43	25	24	8	PAB	PAB	Localidade-tipo			Categoria de ameaça em listas regionais: Extinta n	Atlantic forest	133514	Fluminense	ATLANTICO SUDESTE	EN	B1a, b i;iii	5	ASE40	20.9807	34	Rios costeiros no Rio de JAneiro
601	145	Incertae	115	Hyphessobrycon flammeus Myers, 1924	Rio de Janeiro, Brasil.	Rios costeiros do Estado do Rio de Janeiro.	Rio de Janeiro	Arcmap	RRT	NAM	-22.8764	-43.4233	22	52	35	s	43	25	24	8	PAB	PAB: Distribuiç╞o é RRD.	Localidade-tipo	Weitzman el ai. (1988).	Estado de Conservaç╞o: Em perigo.	Categoria de ameaça em listas regionais: Vulneráve	Atlantic forest	133514	Fluminense	ATLANTICO SUDESTE	EN	B1a, b i;iii	5	ASE40	20.9807	34	Rios costeiros no Rio de JAneiro
404	126	Incertae	115	Deuterodon langei Travassos, 1957	Córrego da Divisa, Morretes, Estado do Paraná, Brasil.	Bacias costeiras entre do rio Cubat╞o [norte]. Estado de Santa Catarina até	PE Roberto Ribas Lage, Morretes, PR	ARCMAP	RR	OTO	-25.3159	-48.8893	25	18	57	s	48	53	22	2	OTO	OTO	Localidade-tipo				Atlantic forest	41537.7	Ribeira de Iguape	ATLANTICO SUL	VU	D2	5	ASU01	66.0103	92	Afluentes do canal de Paranaguá em Morretes
755	79	Incertae	115	Astyanax cremnobates Bertaco & Malabarba, 2001	Tributário do rio Santa Cruz, 29°23'S 50°32'W, alt. 850 m, Município de S╞o Francisco de Paula, Estado do Rio Grande do Sul, Brasil.	Cabeceiras de planalto da bacia do Jacui e bacia do Maquiné, no Estado do R		Buckup et al 2007	RR	NAM	-29.3833	-50.5333	29	23	0	s	50	32	0	1	PAB	PAB	Localidade-tipo				Atlantic forest	28881.3	Laguna dos Patos	ATLANTICO SUL	VU	D2	6	ASU16	2.56969	80	Rio Caí
762	130	Incertae	115	Deuterodon stigmaturus (Gomes, 1947)	Rio Maquiné, Estado do Rio Grande do Sul, Brasil.	Rio Maquiné, Estado do Rio Grande do Sul.	Alto Rio Maquiné, em Maquiné, RS	ARCMAP	RR	OTO	-29.5235	-50.3143	29	31	25	s	50	18	52	1	PAB	PAB (Sugest╞o: Colocar o ponto um pouco mais a jusante)	Localidade-tipo				Atlantic forest	56022.2	Laguna dos Patos	ATLANTICO SUL	EN	B1a, b i;iii	6	ASU22	10.3487	72	Rio Maquiné
761	198	Incertae	115	Odontostoechus lethostigmus Gomes, 1947	Rio Maquiné, afluente da lagoa de Quadros, Município de Conceiç╞o do Arroio [=Osório], Estado do Rio Grande do Sul, Brasil.	Bacias do Mampituba e do Tramandal.	Alto Rio Maquiné, em Maquiné, RS	ARCMAP	RR	OTO	-29.5233	-50.3142	29	31	24	s	50	18	51	1	PAB	PAB (Sugest╞o: Colocar o ponto um pouco mais a jusante)	Localidade-tipo		Estado de Conservaç╞o: Deficiente de dados.	Categoria de ameaça em listas regionais: Vulneráve	Atlantic forest	56022.2	Laguna dos Patos	ATLANTICO SUL	EN	B1a, b i;iii	6	ASU22	10.3487	72	Rio Maquiné
774	124	Incertae	115	Cyanocharax tipiaia Malabarba & Weitzman, 2003	Arroio Tipiáia, cerca de 13 km ao norte de Jélio de Castilhos, na estrada para Cruz Alta, Estado do Rio Grande do Sul, Brasil.	Pequenos tributários da vertente oeste da bacia do Jacuí, próximo a Jélio d	Arroio Tipiaia, em Julio de Castilhos	Arcmap	RR	NAM	-29.1055	-53.6271	29	6	20	s	53	37	38	1	PAB	PAB	Localidade-tipo				Pampas	63654	Laguna dos Patos	ATLANTICO SUL	EN	B1a, b i;iii	6	ASU28	0	56	Arroio Tipiaia
803	123	Incertae	115	Cyanocharax itaimbe Malabarba & Weitzman, 2003	Arroio Falc╞o em M╞e dos Homens, tributário do rio Canoas-rio Mampituba, Município de Praia Grande, Estado de Santa Catarina, Brasil.	Bacias do Araranguá, Mampituba e Tramandai.	Rio Mampituba, Em Mampituba, RS, entre Praia Grande SC e Mampitubas, RS	ARCMAP	RR	OTO	-29.2053	-49.9458	29	12	19	s	49	56	45	1	PAB	PAB	Localidade-tipo				Atlantic forest	24471.8	Tramandai - Mampituba	ATLANTICO SUL	EN	B1a, b i;iii	6	ASU45	23.2712	33	Bacias dos rios Faxinalzinho e Mampituba
665	187	Incertae	115	Moenkhausia lopesi Britski & Silimon, 2001	Ribeir╞o Sozinho na rodovia BR 163, entre Rondon6polis e Coxim, aproximadamente 17°30'S 55°10'W, Município de Rondon6poiis, Estado do Mato Grosso, Brasil.	Bacia do alto Paraguai.		Buckup et al 2007	RR	NAM	-17.5	-55.1667	17	30	0	s	55	10	0	3	OTO	OTO	Localidade-tipo				Pantanal	52571.9	Paraguay	PARAGUAI	VU	D2	6	PRG17	100	89	Ribeirão Sozinho, bacia do Itiquira
510	185	Incertae	115	Moenkhausia hysterosticta, Lucinda, Malabarba & Benine, 2007	Rio Tocantins, Ipueira, Tocantins	Médio curso do Rio Tocantins, entre Porto Naciona, Ipueiras e Lageado			RR	OTO	-11.3167	-48.4667	11	19	0	s	48	28	0	4	NAM	OTO					CERRADO	309336	Tocantins - Araguaia	TOCANTINS-ARAGUAIA	VU	D2	4	TOAR29	1.41355	100	Rio Tocantins, Ipueiras
441	171	Incertae	115	Hypobrycon maromba Malabarba & Malabarba, 1994	Rio das Marombas, aproximadamente 10 km de sua foz na ponte Irineu Bornhausen, na velha estrada para Campos Novos, aproximadamente 27°11'S 50°38'W, Estado de Santa Catarina, Brasil.	Alto Uruguai.		Buckup et al 2007	RR	NAM	-27.1833	-50.6333	27	11	0	s	50	38	0	1	PAB	PAB	Localidade-tipo				Atlantic forest	123041	Upper Uruguay	URUGUAI	EN	B1a, b i;iii	5	URU03	0	43	Rio das Marombas
749	77	Incertae	115	Astyanax brachypterygium Bertaco & Malabarba, 2001	Arroio ╡gua Branca, 28°36'S 50°24'W, alI. 1050 m, Municipio de Bom Jesus, Estado do Rio Grande do Sul, Brasil.	Cabeceiras da bacia do Uruguai e do Jacui, acima de 1000 m de altitude no p		Buckup et al 2007	RR	NAM	-28.6	-50.4	28	36	0	s	50	24	0	1	PAB	PAB	Localidade-tipo			Categoria de ameaça em listas regionais: Deficient	Atlantic forest	45277.3	Upper Uruguay	URUGUAI	VU	D2	5	URU23	0	98	Rio dos Touros e Arroio Agua Branca
751	106	Incertae	115	Bryconamericus patriciae Pezzi da Silva, 2004	Arroio tributário do rio Pelotas, na estrada de Silveira para Rondinha (bacia do Uruguai), Bom Jesus, Rio Grande do Sul, Brasil.	Cabeceiras dos rios Pelotas e das Antas, alto rio Uruguai.	Bom jesus RS	CIVI IBGE	RR	NAM	-28.6719	-49.9656	28	40	19	s	49	57	56	1	PAB	PAB: Corrigir para 28 40 19 S 49 57 56 W (Tributário do rio Cerquinha)	Localidade-tipo				Atlantic forest	38617.6	Upper Uruguay	URUGUAI	VU	D2	5	URU24	0	91	Afluente do Rio Pelotas, São José dos Ausentes
227	388	Loricariinae	136	Harttia garavelloi Oyakawa, 1993	Rio Fanado, ponte da cidade de Minas Novas, 17°15'S 42°35W, Estado de Minas Gerais, Brasil.	Rio Fanado, bacia do Jequitinhonha, Estado de Minas Gerais.	Rio Fanado, Minas Novas, MG	Buckup et al. 2007	RR	NAM	-17.25	-42.5833	17	15	0	s	42	35	0	8	PAB	PAB	Localidade-tipo				CERRADO	47784.6	Northeastern Mata Atlantica	ATLANTICO LESTE	VU	D2	6	ALE13	2.741	99	Rio Fanado
602	393	Loricariinae	136	Harttia rhombocephala Miranda Ribeiro, 1939	Rio Farias (afluente do rio Jacaré, sistema da Baia de Guanabara), Estado do Rio de Janeiro, Brasil.	Espécie conhecida apenas da localidade-tipo.	Rio de Janeiro	Arcmap	RRT	OTO	-22.8764	-43.4233	22	52	35	s	43	25	24	8	PAB	PAB	Localidade-tipo		Estado de Conservaç╞o: Criticamente em perigo.		Atlantic forest	133514	Fluminense	ATLANTICO SUDESTE	EN	B1a, b i;iii	5	ASE40	20.9807	34	Rios costeiros no Rio de JAneiro
767	403	Loricariinae	136	Rineloricaria maquinensis Reis & Cardoso, 2001	Arroio ╡gua Parada, afluente do rio Maquiné, 29°40'S 50 12'W, Maquiné, Estado do Rio Grande do Sul, Brasil.	Bacia do rio Maquiné, Estado do Rio Grande do Sul e sistema do rio Ararangu		Buckup et al 2007	RR	OTO	-29.6667	-50.2	29	40	0	s	50	12	0	1	PAB	PAB	Localidade-tipo				Atlantic forest	56022.2	Laguna dos Patos	ATLANTICO SUL	EN	B1a, b i;iii	6	ASU22	10.3487	72	Rio Maquiné
768	408	Loricariinae	136	Rineloricaria quadrensis Reis, 1983	Lagoa dos Quadros, Osório, Estado do Rio Grande do Sul, Brasil.	Bacia da lagoa dos Quadros e rio Maquiné, no Estado do Rio Grande do Sul.	Lagoa Quadros, atualmente em Maquiné, RS	USBGN e ARCMAP	RR	OTO	-29.7	-50.25	29	42	0	s	50	15	0	1	PAB	PAB	Localidade-tipo				Atlantic forest	56022.2	Laguna dos Patos	ATLANTICO SUL	EN	B1a, b i;iii	6	ASU22	10.3487	72	Rio Maquiné
319	389	Loricariinae	136	Harttia gracilis Oyakawa, 1993	Riacho afluente do rio S╞o Jo╞o, Municipio de Fortaleza de Minas, próximo da estrada de ferro Minas-Perobas, 20º 58'S 46°47W, Estado de Minas Gerais, Brasil.	Espécie conhecida apenas da localidade-tipo.		Buckup et al 2007	RR	OTO	-20.9667	-46.7833	20	58	0	s	46	47	0	9	OTO	OTO	Localidade-tipo				Atlantic forest	61318.6	Upper Parana	PARANA	EN	B1a, b i;iii	6	PRN40	0	0	Bacia do Rio São João
202	391	Loricariinae	136	Harttia leiopleura Oyakawa, 1993	Riacho afluente do córrego Mutuca, a direita da estrada Belo Horizonte -Nova Lima, km 20, 20º60'S 43°55'W, Estado de Minas Gerais, Brasil.	Espécie conhecida apenas da localidade-tipo.		Buckup et al 2007	RR	OTO	-20	-43.9167	20	0	0	s	43	55	0	8	PAB	PAB: Corrigir para 20 00 00 s 43 55 00 w	Localidade-tipo				Atlantic forest	272737	S. Francisco	S├O FRANCISCO	EN	B1a, b i;iii	6	SFR39	55.0982	76	Alto Rio das Velhas
203	392	Loricariinae	136	Harttia novalimensis Oyakawa, 1993	Riacho afluente do córrego Mutuca, a direita da estrada Belo Horizonte -Nova Lima, km 20, 20°60'S 43°55'W, Estado de Minas Gerais, Brasil.	Espécie conhecida apenas da localidade-tipo.		Buckup et al 2007	RR	OTO	-20	-43.9167	20	0	0	s	43	55	0	8	PAB	PAB: Corrigir para 20 00 00 s 43 55 00 w	Localidade-tipo				Atlantic forest	272737	S. Francisco	S├O FRANCISCO	EN	B1a, b i;iii	6	SFR39	55.0982	76	Alto Rio das Velhas
206	394	Loricariinae	136	Harttia torrenticola Oyakawa, 1993	Riacho afluente do rio Paraopeba, ╡gua Limpa, Municlpio de Moeda, 3 km da BR-040, acima das cachoeiras, 20°20'S 44º2'W, Estado de Minas Gerais, Brasil.	Espécie conhecida apenas da localidade-tipo.		Buckup et al 2007	RR	OTO	-20.3333	-44.0333	20	20	0	s	44	2	0	8	PAB	PAB	Localidade-tipo				Atlantic forest	73246.6	S. Francisco	S├O FRANCISCO	EN	B1a, b i;iii	6	SFR40	0.651761	25	Riacho Agua Limpa, Afluente do Paraopeba
205	336	Neoplecostominae	136	Neoplecostomus franciscoensis Langeani, 1990	Riacho afiuente do córrego da Mutuca, a direita da estrada Belo Horizonte -Nova Lima, Km 20, 43°55'N 20°06'W, Estado de Minas Gerais, Brasil.	Riachos de cabeceiras do rio das Velhas e rio Paraopeba (afiuentes do rio S		Buckup et al 2007	RR	NAM	-20.1	-43.9167	20	6	0	s	43	55	0	8	PAB	PAB	Localidade-tipo				Atlantic forest	272737	S. Francisco	S├O FRANCISCO	EN	B1a, b i;iii	6	SFR39	55.0982	76	Alto Rio das Velhas
425	774	Poeciliidae	251	Phalloceros zsp. O		Drenagem do rio Juquiá (bacia do Ribeira de Iguape).	Rio Juquiá	USBGN	RR	NAM	-24.3667	-47.8167	24	22	0	s	47	49	0	2	OTO	PAB	Lote de referência (MCP 30404).	Lucinda & Reis (2005).			Atlantic forest	28415.5	Ribeira de Iguape	ATLANTICO SUDESTE	VU	D2	5	ASE35	69.0534	82	Rio Juquiá
428	759	Poeciliidae	251	Cnesterodon iguape Lucinda, 2005	Riacho nas cabeceiras do rio Iporanga, na Mineradora Oxlcal, Municiplo de Apiai, Estado de S╞o Paulo, Brasil.	Espécie conhecida apenas da localidade-tipo.	Apiaí SP	CIVI IBGE	RRT	NAM	-24.5094	-48.8425	24	30	34	s	48	50	33	2	OTO	OTO	Localidade-tipo				Atlantic forest	21469.8	Ribeira de Iguape	ATLANTICO SUDESTE	VU	D2	6	ASE38	0	76	Afluentes do Ribeira de Iguape em Apiaí
462	772	Poeciliidae	251	Phalloceros zsp. M		Bacia do Jacarei (afluente da baía de Paranaguá).	Riacho na Baía de Paranaguá, Paraná	Fuzzy Gazetteer	RR	NAM	-25.5506	-48.6711	25	33	2	s	48	40	16	9	OTO	PAB: 25 33 02 s 48 40 16 w (BR 277 e limite entre Paranagua e Morretes)	Lote de referência (MCP 30472).	Lucinda & Reis (2005).			Atlantic forest	85533.6	Southeastern Mata Atlantica	ATLANTICO SUL	VU	D2	5	ASU07	32.0489	88	Bacias Costeiras em Paranaguá
815	756	Poeciliidae	251	Cnesterodon brevirostratus Rosa & Costa, 1993	Arroio Camisa, tributário do rio das Antas, Parque Nacional dos Aparados da Serra, Cambará do Sul, Estado do Rio Grande do Sul, Brasil.	Alto rio Pelotas e Canoas (bacia do Uruguai), rio Jacui e cabeceiras do rio	PN Aparados da Serra	ARCMAP	RR	OTO	-29.1578	-50.1439	29	9	28	s	50	8	38	1	PAB	PAB: Corrigir para 29 09 28 50 08 38 w (rio Camisa na estrada de acesso ao PARNA Aparados da Serra))	Localidade-tipo	Lucinda & Garavello (2000), Lucinda (2005a).			Atlantic forest	90537.3	Laguna dos Patos	ATLANTICO SUL	VU	D2	6	ASU56	5.66367	90	Alto Rio Garrafa, Afluente do Rio das Antas
297	780	Poeciliidae	251	Phallotorynus jucundus von Ihering, 1930	Cabeceira do rio Tamanduá, tributário do rio Pardo, S╞o Sim╞o, Estado de S╞o Paulo, Brasil.	Drenagem do alto Pardo, na bacia do Grande, sistema do alto rio Paraná.	Ribeir╞o tamanduá, cabeceira	Arcmap	RR	NAM	-21.5378	-47.6174	21	32	16	s	47	37	3	11	NAM	OTO	Localidade-tipo	Lucinda et al. (2005).	Estado de Conservaç╞o: Vulnerável.	Categoria de ameaça em listas regionais: Vulneráve	CERRADO	55693.7	Upper Parana	PARANA	EN	B1a, b i;iii	6	PRN27	6.00843	0	Rio Tamanduá
765	517	Pseudopimelodidae	137	Microglanis cibelae Malabarba & Mahler Jr., 1998	Arrolo do Ouro, rio Maqulné, Estado do Rio Grande do Sul, Brasil.	Rios costeiros da formaç╞o Serra Geral, estados do Rio Grande do Sul e Sant	Bacia do Maquiné, Maquiné, RS	Arcmap	RR	OTO	-29.5519	-50.2988	29	33	7	s	50	17	56	1	PAB	PAB	Localidade-tipo				Atlantic forest	56022.2	Laguna dos Patos	ATLANTICO SUL	EN	B1a, b i;iii	6	ASU22	10.3487	72	Rio Maquiné
137	515	Pseudopimelodidae	137	Batrocoglanis melanurus Shibatta & Pavanelli, 2006	Córrego Cancela, afluente do rio Cuiabá, bacia do Paragual, 14°42,501'S 56°15,850'W, Nobres, Estado do Mato Grosso, Brasil.	Espécie conhecida apenas da localidade-tipo.		Buckup et al 2007	RRT	NAM	-14.7084	-56.2642	14	43	0	s	56	16	0	3	OTO	OTO	Localidade-tipo				CERRADO	10393.7	Paraguay	PARAGUAI	VU	D2	6	PRG07	0	100	Rio Cuiabá em Nobres
44	660	Rivulidae	250	Moema nudifrontata Costa, 2003	Várzea do rio Branco perto da ilha do Carneiro, Estado de Roraima, Brasil.	Drenagem do rio Branco, bacia do Amazonas.	Igarape Carneiro RR	USBGN	RR	OTO	1.3833	-61.2667	1	23	0	n	61	16	0	12	OTO	OTO	Localidade-tipo				Amazonia	144647	Amazonas Guiana Shield	AMAZONICA	VU	D2	5	AMA111	77.0266	92	Rio Branco, no Igarapé Carneiro
83	705	Rivulidae	250	Rivulus uatuman Costa, 2004	Poça temporaria junto a riacho próximo ao rio Uatum╞, bacia do Amazonas, 1°56'19,6"S, 59°59'27.30,6"W, elev. 43 m, Balbina, Estado do Amazonas, Brazil.	Bacia do Uatuman, na Amazônia central.		Buckup et al 2007	RRT	OTO	-1.9388	-59.9908	1	56	20	s	59	59	27	12	OTO	OTO	Localidade-tipo				Amazonia	21812.4	Amazonas Lowlands	AMAZONICA	VU	D2	6	AMA28	100	87	Igarapé Mutum
424	628	Rivulidae	250	Campellolebias intermedius Costa & De Luca «in» Costa, 2006	Poça temporária na estrada aproximadamente 6 km a oeste de Juquiá. drenagem do Juquiá (bacia do Ribeira de Iguape). aproximadamente 24'20'S 47°35?W. Estado de S╞o Paulo. Brsil.	Drenagem do Juquiá. na bacia do Ribeira de Iguape.	6 km a oeste de Juquiá, SP	ARCMAP	RRT	OTO	-24.34	-47.6581	24	20	24	s	47	39	29	2	OTO	OTO	Localidade-tipo				Atlantic forest	28415.5	Ribeira de Iguape	ATLANTICO SUDESTE	VU	D2	5	ASE35	69.0534	82	Rio Juquiá
604	644	Rivulidae	250	Kryptolebias brasiliensis (Valenciennes, 1821)	Rio de Janeiro. Brasil.	Bacias costeiras do Rio de Janeiro.	Registro adjacente ao PE Pedra Branca, em Costa 2004	Arcmap	RR	NAM	-22.9578	-43.4053	22	57	28	s	43	24	19	8	PAB	PAB	Localidade-tipo	Huber (1992).		Categoria de ameaça em listas regionais: Criticame	Atlantic forest	133514	Fluminense	ATLANTICO SUDESTE	EN	B1a, b i;iii	5	ASE40	20.9807	34	Rios costeiros no Rio de JAneiro
460	646	Rivulidae	250	Leptolebias aureoguttatus (Cruz, 1974)	Estrada Paranaguá-Matinhos, Estado do Paraná, Brasil. Bacias costeiras dos estados do Paraná e sul de S╞o Paulo.	Bacias costeiras dos estados do Paraná e sul de S╞o Paulo.	Estrada das Praias, km 5, Paranaguá.	Species Link MZUSP 38476	RR	NAM	-25.5167	-48.5333	0	0	0		0	0	0	2	OTO	OTO	Localidade-tipo	Costa (1995b).		Categoria de ameaça em listas regionais: Vulneráve	Atlantic forest	85533.6	Southeastern Mata Atlantica	ATLANTICO SUL	VU	D2	5	ASU07	32.0489	88	Bacias Costeiras em Paranaguá
779	610	Rivulidae	250	Austrolebias adloffi (Ahl, 1922)	Porto Alegre, Estado do Rio Grande do Sul, Brasil.	Bacia do baixo Jacui-Guaíba, incluindo as bacias do baixo Gravatai, do Sino	Porto Alegre, imediaçΣes	Arcmap	RR	NAM	-29.8535	-51.174	29	3	32	s	51	9	59	1	PAB	PAB: Corrigir para -29.85352 -51.17396	Localidade-tipo	Costa (2006a).	Estado de Conservaç╞o: Criticamente em perigo.	Categoria de ameaça em listas regionais: Criticame	Pampas	132378	Laguna dos Patos	ATLANTICO SUL	EN	B1a, b i;iii	5	ASU32	0.0523987	17	Bacia do Rio Rolante
784	617	Rivulidae	250	Austrolebias litzi Costa, 2006	2,5 km do arrolo Arenal, aproximadamente 12 km de Santa Maria, estrada BR-392, Estado do Rio Grande do Sul, Brasil.	Bacia do alto Jacui, no sistema da laguna dos Patos.	Santa maria	CIVI IBGE	RR	NAM	-29.6842	-53.8069	29	41	3	s	53	48	25	1	PAB	PAB	Localidade-tipo				Pampas	29629.4	Laguna dos Patos	ATLANTICO SUL	EN	B1a, b i;iii	6	ASU36	0	57	Arroio Arenal
293	703	Rivulidae	250	Rivulus scalaris Costa, 2005	Córrego tributário da bacia do alto Sucurui, bacia do Paraná, 18°53'54,7"S 52°58'44,2''W, Município de Costa Rica, Estado de Mato Grosso do Sul, Brasil.	Drenagens do Sucurui, do Aporé e do alto Correntes, na bacia do Paraná, e d		Buckup et al 2007	RR	NAM	-18.8985	-52.9789	18	53	55	s	52	58	44	3	OTO	OTO	Localidade-tipo				CERRADO	95640.3	Upper Parana	PARANA	EN	B1a, b i;iii	6	PRN23	80.6174	2	Rio Paraiso, afluente do Sucuri·
294	712	Rivulidae	250	Simpsonichthys boitonei Carvalho, 1959	Brasília, Distrito Federal, Brasil.	Rio S╞o Bartolomeu, bacia do alto Paraná.	Recor IBGE	Costa e Brasil 2006	RR	NAM	-15.9381	-47.8764	15	56	17	s	47	52	35	5	NAM	OTO	Localidade-tipo	Costa (1995b).	Estado de Conservaç╞o: Vulnerável.		CERRADO	50771.9	Upper Parana	PARANA	EN	B1a, b i;iii	6	PRN24	70.2558	26	Corrego Roncador e Bacia do Gama
547	693	Rivulidae	250	Rivulus kayapo Costa, 2006	Riacho perto do Km 52 GO-221, drenagem do Bonito, bacia do alto Caiapó (bacia do Araguaia), 16º41'52,4"S 51°25'13,6"W, Estado de Goiás, Brasil.	Espécie conhecida apenas da localidade-tipo.		Buckup et al 2007	RRT	NAM	-16.6979	-51.4204	16	41	52	s	51	25	14	3	OTO	OTO	Localidade-tipo				CERRADO	195392	Tocantins - Araguaia	TOCANTINS-ARAGUAIA	EN	B1a, b i;iii	4	TOAR53	0	54	Rio Bonito, Alto Caiapó
551	731	Rivulidae	250	Simpsonichthys marginatus Costa & Brasil, 1996	Barro Alto, Estado de Goiás, Brasil.	Rio Maranh╞o, bacia do Tocantins.	mata de galeria em várzea do Rio dos Patos, Barro alto, GO	Costa 2002 Peixes Anuais Bras	RR	NAM	-14.9342	-48.7997	14	56	3	s	48	47	59	5	NAM	OTO	Localidade-tipo		Estado de Conservaç╞o: Em perigo.		CERRADO	15396.9	Tocantins - Araguaia	TOCANTINS-ARAGUAIA	VU	D2	5	TOAR57	0	100	Rio dos Patos, Alto Rio Maranhão
797	614	Rivulidae	250	Austrolebias ibicuiensis (Costa, 1999)	BR-287 entre S╞o Pedro do Sul e Santa Maria, Estado do Rio Grande do Sul, Brasil.	Bacia do alto Ibicui, planfcie de inundaç╞o dos rios Ibicui-Mirim e Toropi,	Rio ibicui mirim entre Santa Maria e S╞o Pedro do Sul	Arcmap	RR	NAM	-29.6382	-54.0352	29	38	18	s	54	2	7	1	PAB	PAB	Localidade-tipo	Costa (2002c), Costa (2006a).	Estado de Conservaç╞o: Criticamente em perigo.	Categoria de ameaça em listas regionais: Criticame	Pampas	72037.2	Lower Uruguay	URUGUAI	EN	B1a, b i;iii	6	URU28	1.48723	22	Rio Ibicuí Mirim
405	282	Stegophilinae	133	Homodiaetus graciosa Koch, 2002	Rio Sagrado, posto fiorestal, Morrete, Estado do Paraná; Brasil.	Rio Ribeira de Iguape e rios costeiros no E3tado do Paronó.	Alto curso de drenagem costeria em Morretes, PR	Arcmap	RR	OTO	-25.3467	-48.8802	25	20	48	s	48	52	49	2	OTO	OTO	Localidade-tipo	Koch (2002).	Estado de Conservaç╞o: Vulnerável.		Atlantic forest	41537.7	Ribeira de Iguape	ATLANTICO SUL	VU	D2	5	ASU01	66.0103	92	Afluentes do canal de Paranaguá em Morretes
234	257	Trichomycterinae	133	Trichomycterus longibarbatus Costa, 1992	Próximo da Vila de Santa Tereza, 19°50'S 40°25'W, Estado do Espirito Santo, Brasil.	Espécie conhecida apenas da localidade-tipo.		Buckup et al 2007	RR	NAM	-19.8333	-40.4167	19	50	0	s	40	25	0	8	PAB	PAB	Localidade-tipo				Atlantic forest	65426	Northeastern Mata Atlantica	ATLANTICO SUDESTE	EN	B1a, b i;iii	5	ASE01	6.4377	40	Rio Fundão
429	270	Trichomycterinae	133	Trichomycterus potschi Barbosa & Costa, 2003	Rio das Cachoeiras, serra do Matutu, Municlpio de Mangaratiba, Estado do Rio de Janeiro, Brasil.	Bacias costeiras entre Mangaratiba e Itagual, no Estado do Rio de Janeiro.	Rio das Cachoeiras, entre Mangaratiba e Itaguaí, RJ	Fuzzy Gazetteer	RR	NAM	-22.95	-44.3333	22	57	0	s	44	20	0	9	OTO	OTO	Localidade-tipo				Atlantic forest	48012.5	Ribeira de Iguape	ATLANTICO SUDESTE	VU	D2	6	ASE39	41.4328	87	Bacias costeiras em Angra dos Reis
598	245	Trichomycterinae	133	Trichomycterus giganteus Lima & Costa, 2005	rio Guandu-Mirim, bacia do rio Guandu, Campo Grande, Município do Rio de Janeiro, Estado do Rio de Janeiro, Brasil.	Bacia do alto Guandu, na Serra do Mendanha, Estado do Rio de Janeiro.	Represa do Mendanha	GPS(Buckup)	RR	NAM, PAB	-22.8353	-43.4989	22	50	7	s	43	29	56	8	PAB	PAB	Localidade-tipo				Atlantic forest	133514	Fluminense	ATLANTICO SUDESTE	EN	B1a, b i;iii	5	ASE40	20.9807	34	Rios costeiros no Rio de JAneiro
311	240	Trichomycterinae	133	Trichomycterus candidus (Miranda Ribeiro, 1949)	Pequeno córrego que cai no ribeir╞o Espírito Santo, afluente do rio Claro e este do Sapucai, que deságua no rio Grande, Municipio de Conceiç╞o Aparecida, 21°00'S 46°15'W, Estado de Minas Ger	Espécie conhecida apenas da localidade-tipo.		Buckup et al 2007	RRT	NAM	-21	-46.25	21	0	0	s	46	15	0	9	OTO	OTO	Localidade-tipo				Atlantic forest	68659.6	Upper Parana	PARANA	EN	B1a, b i;iii	6	PRN33	0	16	Bacia do Rio Claro
312	243	Trichomycterinae	133	Trichomycterus diabolus Bockmann, Casatti & de Pinna, 2004	Córrego S╞o Carlos, 22°35'28,0"S 52°14'38,1'W, bacia do Paranapanema, Parque Estadual do Morro do Diabo, Município de Teodoro Sampaio, Estado de S╞o Pauio, Brasil.	Bacia do Parapanema.	Córrego S╞o Paulo, Mun. Teodor Sampaio SP	Buckup et al. 2007	RR	NAM	-22.5911	-52.2439	22	35	28	s	52	14	38	3	OTO	OTO	Localidade-tipo				Atlantic forest	25596.8	Upper Parana	PARANA	EN	B1a, b i;iii	6	PRN34	57.945	60	Afluentes do Paranapanema do PE Morro do Diabo
457	262	Trichomycterinae	133	Trichomycterus naipi Wosiacki & Garavello, 2004	Rio S╞o Jo╞o, tributário do rio da Várzea (bacia do Iguaçu), próximo a Lagoinha, 25'55'S 49'11'W, Município de Tijucas do Sul, Estado do Paraná, Brasil.	Alto rio Iguaçu.		Buckup et al 2007	RR	NAM	-25.9167	-49.1833	25	55	0	s	49	11	0	1	PAB	PAB	Localidade-tipo				Atlantic forest	69508.8	Southeastern Mata Atlantica	PARANA	EN	B1a, b i;iii	6	PRN64	2.59017	57	Rio da Várzea
590	286	Vandelliinae	134	Plectrochilus zsp. 2		Rondônia, Pimenta Bueno.	Arredores de Pimenta Bueno	Arcmap	RR	NAM	-11.6981	-61.0694	11	41	53	s	61	4	10	14	PAB	PAB	Lote de referência (INPA 10523).				Amazonia	47193.6	Madeira Brazilian Shield	AMAZONICA	EN	B1a, b i;iii	6	AMA55	0	57	Rio Machado
459	786	Anablepidae	252	Jenynsia weitzmani Ghedotti, Downing Meisner & Lucinda, 2001	Tributário do rio Pinheiros próximo a Anitápolis a 7 km da rodovia SC-407. Estado de Santa Catarina, Brasil.	Bacia do Tubar╞o, Estado de Santa Catarina.	Tributário do rio Pinheiros, Santa catarina	Funny Gazetteer	RR	NAM	-27.9	-49.1333	27	54	0	s	49	8	0	1	PAB	PAB	Localidade-tipo	Ghedotti el ai. (2001).			Atlantic forest	181029	Southeastern Mata Atlantica	ATLANTICO SUL	EN	B1a, b i;iii	5	ASU06	2.76704	33	Rio Braço do Norte
810	784	Anablepidae	252	Jenynsia sanctaecatarinae Ghedotti & Weitzman, 1996	Rio Pique, entre Meleiro e Araranguá, Estado de Santa Catarina, Brasil.	Bacia do Araranguá, Estado de Santa Catarina.	Rio Pique, Santa Catarina	Species link MZUSP	RR	NAM	-28.833	-49.666	0	0	0		0	0	0	1	PAB	PAB	Localidade-tipo				Atlantic forest	29790.9	Tramandai - Mampituba	ATLANTICO SUL	EN	B1a, b i;iii	5	ASU51	6.01535	43	Bacia do Rio Pique
386	783	Anablepidae	252	Jenynsia eigenmanni (Haseman, 1911)	Próximo a Serrinha, a três milhas do rio Iguaçu, Estado do Paraná, Brasil.	Bacia do alto Iguaçu.	Montanhas Serrinha, PR	USBGN	RR	NAM	-25.3333	-49.8333	25	20	0	s	49	50	0	2	OTO	OTO	Localidade-tipo	Ghedotti & Weitzman (1995), Lucinda el ai. (2006).			Atlantic forest	40748.3	Ribeira de Iguape	PARANA	EN	B1a, b i;iii	6	PRN63	26.5819	8	Alto Rio Iguaçu, Serrinha
1	480	Ancistrinae	137	Ancistrus maculatus (Steindachner, 1881)	αbidos e rio Tajapuru.	Espécie conhecida apenas da localidade-tipo.	regi╞o de αbidos, PA	Arcmap	RRT	NAM	-1.8506	-55.4867	1	51	2	s	55	29	12	4	NAM	OTO	Localidade-tipo	Isbrücker (1980).			Amazonia	167941	Amazonas Lowlands	AMAZONICA	EN	B1a, b i;iii	5	AMA01	0	30	Igarape Rio Branco
41	488	Ancistrinae	137	Chaetostoma jegui Rapp Py-Daniel, 1991	Rio Uraricoera, Ilha de Maracá, a jusante do furo de Maracá, bacia do Branco, Brasil.	Espécie conhecida apenas da localidade-tipo.	Rio Uraricoera	USBGN	RRT	NAM	3.0333	-60.5	3	2	0	n	60	30	0	12	OTO	OTO	Localidade-tipo				Amazonia	114447	Amazonas Guiana Shield	AMAZONICA	VU	D2	5	AMA108	35.3861	95	Rio Uraricoera
638	485	Ancistrinae	137	Ancistrus tombador Fisch-Muller, Cardoso, da Silva & Bertaco, 2005	Igarapé Ribeir╞o Preto, na estrada MT-338, ca. De 26 km SE de Porto Dos Gaéchos, Porto dos Gaéchos, Mato Grosso		Igarapé Ribeir╞o preto x Rodovia MT338 em Porto dos Gauchos	Arcmap	RR	OTO	-11.6575	-57.2019	11	39	27	s	57	12	7	14	PAB	PAB: Aperfeiçoar para 11 39 27 s 57 12 07 w (localidade tipo)					Amazonia	256559	Tapajos - Juruena	AMAZONICA	VU	D2	5	AMA64	0	69	Rio Manoel Gomes
769	494	Ancistrinae	137	Hemiancistrus punctulatus Cardoso & Malabarba, 1999	Rio dos Sinos, praia Jo╞o Fernandes, Caraá, sistema da laguna dos Patos, Estado do Rio Grande do Sul, Brasil.	Bacia da laguna dos Patos.	Margem leste da lagoa dos patos	Arcmap	RR	NAM	-29.7911	-50.4342	29	47	28	s	50	26	3	1	PAB	PAB: Corrigir para 29 47 28 s 50 26 03 w (rio dos Sinos em Caraá)	Localidade-tipo				Atlantic forest	60590.4	Laguna dos Patos	ATLANTICO SUL	EN	B1a, b i;iii	5	ASU23	4.00056	18	Rio dos Sinos
132	473	Ancistrinae	137	Ancistrus claro Knaack, 1999	Rio Claro, a montante da ponte em direç╞o a Chapada dos Guimar╞es, Estado do Mato Grosso, Brasil.	Bacia do Cuiabá.	Rio claro	USBGN	RR	NAM	-15.4	-55.9667	15	24	0	s	55	58	0	3	OTO	OTO	Localidade-tipo				CERRADO	65140.6	Paraguay	PARAGUAI	VU	D2	6	PRG03	61.4221	88	Rio Claro
507	479	Ancistrinae	137	Ancistrus jataiensis Fisch-Muller, Cardoso, da Silva & Bertaco, 2005	Córrego Jataí, afluente do Rio Vermelho, bacia do Rio Tocantins	Conhecida somente da localidade tipo		??	RR	OTO	-14.4833	-46.1	14	29	0	s	46	6	0	5	NAM	OTO					CERRADO	16568.1	Tocantins - Araguaia	TOCANTINS-ARAGUAIA	VU	D2	6	TOAR26	95.1999	100	Corrego Cana Brava, Rio Vermelho
726	471	Ancistrinae	137	Ancistrus aguaboensis Fisch-Muller, Mazzoni & Weber, 2001	C6rrego ╡gua Boa, afluente do rio Bonito, alto Tocantins, 13°35'S 48°14W, Brasil.	Bacia do alto Tocantins.	córr Agua boa	Buckup et al 2007	RR	NAM	-13.5833	-48.2333	13	35	0	s	48	14	0	5	NAM	OTO	Localidade-tipo				CERRADO	25509.2	Tocantins - Araguaia	TOCANTINS-ARAGUAIA	VU	D2	5	TOAR63	0	100	Corrego Agua Boa, bacia do Tocantins
43	605	Apteronotidae	149	Sternarchorhynchus caboclo Santana & Nogueira, 2006	Rio Mucajal, abaixo da Cachoeira do Pared╞o 2, Estado de Roraima, Brasil.	Rio Mucacai, no Estado de Roraima.	Rio Mucajaí, Roraima	Fuzzy Gazetteer	RR	NAM	2.4167	-60.8667	2	25	0	n	60	52	0	12	OTO	OTO	Localidade-tipo				Amazonia	16593.8	Amazonas Guiana Shield	AMAZONICA	VU	D2	6	AMA110	0	80	Baixo Rio Mucajaí
753	579	Auchenipteridae	141	Glanidium catharinensis Miranda Ribeiro, 1962	Rio do Braço do Norte, S╞o Ludgero, Tubar╞o, Estado de Santa Catarina, Brasil.	Espécie conhecida apenas da localidade-tipo.	S╞o ludgero SC	CIVI IBGE	RRT	NAM	-28.3258	-49.1767	28	19	33	s	49	10	36	1	PAB	PAB: Espécie é RRT ou RR	Localidade-tipo				Atlantic forest	181029	Southeastern Mata Atlantica	ATLANTICO SUL	EN	B1a, b i;iii	5	ASU06	2.76704	33	Rio Braço do Norte
374	581	Auchenipteridae	141	Glanidium ribeiroi Haseman, 1911	Porto Uni╞o da Vitória, Estado do Paraná, Brasil.	Bacia do Paraná, nos estados do Paraná e de S╞o Paulo.	A 6 km a W de Uni╞o da Vitória no Rio Iguaçu, PR	ARCMAP	RR	OTO	-26.2219	-51.1228	26	13	19	s	51	7	22	1	PAB	PAB	Localidade-tipo				Atlantic forest	34896.8	Iguassu	PARANA	EN	B1a, b i;iii	5	PRN59	7.42492	46	Rio Iguaçu em União da Vitória
236	49	Bryconinae	111	Brycon zsp. 2		Bacia do Pardo.	Bacia do rio Pardo	Mesmas coordenadas de Astyana	RR	NAM	-15.8167	-41.2167	15	30	49	s	41	14	11	8	PAB	PAB: Corrigir para -15.816667 -42.216667 (lote de referência)	Bibliográfica I Lote de referência (MZUSP 58297).	Lima (2001).			Atlantic forest	18934.5	Northeastern Mata Atlantica	ATLANTICO LESTE	VU	D2	6	ALE17	14.6122	92	Corrego Jiçara
472	45	Bryconinae	111	Brycon gouldingi Lima, 2004	19arapé da Boa Vista, afluente do rio itacaiénas, Parauapebas, Serra dos Carajás, Estado do Pará, Brasil.	Bacia do Tocantins.	Igarapé da Boa Vista, afl. Rio Itacaiunas, PA	Coordenadas em Buckup erradas	RR	NAM	-5.5333	-50.5333	5	32	0	s	50	32	0	4	NAM	OTO	Localidade-tipo				Amazonia	266568	Tocantins - Araguaia	TOCANTINS-ARAGUAIA	EN	B1a, b i;iii	4	TOAR05	35.737	79	Alto Rio Itacaiunas
38	319	Callichthyidae	134	Corydoras crimmeni Grant, 1997	Rio Branco próximo a Boa Vista, Estado de Roraima, Brasil.	Bacia do Branco.	Rio Branco, próximo a Boa Vista, RR	Species link - MZUSP	RR	NAM	2.8333	-60.6066	0	0	0		0	0	0	12	OTO		Localidade-tipo	Grant (1997).			Amazonia	15372	Amazonas Guiana Shield	AMAZONICA	VU	D2	5	AMA105	49.5292	88	Afluentes do Rio Branco em Boa Vista
39	321	Callichthyidae	134	Corydoras ephippifer Nijssen, 1972	Córrego Cachoeira, na margem direita do rio Amapari, 4 km a jusante de Casa do Sete, Estado do Amapá, Brasil.	Bacia do Araguari.	Ato Amapari, PN Tumucumaque	ARCMAP	RR	NAM	1.9	-52.4442	1	54	12	n	52	26	39	4	NAM	OTO	Localidade-tipo	Nijssen (1972), Nijssen & Isbrücker (1980b).			Amazonia	104028	Amazonas Guiana Shield	AMAZONICA	VU	D2	5	AMA106	100	100	Alto Amapari
572	301	Callichthyidae	134	Aspidoras depinnai Britto, 2000	Córrego na rodovia Amaraji -Primavera, bacia do Ipojuca, 8°21 'S 35°26'W, Estado de Pernambuco, Brasil.	Bacias costeiras do Nordeste, da bacia do rio Ipojuca até a bacia do rio Un		Buckup et al 2007	RR	NAM	-8.35	-35.4333	8	21	0	s	35	26	0	7	OTO	OTO	Localidade-tipo	Brilto (2000), Evers (2001).			Atlantic forest	339015	Northeastern Caatinga & Coastal Drainages	ATLANTICO NORDESTE ORIENTAL	EN	B1a, b i;iii	4	ANOR08	6.46615	16	Rio Ipojuca
317	322	Callichthyidae	134	Corydoras flaveolus Ihering, 1911	Pequenos riachos afluentes do rio Piracicaba, acima de Salto, 23°10'S 47°16'W, Estado de S╞o Paulo, Brasil.	Bacia do Paraná.	Riachos afluentes rio Piracicaba, SP	Buckup et al. 2007	RR	NAM	-23.1667	-47.2667	23	10	0	s	47	16	0	2	OTO	OTO	Localidade-tipo	Ihering (1911), Nijssen & Isbrücker (1980b).			Atlantic forest	28525	Upper Parana	PARANA	EN	B1a, b i;iii	6	PRN38	0.976661	9	Bacia do Picacicaba acima de Salto
522	297	Callichthyidae	134	Aspidoras albater Nijssen & Isbrücker, 1976	Rio Tocantinzinho próximo a S╞o Jo╞o da Aliança, bacia do Tocantins, 14°46'S 47°30'W, Estado de Goiás, Brasil.	Bacia do Tocantins.		Buckup et al 2007	RR	NAM	-14.7667	-47.5	14	46	0	s	47	30	0	5	NAM	OTO	Localidade-tipo	Nijssen & Isbrücker (1976b).			CERRADO	31584.4	Tocantins - Araguaia	TOCANTINS-ARAGUAIA	VU	D2	6	TOAR36	0	100	Ribeirão das Brancas
524	302	Callichthyidae	134	Aspidoras eurycephalus Nijssen & Isbrücker, 1976	Córrego Vermelho, rio das Almas, afluente do rio Maranh╞o, bacia do Tocantins, cerca de 15°S 49°30'W, Estado de Goiás, Brasil.	Bacia do Tocantins.		Buckup et al 2007	RR	NAM	-15	-49.5	15	0	0	s	49	30	0	5	NAM	OTO	Localidade-tipo				CERRADO	197131	Tocantins - Araguaia	TOCANTINS-ARAGUAIA	EN	B1a, b i;iii	4	TOAR38	0.85832	42	Rio São Patricio
531	325	Callichthyidae	134	Corydoras maculifer Nijssen & Isbrücker, 1971	Riacho Sangadina, 2 km a oeste de Xavantina, afluente do rio das Mortes, 14°45'S 52°20'W, Estado do Mato Grosso, Brasil.	Bacia do Araguaia.		Buckup et al 2007	RR	NAM	-14.75	-52.3333	14	45	0	s	52	20	0	3	OTO	OTO	Localidade-tipo	Nijssen & Isbrücker (1971), Nijssen & Isbrücker (1			CERRADO	128241	Tocantins - Araguaia	TOCANTINS-ARAGUAIA	VU	D2	4	TOAR42	0	93	Corrego Agua Azul
637	52	Characinae	111	Acestrocephalus nigrifasciatus Menezes, 2006	Ro Arinos, bacia do Tapajós, 11 °31 '51 "S 57°25'8"W, Porto dos Gaéchos, Estado do Mato Grosso, Brasil.	Bacia do alto Tapajós.	Rio arinos	Buckup et al 2007	RR	NAM	-11.5308	-57.4189	11	31	51	s	57	25	8	14	PAB	PAB	Localidade-tipo				Amazonia	9090.64	Tapajos - Juruena	AMAZONICA	VU	D2	5	AMA64	0	69	Rio Manoel Gomes
489	51	Characinae	111	Acestrocephalus maculosus Menezes, 2006	Córrego ╡gua Parada, tributário do rio do Peixe, Serra da Mesa, Minaçu, Estado de Goiás, Brasil.	Bacia do alto Tocantins.	rio do peixe, GO	ARCMAP	RR	NAM	-14.465	-48.7439	14	27	54	s	48	44	38	5	NAM	NAM	Localidade-tipo				CERRADO	22453.2	Tocantins - Araguaia	TOCANTINS-ARAGUAIA	VU	D2	6	TOAR16	0	100	Alto Rio do Peixe
729	59	Cheirodontinae	111	Odontostilbe parecis Bürhnhein & Malabarba, 2006	Corredeira Papagaio, BR-174, próximo a BR-364, rio Galera, bacia do alto Guaporé, Estado do Mato Grosso, Brasil.	Rio Galera e rio Novo, na bacia do alto Guaporé.	Rio Galera, em Balneario Galera	Burnheim e Malabarba, 2006	RR	NAM	-14.4831	-59.5853	14	28	59	s	59	35	7	3	OTO	OTO	Localidade-tipo				Amazonia	58550.2	Guapore - Itenez	AMAZONICA	VU	D2	6	AMA80	0	84	Rio Galera
345	56	Cheirodontinae	111	Cheirodon parahybae Eigenmann, 1915	Rio Paraiba, Campos, Estado do Rio de Janeiro, Brasil.	Bacia do Paraiba do Sul.	Rio Paraíba, Campos, RJ	Buckup et al. 2007	RR	NAM	-21.7528	-41.3386	21	45	10	s	41	20	19	8	PAB	PAB: Corrigir para 21 45 10 s 41 20 19 w (rio paraíba do Sul , em Campos)	Localidade-tipo			Categoria de ameaça em listas regionais: Vulneráve	Atlantic forest	107428	Paraiba do Sul	ATLANTICO SUDESTE	EN	B1a, b i;iii	4	ASE10	0	22	Rio Paraíba do Sul, Baixo curso
381	60	Cheirodontinae	111	Spintherobolus leptoura Weitzman & Malabarba, 1999	Rio Quilombo, fazenda Dalila, Registro, Estado de S╞o Paulo, Brasil.	Rio Ribeira de Iguape, Estado de S╞o Paulo, Brasil.	Rio Quilombo, na fazenda Dalila.	Species link MZUSP 51023	RR	NAM	-24.3666	-47.8499	0	0	0		0	0	0	2	OTO	OTO	Localidade-tipo		Estado de Conservaç╞o: Vulnerável.		Atlantic forest	32023.8	Ribeira de Iguape	ATLANTICO SUDESTE	VU	D2	5	ASE23	99.995	91	Rio Quilombo
689	821	Cichlidae	387	Crenicichla mucuryna Ihering, 1914	Rio Todos os Santos, afluente do rio Mucuri, Estado de Minas Gerais, Brasil.	Bacia do Mucuri.	Rio todos os santos, MG	ARCMAP	RR	NAM	-17.8889	-41.3861	17	53	20	s	41	23	10	8	PAB	PAB	Localidade-tipo	Kullander & Lucena (2006).			Atlantic forest	35984.3	Northeastern Mata Atlantica	ATLANTICO LESTE	EN	B1a, b i;iii	6	ALE46	6.48567	16	Rio Todos os Santos
0	796	Cichlidae	387	Apistogramma geisleri Meinken, 1971	Rio Curuçamba, próximo a αbidos, Estado do Amazonas, Brasil.	Bacia do Amazonas, na regi╞o do baixo Trombetas.	Proximidades de obidos	ARCMAP	RR	OTO	-1.8506	-55.4867	1	51	2	s	55	29	12	4	NAM	OTO	Localidade-tipo				Amazonia	167941	Amazonas Lowlands	AMAZONICA	EN	B1a, b i;iii	5	AMA01	0	30	Igarape Rio Branco
595	813	Cichlidae	387	Crenicichla hemera Kullander, 1990	Riacho de cabeceira tributário do rio Cinta Larga, BR-174, a 41 km de Juina, bacia do Aripuan╞, Estado do Mato Grosso, Brasil.	Bacias do Tapajós e do Madeira.	Afluente do Cinta Larga, a cerca de 40 km a W de juína	Arcmap	RR	OTO	-11.4519	-58.9936	11	27	7	s	58	59	37	14	PAB	PAB	Localidade-tipo	Kullander (2003).			Amazonia	55882.5	Madeira Brazilian Shield	AMAZONICA	VU	D2	6	AMA60	0	77	Rio Cinta-larga
792	826	Cichlidae	387	Crenicichla punctata Hensel, 1870	Rio Guaiba, Municipio de Porto Alegre, Estado do Rio Grande do Sul, Brasil.	Bacia da laguna dos Patos, no Brasil e Uruguai.	Porto Alegre, imediaçΣes	Arcmap	RR	NAM	-30.0167	-51.2222	30	1	0	s	51	13	20	1	PAB	PAB: Corrigir para 30 01 00 s 51 13 20 w (Rio Gua'iba, em frente a Porto Alegre)	Localidade-tipo	Kullander & Lucena (2006).			Pampas	32525	Laguna dos Patos	ATLANTICO SUL	EN	B1a, b i;iii	6	ASU43	3.45889	64	Afluentes da Lagoa dos Patos, Rio Guaiba
605	39	Crenuchidae	107	Characidium vidali Travassos, 1967	Rio Soberbo, Barreira, Parque Nacional da Serra dos Org╞os, 400m, terceiro distrito de Magé, Estado do Rio de Janeiro, Brasil.	Bacias costeiras no leste da Baixada Fluminense.	rio Guapimirim, próximo à localidade tipo (P.A.Buckup)	GoogleErth	RR	PAB	-22.495	-42.9964	22	29	42	s	42	59	47	8	PAB	PAB	Localidade-tipo				Atlantic forest	16240.6	Fluminense	ATLANTICO SUDESTE	EN	B1a, b i;iii	6	ASE41	34.3943	49	Bacia do Guapimirim
487	36	Crenuchidae	107	Characidium stigmosum Melo & Buckup, 2002	Riacho tributário do córrego Ave Maria, 47°30'W 13°47'S, próximo à sede da Fazenda Santo Antônio, 14 km ao Norte de Cavalcante, Estado de Goiás, Brasil.	Tributários do rio das Almas, na margem esquerda do Paran╞, bacia do Tocant		Buckup et al 2007	RR	PAB	-13.7833	-47.5	13	47	0	s	47	30	0	5	NAM	PAB	Localidade-tipo				CERRADO	37821.9	Tocantins - Araguaia	TOCANTINS-ARAGUAIA	VU	D2	5	TOAR14	100	100	Córrego Ave Maria
681	509	Delturinae	137	Delturus angulicauda (Steindachner, 1877)	Rio Mucuri em Santa Clara, Estado da Bahia, Brasil.	Drenagem do alto Mucuri.	Rio Mucuri em Sta Clara	Reis et al 2006	RR	NAM	-17.9	-40.2167	17	54	0	s	40	13	0	8	PAB	PAB	Localidade-tipo	Reis et al. (2006).			Atlantic forest	63243.6	Northeastern Mata Atlantica	ATLANTICO LESTE	EN	B1a, b i;iii	6	ALE41	0	29	Rio Mucuri
407	513	Delturinae	137	Hemipsilichthys nimius Pereira, Reis, Souza & Lazzarotto, 2003	Rio Carrasquinho abaixo da Cachoeira do Tobog╞, bacia do alto Perequê-Açu, Penha, ca. 7,5 km a oeste da rodovia BR101, estrada Parati -Cunha, 23°12'51"S 44°47'28"W, Munic. Parati, Estado de	Rio Pereque-Açu e proximidades do rio Taquari, na costa sul do Estado do Ri		Buckup et al 2007	RR	NAM	-23.2142	-44.7911	23	12	51	s	44	47	28	9	OTO	OTO	Localidade-tipo				Atlantic forest	86238.6	Ribeira de Iguape	ATLANTICO SUDESTE	VU	D2	6	ASE27	81.8827	97	Drenagens costerias entre Ubatuba e Parati
684	511	Delturinae	137	Delturus carinotus (La Monte, 1933)	Rio Doce, Estado do Espirito Santo, leste do Brasil.	Bacia do aito Doce.	Bacia do alto Rio doce	Species link MZUSP	RR	NAM	-20.2172	-41.9872	0	0	0		0	0	0	8	PAB	CN	Localidade-tipo	Reis et al. (2006).			Atlantic forest	60575	Northeastern Mata Atlantica	ATLANTICO SUDESTE	EN	B1a, b i;iii	4	ASE54	1.69873	33	Rio Manhuaçu
410	293	Glanapteryginae	134	Listrura picinguabae Villa-Verde & Costa, 2006	Pequeno riacho tributário do rio da Fazenda, em pequena estrada próximo ao Km 11 da rodovia BR-101, Parque Estadual da Serra do Mar, about 23°20'S 44°45'W, Picinguaba, Mun. Ubatuba, Estado d	Bacia do rio da Fazenda em Picinguaba, Estado de S╞o Paulo.	KM 11 BR 101, prox Praia Fazenda. Coordenada em Buckupe et al cai em RJ	Arcmap	RR	NAM	-23.3294	-44.7976	23	19	46	s	44	47	51	9	OTO	OTO	Localidade-tipo				Atlantic forest	86238.6	Ribeira de Iguape	ATLANTICO SUDESTE	VU	D2	6	ASE27	81.8827	97	Drenagens costerias entre Ubatuba e Parati
615	292	Glanapteryginae	134	Listrura nematopteryx de Pinna, 1988	Pequeno manancial de um c6rrego tributário do ribeir╞o Imbariê (tributário do rio Estrela), próximo ao Km 58 da "antiga Rio-Petr6polis (Estrada Autom6vel Club), Piabetá, Magé, Estado do Rio	Drenagens do Estrela e do Iguaçu, tributários da baia de Guanabara.	Piabetá, Estrada Automóvel Club km 58	Species Link MZUSP 63443	RR	NAM	-22.61	-43.1905	0	0	0		0	0	0	8	PAB	PAB	Localidade-tipo	Villa-Verde & Costa (2006).	Estado de Conservaç╞o: Vulnerável.	Categoria de ameaça em listas regionais: Em perigo	Atlantic forest	35481.3	Fluminense	ATLANTICO SUDESTE	EN	B1a, b i;iii	6	ASE45	32.5149	47	Drenagens costeiras em Magé e Duque de Caxias
455	291	Glanapteryginae	134	Listrura boticario de Pinna & Wosiacki, 2002	Poça adjacente do rio da Figueira (tributário do rio Morato, bacia do Guaraqueçaba), na Reserva Particular do Patrimonio Natural Salto Morato, Estado do Paraná, Brasil.	Bacias dos rios da Figueira e Guaraqueçaba, Estado do Paraná.	Poça adjacente ao Rio da Figueira (trib. R. Guaraqueçaba), Reserva Particular do Patrimônio Natural Salto Morato	Species Link MZUSP 69573	RR	NAM	-25.2666	-48.2	0	0	0		0	0	0	2	OTO	OTO	Localidade-tipo				Atlantic forest	38987.8	Southeastern Mata Atlantica	ATLANTICO SUL	VU	D2	6	ASU04	96.9321	99	Bacias costeiras em Guaraqueçaba
382	63	Glandulocaudinae	111	Glandulocauda melanopleura Eigenmann, 1911	Rio Iguaçu, Serrinha, Estado do Paraná, Brasil.	Alto rio Iguaçu, no Estado do Paraná e Estado de Santa Catarina.	Montanhas Serrinha, PR	USBGN	RR	NAM	-25.3333	-49.8333	25	20	0	s	49	50	0	2	OTO	OTO	Localidade-tipo	Menezes & Weitzman (1990).	Estado de Conservaç╞o: Em perigo.	Categoria de ameaça em listas regionais: Em perigo	Atlantic forest	40748.3	Ribeira de Iguape	PARANA	EN	B1a, b i;iii	6	PRN63	26.5819	8	Alto Rio Iguaçu, Serrinha
493	66	Glandulocaudinae	111	Xenurobrycon coracoralinae Moreira, 2005	Rio Agapito, rodovia BR-070, aproximadamente 15° 56'S 50° 09'W, tributário do rio Vermelho, bacia do Araguaia, Municlpio de Goiás, Estado de Goiás, Brasil.	Bacia do Araguaia.		Buckup et al 2007	RR	NAM	-15.9333	-50.15	15	56	0	s	50	9	0	5	NAM	OTO	Localidade-tipo				CERRADO	77643.8	Tocantins - Araguaia	TOCANTINS-ARAGUAIA	EN	B1a, b i;iii	5	TOAR17	14.9346	30	Alto Rio Vermelho
636	43	Hemiodontidae	108	Hemiodus sterni (Géry, 1964)	Alto rio Juruena, afluente do rio Tapajós, Estado do Mato Grosso, Brasil.	Rio Juruena.	Alto rio Juruena, afl. Rio Tapajós, MT	Buckup et al. 2007	RR	NAM	-11.5306	-58.3792	11	31	50	s	58	22	45	14	PAB	PAB Corrigir para 11 31 50 S 58 22 45 W (rio Juruena a leste Juina)	Localidade-tipo	Langeani (1996).			Amazonia	52537.5	Tapajos - Juruena	AMAZONICA	EN	B1a, b i;iii	5	AMA63	0	65	Alto Juruena
346	542	Heptapteridae	138	Pimelodella pectinifer Eigenmann & Eigenmann, 1888	Campos.	Rio Muriaé (afiuente do Paralba do Sul).	Rio Muriaé, Campos Rio de Janeiro	Buckup et al. 2007	RR	NAM	-21.7728	-41.3217	0	0	0		0	0	0	8	PAB	PAB: Corrigir para -21.77284 -41.32169	Bibliográfica.	EIgenmann (1917a), Eigenmann (1917a).			Atlantic forest	107428	Paraiba do Sul	ATLANTICO SUDESTE	EN	B1a, b i;iii	4	ASE10	0	22	Rio Paraíba do Sul, Baixo curso
384	557	Heptapteridae	138	Rhamdiopsis moreirai Haseman, 1911	Serrinha, rio Iguaçu, Estado do Paraná, Brasil.	Bacias do alto Iguaçu e alto Ribeira de Iguape.	Montanhas Serrinha, PR	USBGN	RR	NAM	-25.3333	-49.8333	25	20	0	s	49	50	0	2	OTO	OTO	Localidade-tipo	Bockmann (1998), Wosiacki & Cury (1990).		Categoria de ameaça em listas regionais: Vulneráve	Atlantic forest	40748.3	Ribeira de Iguape	PARANA	EN	B1a, b i;iii	6	PRN63	26.5819	8	Alto Rio Iguaçu, Serrinha
179	551	Heptapteridae	138	Rhamdia enfurnada Bichuette & Trajano, 2005	Gruta do Enfurnado, 13°38'44"S 44°12'05,9"W, bacia do médio S╞o Francisco, povoado de Descoberto, Serra do Ramalho, Municipio de Coribe, Estado da Bahia, Brasil.	Espécie conhecida apenas da localidade-tipo.		Buckup et al 2007	RRT	NAM	-13.6456	-44.2016	13	38	44	s	44	12	6	5	NAM	OTO	Localidade-tipo				CERRADO	52565.5	S. Francisco	S├O FRANCISCO	VU	D2	6	SFR22	0	91	Riacho Enfurnado
426	599	Hypopomidae	148	Brachyhypopomus jureiae Triques & Khamis, 2003	Rio do Descalvado, tributário do rio Una do Prelado, Estaç╞o Ecológica da Juréia, Estado de S╞o Paulo, Brasil.	Espécie conhecida apenas da localidade-tipo.	Rio Una do prelado	USBGN	RRT	NAM	-24.4333	-47.0833	24	26	0	s	47	5	0	2	OTO	OTO	Localidade-tipo	Triques & Khamis (2003).			Atlantic forest	23346.8	Ribeira de Iguape	ATLANTICO SUDESTE	VU	D2	6	ASE36	99.9155	99	Rio Una do Prelado
388	360	Hypoptopomatinae	136	Otothyris juquiae Garavello, Britski & Schaeferi, 1998	Riacho Juquiá na fazenda Cantagalo, Estado de S╞o Paulo, Brasil.	Bacia do Ribeira de Iguape.	Rio Ribeira de Iguape, junto à jusante do rio PilΣes, e 8 km à montante do rio Batatal	Species link MZUSP 45427	RR	NAM	-24.53	-48.1166	0	0	0		0	0	0	2	OTO	OTO	Localidade-tipo	Garavello ai ai. (1998).			Atlantic forest	43003	Ribeira de Iguape	ATLANTICO SUDESTE	VU	D2	5	ASE24	41.2871	74	Rio Ribeira do Iguape
805	346	Hypoptopomatinae	136	Epactionotus gracilis Reis & Schaefer, 1998	Rio Jord╞o em Jord╞o Alto, Nova Veneza, Estado de Santa Catarina, Brasil.	Bacia do Araranguá, Estado de Santa Catarina.	Jord╞o SC	USBGN	RR	NAM	-28.5833	-49.4833	28	35	0	s	49	29	0	1	PAB	PAB	Localidade-tipo	Reis & Schaefer (1998).			Atlantic forest	4033.57	Tramandai - Mampituba	ATLANTICO SUL	CR	B1a, b i;iii	6	ASU46	5.60476	50	Rio Jordão
251	358	Hypoptopomatinae	136	Microlepidogaster perforatus Eigenmann & Eigenmann, 1889	Rio Carandai, Estado de Minas Gerais, Brasil.	Bacia do Carandal, alto Paraná.	Rio Carandaí, MG	Fuzzy Gazetteer	RR	NAM	-20.95	-43.8	20	57	0	s	43	48	0	8	PAB	PAB	Localidade-tipo				Atlantic forest	64501.6	Northeastern Mata Atlantica	PARANA	EN	B1a, b i;iii	6	PRN01	3.01508	25	Rio Carandaí
280	343	Hypoptopomatinae	136	Corumbataia cuestae Britski, 1997	Cachoeira de Anal╞ndia, rio Corumbatai, Anal╞ndia, Estado de S╞o Paulo, Brasil.	Bacia do Tietê.	Analandia, alto corumbatai	ARCMAP	RR	NAM	-22.1611	-47.7066	22	9	40	s	47	42	24	11	NAM	OTO	Localidade-tipo				CERRADO	11762.5	Upper Parana	PARANA	EN	B1a, b i;iii	6	PRN12	99.1116	0	Alto Corumbataí
318	364	Hypoptopomatinae	136	Otothyropsis marapoama Ribeiro, Carvalho & Melo, 2005	Ribeir╞o Cubat╞o, bacia do Tietê, estrada entre Marapoama e Elisiário, 21°11' 35"S 49°07'22"W, Municipio de Marapoama, Estado de S╞o Paulo, Brasil.	Drenagem do Cubat╞o, na bacia do Tietê.		Buckup et al 2007	RR	NAM	-21.1931	-49.1228	21	11	35	s	49	7	22	10	NAM	OTO	Localidade-tipo				Atlantic forest	19453.2	Upper Parana	PARANA	EN	B1a, b i;iii	6	PRN39	0	9	Rio do Cubatão
492	344	Hypoptopomatinae	136	Corumbataia tocantinensis Britski, 1997	Rio Vermelho, Goiás, Estado de Goiás, Brasil.	Bacias do Araguaia e do Tocantins.	Alto Rio Vermelho, em Goiás, GO	ARCMAP	RR	OTO	-15.8994	-50.1061	15	53	58	s	50	6	22	5	NAM	OTO	Localidade-tipo				CERRADO	77643.8	Tocantins - Araguaia	TOCANTINS-ARAGUAIA	EN	B1a, b i;iii	5	TOAR17	14.9346	30	Alto Rio Vermelho
682	850	Hypostominae	136	Pogonopoma wertheimeri (Steindachner, 1867)	Rio Mucuri, Santa Clara, Estado da Bahia, Brasil.	Rios Mucuri, S╞o Mateus e Doce.	Mucuri		RR	OTO	-17.9	-40.2167	17	54	0	s	40	13	0	0		PAB: 17 54 00 s 40 13 00 w (Santa Clara, na bacia do Mucuri. Google)	Localidade-tipo	Armbruster (1998b), Quevedo & Reis (2002).			Atlantic forest	63243.6	Northeastern Mata Atlantica	ATLANTICO LESTE	EN	B1a, b i;iii	6	ALE41	0	29	Rio Mucuri
36	429	Hypostominae	136	Hypostomus simios Hollanda Carvalho & Weber, 2004	Rio Cupixi (estaç╞o nO MIG 84010006), ponte na estrada para Serra do Navio, Estado do Amapá, Brasil.	Espécie conhecida apenas da localidade-tipo.	Rio cupixi	USBGN	RR	NAM	0.65	-51.7833	0	39	0	n	51	47	0	4	NAM	OTO	Localidade-tipo				Amazonia	33116	Amazonas Guiana Shield	AMAZONICA	VU	D2	6	AMA104	16.0892	81	Medio Amapari
37	439	Hypostominae	136	Hypostomus waiampi Hollanda Carvalho & Weber, 2004	Rio Cupixi (estaç╞o nO MIG 84010006), ponte na estrada para Serra do Navio, Estado do Amapá, Brasil.	Espécie conhecida apenas da localidade-tipo.	Rio cupixi	USBGN	RRT	NAM	0.65	-51.7833	0	39	0	n	51	47	0	4	NAM	OTO	Localidade-tipo				Amazonia	33116	Amazonas Guiana Shield	AMAZONICA	VU	D2	6	AMA104	16.0892	81	Medio Amapari
389	413	Hypostominae	136	Hypostomus agna (Miranda Ribeiro, 1907)	Rio da Ribeira, Brasil.	Bacia do Ribeira de Iguape.	Rio Ribeira de Iguape, junto à jusante do rio PilΣes, e 8 km à montante do rio Batatal	Species link MZUSP 45427	RR	NAM	-24.53	-48.1166	0	0	0		0	0	0	2	OTO	OTO	Localidade-tipo				Atlantic forest	43003	Ribeira de Iguape	ATLANTICO SUDESTE	VU	D2	5	ASE24	41.2871	74	Rio Ribeira do Iguape
808	462	Hypostominae	136	Pareiorhaphis stomias Pereira & Reis, 2002	Rio M╞e Luzia em Forquilha, 28°27'66"S 49°30'06"W, bacia do rio Araranguá, Estado de Santa Catarina, Brasil.	Rios Araranguá e Tubar╞o, no sul da regi╞o costeira do Estado de Santa Cata		Buckup et al 2007	RR	OTO	-28.4683	-49.5017	28	27	66	s	49	30	6	1	PAB	PAB	Localidade-tipo				Atlantic forest	11436	Tramandai - Mampituba	ATLANTICO SUL	EN	B1a, b i;iii	6	ASU49	9.05562	57	Rio Mãe Luzia
136	425	Hypostominae	136	Hypostomus mutucae Knaack, 1999	Rio Mutuca, Estado do Mato Grosso, Brasil.	Bacia do Cuiabá.	Rio Mutuca, Bacia do Cuiabá	Species Link MZUSP 27694	RR	NAM	-15.4666	-55.75	0	0	0		0	0	0	3	OTO	OTO	Localidade-tipo				CERRADO	35384.5	Paraguay	PARAGUAI	EN	B1a, b i;iii	6	PRG06	86.6595	66	Bacia do Rio Mutuca, Chapada dos Guimarães
662	438	Hypostominae	136	Hypostomus variostictus (Miranda Ribeiro, 1912)	Coxim, tributário do rio Paraguai, Estado do Mato Grosso, Brasil.	Espécie conhecida apenas da localidade-tipo.	Coxim	Centroide	RRT	NAM	-18.1978	-54.6913	0	0	0		0	0	0	3	OTO	OTO	Localidade-tipo				CERRADO	332825	Paraguay	PARAGUAI	EN	B1a, b i;iii	6	PRG14	0	7	Rio Taquari, medio curso
281	428	Hypostominae	136	Hypostomus paulinus (Ihering, 1905)	Rio Piracicaba, Estado de S╞o Paulo, Brasil.	Bacia do Tietê.	Rio Piracicaba	Species Link MZUSP 14861	RR	NAM	-22.6833	-47.85	0	0	0		0	0	0	11	NAM	OTO	Localidade-tipo	Weber et al. (1992).			CERRADO	41078.3	Upper Parana	PARANA	EN	B1a, b i;iii	6	PRN13	0.182901	2	Rio Piracicaba
475	427	Hypostominae	136	Hypostomus paucipunctatus Hollanda Carvalho & Weber, 2004	Igarapé Pojuca, Serra dos Carajás, rio Itacaiénas, 5°52'S 50032'W, Municipio de Caldeir╞o, Estado do Pará, Brasil.	Bacia do Itacaiénas, Serra dos Carajás, Estado do Pará, Brasil.	Ig. Pojuca, Serra dos Carajás, rio Itacaiunas, PA	Buckup et al. 2007	RR	NAM	-5.8667	-50.5333	5	52	0	s	50	32	0	4	NAM	OTO	Localidade-tipo				Amazonia	74220.9	Tocantins - Araguaia	TOCANTINS-ARAGUAIA	EN	B1a, b i;iii	4	TOAR08	100	100	Igarapé Pojuca e Alto Rio Itacaiunas
494	418	Hypostominae	136	Hypostomus goyazensis (Regan, 1908)	Bacia do Araguaia, alto rio Vermelho, 15°57' 50°07'W, Estado de Goiás, Brasil.	Bacia do Tocantins, na drenagem do rio Araguaia.		Buckup et al 2007	RR	NAM	-15.95	-50.1167	15	57	0	s	50	7	0	5	NAM	OTO	Localidade-tipo	Isbrücker (1973b).			CERRADO	77643.8	Tocantins - Araguaia	TOCANTINS-ARAGUAIA	EN	B1a, b i;iii	5	TOAR17	14.9346	30	Alto Rio Vermelho
443	463	Hypostominae	136	Pareiorhaphis vestigipinnis Pereira & Reis, 1992	Riacho tributário do rio Caveiras em Painel, aproximadamente 27°55'S 50°5'W, na estrada de S╞o Joaquim para Lajes, Estado de Santa Catarina, Brasil.	Cabeceiras do rio Canoas e seus tributários no Estado de Santa Catarina.		Buckup et al 2007	RR	NAM	-27.9167	-50.0833	27	55	0	s	50	5	0	1	PAB	PAB	Localidade-tipo	Pereira & Reis (2002).			Atlantic forest	47915.4	Upper Uruguay	URUGUAI	VU	D2	5	URU05	0	84	Rio das Caveiras
794	420	Hypostominae	136	Hypostomus isbrueckeri Reis, Weber & Malabarba, 1990	Rio Conceiç╞o, Ijui, Estado do Rio Grande do Sul, Brasil.	Alto e médio Uruguai.	Rio Conceiç╞o em Ijui	ARCMAP	RR	OTO	-28.3822	-54.0328	28	22	56	s	54	1	58	1	PAB	PAB	Localidade-tipo	Montoya-Burgos el ai. (2002).			Atlantic forest	104605	Lower Uruguay	URUGUAI	EN	B1a, b i;iii	5	URU25	0	3	Rio Conceição em Ijui
796	435	Hypostominae	136	Hypostomus uruguayensis Reis, Weber & Malabarba, 1990	Rio Uruguai em "Rancho da Amizade", S╞o Borja, Estado do Rio Grande do Sul, Brasil.	Bacia do Uruguai.	Afluente do Uruguai ao N de S╞o Borja	ARCMAP	RR	OTO	-28.5997	-55.9847	28	35	59	s	55	59	5	1	PAB	PAB: Corrigir o ponto, colocando ele no lado brasileiro do rio Uruguai (Caso contrário n╞o entra em nenhuma Otto bacia)	Localidade-tipo	Montoya-Burgos et al. (2002).			Pampas	13572	Lower Uruguay	URUGUAI	EN	B1a, b i;iii	6	URU27	0	10	Afluentes do Uruguai em São Borja
34	109	Incertae	115	Bryconexodon trombetasi Jégu, Santos & Ferreira, 1991	Rio Trombetas, acima da junç╞o do igarapé Caxipacoré, Estado do Pará, Brasil.	Bacia do Trombetas.	Rio Trombetas, acima da junç╞o Ig. Caxipacoré, PA	Species link - MZUSP	RR	NAM	-0.9666	-57.1333	0	0	0		0	0	0	12	OTO	OTO	Localidade-tipo				Amazonia	22178.1	Amazonas Guiana Shield	AMAZONICA	VU	D2	6	AMA103	98.6463	98	Rio Trombetas, Acima do Igarapé Caxipacoré
35	165	Incertae	115	Hyphessobrycon takasei Géry, 1964	Serra do Navio, acima de Macapá, baixo Amazonas, Estado do Amapá, Brasil.	Bacias do Araguarl e do Olapoque.	Rio Cupixi (ponte na estrada para a Serra do Navio, loc coleta MZUSP 29842 (boca de igarapé)	USBGN	RR	NAM	0.65	-51.7833	0	39	0	n	51	47	0	4	NAM	OTO	Localidade-tipo				Amazonia	33116	Amazonas Guiana Shield	AMAZONICA	VU	D2	6	AMA104	16.0892	81	Medio Amapari
644	167	Incertae	115	Hyphessobrycon vilmae Géry, 1966	Bacia do alto Arinos-Juruena, Brasil.	Bacia do alto Tapajós.	Nascentes afluentes do rio Criquirim (afluente do rio dos Patos). Alto Arinos	Species link MZUSP 61128	RR	NAM	-12.0331	-57.6388	12	1	59	s	57	38	20	14	PAB	PAB	Localidade-tipo				Amazonia	127813	Tapajos - Juruena	AMAZONICA	VU	D2	5	AMA68	0	87	Alto Rio Criquirim
652	138	Incertae	115	Hemigrammus skolioplatus Bertaco & Carvalho, 2005	Rio Doze de Outubro na BR-364 entre Comodoro e Vilhena, Municipio de Comodoro, Mato Grosso, Brasil.	Bacia do Juruena, na Chapada dos Parecis.	Rio 12 OutubroxBR364	Arcmap	RR	NAM	-12.9775	-60.0086	12	58	39	s	60	0	31	14	PAB	PAB: Corrigir para 12 58 39 S 60 00 31 W (GPS, Buckup)	Localidade-tipo				CERRADO	20571.8	Tapajos - Juruena	AMAZONICA	VU	D2	6	AMA74	8.22416	93	Rio Doze de Outubro
653	155	Incertae	115	Hyphessobrycon melanostichos Carvalho & Bertaco, 2006	Rio Doze de Outubro, 12°58'39"S 60°00'30''W, BR 364, entre Comodoro e Vilhena, Municipio de Comodoro, Estado do Mato Grosso, Brasil.	Espécie conhecida apenas da localidade-tipo.		Buckup et al 2007	RRT	NAM	-12.9775	-60.0083	12	58	39	s	60	0	30	14	PAB	PAB	Localidade-tipo				CERRADO	20571.8	Tapajos - Juruena	AMAZONICA	VU	D2	6	AMA74	8.22416	93	Rio Doze de Outubro
654	158	Incertae	115	Hyphessobrycon notidanos Carvalho & Bertaco, 2006	Rio Doze de Outubro, 12°58'39"S 60°00'30''W, BR 364, entre Comodoro e Vilhena, Municipio de Comodoro, Estado do Mato Grosso, Brasil.	Espécie conhecida apenas da localidade-tipo.		Buckup et al 2007	RRT	NAM	-12.9775	-60.0083	12	58	39	s	60	0	30	14	PAB	PAB	Localidade-tipo				CERRADO	20571.8	Tapajos - Juruena	AMAZONICA	VU	D2	6	AMA74	8.22416	93	Rio Doze de Outubro
655	149	Incertae	115	Hyphessobrycon hexastichos Bertaco & Carvalho, 2005	Rio Mutum na BR 364 para a cidade de Vilhena, 13°05'08"S 59°53'32"W, tributário do rio Juruena, bacia do alto Tapajós, Municipio de Comodoro, Estado do Mato Grosso, Brasil.	Espécie conhecida apenas da localidade-tipo.		Buckup et al 2007	RRT	NAM	-13.0856	-59.8922	13	5	8	s	59	53	32	14	PAB	PAB	Localidade-tipo				CERRADO	34615.5	Tapajos - Juruena	AMAZONICA	VU	D2	6	AMA75	69.015	97	Rio Mutum, bacia do Juruena
239	93	Incertae	115	Astyanax pedri Eigenmann, 1908	Rio Santo Antônio, alto rio Doce, Ferros, Estado de Minas Gerais, Brasil.	Rio Santo Antonio, Estado de Minas Gerais.	Ferros	CIVI IBGE	RR	NAM	-19.2319	-43.0264	19	13	55	s	43	1	35	8	PAB	PAB: Corrigir para 19 13 55 43 01 35 w	Localidade-tipo				Atlantic forest	28478.1	Northeastern Mata Atlantica	ATLANTICO SUDESTE	EN	B1a, b i;iii	4	ASE04	5.5603e-05	32	Rio Santo Antonio
387	96	Incertae	115	Astyanax ribeirae Eigenmann, 1911	Xiririca [=Eldorado, Estado de S╞o Paulo], Brasil.	Bacia do Ribeira de Iguape.	Eldorado	CIVI IBGE	RR	NAM	-24.52	-48.1081	24	31	12	s	48	6	29	2	OTO	OTO	Localidade-tipo				Atlantic forest	43003	Ribeira de Iguape	ATLANTICO SUDESTE	VU	D2	5	ASE24	41.2871	74	Rio Ribeira do Iguape
406	146	Incertae	115	Hyphessobrycon griemi Hoedeman, 1957	Estado de Goiás [localidade presumivelmente errada].	Rios costeiros do Estado de S╞o Paulo ao Estado de Santa Catarina.	Bertioga	Species Link lote 87680.0	RR	OTO	-23.85	-46.2166	0	0	0		0	0	0	9	OTO	OTO	Localidade-tipo	Weitzman el ai. (1988).			Atlantic forest	45820	Ribeira de Iguape	ATLANTICO SUDESTE	VU	D2	6	ASE26	42.1989	94	Bacias costeiras em Bertioga
606	105	Incertae	115	Bryconamericus ornaticeps Bizerril & Peres-Neto, 1995	Rio Macacu, Município de Cachoeira do Macacu, Estado do Rio de Janeiro, Brasil.	Rio Macacu.	Rio Macacu, Cachoeiras de Macacu, RJ	Species link - MZUSP	RR	NAM	-22.4666	-42.6666	0	0	0		0	0	0	8	PAB	PAB	Localidade-tipo				Atlantic forest	44412.8	Fluminense	ATLANTICO SUDESTE	EN	B1a, b i;iii	6	ASE42	35.0532	51	Rio Macacu
756	103	Incertae	115	Bryconamericus lambari Malabarba & Kindel, 1995	Arroio desaguando no arroio Fe~oria, embaixo da ponte da avenida Ipiranga, 29°36'S 51°01'W, Municipio de Dois Irm╞os, Estado do Rio Grande do Sul, Brasil.	Bacia do Cai, sistema da laguna dos Patos.		Buckup et al 2007	RR	NAM	-29.6	-51.0167	29	36	0	s	51	1	0	1	PAB	PAB: Corrigir para 29 36 00 s 51 01 00 w	Localidade-tipo		Estado de Conservaç╞o: Vulnerável.	Categoria de ameaça em listas regionais: Vulneráve	Atlantic forest	30565.7	Laguna dos Patos	ATLANTICO SUL	EN	B1a, b i;iii	6	ASU17	0	41	Afluentes do Alto Rio Caí
773	90	Incertae	115	Astyanax obscurus (Hensel, 1870)	Porto Alegre, Estado do Rio Grande do Sul, Brasil.	Bacia da laguna do Patos.	Porto Alegre, imediaçΣes	Arcmap	RR	NAM	-30.0589	-51.1664	30	3	32	s	51	9	59	1	PAB	PAB	Localidade-tipo	Meio & Buckup (2006).			Pampas	264582	Laguna dos Patos	ATLANTICO SUL	EN	B1a, b i;iii	5	ASU27	0	21	Drenagens ao Norte da Lagoa dos Patos
812	102	Incertae	115	Bryconamericus ecai Pezzi da Silva, 2004	Arroio na linha Brasil, paralela a estrada de Vila Deodoro a Ven╞ncio Aires (afluente do arroio Castelhano, rio Taquari, drenagem da laguna dos Patos), Ven╞ncio Aires, Rio Grande do Sul, Bra	Espécie conhecida apenas da localidade-tipo.	Rio Taquari,RS	USBGN	RRT	NAM	-29.5494	-52.2703	29	32	58	s	52	16	13	1	PAB	PAB: Corrigir para 29 32 58 S 52 16 13 W (estrada para linha Brasil)	Localidade-tipo				Atlantic forest	75706.3	Laguna dos Patos	ATLANTICO SUL	EN	B1a, b i;iii	6	ASU53	0	32	Arroio Castelhano
131	75	Incertae	115	Astyanacinus moorii (Boulenger, 1892)	Chapala Plateau [Chapada dos Guimar╞es?], Estado do Mato Grosso, Brasil.	Bacia do alto Paraguai.	PN Chapada Dos Guimar╞es, no Alto Paraguai, Alto Coxipó	ARCMAP	RR	NAM	-15.3201	-55.8335	15	19	13	s	55	50	1	3	OTO	OTO	Localidade-tipo				CERRADO	65140.6	Paraguay	PARAGUAI	VU	D2	6	PRG03	61.4221	88	Rio Claro
692	132	Incertae	115	Hasemania crenuchoides Zarske & Géry, 1999	Córrego Planaltina, médio rio S╞o Bartolomeu, que deságua no rio Corumbá, afluente do rio Paranalba, perto de Planaltina, a nordeste de Brasilia, Distrito Federal, Brasil, aproximadamente 15	Alto rio Paranalba.		Buckup et al 2007	RR	NAM	-15.6333	-47.6667	15	38	0	s	47	40	0	5	NAM	OTO	Localidade-tipo				CERRADO	82360.3	Upper Parana	PARANA	EN	B1a, b i;iii	6	PRN07	94.7907	41	Alto São Bartolomeu
693	140	Incertae	115	Hyphessobrycon balbus Myers, 1927	Planaltina, Lagoa Fervedeira [Distrito Federal, Brasil}.	Bacia do alto Paranaiba.	Lagoa fervedeira	MCZ fish collection	RR	NAM	-15.6425	-47.6306	15	38	33	s	47	37	50	5	NAM	OTO	Localidade-tipo				CERRADO	82360.3	Upper Parana	PARANA	EN	B1a, b i;iii	6	PRN07	94.7907	41	Alto São Bartolomeu
690	142	Incertae	115	Hyphessobrycon coelestinus Myers, 1929	Lagoa Bonita no rio S╞o Bartolomeu, Estado de Goiás, Brasil.	Bacia do alto Paranaiba.	Planaltina lagoa mestre d'armas EE Aguas Emandadas, bacia platina	Arcmap	RR	NAM	-15.5795	-47.6916	15	34	46	s	47	41	30	5	NAM	OTO	Localidade-tipo				CERRADO	82360.3	Upper Parana	PARANA	EN	B1a, b i;iii	6	PRN07	94.7907	41	Alto São Bartolomeu
691	200	Incertae	115	Oligosarcus planaltinae Menezes & Géry, 1983	Córrego Planaltina, tributário do rio S╞o Bartolomeu, próximo de Brasllia, Distrito Federal, Brasil.	Bacia do Parnaiba, Estado de Goiás.	Planaltina DF	?	RR	NAM	-15.6081	-47.5247	15	36	29	s	47	31	29	5	NAM	OTO	Localidade-tipo	Menezes & Géry (1983).			CERRADO	82360.3	Upper Parana	PARANA	EN	B1a, b i;iii	6	PRN07	94.7907	41	Alto São Bartolomeu
383	166	Incertae	115	Hyphessobrycon taurocephalus Ellis, 1911	Serrinha, rio Iguaçu, Estado do Paraná, Brasil.	Bacia do Iguaçu.	Montanhas Serrinha, PR	USBGN	RR	NAM	-25.3333	-49.8333	25	20	0	s	49	50	0	2	OTO	OTO	Localidade-tipo	Eigenmann (1918).	Estado de conselVaç╞o: Criticamente em perigo.	Categoria de ameaça em iistas regionais: Deficient	Atlantic forest	40748.3	Ribeira de Iguape	PARANA	EN	B1a, b i;iii	6	PRN63	26.5819	8	Alto Rio Iguaçu, Serrinha
161	205	Incertae	115	Stigichthys typhlops Brittan & Böhlke, 1965	Jaiba, Estado de Minas Gerais, Brasil.	╡guas subterr╞neas da drenagem do córrego Escuro, afluente do rio Verde Gra	Corrego escuro, Jaiba, MG	Arcmap	RR	NAM	-15.3725	-43.7572	15	22	21	s	43	45	26	8	PAB	PAB	Localidade-tipo		Estado de Conservaç╞o: Vulnerável.		CERRADO	37256.4	S. Francisco	S├O FRANCISCO	EN	B1a, b i;iii	5	SFR14	46.6901	0	Bacia do Córrego Escuro
490	110	Incertae	115	Caiapobrycon tucurui Malabarba & Vari, 2000	rio do Peixe, 14°28'S 48°45'W, tributário do rio Maranh╞o, Niquelândia, Estado de Goiás, Brasil.	Bacia do Tocantins.		Buckup et al 2007	RR	NAM	-14.4667	-48.75	14	28	0	s	48	45	0	5	NAM	OTO	Localidade-tipo				CERRADO	22453.2	Tocantins - Araguaia	TOCANTINS-ARAGUAIA	VU	D2	6	TOAR16	0	100	Alto Rio do Peixe
491	112	Incertae	115	Creagrutus atrisignum Myers, 1927	Alto rio Maranh╞o, bacia do alto Tocantins, Estado de Goiás, Brasil.	Bacia do Maranh╞o, Estado de Goiás.	╟lto rio Maranh╞o, bacia do Tocantins, GO	Buckup et al. 2007	RR	NAM	-14.4667	-48.75	14	28	0	s	48	45	0	5	NAM	OTO	Localidade-tipo	Myers (1927).			CERRADO	22453.2	Tocantins - Araguaia	TOCANTINS-ARAGUAIA	VU	D2	6	TOAR16	0	100	Alto Rio do Peixe
495	74	Incertae	115	Astyanacinus goyanensis Miranda Ribeiro, 1944	Rio do Couro, Veadeiros, Estado de Goiás, Brasil.	Bacia do alto Tocantins.	Rio do Couro GO	USBGN	RRT	PAB	-14.3667	-47.7833	14	22	0	s	47	47	0	5	NAM	OTO	Localidade-tipo				CERRADO	27125	Tocantins - Araguaia	TOCANTINS-ARAGUAIA	VU	D2	5	TOAR18	56.2943	100	Rio dos Couros
506	147	Incertae	115	Hyphessobrycon hamatus Bertaco & Malabarba, 2005	Córrego Cana Brava, tributário do rio Vermelho, bacia do Tocantins, 14°29'S 46°6'W, Mabai, Estado de Goiás, Brasil.	Espécie conhecida apenas da localidade-tipo.		Buckup et al 2007	RRT	NAM	-14.4833	-46.1	14	29	0	s	46	6	0	5	NAM	OTO	Localidade-tipo				CERRADO	16568.1	Tocantins - Araguaia	TOCANTINS-ARAGUAIA	VU	D2	6	TOAR26	95.1999	100	Corrego Cana Brava, Rio Vermelho
70	398	Loricariinae	136	Rineloricaria castroi Isbrücker & Nijssen, 1984	Trapiche da Reserva Biológica de Trombetas, rio Trombetas, Estado do Pará, Brasil.	Rio Trombetas.	Rio Trombetas, PA	Fuzzy Gazetteer	RR	NAM	-1.1886	-56.6708	1	11	19	s	56	40	15	12	OTO	OTO	Localidade-tipo				Amazonia	54174.9	Amazonas Lowlands	AMAZONICA	VU	D2	6	AMA117	100	98	Bacia do Trombetas, na REBIO Trombetas
661	401	Loricariinae	136	Rineloricaria hoehnei (Miranda Ribeiro, 1912)	Rio Paraguai, Coxim, Estado do Mato Grosso, Brasil.	Espécie conhecída apenas da localidade-tipo.	Coxim	CIVI IBGE	RRT	NAM	-18.5067	-54.76	18	30	24	s	54	45	36	3	OTO	OTO	Localidade-tipo				CERRADO	196866	Paraguay	PARAGUAI	EN	B1a, b i;iii	5	PRG13	1.57726	38	Rio Taquari, Baixo curso
351	341	Neoplecostominae	136	Neoplecostomus variipictus Bizerril, 1995	Rio Santo Antônio, tributário do rio Bengala, bacia do Paraíba do Sul, Friburgo, Estado do Rio de Janeiro, Brasil.	Rio Santo Antonio, tributário do rio Bengala (bacia do Paraíba do Sul).	Drenagem vizinha a Friburgo, Alto Paraiba do Sul	Arcmap	RR	NAM	-22.3064	-42.5911	22	18	23	s	42	35	28	8	PAB	PAB	Localidade-tipo			Categoria de ameaça em listas regionais: Vulneráve	Atlantic forest	22297	Paraiba do Sul	ATLANTICO SUDESTE	EN	B1a, b i;iii	5	ASE14	16.972	56	Rio Santo Antonio e Bengala
483	3	Parodontidae	102	Apareiodon tigrinus Pavanelli & Britski, 2003	Córreg0 do Jacaré, perto da ponte, Município de Santa Rita do Araguaia, Estado de Goiás, Brasil.	Bacia do alto Araguaia.	Afluente da margem direita do Araguaia, em Sta Rita do Araguaia	ARCMAP	RR	NAM	-17.2907	-53.0989	17	17	26	s	53	5	56	3	OTO	OTO	Localidade-tipo	Pavanelli & Britski (2003).			CERRADO	12500	Tocantins - Araguaia	TOCANTINS-ARAGUAIA	VU	D2	6	TOAR11	0	100	Corrego do Jacaré, Bacia do Araguaia
358	571	Pimelodidae	139	Steindachneridion parahybae (Steindachner, 1876)	Rio Paraiba próximo a Juiz de Fora; rio Jequitinhonha, Brasil.	Bacia do Paraiba do Sul.	Rio Paraiba do Sul em tres rios RJ	Arcmap	RR	OTO	-22.1246	-43.198	22	7	29	s	43	11	53	8	PAB	PAB	Localidade-tipo	Garavello (2005).	Estado de Conservaç╞o: Criticamente em perigo.	Categoria de ameaça em listas regionais: Provavelm	Atlantic forest	15340.6	Paraiba do Sul	ATLANTICO SUDESTE	EN	B1a, b i;iii	6	ASE19	0	10	Rio Paraiba do Sul em TrÛs Rios
713	565	Pimelodidae	139	Pimelodus atrobrunneus Vidal & Lucena, 1999	Rio Ligeiro na estrada entre Marcelino Ramos e Maximiliano de Almeida, Marcelino Ramos, 27°38'S 51°52'W, Estado do Rio Grande do Sul, Brasil.	Bacia do alto Uruguai.		Buckup et al 2007	RR	NAM	-27.6333	-51.8667	27	38	0	s	51	52	0	1	PAB	PAB	Localidade-tipo				Atlantic forest	42762.3	Upper Uruguay	URUGUAI	EN	B1a, b i;iii	6	URU21	0	7	Rio Ligeiro em Maximilianode Almeida
408	770	Poeciliidae	251	Phalloceros zsp. G		Bacia do Parati-Mirim, no Estado do Rio de Janeiro.	Bacia do Parati-Mirim, Rio de Janeiro	Arcmap	RR	NAM	-23.2736	-44.6864	23	16	25	s	44	41	11	9	OTO	PAB	Lote de referência (MNRJ 23607).	Lucinda & Reis (2005).			Atlantic forest	86238.6	Ribeira de Iguape	ATLANTICO SUDESTE	VU	D2	6	ASE27	81.8827	97	Drenagens costerias entre Ubatuba e Parati
411	776	Poeciliidae	251	Phalloceros zsp. S		Córrego da Toca do Boi, próximo ao Condominio Laranjeiras, Parati, no Estad	Cond laranjeiras, imediaçΣes	Arcmap	RR	NAM	-23.3353	-44.6819	23	20	7	s	44	40	55	9	OTO	PAB	Lote de referência (MNRJ 23609).	Lucinda & Reis (2005).			Atlantic forest	86238.6	Ribeira de Iguape	ATLANTICO SUDESTE	VU	D2	6	ASE27	81.8827	97	Drenagens costerias entre Ubatuba e Parati
464	773	Poeciliidae	251	Phalloceros zsp. N		╡reas alagadas nas margens da rodovias da rodovia PR-340 e rio Dois de Feve	localidade indefinida	Fuzzy Gazetteer	RR	NAM	-25.4119	-48.7722	25	24	43	s	48	46	20	2	OTO	PAB: Aperfeiçoar para 25 24 43 s 48 46 20 w (PR-340 próximo a Antonina)	Lote de referência (MCP 30402).	Lucinda & Reis (2005).			Atlantic forest	19592.2	Southeastern Mata Atlantica	ATLANTICO SUL	VU	D2	6	ASU08	23.0922	92	Drenagens do sistema de Paranaguá, Em Antonina
465	777	Poeciliidae	251	Phalloceros zsp. T		Bacias costeiras que drenam para as baías de Guaratuba e Paranaguá.	Rio S╞o Jo╞o	Arcmap	RR	NAM	-25.9139	-48.5861	25	54	50	s	48	35	10	1	PAB	PAB: Corrigir para 25 54 50 s 48 35 10 w (vizinhaças de Guaratuba)	Lote de referência (MZUSP 79670).	Lucinda & Reis (2005).			Atlantic forest	18303.2	Southeastern Mata Atlantica	ATLANTICO SUL	VU	D2	6	ASU09	90.9184	89	Drenagens do sistema de Paranaguá e Guaratuba
724	775	Poeciliidae	251	Phalloceros zsp. R		Riacho próximo a Itapoá, S╞o Francisco do Sul, no Estado de Santa Catarina.	Rio Saí Mirim SF do Sul	ARCMAP	RR	NAM	-26.1892	-48.7033	26	11	21	s	48	42	12	1	PAB	PAB	Lote de referência (MZUSP 79669).	Lucinda & Reis (2005).			Atlantic forest	22624.9	Southeastern Mata Atlantica	ATLANTICO SUL	VU	D2	6	ASU13	0	76	Rio Saí-Mirim
331	781	Poeciliidae	251	Phallotorynus pankalos Lucinda, Rosa & Reis, 2005	Riacho na Fazenda Sossego, tributário do rio Puitá, afluente do rio Iguatemi, bacia do Paraná, estrada para Paranhos, Tacuru, Estado de Mato Grosso do Sul, Brasil.	Espécie conhecida apenas da localidade-tipo.	Afuente Rio iguatemixestrada Paranhos-Tacuru	Arcmap	RRT	NAM	-23.7584	-55.2123	23	45	30	s	55	12	44	3	OTO	OTO	Localidade-tipo	Lucinda et al. (2005).			Atlantic forest	178665	Upper Parana	PARANA	EN	B1a, b i;iii	6	PRN49	99.1625	63	Bacia do Iguatemi
385	757	Poeciliidae	251	Cnesterodon carnegiei Haseman, 1911	Serrinha, Estado do Paraná, Brasil.	Bacia do aito Iguaçu.	Montanhas Serrinha, PR	USBGN	RR	NAM	-25.3333	-49.8333	25	20	0	s	49	50	0	2	OTO	OTO	Localidade-tipo	Rosa & Costa (1993), Lucinda & Garavello (2000), L		Categoria de ameaça em listas regionais: Vulneráve	Atlantic forest	40748.3	Ribeira de Iguape	PARANA	EN	B1a, b i;iii	6	PRN63	26.5819	8	Alto Rio Iguaçu, Serrinha
484	767	Poeciliidae	251	Phalloceros zsp. D		Bacia do alto Araguaia.	Santa Rita do Araguaia	ARCMAP	RRT	NAM	-17.2907	-53.0989	17	17	26	s	53	5	56	3	OTO	PAB: Sp é RRD. Deletar.	Lote de referência (MCP 30551).	Lucinda & Reis (2005).			CERRADO	12500	Tocantins - Araguaia	TOCANTINS-ARAGUAIA	VU	D2	6	TOAR11	0	100	Corrego do Jacaré, Bacia do Araguaia
608	522	Pseudopimelodidae	137	Microglanis nigripinnis Bizerril & Perez-Neto, 1992	Rio Macacu, Estado do Rio de Janeiro, Brasil.	Rio Macacu,	Rio Macacu, Rio de Janeiro	Species link MZUSP	RR	NAM,PAB	-22.4666	-42.6666	0	0	0		0	0	0	8	PAB	PAB	Localidade-tipo			Categoria de ameaça em listas regionais: Vulneráve	Atlantic forest	44412.8	Fluminense	ATLANTICO SUDESTE	EN	B1a, b i;iii	6	ASE42	35.0532	51	Rio Macacu
683	650	Rivulidae	250	Leptolebias leitaoi (Cruz & Peixoto, 1991)	Rio Mucuri, Estado da Bahia, Brasil.	Bacia do Mucuri, sul do Estado da Bahia.	Rio Mucuri prox foz	Arcmap	RR	NAM	-18.0983	-39.6374	18	5	54	s	39	38	15	8	PAB	PAB	Localidade-tipo		Estado de Conservaç╞o: Criticamente em perigo.		Atlantic forest	63243.6	Northeastern Mata Atlantica	ATLANTICO LESTE	EN	B1a, b i;iii	6	ALE41	0	29	Rio Mucuri
686	734	Rivulidae	250	Simpsonichthys myersi (Carvalho, 1971)	Conceiç╞o da Barra, Estado do Espírito Santo, Brasil.	Bacias costeiras do norte do Estado do Espírito Santo e sul do Estado da Ba	N de Conceiç╞o da Barra, prox, PE itaunas	Arcmap	RR	NAM	-18.4953	-39.7378	18	29	43	s	39	44	16	8	PAB	PAB	Localidade-tipo	Costa (1995b).	Estado de Conservaç╞o: Em perigo.	Categoria de ameaça em listas regionais: Criticame	Atlantic forest	529844	Northeastern Mata Atlantica	ATLANTICO LESTE	VU	B1a, b i;iii	4	ALE43	1.75512	8	Bacias costeiras no norte do Espirito Santo
105	624	Rivulidae	250	Austrolebias varzeae Costa, Reis & Behr, 2004	Lagoa temporária junto ao rio da Várzea, bacia do Uruguai, Fazenda dos Branda, 8°18' S 52° 48'W, Carazinho, Estado do Rio Grande do Sul, Brasil.	Bacia do Várzea, no sistema do alto Uruguai.		Buckup et al 2007	RR	NAM	-8.3	-52.8	8	18	0	s	52	48	0	4	NAM	OTO	Localidade-tipo	Costa (2006a).			Amazonia	75240.4	Xingu	AMAZONICA	VU	D2	6	AMA40	99.9676	100	Igarapé São Pedro
635	697	Rivulidae	250	Rivulus modestus Costa, 1991	Rio Mutum, Comodoro, Estado do Mato Grosso, Brasil.	Bacia do Tapajós.	Alto curso de afluente do Guapore, na chapada dos Parecis, em Comodoro	Arcmap	RR	OTO	-13.6561	-59.7931	13	39	22	s	59	47	35	3	OTO	OTO	Localidade-tipo	Costa (1 995a).			Amazonia	232003	Guapore - Itenez	AMAZONICA	VU	D2	6	AMA62	22.5769	72	Rio Piolho
359	651	Rivulidae	250	Leptolebias marmoratus (Ladiges, 1934)	Rio de Janeiro, Brasil.	Baixadas costeiras ao fundo da baia de Guanabara, Rio de Janeiro.	Vila de Cava, RJ (localidade do neótipo)	Costa 2002	RR	NAM	-22.6583	-43.4294	22	39	30	s	43	25	46	8	PAB	PAB	Localidade-tipo	Costa (1995b), Costa (2002b).	Estado de Conservaç╞o: Criticamente em perigo.	Categoria de ameaça em listas regionais: Possivelm	Atlantic forest	46009.4	Paraiba do Sul	ATLANTICO SUDESTE	EN	B1a, b i;iii	5	ASE20	17.9815	38	Bacias costeiras em Nova Iguaçu
413	627	Rivulidae	250	Campellolebias dorsimaculatus Costa, Lacerda & Brasil, 1989	Poça temporária ma margem da floresta [próximo a Icapara, bacia do baixo ribeira de Iguape], 24°37'S 47°30'W [corretamente 24°40'0.4"S 47°26'4,4"W. altitude 10 m], Iguape. Estado de S╞o Paul	Bacia do baixo Ribeira de Iguape.	Foz do Rio Iguape, Arcmap	Arcmap	RRT	NAM	-24.6314	-47.3889	24	37	53	s	47	23	20	2	OTO	OTO	Localidade-tipo	Costa (1995c). Casciotta el ai. (2001).	Estado de Conservaç╞o: Vulnerável.	Categoria de ameaça em listas regionais: Vulneráve	Atlantic forest	119891	Ribeira de Iguape	ATLANTICO SUDESTE	VU	D2	5	ASE28	38.5785	85	Rio Una da LAdeia e Foz do Ribeira de Iguape
415	702	Rivulidae	250	Rivulus santensis Köhler, 1906	Santos, Estado de S╞o Paulo, Brasil.	Bacias costeiras dos estados de S╞o Paulo e Paraná.	Santos	CIVI IBGE	RR	OTO	-23.9608	-46.3336	23	57	39	s	46	20	1	9	OTO	OTO	Localidade-tipo	Costa (1991c).			Atlantic forest	19056.2	Ribeira de Iguape	ATLANTICO SUDESTE	EN	B1a, b i;iii	5	ASE29	3.12623	33	Bacias costeiras em Santos
616	653	Rivulidae	250	Leptolebias opalescens (Myers, 1942)	Raiz da Serra, Estado do Rio de Janeiro, Brasil.	Bacias costeiras ao fundo da bala de Guanabara, Rio de Janeiro.	Raiz da Serra	Costa 2002	RR	NAM	-22.6167	-43.2	22	37	0	s	43	12	0	8	PAB	PAB	Localidade-tipo	Costa & Lacerda (1988).	Estado de Conservaç╞o: Criticamente em perigo.	Categoria de ameaça em listas regionais: Criticame	Atlantic forest	35481.3	Fluminense	ATLANTICO SUDESTE	EN	B1a, b i;iii	6	ASE45	32.5149	47	Drenagens costeiras em Magé e Duque de Caxias
617	654	Rivulidae	250	Leptolebias splendens (Myers, 1942)	Raiz da Serra, Estado do Rio de Janeiro, Brasil.	Bacias costeiras ao fundo da baia de Guanabara, Rio de Janeiro.	Raiz da Serra	Costa 2002	RR	NAM	-22.6167	-43.2	22	37	0	s	43	12	0	8	PAB	PAB	Localidade-tipo	Costa & Lacerda (1988).	Estado de Conservaç╞o: Criticamente em perigo.	Categoria de ameaça em listas regionais: Possivelm	Atlantic forest	35481.3	Fluminense	ATLANTICO SUDESTE	EN	B1a, b i;iii	6	ASE45	32.5149	47	Drenagens costeiras em Magé e Duque de Caxias
791	643	Rivulidae	250	Cynopoecilus nigrovittatus Costa, 2002	Banhado do rio Cal. Estado do Rio Grande do Sul. Brasil.	Bacia do Jacul. sistema laguna dos Patos. Brasil.		Costa 2002	RR	NAM	-29.75	-51.5	29	45	0	s	51	30	0	1	PAB	PAB	Localidade-tipo				Pampas	72502.9	Laguna dos Patos	ATLANTICO SUL	EN	B1a, b i;iii	5	ASU42	0	76	Bacia do Rio Caí
128	680	Rivulidae	250	Plesiolebias glaucopterus (Costa & Lacerda, 1988)	Cáceres, Estado do Mato Grosso, Brasil.	Bacia do Paraguai.	Rio Paraguai a montante de Cáceres	ARCMAP	RR	OTO	-15.8898	-57.5958	15	53	23	s	57	35	45	3	OTO	OTO	Localidade-tipo	Costa (1998a).			Amazonia	410254	Paraguay	PARAGUAI	EN	B1a, b i;iii	5	PRG01	5.96731	61	Rio Paraguai na Serra das Araras
129	684	Rivulidae	250	Pterolebias phasianus Costa, 1988	Cáceres, Estado do Mato Grosso, Brasil.	Bacia do Paraguai.	Rio Paraguai a montante de Cáceres	ARCMAP	RR	OTO	-15.8899	-57.5956	15	53	24	s	57	35	44	3	OTO	OTO	Localidade-tipo	Costa (2005).			Amazonia	410254	Paraguay	PARAGUAI	EN	B1a, b i;iii	5	PRG01	5.96731	61	Rio Paraguai na Serra das Araras
287	670	Rivulidae	250	Pituna brevirostrata Costa, 2007	Várzea do rio Meia Ponte, 16°38?29.8?S, 49°15?28.4?W, altitude aproximada 750 m, Goiânia, Estado de Goiás.	Espécie conhecida apenas da localidade-tipo.	Localidade-tipo	Costa et al 2007	RR	PAB	-16.6416	-49.2569	16	38	30	s	49	15	25	5	NAM	PAB	Localidade-tipo				CERRADO	192311	Upper Parana	PARANA	EN	B1a, b i;iii	6	PRN17	1.51388	0	Rio Meia Ponte
288	686	Rivulidae	250	Rivulus apiamici Costa, 1989	Bataguaçu, Estado de Mato Grosso do Sul, Brasil.	Bacia do médio Paraná, Brasil.	Córrego buriti, afluente do Paraná em Bataguassu, MS	Arcmap	RR	OTO	-21.7269	-52.9023	21	43	37	s	52	54	8	3	OTO	OTO	Localidade-tipo				CERRADO	37909.1	Upper Parana	PARANA	EN	B1a, b i;iii	6	PRN18	0	0	Corrego Buriti e Aldeia
375	611	Rivulidae	250	Austrolebias carvalhoi (Myers, 1947)	Bacia rio Iguaçu, perto de Porto Uni╞o, Estado de Santa Catarina, Brasil.	Bacia do alto Iguaçu.	porto uni╞o	CIVI IBGE	RR	NAM	-26.2381	-51.0783	26	14	17	s	51	4	42	1	PAB	PAB	Documentaç╞o prímária: Localidade-tipo.	Costa (1998c), Costa (2006a).	Estado de Conservaç╞o: Criticamente em perigo.	Categoria de ameaça em listas regionais: Criticame	Atlantic forest	146091	Iguassu	PARANA	EN	B1a, b i;iii	5	PRN59	7.42492	46	Rio Iguaçu em União da Vitória
154	725	Rivulidae	250	Simpsonichthys hellneri (Berkenkamp, 1993)	Estrada Itacarambi-Manga, Estado de Minas Gerais, Brasil.	Bacia do S╞o Francisco.	Estrada itacarambi Manga, no extremo N de itacarambi	Arcmap	RR	NAM	-14.9956	-44.0236	14	59	44	s	44	1	25	8	PAB	PAB	Localidade-tipo		Estado de Conservaç╞o: Vulnerável.		Caatinga	18918.7	S. Francisco	S├O FRANCISCO	EN	B1a, b i;iii	6	SFR08	82.4887	0	Rio São Francisco e afluentes, em Itacarambi
156	730	Rivulidae	250	Simpsonichthys magnificus (Costa & Brasil, 1991)	Manga, Estado de Minas Gerais, Brasil.	Bacia do S╞o Francisco.	Afluente do SF a W de Manga	Arcmap	RR	NAM	-14.7583	-43.9664	14	45	30	s	43	57	59	8	PAB	PAB	Localidade-tipo	Costa (1995b).	Estado de Conservaç╞o: Vulnerável.		Caatinga	68214.6	S. Francisco	S├O FRANCISCO	EN	B1a, b i;iii	6	SFR10	8.15699	6	Bacia do São Francisco, em Manga
170	750	Rivulidae	250	Simpsonichthys zonatus (Costa & Brasil, 1990)	Garapuava, Estado de Minas Gerais, Brasil.	Rio Urucuia, bacia do S╞o Francisco.	Garapuava, aprox 35 km a leste de uruana de Minas, nas cabeceiras do S╞o miguel, Alto urucuia	?	RR	NAM	-16.0653	-46.5042	16	3	55	s	46	30	15	5	NAM	OTO	Localidade-tipo	Costa (1995b).	Estado de Conservaç╞o: Em perigo.		CERRADO	40443.6	S. Francisco	S├O FRANCISCO	EN	B1a, b i;iii	6	SFR16	0	63	Rio São Miguel, Bacia do Urucuia
187	698	Rivulidae	250	Rivulus paracatuensis Costa, 2003	Córrego na várzea do Paracatu, perto de Brasil╞ndia, bacia do S╞o Francisco, Estado de Minas Gerais, Brasil.	Drenagem do Paracatu, bacia do S╞o Francisco,	Rio Paracatu em Brasilandia	Arcmap	RR	NAM	-17.0194	-46.0333	17	1	10	s	46	2	0	5	NAM	OTO	Localidade-tipo				CERRADO	647881	S. Francisco	S├O FRANCISCO	VU	B1a, b i;iii	4	SFR28	0	54	Rio Paracatu, em Brasilandia de Minas
188	709	Rivulidae	250	Simpsonichthys alternatus (Costa & Brasil, 1994)	Jo╞o Pinheiro, Estado de Minas Gerais, Brasil.	Rio Paracaté, bacia do S╞o Francisco.	Brasilandia MG, Jo╞o Pinheiro	Costa 2003	RR	NAM	-17.0333	-46.0333	17	2	0	s	46	2	0	5	NAM	OTO	Localidade-tipo		Estado de Conservaç╞o: Vulnerável.		CERRADO	647881	S. Francisco	S├O FRANCISCO	VU	B1a, b i;iii	4	SFR28	0	54	Rio Paracatu, em Brasilandia de Minas
189	748	Rivulidae	250	Simpsonichthys trilineatus (Costa & Brasil, 1994)	Jo╞o Pinheiro, Estado de Minas Gerais, Brasil.	Rio Paracatu, bacia do S╞o Francisco.	Brasilandia MG, Jo╞o Pinheiro	Costa 2003	RR	NAM	-17.0333	-46.0333	17	2	0	s	46	2	0	5	NAM	OTO	Localidade-tipo		Estado de Conservaç╞o: Vulnerável.		CERRADO	647881	S. Francisco	S├O FRANCISCO	VU	B1a, b i;iii	4	SFR28	0	54	Rio Paracatu, em Brasilandia de Minas
192	717	Rivulidae	250	Simpsonichthys delucai Costa, 2003	Poça temporária perto da cidade de Urucuia, várzea do rio Urucuia, bacia do S╞o Francisco, Estado de Minas Gerais, Brasil.	Drenagem do Urucuia, bacia do médio S╞o Francisco, Brasil.		Costa 2003	RR	NAM	-16.1333	-45.75	16	8	0	s	45	45	0	5	NAM	OTO	Localidade-tipo				CERRADO	57469.1	S. Francisco	S├O FRANCISCO	EN	B1a, b i;iii	6	SFR30	0	45	Rio Urucuia
191	745	Rivulidae	250	Simpsonichthys similis Costa & Hellner, 1999	Urucuia, Estado de Minas Gerais, Brasil.	Rio Urucuia, bacia do S╞o Francisco.	prox a Urucuia, MG, no trecho do Rio urucuia	??	RR	NAM	-16.1212	-45.7494	16	7	16	s	45	44	58	5	NAM	OTO	Localidade-tipo		Estado de Conservaç╞o: Vulnerável.		CERRADO	57469.1	S. Francisco	S├O FRANCISCO	EN	B1a, b i;iii	6	SFR30	0	45	Rio Urucuia
193	718	Rivulidae	250	Simpsonichthys fasciatus Costa & Brasil, 2006	Poça temporária aprox. 2 km da margem direita do rio Preto, drenagem do Paracatu, bacia do S╞o Francisco, aprox. 16°41'30"S 46°30'OO"W, altitude aprox. 550 m, Municipio de Unai, Estado de Mi	Espécie conhecida apenas da localidade-tipo.		Buckup et al 2007	RRT	NAM	-16.6917	-46.5	16	41	30	s	46	30	0	5	NAM	OTO	Localidade-tipo				CERRADO	38418.8	S. Francisco	S├O FRANCISCO	EN	B1a, b i;iii	6	SFR31	0	45	Corrego das Lajes e Medio Rio Preto, Alto São Francisco
194	724	Rivulidae	250	Simpsonichthys gibberatus Costa & Brasil, 2006	Poça temporária aprox. 2 km da margem direita do rio Preto, drenagem do Paracatu, bacia do S╞o Francisco, aprox. 16°41'30"S 46°30'OO"W, aititude aprox. 550 m, Municipio de Unai, Estado de Mi	Espécie conhecida apenas da localidade-tipo.		Buckup et al 2007	RRT	NAM	-16.6917	-46.5	16	41	30	s	46	30	0	5	NAM	OTO	Localidade-tipo				CERRADO	38418.8	S. Francisco	S├O FRANCISCO	EN	B1a, b i;iii	6	SFR31	0	45	Corrego das Lajes e Medio Rio Preto, Alto São Francisco
198	742	Rivulidae	250	Simpsonichthys rufus Costa, Nielsen & de Luca, 2001	Poça temporária perto do riacho do Barro, Ibiai, perto do rio S╞o Francisco, Estado de Minas Gerais, Brasil.	Bacia do médio S╞o Francisco.	Riacho do Barro x S╞o Francisco, Ibiai, MG	Arcmap	RR	NAM	-16.9783	-44.8172	16	58	42	s	44	49	2	5	NAM	OTO	Localidade-tipo		Estado de Conservaç╞o: Vulnerável.		CERRADO	91746.7	S. Francisco	S├O FRANCISCO	EN	B1a, b i;iii	5	SFR35	0	43	Riacho do Barro
200	749	Rivulidae	250	Simpsonichthys virgulatus Costa & Brasil, 2006	Lagoa temporária aproximadamente 7 km do ribeir╞o Entre Rios, drenagem do Paracatu, bacia do S╞o Francisco, aprox. 16°49'30"S 46°30'00"W, altitude ca. 530 m, Municipio de Unai, Estado de Min	Espécie conhecida apenas da localidade-tipo.		Buckup et al 2007	RRT	NAM	-16.825	-46.5	16	49	30	s	46	30	0	5	NAM	OTO	Localidade-tipo				CERRADO	17237.6	S. Francisco	S├O FRANCISCO	EN	B1a, b i;iii	6	SFR37	0	0	Afluentes do Rio Preto na altura do Ribeirão Entre Rios
536	655	Rivulidae	250	Maratecoara formosa Costa & Brasil, 1995	Brejinho de Nazaré, aproximadamente 10°59'S 48°38'W, Estado do Tocantins, Brasil.	Lagoas temporárias da várzea do médio Tocantins.	Lagoa temporária em Brejinho de Nazaré	Costa 2007	RRT	NAM, PAB	-10.9833	-48.6333	10	59	0	s	48	38	0	4	NAM	PAB	Localidade-tipo	Costa (1995b).	Estado de Conservaç╞o: Vulnerável.		CERRADO	16306.4	Tocantins - Araguaia	TOCANTINS-ARAGUAIA	VU	D2	5	TOAR47	0	100	Rio Crixás bacia do Tocantins
537	733	Rivulidae	250	Simpsonichthys multiradiatus (Costa & Brasil, 1994)	Brejinho de Nazaré, Estado do Tocantins, Brasil.	Bacia do Tocantins.	Lagoa temporária em Brejinho de Nazaré	Costa 2007	RR	NAM	-10.9833	-48.6333	10	59	0	s	48	38	0	4	NAM	OTO	Localidade-tipo		Estado de Conservaç╞o: Em perigo.		CERRADO	16306.4	Tocantins - Araguaia	TOCANTINS-ARAGUAIA	VU	D2	5	TOAR47	0	100	Rio Crixás bacia do Tocantins
540	671	Rivulidae	250	Pituna compacta (Myers, 1927)	Porto Nacional, Estado do Tocantins, Brasil.	Bacias do Araguaia e do Tocantins.	Rio Dona Francisquinha, Porto Nacional	Costa et al 2007	RR	NAM	-11.3333	-48.3333	11	20	0	s	48	20	0	4	NAM	OTO	Localidade-tipo	Costa (1998b).			CERRADO	18834.4	Tocantins - Araguaia	TOCANTINS-ARAGUAIA	VU	D2	6	TOAR49	0	100	Corrego São Felipe, baixo rio Formiga
541	682	Rivulidae	250	Plesiolebias xavantei (Costa, Lacerda & Tanizaki, 1988)	Porto Nacional, Estado do Tocantins, Brasil.	Bacia do Tocantins.	Lagoa temporaria prox Rio Dona Francisquinha, Porto Nacional	Costa et al 2007	RR	NAM	-11.3333	-48.3333	11	20	0	s	48	20	0	4	NAM	OTO	Localidade-tipo	Costa (1998a).	Estado de Conservaç╞o: Em perigo.		CERRADO	18834.4	Tocantins - Araguaia	TOCANTINS-ARAGUAIA	VU	D2	6	TOAR49	0	100	Corrego São Felipe, baixo rio Formiga
542	755	Rivulidae	250	Trigonectes strigabundus Myers, 1925	Porto Nacional, Estado do Tocantins, Brasil.	Bacia do Tocantins.	Rio Dona Francisquinha, Porto Nacional	Costa et al 2007	RR	NAM	-11.3333	-48.3333	11	20	0	s	48	20	0	4	NAM	OTO	Localidade-tipo	Costa (1990a).			CERRADO	18834.4	Tocantins - Araguaia	TOCANTINS-ARAGUAIA	VU	D2	6	TOAR49	0	100	Corrego São Felipe, baixo rio Formiga
545	678	Rivulidae	250	Plesiolebias filamentosus Costa & Brasil «in» Costa, 2007	Poça temporária em várzea aproximadamente 1,5 km da margem esquerda do rio Tocantins, 5°16?58"S 47°53?30"W, altitude 102 m, Sampaio, Estado do Tocantins, Brasil.	Poças temporárias na planície do Tocantins, between Itaguatins and Sampaio.	Localidade-tipo	Costa et al 2007	RR	PAB	-5.2828	-47.8917	5	16	58	s	47	53	30	4	NAM	PAB	Localidade-tipo				CERRADO	166537	Tocantins - Araguaia	TOCANTINS-ARAGUAIA	EN	B1a, b i;iii	6	TOAR51	7.06167	38	Rio Tocantins, a jusante de Sampaio
548	706	Rivulidae	250	Rivulus violaceus Costa, 1991	Rio das Mortes, Estado do Mato Grosso, Brasil.	Bacia do alto rio das Mortes.	Rib Dom Bosco, afluento do Rio das mortes, prox Nova Xavantina	Arcmap	RR	NAM	-14.9286	-52.6153	14	55	43	s	52	36	55	3	OTO	OTO	Localidade-tipo	Costa (1995b).			CERRADO	39068.8	Tocantins - Araguaia	TOCANTINS-ARAGUAIA	EN	B1a, b i;iii	5	TOAR54	35.3095	56	Ribeirão Dom Bosco
549	714	Rivulidae	250	Simpsonichthys brunoi Costa, 2003	Poça temporária perto da cidade de Vila Boa, várzea do ribeir╞o Canabrava, Estado de Goiás, Brasil.	Bacia do alto Tocantins, Brasil.	Ribeir╞o Canabrava, Vila Boa, Go	Costa 2003	RR	NAM	-15.0501	-47.0676	15	3	0	s	47	4	3	5	NAM	OTO	Localidade-tipo				CERRADO	112390	Tocantins - Araguaia	TOCANTINS-ARAGUAIA	EN	B1a, b i;iii	5	TOAR55	0	62	Ribeirão Canabrava, Vila Boa
727	634	Rivulidae	250	Cynolebias griseus Costa, Lacerda & Brasil, 1990	Nova Roma. Estado de Goiás. Brasil.	Rio Paran╞. bacia do Tocantins.		Costa 2001	RR	NAM	-13.75	-47.75	13	45	0	s	47	45	0	5	NAM	OTO	Localidade-tipo	Costa (2001).	Estado de Conservaç╞o: Em perigo.		CERRADO	21568.5	Tocantins - Araguaia	TOCANTINS-ARAGUAIA	VU	D2	5	TOAR64	100	100	Corrego Areia, bacia do Claro, Afluente do Paranan
262	847	Sarcoglanidinae	134	Microcambeva zsp. 1		C6rrego Urucum (afluente do rio S╞o José), Estado do Espírito Santo.			RR	NAM	-19.2333	-40.8333	19	14	0	s	40	50	0	0		PAB: 19 14 00 s 40 50 w (MZUSP 53223)	Lote de referência (MZUSP 53223).				Atlantic forest	30600.2	Northeastern Mata Atlantica	ATLANTICO SUDESTE	EN	B1a, b i;iii	5	ASE07	20.2532	35	Afluente do Rio Pancas
33	68	Serrasalminae	111	Acnodon senai Jégu & Santos, 1990	Praia na ponta da ilha de Carapatinho, rio Jari, Estado do Amapá, Brasil.	Bacia do Jari.	rio Jari, AP	Species link - MZUSP	RR	NAM	-0.5958	-52.6388	0	0	0		0	0	0	4	NAM	OTO	Localidade-tipo				Amazonia	21256.2	Amazonas Guiana Shield	AMAZONICA	EN	B1a, b i;iii	6	AMA102	1.21083	62	Medio Rio Jari
607	283	Stegophilinae	133	Homodiaetus passarellii (Miranda Ribeiro, 1944)	Córrego do Barro Branco, Bala de Guanabara, Estado do Rio de Janeiro, Brasil.	Riachos costeiros desaguando na Baia da Guanabara, Estado do Rio de Janeiro	Rio Macacu, RJ	Species link - MZUSP	RR	NAM	-22.4666	-42.6666	0	0	0		0	0	0	8	PAB	PAB	Localidade-tipo	Koch (2002).	Estado de Conservaç╞o: Em perigo.	Categoria de ameaça em listas regionais: Vulneráve	Atlantic forest	44412.8	Fluminense	ATLANTICO SUDESTE	EN	B1a, b i;iii	6	ASE42	35.0532	51	Rio Macacu
409	221	Trichogeninae	133	Trichogenes longipinnis Britski & Ortega, 1983	Cachoeira do Amor, km 3 da estrada Parati-Ubatuba, Estado de S╞o Paulo, Brasil.	Litorais norte do Estado de S╞o Paulo e sul do Rio de Janeiro.	3 km a SW da divisa SP RJ	Arcmap	RR	NAM	-23.3247	-44.7928	23	19	29	s	44	47	34	9	OTO	OTO	Localidade-tipo		Estado de Conservaç╞o: Vulnerável.	Categoria de ameaça em listas regionais: Vulneráve	Atlantic forest	86238.6	Ribeira de Iguape	ATLANTICO SUDESTE	VU	D2	6	ASE27	81.8827	97	Drenagens costerias entre Ubatuba e Parati
247	271	Trichomycterinae	133	Trichomycterus pradensis Sarmento-Soares «et al»., 2005	Rio Jucuruçu, 16°50'10"S 40°08'40"W, a 2 km da cidade de Jucuruçu, Município de Jucuruçu, Estado da Bahia, Brasil.	Bacias do Jucuruçu, do Ilanhém e do Perulbe.		Buckup et al 2007	RR	NAM	-16.8361	-40.1444	16	50	10	s	40	8	40	8	PAB	PAB	Localidade-tipo				Atlantic forest	75981.2	Northeastern Mata Atlantica	ATLANTICO LESTE	EN	B1a, b i;iii	5	ALE24	0	56	Rio Jucurucu
412	232	Trichomycterinae	133	Ituglanis proops (Miranda Ribeiro, 1908)	Rio Ribeira, Iguape, foz do rio rio Ribeira de Iguape, 24°50'S 47 10'W, Estado de S╞o Paulo, Brasil.	Espécie conhecida apenas da localidade-tipo.	Coordenada retirada da foz, no Arcmap	Arcmap	RRT	NAM	-24.6314	-47.3889	24	37	53	s	47	23	20	2	OTO	OTO	Localidade-tipo				Atlantic forest	119891	Ribeira de Iguape	ATLANTICO SUDESTE	VU	D2	5	ASE28	38.5785	85	Rio Una da LAdeia e Foz do Ribeira de Iguape
414	249	Trichomycterinae	133	Trichomycterus iheringi (Eigenmann, 1917)	Santos, Estado de S╞o Paulo, Brasil.	Espécie conhecida apenas da localidade-tipo.	Santos	CIVI IBGE	RRT	NAM	-23.9608	-46.3336	23	57	39	s	46	20	1	9	OTO	OTO	Localidade-tipo				Atlantic forest	19056.2	Ribeira de Iguape	ATLANTICO SUDESTE	EN	B1a, b i;iii	5	ASE29	3.12623	33	Bacias costeiras em Santos
416	254	Trichomycterinae	133	Trichomycterus jacupiranga Wosiacki & Oyakawa, 2005	Rio do Queimado, Parque Estadual de Jacupiranga, Cajati, Estado de S╞o Paulo, Brasil.	Espécie conhecida apenas da localidade-tipo.	Cajati	CIVI IBGE	RRT	NAM	-24.7361	-48.1228	24	44	10	s	48	7	22	2	OTO	OTO	Localidade-tipo				Atlantic forest	40353.1	Ribeira de Iguape	ATLANTICO SUDESTE	VU	D2	5	ASE30	43.4573	76	Rio do Queimado em Cajati
613	246	Trichomycterinae	133	Trichomycterus goeldii Boulenger, 1896	Riacho na Colonia Alpina, Municipio do Rio Janeiro, altitude de aproximadamente 2600 pés, Estado do Rio de Janeiro, Brasil.	Espécie conhecida apenas da localidade-tipo.	Rio de Janeiro	Arcmap	RRT	NAM	-22.4475	-42.9517	22	26	51	s	42	57	6	8	PAB	PAB: Corrigir para 22 26 51 s 42 57 06 w (Colonia Alpina, Teresópolis. Obs: A localidade publicada no Catálogo está errada!). A sp. é RRT.	Localidade-tipo			Categoria de ameaça em listas regionais: Vulneráve	Atlantic forest	26365.8	Fluminense	ATLANTICO SUDESTE	EN	B1a, b i;iii	6	ASE44	19.4233	58	Drenagens Serranas em Teresópolis
614	267	Trichomycterinae	133	Trichomycterus paquequerense (Miranda Ribeiro, 1943)	Rio Paquequer Grande, 22°30'S 43°OO'W, Estado do Rio de Janeiro, Brasil.	Espécie conhecida apenas da localidade-tipo.		Buckup et al 2007	RRT	NAM	-22.4481	-42.9831	22	26	53	s	42	58	59	8	PAB	PAB: Corrigir para 22 26 53 s 42 58 59 w (rio Paquequer a jusante do PARNA Serra dos αrg╞os. Obs: As coordenadas de Buckup, 2007, est╞o erradas, pois caem noutra bacia).	Localidade-tipo			Categoria de ameaça em listas regionais: Vulneráve	Atlantic forest	26365.8	Fluminense	ATLANTICO SUDESTE	EN	B1a, b i;iii	6	ASE44	19.4233	58	Drenagens Serranas em Teresópolis
456	247	Trichomycterinae	133	Trichomycterus guaraquessaba Wosiacki, 2005	Rio Bracinho, Fazenda Salto Dourado, Município de Guaraqueçaba, Brasil.	Espécie conhecida apenas da localidade-tipo.	Guaraquessaba	Arcmap	RRT	NAM	-25.2935	-48.2803	25	17	37	s	48	16	49	2	OTO	OTO	Localidade-tipo				Atlantic forest	38987.8	Southeastern Mata Atlantica	ATLANTICO SUL	VU	D2	6	ASU04	96.9321	99	Bacias costeiras em Guaraqueçaba
316	278	Trichomycterinae	133	Trichomycterus triguttatus (Eigenmann, 1918)	Jacarei, 22°30'S 45°50'W, Estado de S╞o Paulo, Brasil.	Espécie conhecida apenas da localidade-tipo.		Buckup et al 2007	RRT	NAM	-22.5	-45.8333	22	30	0	s	45	50	0	9	OTO	OTO	Localidade-tipo			Categoria de ameaça em listas regionais: Vulneráve	Atlantic forest	40528.1	Upper Parana	PARANA	EN	B1a, b i;iii	6	PRN37	55.7119	30	Rio Capivari
367	241	Trichomycterinae	133	Trichomycterus castroi de Pinna, 1992	Afluente do rio Iguaçu, próximo a ponte da Rodovia Curitiba-Paranaguá (BR 277), Estado do Paraná, 25°26'S 49°06W, Brasil.	Alto e médio rio iguaçu (bacia do Paraná).	Afluente rio Iguaçu, PR	Buckup et al. 2007	RR	NAM	-25.4333	-49.1	25	26	0	s	49	6	0	2	OTO	OTO	Localidade-tipo		Estado de Conservaç╞o: Vulnerável.		Atlantic forest	27673.6	Iguassu	PARANA	EN	B1a, b i;iii	6	PRN55	60.2809	39	Rio Iguaçu em Piraquara
171	242	Trichomycterinae	133	Trichomycterus concolor Costa, 1992	Córrego a 20 km ao sul da Vila de Garapuava, 16°05'S 46°35'W, bacia do rio S╞o Francisco, Estado de Minas Gerais, Brasil.	Espécie conhecida apenas da localidade-tipo.		Buckup et al 2007	RRT	NAM	-16.0833	-46.5833	16	5	0	s	46	35	0	5	NAM	OTO	Localidade-tipo				CERRADO	40443.6	S. Francisco	S├O FRANCISCO	EN	B1a, b i;iii	6	SFR16	0	63	Rio São Miguel, Bacia do Urucuia
57	207	Acestrorhynchidae	128	Acestrorhynchus isalineae Menezes & Géry, 1983	Tributário do rio dos Marmelos, bacia do rio Madeira.	Bacia do Madeira.	Afl. Rio Marmelos, bacia rio Madeira	Fuzzy Gazetteer	RRT	NAM	-6.1833	-61.7833	6	11	0	s	61	47	0	12	OTO	OTO	Localidade-tipo	Menezes & Géry (1983).			Amazonia	130328	Amazonas Lowlands	AMAZONICA	VU	D2	5	AMA11	45.7642	95	Rio dos Marmelos e Igarapé Camujá
58	208	Acestrorhynchidae	128	Acestrorhynchus maculipinna Menezes & Géry, 1983	Rio Preto da Eva, entre Manaus e Itacoatiara, Estado do Amazonas, Brasil.	Bacias do Amazonas.	Rio Preto da Eva, a montante da cidade	Arcmap	RRT	NAM	-2.6567	-59.7279	2	39	24	s	59	43	41	12	OTO	OTO	Localidade-tipo	Menezes & Géry (1983).			Amazonia	6859.42	Amazonas Lowlands	AMAZONICA	VU	D2	5	AMA12	0	89	Rio Preto da Eva
4	489	Ancistrinae	137	Dekeyseria brachyura (Kner, 1854)	Desembocadura do rio Negro, Manaus, Estado do Amazonas, Brasil.	Espécie conhecida apenas da localidade-tipo.	Manaus	Arcmap	RRT	NAM	-3.1986	-59.9842	3	11	55	s	59	59	3	12	OTO	OTO	Localidade-tipo	Van der Stigchel (1947).			Amazonia	139355	Amazonas Lowlands	AMAZONICA	EN	B1a, b i;iii	4	AMA03	37.2364	36	Boca do Solimões
5	490	Ancistrinae	137	Dekeyseria picta (Kner, 1854)	Desembocadura do rio Ne9ro, Manaus, Estado do Amazonas, Brasil.	Espécie conhecida apenas da localidade-tipo.	Manaus	ArCMAP	RRT	NAM	-3.1986	-59.9842	3	11	55	s	59	59	3	12	OTO	OTO	Localidade-tipo				Amazonia	139355	Amazonas Lowlands	AMAZONICA	EN	B1a, b i;iii	4	AMA03	37.2364	36	Boca do Solimões
52	501	Ancistrinae	137	Leporacanthicus joselimai Isbrücker & Nijssen, 1989	Maloquinha, perto de Itaituba, rio Tapajós, Estado do Pará, Brasil.	Rio Tapajós.	Entre itaituba e Cachoeira Lombo de anta, no Tapajós	ARCMAP	RR	OTO	-4.3458	-56.1281	4	20	45	s	56	7	41	12	OTO	OTO	Localidade-tipo				Amazonia	46262.1	Amazonas Lowlands	AMAZONICA	EN	B1a, b i;iii	5	AMA09	8.38312	37	Rio Tapajos, foz do Igarapé jacaré
74	487	Ancistrinae	137	Baryancistrus longipinnis (Kindle, 1895)	Rio Tocantins, Trocera, 3°21'S 61°26'W, Brasil.	Espécie conhecida apenas da localidade-tipo.		Buckup et al 2007	RRT	NAM	-3.35	-61.4333	3	21	0	s	61	26	0	12	OTO	OTO	Localidade-tipo	Isbrücker (2001).			Amazonia	156566	Amazonas Lowlands	AMAZONICA	VU	D2	5	AMA22	0	98	Igarapé Bararuá
75	496	Ancistrinae	137	Hopliancistrus tricornis Isbrücker & Nijssen, 1989	Poça de pedra, rio Tapajós, S╞o Luis, Estado do Pará, Brasil.	Rios Tapajós e Xingu.	S╞o Luis do Tapajos, PA	ARCMAP	RR	OTO	-4.4353	-56.3236	4	26	7	s	56	19	25	12	OTO	OTO	Localidade-tipo	Armbruster (1997).			Amazonia	89691	Amazonas Lowlands	AMAZONICA	VU	D2	5	AMA23	92.7365	94	Igarapé Axiri
76	508	Ancistrinae	137	Spectracanthicus murinus Nijssen & Isbrücker, 1987	Poça de pedra, rio Tapajós, S╞o Luis, Estado do Pará, Brasil.	Baixo rio Tapajós.	S╞o Luis do Tapajos, PA	ARCMAP	RR	OTO	-4.4353	-56.3236	4	26	7	s	56	19	25	12	OTO	OTO	Localidade-tipo				Amazonia	89691	Amazonas Lowlands	AMAZONICA	VU	D2	5	AMA23	92.7365	94	Igarapé Axiri
77	506	Ancistrinae	137	Peckoltia brevis (La Monte, 1935)	Rio Purus, próximo a boca do rio Macauhan, tributário do rio Yacu O qual é tributário do rio Purus.	Bacia do Purus.	Boca do Macau╞ no Purus	ARCMAP	RR	OTO	-9.0661	-68.6589	9	3	58	s	68	39	32	14	PAB	PAB	Localidade-tipo	Isbrücker (1980), Conci & Michelangeli (1974).			Amazonia	23518.6	Amazonas Lowlands	AMAZONICA	EN	B1a, b i;iii	5	AMA24	0	54	Rio Iaco
99	497	Ancistrinae	137	Hypancistrus zebra Isbrücker & Nijssen, 1991	Rio Xingu, aproximadamente uma hora de barco a motor acima de Altamira, Estado do Pará, Brasil.	Espécie conhecida apenas da localidade-tipo.	Rio Xingu, antes de altamira	Arcmap	RRT	NAM	-4.593	-52.6204	4	35	35	s	52	37	14	4	NAM	OTO	Localidade-tipo		Estado de Conservaç╞o: Vulnerável.	Categoria de ameaça em listas regionais: Vulneráve	Amazonia	306181	Xingu	AMAZONICA	VU	D2	5	AMA37	99.2847	100	Igarapé Ipixuna
100	500	Ancistrinae	137	Leporacanthicus heterodon Isbrücker & Nijssen, 1989	Cachoeira von Martius, rio Xingu, Estado do Mato Grosso, Brasil.	Rio Xingu.	Cach Von martius	Usbgn	RR	OTO	-10.0625	-52.9522	10	3	45	s	52	57	8	4	NAM	OTO	Localidade-tipo				Amazonia	23037.5	Xingu	AMAZONICA	VU	D2	5	AMA38	28.9677	99	Alto Xingu, Cachoeira Von Martius
19	491	Ancistrinae	137	Exastilithoxus hoedemani Isbrücker & Nijssen, 1985	Rio Marauiá cachoeira Pora Comeschie.	Espécie conhecida apenas da localidade-tipo.	Rio Marauiá, AM	Fuzzy Gazetteer	RRT	PAB	-0.3833	-65.2167	0	23	0	s	65	13	0	13	NAM	OTO	Localidade-tipo				Amazonia	83591.1	Rio Negro	AMAZONICA	VU	D2	6	AMA96	99.9437	100	Rio Maraui
702	499	Ancistrinae	137	Lasiancistrus saetiger Armbruster, 2005	Rio Guamá, próximo a Ourém, 1°34'07"S 47°10'08"W, Estado do Pará, Brasil.	Espécie conhecida apenas da localidade-tipo.		Buckup et al 2007	RRT	NAM	-1.5686	-47.1689	1	34	7	s	47	10	8	4	NAM	OTO	Localidade-tipo				Amazonia	48713.2	Amazonas Estuary & Coastal Drainages	ATLANTICO NORDESTE OCIDENTAL	EN	B1a, b i;iii	6	ANOC06	0	26	Rio Guamá e afluentes, médio curso
703	478	Ancistrinae	137	Ancistrus fulvus (Holly, 1929)	Alto rio Acará, baixo Amazonas, Brasil.	Espécie conhecida apenas da localidade-tipo.	rio Acará, PA	USBGN	RRT	NAM	-1.6667	-48.4167	1	40	0	s	48	25	0	4	NAM	OTO	Localidade-tipo				Amazonia	141425	Amazonas Estuary & Coastal Drainages	ATLANTICO NORDESTE OCIDENTAL	EN	B1a, b i;iii	6	ANOC07	0	31	Rio Acará, Foz
569	507	Ancistrinae	137	Peckoltia salgadae (Fowler, 1941)	Rio Salgade (rio Saigado), Icó, Estado do Ceará, Brasil.	Espécie conhecida apenas da localidade-tipo.	Rio Salgado CE	USBGN e ARCMAP	RRT	NAM	-6.4275	-38.8827	6	25	39	s	38	52	58	7	OTO	OTO	Localidade-tipo	Isbrücker (1980), Armbruster (1997).			Caatinga	104654	Northeastern Caatinga & Coastal Drainages	ATLANTICO NORDESTE ORIENTAL	EN	B1a, b i;iii	5	ANOR05	0	58	Rio Salgado, Bacia do Jaguaribe
563	502	Ancistrinae	137	Lithoxancistrus genisetiger (Fowler, 1941)	Rio Jaguaribe, Orós, Estado do Ceará, Brasil.	Bacia do Jaguaribe.	Rio Jaguaribe, Orós, Ceará	Fuzzy Gazetteer	RR	NAM	-6.2486	-38.9172	6	14	55	s	38	55	2	7	OTO	OTO	Localidade-tipo	Isbrücker (2001), Burgess (1989).			Caatinga	186278	Northeastern Caatinga & Coastal Drainages	ATLANTICO NORDESTE ORIENTAL	EN	B1a, b i;iii	6	ANOR12	0	74	Afluentes do Açude de Orós
124	476	Ancistrinae	137	Ancistrus damasceni (Steindachner, 1907)	Rio Parnaiba, próximo de Vitória e Santa Fiiomena, Brasil.	Bacia do alto Parnaiba.	Afluente do Alto Parnaíba, dentro PNNP,MA	Cent mun	RR	NAM	-9.5048	-45.8492	9	30	17	s	45	50	57	4	NAM	OTO	Localidade-tipo	Miranda Ribeiro (1911).			CERRADO	45100.1	Parnaiba	PARNAIBA	VU	D2	6	PNB07	99.787	100	Alto Rio Parnaíba
133	477	Ancistrinae	137	Ancistrus formoso Sabino & Trajano, 1997	Caverna Buraco do Ducho, 21°08'S 56°28'W, Serra da Bodoquena, Bonito, Estado do Mato Grosso do Sul, Brasil.	Espécie conhecida apenas da localidade-tipo.		Buckup et al 2007	RRT	NAM	-21.1333	-56.4667	21	8	0	s	56	28	0	3	OTO	PAB	Localidade-tipo	Trajano & Gerhard (1997).	Estado de Conservaç╞o: Vulnerável.	Estado de Conservaç╞o: Vulnerável.	CERRADO	136050	Paraguay	PARAGUAI	EN	B1a, b i;iii	6	PRG04	10.6459	62	Bacia do Rio Formoso, Bonito
143	475	Ancistrinae	137	Ancistrus cuiabae Knaack, 1999	Poça permanente do rio Bento Gomes, 36 km a sudeste de Poconé, Pantanal, Estado do Mato Grosso, Brasil.	Bacia do Cuiabá.	Rio bento gomes	USBGN	RR	NAM	-16.8394	-57.3172	16	50	22	s	57	19	2	3	OTO	OTO	Localidade-tipo				Pantanal	102276	Paraguay	PARAGUAI	VU	D2	6	PRG19	0	98	Rio Bento Gomes
177	503	Ancistrinae	137	Megalancistrus barrae (Steindachner, 1910)	Rio S╞o Francisco, Brasil.	Bacia do S╞o Francisco.	Rio SF em Barra BA??	USBGN e ARCMAP	RR	OTO	-11.0367	-43.0994	11	2	12	s	43	5	58	6	NAM	OTO	Localidade-tipo	Stawikowski (1992).			CERRADO	66865.7	S. Francisco	S├O FRANCISCO	VU	D2	5	SFR20	98.9833	85	Brejo da Cachoeira e Rio São Francisco, em Barra
516	474	Ancistrinae	137	Ancistrus cryptophthalmus Reis, 1987	Caverna Passa Três, cerca de 300 m no interior da caverna, bacia do rio S╞o Vicente, S╞o Domingos, 13°20' a 13°52'S 46°16' a 46°30'W, Estado de Goiás, Brasil.	Sistemas das cavernas S╞o Vicente e Angélica-Bezerra.	S╞o domingos GO	Buckup et al 2007	RR	NAM,PAB	-13.6	-46.3833	13	36	0	s	46	23	0	5	NAM	PAB	Localidade-tipo	Trajano & Souza (1994).			CERRADO	102122	Tocantins - Araguaia	TOCANTINS-ARAGUAIA	EN	B1a, b i;iii	5	TOAR32	38.8289	66	Rio São Vicente
534	484	Ancistrinae	137	Ancistrus reisi Fisch-Muller, Cardoso, da Silva & Bertaco, 2005	Córrego das Dores, afluente do Rio Vermelho, bacia do Rio Tocantins, Mambaí, Goiás	Riachos do Alto Tocantins	Povoado das dores, Em Mambaí Go	USBGN e ARCMAP	RR	OTO	-14.4333	-46.1333	14	26	0	s	46	8	0	5	NAM	OTO					CERRADO	10940.8	Tocantins - Araguaia	TOCANTINS-ARAGUAIA	VU	D2	6	TOAR45	100	99	Corrego das Dores, Bacia do Tocantins
445	492	Ancistrinae	137	Hemiancistrus chlorostictus Cardoso & Malabarba, 1999	Represa de Passo Fundo, Ronda Alta, bacia do Uruguai, Brasil.	Espécie conhecida apenas da localidade-tipo.	Ronda Alta RS	CIVI IBGE	RR	NAM	-27.7125	-52.7569	27	42	45	s	52	45	25	1	PAB	PAB	Localidade-tipo		Estado de Conservaç╞o: Vulnerável.		Atlantic forest	84306.4	Upper Uruguay	URUGUAI	EN	B1a, b i;iii	6	URU17	7.21839	5	Rio Passo Fundo
53	24	Anostomidae	104	Leporinus vanzoi Britski & Garavello, 2006	rio Tapajós, cachoeira Lombo de Anta, 4'26'S 56'14'W, perto de S╞o Luis, Estado do Pará, Brasil.	Bacia do Tapajós.	Rio Tapajós, perto de S╞o Luís, PA	Buckup et al. 2007	RR	NAM	-4.4333	-56.2333	4	26	0	s	56	14	0	12	OTO	OTO	Localidade-tipo				Amazonia	46262.1	Amazonas Lowlands	AMAZONICA	EN	B1a, b i;iii	5	AMA09	8.38312	37	Rio Tapajos, foz do Igarapé jacaré
110	25	Anostomidae	104	Sartor respectus Myers & Carvalho, 1959	Rio Kuluene (=Culuene), em Jacaré, na junç╞o com o rio Tamitatoala, cerca 12°S, Estado do Mato Grosso, Brasil	Alto Xingu.	bacia do Culuene	Buckup et al 2007	RR	NAM	-13.5	-53.0833	13	30	0	s	53	5	0	3	OTO	OTO	Localidade-tipo				CERRADO	34759.4	Xingu	AMAZONICA	VU	D2	5	AMA44	0	99	Alto Culuene
118	28	Anostomidae	104	Schizodon dissimilis (Garman, 1890)	Rio Puty (=Poti), Brasil.	Bacia do Parnaiba, Estado do Piaul.	Rio Poti, Bacia do Parnaíba, PI	Buckup et al. 2007	RR	NAM	-5.0833	-42.7999	0	0	0		0	0	0	7	OTO	OTO	Localidade-tipo				CERRADO	57218.8	Parnaiba	PARNAIBA	VU	D2	5	PNB06	0.0340172	100	Rio Poty, bacia do Parnaíba
119	29	Anostomidae	104	Schizodon rostratus (Borodin, 1931)	Rio Puty (=Poti), em Teresina, Estado do Piauí, Brasil.	Bacia do Parnaiba.	Rio Poti em Terezina, PI	?	RR	NAM	-5.0833	-42.7999	0	0	0		0	0	0	7	OTO	OTO	Localidade-tipo				CERRADO	57218.8	Parnaiba	PARNAIBA	VU	D2	5	PNB06	0.0340172	100	Rio Poty, bacia do Parnaíba
42	603	Apteronotidae	149	Stenarchorhynchus severii Santana & Nogueira, 2006	Rio Mucajai, abaixo da Cachoeira do Pared╞o 2, Estado de Roraima, Brasil.	Espécie conhecida apenas da localidade-tipo.	Cach Pared╞o2	?	RRT	NAM	2.95	-61.45	2	57	0	n	61	27	0	12	OTO	OTO	Localidade-tipo				Amazonia	60237.5	Amazonas Guiana Shield	AMAZONICA	VU	D2	6	AMA109	0	82	Médio Rio Mucajaí
80	606	Apteronotidae	149	Sternarchorhynchus curumim Santana & Crampton, 2006	Rio Tefé, 3°47,31'S 64°59,91'W, Toco Preto, Municipio de Tefé, Estado do Amazonas, Brasil.	Espécie conhecida apenas da localidade-tipo.		Buckup et al 2007	RR	NAM	-3.7885	-64.9983	3	47	0	s	64	60	0	13	NAM	OTO	Localidade-tipo				Amazonia	37768.5	Amazonas Lowlands	AMAZONICA	VU	D2	6	AMA26	2.38345	98	Rio Tefé
669	602	Apteronotidae	149	Apteronotus caudimaculosus Santana, 2003	Brejo de Santa Sofia, 19°26,64S 56°24,87'W, rio Novo, Aquidauana, Estado de Mato Grosso do Sul, Brasil.	Bacia do Pantanal Matogrossense.	Brejo de Santa Sofia, rio Novo, Aquidauana, MS	Buckup et al. 2007	RR	NAM	-19.45	-56.4167	19	27	0	s	56	25	0	3	OTO	OTO	Localidade-tipo				Pantanal	202234	Paraguay	PARAGUAI	VU	D2	6	PRG20	7.68753	94	Vazante Magabal e Brejo de Santa Sofia
699	216	Aspredinidae	132	Micromyzon akamai Friel & Lundberg, 1996	Rio Tocantins, acima da confluência com o rio Pará, 2"02'S 49"17'W, Brasil.	Bacia do baixo Amazonas.	Rio Tocantins, acima confluência com rio Pará, PA	Buckup et al. 2007	RR	NAM	-2.0333	-49.2833	2	2	0	s	49	17	0	4	NAM	OTO	Localidade-tipo				Amazonia	71124.4	Amazonas Estuary & Coastal Drainages	TOCANTINS-ARAGUAIA	VU	D2	5	TOAR61	0	45	Foz do Rio Tocantins
249	582	Auchenipteridae	141	Pseudauchenipterus affinis Steindachner, 1876	Rios Mucuri e S╞o Mateus, Brasil.	Rio Doce (Estado do Espírito Santo) ao rio Jucuruçu (sul do Estado da Bahia	Rio S╞o Mateus, entre S╞o MAteus e Conceiç╞o da Barra, ES	ARCMAP	RR	OTO	-18.6436	-39.7711	18	38	37	s	39	46	16	8	PAB	PAB	Localidade-tipo	Akama (1999).			Atlantic forest	155541	Northeastern Mata Atlantica	ATLANTICO LESTE	EN	B1a, b i;iii	5	ALE25	3.36974	14	Rio Sâo Mateus e drenagens costeiras adjacentes
630	576	Auchenipteridae	141	Auchenipterichthys thoracatus (Kner, 1857)	Rio Guaporé, Brasil.	Trecho superior da bacia do Madeira, na Bolivia e Brasil.	Forte Principe da Beira	USBGN	RR	OTO	-12.4167	-64.4167	12	25	0	s	64	25	0	14	PAB	PAB	Localidade-tipo	Ferraris el ai. (2005).			Amazonia	75181.6	Guapore - Itenez	AMAZONICA	EN	B1a, b i;iii	4	AMA61	6.81393	94	Rio Guaporé, em Forte Príncipe da Beira
631	586	Auchenipteridae	141	Tetranematichthys quadrifilis Kner, 1858	Rio Guaporé, Brasil.	Bacia do Guaporé.	Forte Principe da Beira	USBGN	RRT	OTO	-12.4167	-64.4167	12	25	0	s	64	25	0	14	PAB	PAB	Localidade-tipo	Vari & Ferraris Jr. (2006).			Amazonia	75181.6	Guapore - Itenez	AMAZONICA	EN	B1a, b i;iii	4	AMA61	6.81393	94	Rio Guaporé, em Forte Príncipe da Beira
743	577	Auchenipteridae	141	Entomocorus melaphareus Akama & Ferraris, Jr., 2003	Costa do Curá, margem esquerda do rio Amazonas, 2°13'46,2"8 54°01'27,6"W, Monte Alegre, Estado do Pará, Brasil.	Rio Amazonas a jusante de Manaus.		Buckup et al 2007	RR	OTO	-2.2295	-54.0243	2	13	46	s	54	1	28	4	NAM	OTO	Localidade-tipo				Amazonia	200988	Amazonas Lowlands	AMAZONICA	VU	D2	4	AMA85	30.0036	49	Rio Amazonas em Monte Alegre
147	584	Auchenipteridae	141	Pseudotatia parva Mees, 1974	Rio S╞o Francisco, em Juazeiro, Brasil.	Espécie conhecida apenas da localidade-tipo.	Juazeiro	CIVI IBGE	RRT	NAM	-9.4117	-40.4986	9	24	42	s	40	29	55	6	NAM	OTO	Localidade-tipo				Caatinga	11650.1	S. Francisco	S├O FRANCISCO	EN	B1a, b i;iii	6	SFR03	0	2	Rio São Francisco em Juazeiro
210	308	Callichthyidae	134	Aspidoras psammatides Britto, Lima & Santos, 2005	Rio Caldeir╞o, 12°39'33"S 41°22'12''W, Municipio de Lençóis, Estado da Bahia, Brasil.	Cabecerias do alto Paraguaçu.		Buckup et al 2007	RR	NAM	-12.6592	-41.37	12	39	33	s	41	22	12	6	NAM	OTO	Localidade-tipo				Caatinga	33137.4	Northeastern Mata Atlantica	ATLANTICO LESTE	VU	D2	6	ALE02	99.9711	100	Rio Lencóis
215	304	Callichthyidae	134	Aspidoras maculosus Nijssen & Isbrücker, 1976	Pequeno riacho rápido e pedregoso na Serra Jacobina entre Bom Fim e Jacobina, rio Paiaia, nas cabeceiras do Itapicuru, cerca de 11°S 40°30'W, Estado da Bahia, Brasil.	Bacias dos rios Itapicuru e Paraguaçu.		Buckup et al 2007	RR	NAM	-11	-40.5	11	0	0	s	40	30	0	6	NAM	OTO	Localidade-tipo	Nijssen & Isbrücker (1976b).			Caatinga	29410.7	Northeastern Mata Atlantica	ATLANTICO LESTE	VU	D2	4	ALE05	0.780398	78	Rio Itapicuru mirim
248	314	Callichthyidae	134	Aspidoras virgulatus Nijssen & Isbrücker, 1980	Córrego Chumbado, estrada de Linhares (19°22'S 40004'W) a S╞o Mateus (18°44'S 39°53'W), Municipio de Linhares, Estado do Espirito Santo, Brasil.	Bacias costeiras ao norte do rio Doce até ribeir╞o Trancoso no sul do Estad		Buckup et al 2007	RR	NAM	-18.7333	-39.8833	18	44	0	s	39	53	0	8	PAB	PAB	Localidade-tipo				Atlantic forest	15843.7	Northeastern Mata Atlantica	ATLANTICO LESTE	EN	B1a, b i;iii	5	ALE25	3.36974	14	Rio Sâo Mateus e drenagens costeiras adjacentes
591	318	Callichthyidae	134	Corydoras cervinus Rössel, 1962	Rio Guaporé, Estado de Rondônia, Brasil.	Bacia do Guaporé.	Rio Guaporé, RO	?	RR	NAM	-15.1186	-59.3133	15	7	7	s	59	18	48	14	PAB	PAB: Corrigir para 15 07 07 s 59 18 48 w (MZUSP 37638)	Localidade-tipo	RΣssel (1962), Nijssen & Isbrücker (1980b).			Amazonia	93846.9	Madeira Brazilian Shield	AMAZONICA	EN	B1a, b i;iii	6	AMA124	0	4	Bacia do Guaporé em Pontes e Lacerda
63	316	Callichthyidae	134	Corydoras acrensis Nijssen, 1972	Furo do lago S╞o Francisco, afluente da margem esquerda do rio Juruá, a montante da confluência com Mao [sic] (=Moá) em Cruzeiro do Sul, Estado do Acre, Brasil.	Bacia do Juruá.	Furo do lago S╞o Francisco, afl, rio Juruá, AC	Buckup et al. 2007	RR	NAM	-7.6718	-72.6647	2	37	0	s	65	44	0	13	NAM	OTO	Localidade-tipo	Nijssen (1972), Nijssen & Isbrücker (1980b).			Amazonia	42875	Amazonas Lowlands	AMAZONICA	EN	B1a, b i;iii	5	AMA16	0	57	Igarapé Treze-de-Maio
66	332	Callichthyidae	134	Lepthoplosternum stellatum Reis & Kaefer, 2005	Igarapé Repartimento, tribuitário do lago Tefé, 1,5 km a jusante da ponta da estrada Tefé-Agrovila, 3°24'28"S 64°44'10"W, Municipio de Tefé, Estado do Amazonas, Brasil.	Espécie conhecida apenas da localidade-tipo.		Buckup et al 2007	RR	NAM	-3.4078	-64.7361	3	24	28	s	64	44	10	13	NAM	OTO	Localidade-tipo				Amazonia	21387.7	Amazonas Lowlands	AMAZONICA	EN	B1a, b i;iii	5	AMA17	0.00325392	60	Baixo Rio Tefé
98	331	Callichthyidae	134	Corydoras xinguensis Nijssen, 1972	Córrego Suia-Miçu, afluente do alto rio Xingu, próximo ao posto Diauarum, 11°15'S 53°00W, Estado do Mato Grosso, Brasil.	Bacia do Xingu.		Buckup et al 2007	RR	NAM	-11.25	-53	11	15	0	s	53	0	0	4	NAM	OTO	Localidade-tipo	Nijssen (1972), Nijssen & Isbrücker (1980b).			Amazonia	50625	Xingu	AMAZONICA	EN	B1a, b i;iii	5	AMA36	31.493	84	Córrego Suiá-Missu
592	323	Callichthyidae	134	Corydoras gossei Nijssen, 1972	C6rrego próximo a Guajará-Mirim, bacia do rio Mamoré, 10050'S 65°21'W, Estado de Rondônia, Brasil.	Bacia do Mamoré.	Córrego bacia do rio Mamoré, , RO	Buckup et al . 2007	RR	NAM	-10.7864	-65.2164	10	47	11	s	65	12	59	14	PAB	PAB: Coordenada cai na Bolívia a SW de Guajará mirim, corrigir para o lado NE da cidade	Localidade-tipo	Nijssen (1972), Nijssen & Isbrücker (1980b).			Amazonia	24537.5	Madeira Brazilian Shield	AMAZONICA	EN	B1a, b i;iii	5	AMA57	0	47	Corrego Guajará Mirim
658	306	Callichthyidae	134	Aspidoras microgalaeus Britto, 1998	Pequeno afluente do rio Culuene, Km 86 da rodovia Paranatinga -Canarana, bacia do Xingu, 14°00'S 54°38'W, Estado do Mato Grosso, Brasil.	Bacia do Xingu.		Buckup et al 2007	RR	NAM	-14	-54.6333	14	0	0	s	54	38	0	3	OTO	OTO	Localidade-tipo	Britlo (1998).			CERRADO	55659.6	Tapajos - Juruena	AMAZONICA	VU	D2	6	AMA78	3.67135	100	Córrego Tabatinga
559	305	Callichthyidae	134	Aspidoras menezesi Nijssen & Isbrücker, 1976	Rio Granjeiro em Crato, afluente da margem esquerda do rio Salgado, 7°10'S 39°25'W, Estado do Ceará, Brasil.	Bacias do Jaguaribe e do Salgado.		Buckup et al 2007	RR	NAM	-7.1667	-39.4167	7	10	0	s	39	25	0	7	OTO	OTO	Localidade-tipo	Nijssen & Isbrücker (1976b).			Caatinga	186278	Northeastern Caatinga & Coastal Drainages	ATLANTICO NORDESTE ORIENTAL	EN	B1a, b i;iii	5	ANOR01	44.4851	53	Bacia dos rios Granjeiro e Salgado, Crato
565	311	Callichthyidae	134	Aspidoras spilotus Nijssen & Isbrücker, 1976	Riacho dos Macacos, afluente do rio Acaráu, Estado do Ceará, Brasil.	Bacia do Acaráu.	Rio Acaraé, CE	Arcmap	RR	NAM	-2.8831	-40.155	2	52	59	s	40	9	18	7	OTO	OTO	Localidade-tipo	Nijssen & Isbrücker (1976b).			Caatinga	5834.36	Northeastern Caatinga & Coastal Drainages	ATLANTICO NORDESTE ORIENTAL	CR	B1a, b i;iii	6	ANOR02	0	4	Riacho dos Macacos, Bacia do Acara·
558	300	Callichthyidae	134	Aspidoras carvalhoi Nijssen & Isbrücker, 1976	Açude Canabrava, Guaramiranga, Estado do Ceará, Brasil.	Bacias Iitorâneas do Nordeste.	Açude Canabrava, Guaramiranga, CE	Buckup et al. 2007	RR	NAM	-4.2094	-38.9481	4	12	34	s	38	56	53	7	OTO	OTO	Localidade-tipo	Nijssen & Isbrücker (1976b).			Caatinga	186278	Northeastern Caatinga & Coastal Drainages	ATLANTICO NORDESTE ORIENTAL	EN	B1a, b i;iii	4	ANOR11	5.73739	64	Drenagens costeiras em Fortaleza
556	310	Callichthyidae	134	Aspidoras rochai Ihering, 1907	Fortaleza, 3°45'S 38°35W, Estado do Ceará, Brasil.	Bacias litor╞neas do Nordeste ao redor de Fortaleza.		Buckup et al 2007	RR	NAM	-3.75	-38.5833	3	45	0	s	38	35	0	7	OTO	OTO	Localidade-tipo	Ihering (1907), Nijssen & Isbrücker (1976b).			Caatinga	545077	Northeastern Caatinga & Coastal Drainages	ATLANTICO NORDESTE ORIENTAL	VU	B1a, b i;iii	4	ANOR11	5.73739	64	Drenagens costeiras em Fortaleza
775	333	Callichthyidae	134	Lepthoplosternum tordilho Reis, 1997	Lagoa marginal próximo a sanga do Junco, na estrada de terra entre a rodovia BR-116 e Barra do Ribeiro, Estado do Rio Grande do Sul, Brasil.	Bacia da laguna dos Patos.	Entre BR116 e Barra do Ribeiro	Arcmap	RR	NAM	-30.2677	-51.378	30	16	4	s	51	22	41	1	PAB	PAB	Localidade-tipo	Reis (1997).	Estado de Conservaç╞o: Em perigo.	Categoria de ameaça em listas regionais: Em perigo	Pampas	83040.6	Laguna dos Patos	ATLANTICO SUL	EN	B1a, b i;iii	4	ASU29	100	87	Arroio do Ribeiro
122	309	Callichthyidae	134	Aspidoras raimundi (Steindachner, 1907)	Pequenos córregos tributários do rio Parnaíba, em Victoria (=alto Parnaiba), Estado do Maranh╞o, Brasil.	Bacia do Parnalba.	Afluente do Alto parnaíba, dentro PNNP,MA	Arcmap	RR	NAM	-9.5048	-45.8492	9	30	17	s	45	50	57	4	NAM	OTO	Localidade-tipo	Steindachner (1907a), Nijssen & Isbrücker (1976b).			CERRADO	45100.1	Parnaiba	PARNAIBA	VU	D2	6	PNB07	99.787	100	Alto Rio Parnaíba
123	330	Callichthyidae	134	Corydoras treitlii Steindachner, 1906	Pequenos córregos que deságuam no rio Parnaiba, em Victoria (=alto Parnaiba), Estado do Maranh╞o, Brasil.	Bacia do Parnaiba.	Afluente do Alto parnaíba, dentro PNNP,MA	Arcmap	RR	NAM	-9.5048	-45.8492	9	30	17	s	45	50	57	4	NAM	OTO	Localidade-tipo	Steindachner (1906), Nijssen & Isbrücker (1980b),			CERRADO	45100.1	Parnaiba	PARNAIBA	VU	D2	6	PNB07	99.787	100	Alto Rio Parnaíba
175	326	Callichthyidae	134	Corydoras multimaculatus Steindachner, 1907	Afluente do rio Preto, próximo a Santa Rita de Cássia, cerca de 11°00'S 44°30'W, Estado da Bahia, Brasil.	Bacia do S╞o Francisco.		Buckup et al 2007	RR	NAM	-11	-44.5	11	0	0	s	44	30	0	6	NAM	OTO	Localidade-tipo	Steindachner (1907b), Nijssen & Isbrücker (1980b).			CERRADO	268531	S. Francisco	S├O FRANCISCO	VU	D2	6	SFR18	25.5593	100	Foz do Rio Preto
474	299	Callichthyidae	134	Aspidoras brunneus Nijssen & Isbrücker, 1976	Serra do Roncador, Km 125 da rodovia Xavantina-Caximba, Estado do Mato Grosso, Brasil.	Bacia do Xingu.	Serra Roncador	USBGN	RR	NAM	-11	-52	11	0	0	s	52	0	0	4	NAM	OTO	Localidade-tipo	Nijssen & Isbrücker (1976b).			Amazonia	22265.1	Tocantins - Araguaia	TOCANTINS-ARAGUAIA	EN	B1a, b i;iii	5	TOAR07	0	62	Rio Tapirapé, Serra do Roncador
523	298	Callichthyidae	134	Aspidoras belenos Britto, 1998	Córrego na rodovia Primavera do Leste Paranatinga, 82 km norte de Primavera do Leste, bacia do rio das Mortes, 15°03'S 52°03'W, Estado do Mato Grosso, Brasil.	Bacia do Araguaia.		Buckup et al 2007	RR	NAM	-15.05	-52.05	15	3	0	s	52	3	0	3	OTO	OTO	Localidade-tipo	Britto (1998).			CERRADO	82268.8	Tocantins - Araguaia	TOCANTINS-ARAGUAIA	EN	B1a, b i;iii	4	TOAR37	0	21	Ribeirão Insula
527	307	Callichthyidae	134	Aspidoras pauciradiatus (Weitzman & Nijssen, 1970)	Rio Araguaia próximo a Aruan╞, 14°58'S 51°04'W, Estado de Goiás, Brasil.	Bacia do Araguaia.		Buckup et al 2007	RR	NAM	-14.9667	-51.0667	14	58	0	s	51	4	0	3	OTO	OTO	Localidade-tipo	Weitzman & Nijssen (1970), Nijssen & Isbrücker (19			CERRADO	43006.3	Tocantins - Araguaia	TOCANTINS-ARAGUAIA	EN	B1a, b i;iii	5	TOAR39	1.80513	9	Ribeirão Pinguela
530	313	Callichthyidae	134	Aspidoras velites Britto, Lima & Moreira, 2002	Municipio de Alto Araguaia, córrego Boiadeiro, Km 487,08 da ferrovia Ferronorte, 17°20'Ol"S 53°14'53"W, Estado de Mato Grosso, Brasil.	Bacia do Araguaia.		Buckup et al 2007	RR	NAM	-17.3336	-53.2481	17	20	1	s	53	14	53	3	OTO	OTO	Localidade-tipo	Britto el ai. (200;».			CERRADO	28030.1	Tocantins - Araguaia	TOCANTINS-ARAGUAIA	EN	B1a, b i;iii	5	TOAR41	42.6157	70	Corrego Boiadeiro/Córrego Gordura
657	214	Cetopsidae	131	Cetopsis sandrae Vari, Ferraris & de Pinna, 2005	Córrego na Fazenda Buriti, Nova Mutum, 13°52'52"S 56°11'36"W, Estado de Mato Grosso, Brasil.	Rio Arinos, bacia do alto Tapajós.	Córrego na Fazenda Buriti, Nova Mutum, MT	Buckup et al. 2007	RR	NAM	-13.8811	-56.1933	13	52	52	s	56	11	36	3	OTO	OTO	Localidade-tipo				CERRADO	16803.1	Tapajos - Juruena	AMAZONICA	VU	D2	6	AMA77	0	76	Corrego Agua Clara
130	54	Characinae	111	Phenacogaster jancupa Malabarba & Lucena, 1995	Ribeir╞o Espinheiro, afluente do CuiaM, alto Paraguai, Jangada, Estado do Mato Grosso, Brasil.	Espécie conhecida apenas da localidade-tipo.	Rib Espinheiro	Arcmap	RR	NAM	-15.4443	-56.4579	15	26	40	s	56	27	28	3	OTO	OTO	Localidade-tipo				CERRADO	53196.6	Paraguay	PARAGUAI	VU	D2	6	PRG02	0	84	Ribeirão Espinheiro
207	58	Cheirodontinae	111	Kolpotocheirodon figueiredoi Malabarba, Lima & Weitzman, 2004	Rio Pratinha, Fazenda Pratinha, Iraquara, Estado da Bahia, Brasil.	Rio Pratinha, bacia do rio Paraguaçu, Estado da Bahia, Brasil.	Iraquara	Arcmap	RR	NAM	-12.2405	-41.6106	12	14	26	s	41	36	38	6	NAM	OTO	Localidade-tipo				Caatinga	78243.4	Northeastern Mata Atlantica	ATLANTICO LESTE	EN	B1a, b i;iii	5	ALE01	38.1928	18	Rio Pratinha e Bacia do Agua de Rega
221	831	Cichlidae	387	Geophagus itapicuruensis Haseman, 1911	Queimadas, rio Itapicuru, Estado da Bahia, Brasil.	Espécie conhecida apenas da localidade-tipo.	Rio Itapicuru em Queimadas BA	Arcmap	RRT	NAM	-10.9736	-39.6456	10	58	25	s	39	38	44	6	NAM	OTO	Localidade-tipo				Caatinga	192584	Northeastern Mata Atlantica	ATLANTICO LESTE	VU	D2	4	ALE08	0.0589887	95	Bacia do Itapicuru
222	833	Cichlidae	387	Geophagus obscurus (Castelnau, 1855)	Rio Paraguaçu, Estado da Bahia, Brasil.	Bacia do Paraguaçu.	Rio Paraguaçu, Bahia	Buckup et al. 2007	RR	NAM	-11.5589	-40.9056	11	33	32	s	40	54	20	6	NAM	OTO	Localidade-tipo				Caatinga	45584.4	Northeastern Mata Atlantica	ATLANTICO LESTE	VU	D2	6	ALE09	0.794209	100	Bacia do Jaucuipe em Morro do Chapeu
6	838	Cichlidae	387	Nannacara taenia Regan, 1912	Amazonas em Manaus, Estado do Amazonas, Brasil.	Amazônia central.	Manaus	Arcmap	RR	OTO	-3.1986	-59.9842	3	11	55	s	59	59	3	12	OTO	OTO	Localidade-tipo				Amazonia	139355	Amazonas Lowlands	AMAZONICA	EN	B1a, b i;iii	4	AMA03	37.2364	36	Boca do Solimões
55	829	Cichlidae	387	Crenicichla urosema Kullander, 1990	Poço rochoso em S╞o Luiz, a montante de Itaituba, rio Tapajós, Estado do Pará, Brasil.	Bacia do Tapajós, na regi╞o de S╞o Luiz.	Rio Tapajos, proximo de Itaituba, a montante da cidade	ARCMAP	RR	OTO	-4.33	-56.0806	4	19	48	s	56	4	50	12	OTO	OTO	Localidade-tipo				Amazonia	73512.6	Amazonas Lowlands	AMAZONICA	EN	B1a, b i;iii	5	AMA10	1.36259	24	Rio Tapajos, Foz do Igarapé Capituã
31	837	Cichlidae	387	Nannacara adoketa Kullander & Prada-Pedreros, 1993	Igarapé do Cumaru, tributário do paraná Atauai, médio rio Negro, Estado do Amazonas, Brasil.	Regi╞o do médio rio Negro.	Igarapé Cumaru	USBGN	RR	OTO	0.4	-64	0	24	0	n	64	0	0	13	NAM	OTO	Localidade-tipo				Amazonia	192713	Rio Negro	AMAZONICA	VU	D2	6	AMA100	0	99	Bacia do Rio Padauari
64	798	Cichlidae	387	Apistogramma juruensis Kullander, 1986	Cruzeiro do Sul, rio Juruá, Estado do Acre, Brasil.	Rio Moá e rio Juruá.	Baixo rio Juruá, no mun de Cruzeiro do Sul	ARCMAP	RR	OTO	-7.6718	-72.6647	7	40	19	s	72	39	53	14	PAB	PAB	Localidade-tipo				Amazonia	42875	Amazonas Lowlands	AMAZONICA	EN	B1a, b i;iii	5	AMA16	0	57	Igarapé Treze-de-Maio
65	800	Cichlidae	387	Apistogramma moae Kullander, 1980	Igarapé S╞o Salvador, 7°38'S 72°36'W, do rio Moá, Cruzeiro do Sul, Estado do Acre, Brasil.	Rio Moá e rio Juruá.	Baixo rio Juruá, no mun de Cruzeiro do Sul	ARCMAP	RR	OTO	-7.6718	-72.6647	7	40	19	s	72	39	53	14	PAB	PAB	Localidade-tipo				Amazonia	42875	Amazonas Lowlands	AMAZONICA	EN	B1a, b i;iii	5	AMA16	0	57	Igarapé Treze-de-Maio
84	792	Cichlidae	387	Apistogramma arua Römer & Warzel, 1998	Pequeno afiuente do rio Arua, tributário do rio Arapiuns, aproximadamente 2°39'27"S 55°53'24"W, cerca de 2,5 km a montante da vila de Arua, Estado do Pará, Brasil.	Bacia do Arapiuns, Brasil.		Buckup et al 2007	RR	NAM	-2.6575	-55.89	2	39	27	s	55	53	24	12	OTO	OTO	Localidade-tipo				Amazonia	26134.4	Amazonas Lowlands	AMAZONICA	VU	D2	6	AMA29	0	97	Rio Aruã
85	804	Cichlidae	387	Apistogramma resticulosa Kullander, 1980	Igarapé Xicanga, cerca de 5 km a oeste de Humaitá, 7°31'S 63°04'W, bacia do Madeira, Estado do Amazonas, Brasil.	Bacia do Madeira próximo a Humaitá,		Buckup et al 2007	RRT?	OTO	-7.5167	-63.0667	7	31	0	s	63	4	0	14	PAB	PAB	Localidade-tipo				Amazonia	108291	Amazonas Lowlands	AMAZONICA	VU	D2	6	AMA30	0	92	Igarapé Puruzinho
86	844	Cichlidae	387	Teleocichla prionogenys Kullander, 1988	Rio Tapajós, S╞o Luis, acima de Itaituba, Estado do Pará, Brasil.	Espécie conhecida apenas da localidade-tipo.	S╞o Luis do Tapajos, PA	ARCMAP	RRT	NAM	-4.4353	-56.0736	4	26	7	s	56	4	25	12	OTO	OTO	Localidade-tipo				Amazonia	284385	Amazonas Lowlands	AMAZONICA	VU	D2	4	AMA31	32.7583	83	Rio Itapacurá
87	845	Cichlidae	387	Teleocichla proselytus Kullander, 1988	Rio Tapajós, S╞o Luis, acima de Ilaituba, Estado do Pará, Brasil.	Rio Tapajós.	S╞o Luis do Tapajos, PA	ARCMAP	RR	OTO	-4.4353	-56.0736	4	26	7	s	56	4	25	12	OTO	OTO	Localidade-tipo				Amazonia	284385	Amazonas Lowlands	AMAZONICA	VU	D2	4	AMA31	32.7583	83	Rio Itapacurá
101	840	Cichlidae	387	Teleocichla centrarchus Kullander, 1988	Cachoeira von Martius, alto rio Xingu, Estado do Mato Grosso, Brasil.	Espécie conhecida apenas da localidade-tipo.	Cach Von martius	ARCMAP	RRT	NAM	-10.0625	-52.9522	10	3	45	s	52	57	8	4	NAM	OTO	Localidade-tipo				Amazonia	23037.5	Xingu	AMAZONICA	VU	D2	5	AMA38	28.9677	99	Alto Xingu, Cachoeira Von Martius
102	842	Cichlidae	387	Teleocichla gephyrogramma Kullander, 1988	Cachoeira von Martius, alto rio Xingu, Estado do Mato Grosso, Brasil.	Espécie conhecida apenas da localidade-tipo.	Cach Von martius	ARCMAP	RRT	NAM	-10.0625	-52.9522	10	3	45	s	52	57	8	4	NAM	OTO	Localidade-tipo				Amazonia	23037.5	Xingu	AMAZONICA	VU	D2	5	AMA38	28.9677	99	Alto Xingu, Cachoeira Von Martius
103	843	Cichlidae	387	Teleocichla monogramma Kullander, 1988	Cachoeira von Martius, aito rio Xingu, Estado do Mato Grosso, Brasil.	Espécie conhecida apenas da localidade-tipo.	Cach Von martius	ARCMAP	RRT	NAM	-10.0625	-52.9522	10	3	45	s	52	57	8	4	NAM	OTO	Localidade-tipo				Amazonia	23037.5	Xingu	AMAZONICA	VU	D2	5	AMA38	28.9677	99	Alto Xingu, Cachoeira Von Martius
109	824	Cichlidae	387	Crenicichla phaiospilus Kullander, 1991	Rio Fresco, Aldeia Gorotire, Municipio de S╞o Félix do Xingu, Estado do Pará, Brasil.	Bacia do Xingu.	Rio Fresco, Sao Felix do Xingu	ARCMAP	RR	OTO	-6.6981	-51.7889	6	41	53	s	51	47	20	4	NAM	OTO	Localidade-tipo				Amazonia	25806.2	Xingu	AMAZONICA	EN	B1a, b i;iii	5	AMA43	0	20	Rio Fresco
437	789	Cichlidae	387	Aequidens michaeli Kullander, 1995	Poço rochoso próximo a Cachoeira, Belo Monte, bacia do Xingu, Estado do Pará, Brasil.	Bacia do baixo Xingu.	Belo Monte, PA	USBGN	RR	OTO	-3.0833	-51.7667	3	5	0	s	51	46	0	4	NAM	OTO	Localidade-tipo				Amazonia	13537.6	Amazonas Estuary & Coastal Drainages	AMAZONICA	EN	B1a, b i;iii	6	AMA47	0	30	Rio Xingu, Belo Monte
10	797	Cichlidae	387	Apistogramma gossei Kullander, 1982	Martinica, bacia do rio Oiapoque, [Estado] do Amapá, Brasil.	Bacia do Oiapoque, na fronteira entre Brasil e Guiana Francesa, e do Approu	Rio Oiapoque, entr BR e GFR, na altura do médio approague	ARCMAP	RR	OTO	3.6333	-51.9814	3	38	5	n	51	58	53	4	NAM	OTO	Localidade-tipo				Amazonia	213384	Guianas	AMAZONICA	EN	B1a, b i;iii	4	AMA88	94.9422	91	Medio Oiapoque
26	793	Cichlidae	387	Apistogramma brevis Kullander, 1980	Pequeno canal do lago Penera, 0°01 'N 67°21'W, Estado do Amazonas, Brasil.	Bacia do Uaupés, na Amazônia.		Buckup et al 2007	RR	OTO	0.0167	-67.35	0	1	0	n	67	21	0	13	NAM	OTO	Localidade-tipo				Amazonia	35193.8	Rio Negro	AMAZONICA	VU	D2	5	AMA98	35.328	84	Rio Negro, Lago Penera
27	795	Cichlidae	387	Apistogramma elizabethae Kullander, 1980	Tributário do rio Uaupés em Trov╞o, a cerca de 20 km da desembocadura do Uaupés, 0002'S 67"25'W, Estado do Amazonas, Brasil.	Bacia do Uaupés, na Amazônia.	Corrigido a long para 67 26, conforme outros dois dados para amesma localidade descrita	Buckup et al 2007 corrigido	RR	OTO	-0.0333	-67.4333	0	2	0	s	67	26	0	13	NAM	OTO	Localidade-tipo				Amazonia	19780.9	Rio Negro	AMAZONICA	VU	D2	6	AMA99	100	99	Tributário da margem direita do baixo curso do Uaupés
28	799	Cichlidae	387	Apistogramma meinkeni Kullander, 1980	Tributário do rio Uaupés em Trov╞o, a cerca de 20 km da desembocadura do Uaupés, 0002'S 67°26'W, Estado do Amazonas, Brasil.	Bacia do Uaupés, na Amazônia.		Buckup et al 2007	RR	OTO	-0.0333	-67.4167	0	2	0	s	67	25	0	13	NAM	OTO	Localidade-tipo				Amazonia	19780.9	Rio Negro	AMAZONICA	VU	D2	6	AMA99	100	99	Tributário da margem direita do baixo curso do Uaupés
29	801	Cichlidae	387	Apistogramma personata Kullander, 1980	Rio Uaupés, Assai, 0"02'N 67"27'W, Estado do Amazonas, Brasil.	Bacia do Uaupés, na Amazônia,		Buckup et al 2007	RR	OTO	-0.0333	-67.45	0	2	0	s	67	27	0	13	NAM		Localidade-tipo				Amazonia	19780.9	Rio Negro	AMAZONICA	VU	D2	6	AMA99	100	99	Tributário da margem direita do baixo curso do Uaupés
30	806	Cichlidae	387	Apistogramma uaupesi Kullander, 1980	Tributário do rio Uaupés em Trov╞o, a cerca de 20 km da desembocadura do Uaupés, 0"02'S 67"26'W, Estado do Amazonas, Brasil.	Bacia do Uaupés e Negro, na Amazônia central.		Buckup et al 2007	RR	OTO	-0.0333	-67.4333	0	2	0	s	67	26	0	13	NAM	OTO	Localidade-tipo				Amazonia	19780.9	Rio Negro	AMAZONICA	VU	D2	6	AMA99	100	99	Tributário da margem direita do baixo curso do Uaupés
708	794	Cichlidae	387	Apistogramma caetei Kullander, 1980	Igarapé em Bragança, 1045'S 46°47'W, Estado do Pará, Brasil.	Bacias dos rios Apeé e Caeté em Bragança, Estado do Pará, Brasil.	Rio Caeté, em Bragança, PA	ARCMAP	RR	OTO	-1.0775	-46.7611	1	4	39	s	46	45	40	4	NAM	OTO	Localidade-tipo				Amazonia	45959.5	Amazonas Estuary & Coastal Drainages	ATLANTICO NORDESTE OCIDENTAL	EN	B1a, b i;iii	5	ANOC11	6.1204	15	Rio Caeté, Bragança
793	835	Cichlidae	387	Gymnogeophagus lacustris Reis & Malabarba, 1988	Lagoa da Cerquinha, Pinhal, Municipio de Tramandai, Estado do Rio Grande do Sul, Brasil.	Bacias do Tramandai, no Estado do Rio Grande do Sul.	Drenagem costeira em Tramandaí, RS	ARCMAP	RR	OTO	-30.2708	-50.2708	30	16	15	s	50	16	15	1	PAB	PAB: Corrigir para 30 16 15 s 50 1615 w (Margem sudeste da lagoa Cerquinha)	Localidade-tipo				Pampas	70331.7	Laguna dos Patos	ATLANTICO SUL	EN	B1a, b i;iii	5	ASU44	0	11	Lagoa da Cerquinha e drenagens adjacentes
127	802	Cichlidae	387	Apistogramma piauiensis Kullander, 1980	Lagoa Seca, 3"08'S 41"54W, no rio Parnaiba, em Barra Longa, próximo a Buriti dos Lopes, Brasil.	Bacia do Parnalba.	Lagoa Seca, rio Parnaíba, Barra Longa,	Buckup et al. 2007	RR	NAM	-3.1333	-41.9	3	8	0	s	41	54	0	7	OTO	OTO	Localidade-tipo				CERRADO	35187.9	Parnaiba	PARNAIBA	VU	D2	5	PNB09	55.9541	77	Lagoa Seca, Rio Parnaíba
737	810	Cichlidae	387	Crenicichla compressiceps Ploeg, 1986	Cachoeira abaixo de Jatobal, Brasil.	Bacia do baixo Tocantins.	Jatobal, ilha, PA	USBGN	RR	NAM	-8.9333	-49.7667	8	56	0	s	49	46	0	4	NAM	OTO	Localidade-tipo				CERRADO	622528	Tocantins - Araguaia	TOCANTINS-ARAGUAIA	VU	D2	4	TOAR66	90.4775	83	Rio Tocantins e afluentes, na Ilha do Jatobal
739	817	Cichlidae	387	Crenicichla jegui Ploeg, 1986	Rio Tocantins, Itupiranga, Brasil.	Bacia do baixo Tocantins.	Itupiranga, PA	USBGN	RR	NAM	-5.15	-49.3333	5	9	0	s	49	20	0	4	NAM	OTO	Localidade-tipo		Estado de Conservaç╞o: Criticamente em perigo.	Categoria de ameaça em listas regionais: Criticame	Amazonia	140309	Tocantins - Araguaia	TOCANTINS-ARAGUAIA	EN	B1a, b i;iii	4	TOAR68	0	38	Rio Tocantins em Itupiranga
800	836	Cichlidae	387	Gymnogeophagus meridionalis Reis & Malabarba, 1988	Rio Negro (na rodovia BR-153), bacia do Uruguai, Bagé, Estado do Rio Grande do Sul, Brasil.	Rio Negro (em Bagé), bacia do Uruguai, na Argentina, Uru9uai e Brasil.	Rio Negro x BR 153 em Bagé	ARCMAP	RR	OTO	-31.4911	-54.1942	31	29	28	s	54	11	39	1	PAB	PAB	Localidade-tipo				Pampas	163587	Lower Uruguay	URUGUAI	EN	B1a, b i;iii	6	URU07	0	34	Rio Negro em Bagé
211	217	Copionodontinae	133	Copionodon lianae Campanario & de Pinna, 2000	Rio Grisane (bacia do Mucujê), 13°08'S 41°17'W, Estado da Bahia, Brasil.	Espécie conhecida apenas da localidade-tipo.		Buckup et al 2007	RRT	NAM	-13.1333	-41.2833	13	8	0	s	41	17	0	6	NAM	OTO	Localidade-tipo				Caatinga	18068.8	Northeastern Mata Atlantica	ATLANTICO LESTE	VU	D2	6	ALE03	48.8082	100	Rio Grisane em MucujÛ
212	218	Copionodontinae	133	Copionodon orthiocarinatus de Pinna, 1992	Rio Mucujê, tributário do rio Paraguaçu, 13°00'S 41°23'W, 1200 m acima do nivel do mar, Estado da Bahia, Brasil.	Espécie conhecida apenas da localidade-tipo.		Buckup et al 2007	RRT	NAM	-13	-41.3833	13	0	0	s	41	23	0	6	NAM	OTO	Localidade-tipo				Caatinga	12956.2	Northeastern Mata Atlantica	ATLANTICO LESTE	VU	D2	5	ALE04	86.6259	94	Rio Mucujê
213	219	Copionodontinae	133	Copionodon pecten de Pinna, 1992	Rio Mucujê, tributário do rio Paraguaçu, 13°00'S 41°23'W, 1200 m acima do nivel do mar, Estado da Bahia, Brasil.	Espécie conhecida apenas da localidade-tipo.		Buckup et al 2007	RRT	NAM	-13	-41.3833	13	0	0	s	41	23	0	6	NAM	OTO	Localidade-tipo				Caatinga	12956.2	Northeastern Mata Atlantica	ATLANTICO LESTE	VU	D2	5	ALE04	86.6259	94	Rio Mucujê
214	220	Copionodontinae	133	Glaphyropoma rodriguesi de Pinna, 1992	Rio Mucujê, tributário do rio Paraguaçu, 13°00'S 41 °23'W, 1200 m acima do nivel do mar, Estado da Bahia, Brasil.	Espécie conhecida apenas da localidade-tipo.		Buckup et al 2007	RRT	NAM	-13	-41.3833	13	0	0	s	41	23	0	6	NAM	OTO	Localidade-tipo				Caatinga	12956.2	Northeastern Mata Atlantica	ATLANTICO LESTE	VU	D2	5	ALE04	86.6259	94	Rio Mucujê
232	30	Crenuchidae	107	Characidium bahiense Almeida, 1975	Arembepe, Estado da Bahia, Brasil.	Bacias costeiras da regi╞o de Arembepe.	Arembepe	USBGN	RR	NAM	-12.75	-38.3333	12	45	0	s	38	20	0	6	NAM	OTO	Localidade-tipo				Atlantic forest	70872	Northeastern Mata Atlantica	ATLANTICO LESTE	EN	B1a, b i;iii	5	ALE16	82.9632	8	Rio Capivara, Arembepe
88	846	Crenuchidae	107	Characidium roesseli Géry, 1965	Igarapé Preto, próximo a Belém, cerca de 60 km abaixo de Leticia, Estado do Amazonas, Brasil.	Bacia do SolimΣes.			RR	PAB	-4.0464	-69.5256	4	2	47	s	69	31	32	0		PAB: 04 02 47 s 69 31 32 w ( Belém, AM)	Localidade-tipo				Amazonia	65652.7	Amazonas Lowlands	AMAZONICA	VU	D2	6	AMA32	99.7796	99	Igarapé de Belém
488	40	Crenuchidae	107	Melanocharacidium auroradiatum Costa & Vicente, 1994	Pequeno tributário do rio Verde (bacia do rio Araguaia), 1 km ao sul de S╞o Miguel do Araguaia, 13°22' S 50°15S'W, Brasil.	Bacia do Araguaia.		Buckup et al 2007	RRT	PAB	-13.3667	-50.25	13	22	0	s	50	15	0	5	NAM	PAB	Localidade-tipo				CERRADO	37878	Tocantins - Araguaia	TOCANTINS-ARAGUAIA	EN	B1a, b i;iii	4	TOAR15	0.0110951	1	Ribeirão São Domingos
485	7	Curimatidae	103	Curimata acutirostris Vari & Reis, 1995	Lagoas marginais no rio Araguaia, próximo de Luis Alves, Municipio de S╞o Miguel do Araguaia, aproximadamente 13°14'S 50 35'W, Brasil.	Alto rio Araguaia.		Buckup et al 2007	RR	NAM	-13.2333	-50.5833	13	14	0	s	50	35	0	5	NAM	PAB	Localidade-tipo	Vari & Reis (1995).			CERRADO	110094	Tocantins - Araguaia	TOCANTINS-ARAGUAIA	VU	D2	4	TOAR12	92.7909	90	Rio Araguaia em Luis Alves
486	9	Curimatidae	103	Cyphocharax signatus Vari, 1992	Lagoa marginal do rio Vermelho, na intersecç╞o com a estrada de Aruan╞ a Brit╞nia, Estado de Goiás, Brasil.	Bacia do Vermelho.		Arcmap Rio Vermelhoxestrada a	RR	NAM	-15.1664	-51.1466	15	9	59	s	51	8	48	3	OTO	OTO	Localidade-tipo				CERRADO	34321.9	Tocantins - Araguaia	TOCANTINS-ARAGUAIA	EN	B1a, b i;iii	5	TOAR13	0.344684	0	Baixo Rio Vermelho
219	575	Doradidae	140	Kalyptodoras bahiensis Higuchi, Britski & Garavelo, 1990	Rio Paraguaçu, abaixo da represa de Bananeiras, Estado da Bahia, Brasil.	Rio Paraguaçu, abaixo da represa de Bananeiras, Estado da Bahia, Brasil.	Rio Paraguaçu, Bahia	?	RR	NAM	-12.7619	-40.2131	12	45	43	s	40	12	47	6	NAM	OTO	Localidade-tipo	Higuchi (1992), Sabaj & Ferraris (2003).	Estado de Conservaç╞o: Em perigo.		Caatinga	26024.9	Northeastern Mata Atlantica	ATLANTICO LESTE	EN	B1a, b i;iii	6	ALE07	0	32	Rio Paraguaçu em Iaçu
629	572	Doradidae	140	Doras fimbriatus Kner, 1855	Rio Guaporé.	Bacia do Guaporé.	Forte Principe da Beira	USBGN	RR	OTO	-12.4167	-64.4167	12	25	0	s	64	25	0	14	PAB	PAB	Localidade-tipo	Higuchi (1992), Sabaj & Ferraris (2003).			Amazonia	75181.6	Guapore - Itenez	AMAZONICA	EN	B1a, b i;iii	4	AMA61	6.81393	94	Rio Guaporé, em Forte Príncipe da Beira
121	574	Doradidae	140	Hassar affinis (Steindachner, 1881)	Rio Poti, Brasil.	Bacia do Parnaiba.	Rio Poti, Bacia do Parnaíba	Species link MZUSP	RR	NAM	-5.0833	-42.7999	0	0	0		0	0	0	7	OTO	OTO	Localidade-tipo	Higuchi (1992). Sabaj & Ferraris (2003).			CERRADO	57218.8	Parnaiba	PARNAIBA	VU	D2	5	PNB06	0.0340172	100	Rio Poty, bacia do Parnaíba
243	209	Erythrinidae	129	Erythrinus kessleri Steindachner, 1876	Salvador, Estado da Bahia, Brasil.	Bacias costeiras do leste, Estado da Bahia.	Drenagem costeira em Salvador	ARCMAP	RR	OTO	-12.9006	-38.4333	12	54	2	s	38	26	0	6	NAM	OTO	Localidade-tipo				Atlantic forest	48463.8	Northeastern Mata Atlantica	ATLANTICO LESTE	EN	B1a, b i;iii	5	ALE21	16.915	13	Drenagens costerias de Salvador
16	290	Glanapteryginae	134	Glanapteryx niobium de Pinna, 1998	Parque Nacional do Pico da Neblina, Morro dos Seis Lagos, Lago Esperança, Estado do Amazonas.	Morro dos Seis Lagos, bacia do rio Negro.	Parque Nacional do Pico da Neblina, na bacia do Negro AM. Falta definir precisamente o lago da loc tipo.	ARCMAP	RR	NAM	0.1167	-65.8139	0	7	13	n	65	48	50	13	NAM	OTO	Localidade-tipo				Amazonia	32109.6	Rio Negro	AMAZONICA	VU	D2	6	AMA93	100	100	Morro dos Seis Lagos, Pico da Neblina
17	296	Glanapteryginae	134	Typhlobelus ternetzi Myers, 1944	Poças de pedra abaixo das corredeiras de S╞o Gabriel, rio Negro (abaixo da cidade de Uaupés, antiga S╞o Gabriel), Estado do Amazonas, Brasil.	Alto rio Negro.	Uaupés	Arcmap	RR	NAM	0.0333	-67.2719	0	2	6	n	67	16	19	13	NAM	OTO	Localidade-tipo				Amazonia	7221.95	Rio Negro	AMAZONICA	VU	D2	5	AMA98	35.328	84	Rio Negro, Lago Penera
618	294	Glanapteryginae	134	Listrura tetraradiata Landim & Costa, 2002	Rio da Represa (tributário do rio Bom Sucesso, rio Ibicuiba, bacia da Lagoa de Araruama), Palmital, aproximadamente 5 km de Bacaxá, Saquarema, Estado do Rio de Janeiro, Brasil.	Rio Ibicuiba,sistema da Lagoa de Araruama.	Córrego próximo a Bacaxá.	Species Link MZUSP 52572	RR	NAM	-22.9333	-42.5166	22	50	25	s	42	27	22	8	PAB	PAB: Corrigir para 22 50 25 s 42 27 22 w (5 km ao N de Bacaxá)	Localidade-tipo		Estado de Conservaç╞o: Vulnerável.		Atlantic forest	23103.2	Fluminense	ATLANTICO SUDESTE	EN	B1a, b i;iii	6	ASE46	1.74254	36	Bacias costeiras na Lagoa de Araruama
673	65	Glandulocaudinae	111	Mimagoniates sylvicola Menezes & Weitzman, 1990	Riacho próximo a fazenda Embaçuaba (=Embassuaba), Município de Prado, Estado da Bahia, Brasil.	Riachos costeiros do sul do Estado da Bahia.	Ribeir╞o Imbaçuaba, Prado	Arcmap	RR	NAM	-17.0811	-39.2802	17	4	52	s	39	16	49	8	PAB	PAB: As coordenadas est╞o corretas, mas precisa verificar com NAM se a distribuiç╞o é RR.	Localidade-tipo	Menezes & Weitzman (1990).	Estado de Conservaç╞o: Vulnerável.		Atlantic forest	110868	Northeastern Mata Atlantica	ATLANTICO LESTE	EN	B1a, b i;iii	5	ALE23	33.2702	41	Riacho dos Palmares e riachos da costa sul da Bahia
678	587	Gymnotidae	145	Gymnotus bahianus Campos-da-Paz & Costa, 1996	Fazenda Almada, Ilhéus, aproximadamente 14°49'S 39°02'W, bacia do rio Almada, Estado da Bahia, Brasil.	Espécie conhecida da localidade-tipo e áreas adjacentes no Estado da Bahia,		Buckup et al 2007	RR	NAM	-14.8167	-39.0333	14	49	0	s	39	2	0	8	PAB	PAB	Localidade-tipo				Atlantic forest	77755.3	Northeastern Mata Atlantica	ATLANTICO LESTE	VU	D2	4	ALE39	13.7108	86	Bacias costeiras em Una, BA
78	589	Gymnotidae	145	Gymnotus obscurus Crampton, Thorsen & Albert, 2005	Cano do lago Mamirauá, na Comunidade Boca do Mamirauá, 3°06'37"S 64°47'49"W, Reserva Mamirauá, Estado do Amazonas, Brasil.	╡rea da Reserva Mamirauá, próximo a Tefé, Estado do Amazonas.	Corrigido para 2 50 46 64 58 21 para ajuste na UC	Buckup et al 2007	RR	NAM	-2.8461	-64.9725	2	50	46	s	64	58	21	13	NAM	OTO	Localidade-tipo	Crampton et al. (2005).			Amazonia	297994	Amazonas Lowlands	AMAZONICA	VU	D2	6	AMA25	84.5803	78	Rio Japurá
650	588	Gymnotidae	145	Gymnotus diamantinensis Campos-da-Paz, 2002	Riacho 1 tributário do rio Preto (alto rio Arinos, bacia do Tapajós), na estrada para S╞o Francisco, Municipio de Diamantino, aproximadamente 14°20'S 46°30'W, Estado de Mato Grosso, Brasil.	cabeceiras do rio Arinos.		Buckup et al 2007	RR	NAM	-14.3281	-56.3175	14	19	41	s	56	19	3	5	NAM	OTO, CN	Localidade-tipo				CERRADO	93980.8	Tapajos - Juruena	AMAZONICA	EN	B1a, b i;iii	5	AMA73	0	70	Bacia do Rio Preto, Afluente do Arinos
2	41	Hemiodontidae	108	Hemiodus jatuarana Langeani, 2004	Rio Trombetas, Oriximiná, Estado do Pará, Brasil.	Espécie conhecida apenas da localidade-tipo.	Oriximiná	CIVI IBGE	RRT	NAM	-1.7656	-55.8661	1	45	56	s	55	51	58	12	OTO	OTO	Localidade-tipo	Langeani (1996).			Amazonia	356856	Amazonas Lowlands	AMAZONICA	VU	D2	5	AMA02	21.8482	56	Igarapé Saracá/Araticum
120	42	Hemiodontidae	108	Hemiodus parnaguae Eigenmann & Henn, 1916	Lagoa de Parnaguá, Estado do Piaui, Brasil.	Rio Parnaiba.	Lagoa de Parnaguá, PI	Species link - MZUSP	RR	NAM	-5.0833	-42.7999	0	0	0		0	0	0	7	OTO	OTO	Localidade-tipo	Langeani (1996).			CERRADO	57218.8	Parnaiba	PARNAIBA	VU	D2	5	PNB06	0.0340172	100	Rio Poty, bacia do Parnaíba
216	539	Heptapteridae	138	Pimelodella itapicuruensis Eigenmann, 1917	Queimadas, rio Itapicuru, Estado da Bahia, Brasil.	Bacia do Itapicuru.	Queimadas, rio Itapicuru, Bahia	Arcmap	RR	NAM	-10.9761	-39.8	10	58	34	s	39	48	0	6	NAM	OTO	Localidade-tipo				Caatinga	343287	Northeastern Mata Atlantica	ATLANTICO LESTE	VU	D2	4	ALE05	0.780398	78	Rio Itapicuru mirim
20	524	Heptapteridae	138	Brachyrhamdia rambarrani (Axelrod & Burgess «in» Axelrod, 1987)	Rio Unini, tributário do rio Negro, Estado do Amazonas, Brasil.	Rio Unini (afluente do Negro).	Rio Unini, afl. Rio Negro	Species link MZUSP	RR	NAM	-1.6666	-61.5333	0	0	0		0	0	0	12	OTO	OTO	Localidade-tipo				Amazonia	99653.2	Rio Negro	AMAZONICA	VU	D2	6	AMA04	95.3318	84	Baixo Rio Unini
434	526	Heptapteridae	138	Chasmocranus brevior Eigenmann, 1912	Waratuk.	Bacias costeiras no Estado do Amapá.	Costa do Amapá, UC Cabo orange	ARCMAP	RR	NAM	3.0833	-51.0941	3	5	32	n	51	5	39	4	NAM	OTO	Lote de referência (L1RP 3271).				Amazonia	29051.6	Amazonas Estuary & Coastal Drainages	AMAZONICA	VU	D2	5	AMA119	100	99	Igarapé Grande Crique
709	852	Heptapteridae	138	Phreatobius cisternarum Göldi, 1905	╡gua no interior de um lençol freático profundo na desembocadura do rio Amazonas na Ilha de Marajó, Brasil.	Lençóis freáticos na Ilha de Marajó, na desembocadura do Amazonas.	Ilha de marajó me frente a Belém		RR	OTO	-1.2017	-48.8539	1	12	6	s	48	51	14	0		PAB: 01 14 00 s 48 47 w (Ilha de Marajó, em frente a Belém), cai no canal, corrigido para 1 12 6 48 51 14 arcmap	Localidade-tipo	Bockmann (1998), Carvalho (1967).			Amazonia	29615.7	Amazonas Estuary & Coastal Drainages	AMAZONICA	VU	D2	4	AMA121	99.0108	100	Lencóis freáticos na Ilha de Marajó, em frente a Belém
704	552	Heptapteridae	138	Rhamdia itacaiunas Silfvergrip, 1996	Bacia do rio Tocantins, igarapé Repartimento, Estado do Amazonas, Brasil.	Médio Tocantins.	Igarapé Repartimento. N╞o é Amazonas, e sim PA, na bacia do Tocantins	USBGN e ARCMAP	RR	OTO	-3.7	-49.4167	3	42	0	s	49	25	0	4	NAM	OTO	Localidade-tipo				Amazonia	193486	Amazonas Estuary & Coastal Drainages	ATLANTICO NORDESTE OCIDENTAL	EN	B1a, b i;iii	6	ANOC08	0.276494	38	Igarapé Repartimento
574	548	Heptapteridae	138	Rhamdella papariae Fowler, 1941	Lago Papa ri, Estado do Rio Grande do Norte, Brasil.	Espécie conhecida apenas da localidade-tipo.	Lago papari	USBGN	RRT	NAM	-6.1167	-35.1667	6	7	0	s	35	10	0	7	OTO	OTO	Localidade-tipo	Bockmann (1998).			Atlantic forest	54865.7	Northeastern Caatinga & Coastal Drainages	ATLANTICO NORDESTE ORIENTAL	EN	B1a, b i;iii	5	ANOR10	43.1263	14	Lago Papari
557	550	Heptapteridae	138	Rhamdella wolfi Fowler, 1941	Rio Choró, Estado do Ceará, Brasil.	Espécie conhecida apenas da localidade-tipo.	Rio Choró, Foz, Arcmap depois de coord USBGN	Arcmap	RRT	NAM	-4.1	-38.1667	4	6	0	s	38	10	0	7	OTO	OTO	Localidade-tipo	Bockmann (1998).			Caatinga	545077	Northeastern Caatinga & Coastal Drainages	ATLANTICO NORDESTE ORIENTAL	VU	B1a, b i;iii	4	ANOR11	5.73739	64	Drenagens costeiras em Fortaleza
564	545	Heptapteridae	138	Pimelodella witmeri Fowler, 1941	Rio Jaguaribe, Orós, Estado do Ceará, Brasil.	Bacia do Jaguaribe.	Rio Jaguaribe, Ceará	Buckup et al. 2007	RR	NAM	-6.2486	-38.9172	6	14	55	s	38	55	2	7	OTO	OTO	Localidade-tipo				Caatinga	186278	Northeastern Caatinga & Coastal Drainages	ATLANTICO NORDESTE ORIENTAL	EN	B1a, b i;iii	6	ANOR12	0	74	Afluentes do Açude de Orós
451	546	Heptapteridae	138	Rhamdella ignobilis Steindachner, 1907	Rio Cubat╞o no Estado de Santa Catarina próximo a Teresópolis (Brasil).	Bacia do Cubat╞o, no Estado de Santa Catarina.	Rio S╞o Jo╞o	Arcmap	RR	NAM	-27.6881	-48.8215	0	0	0		0	0	0	1	PAB	PAB: Corrigir para -27.68810 -48.82154 (Aguas Morna, a localidade conforme Lucena & Lucena, 1990)	Localidade-tipo	Bockmann (1998).			Atlantic forest	79009.7	Southeastern Mata Atlantica	ATLANTICO SUL	VU	D2	5	ASU02	35.8931	76	Rio Cubatão, Santa Catarina
776	531	Heptapteridae	138	Heptapterus sympterygium Buckup, 1988	Canal no lado leste da rodovia BR-471 próximo a casa de bombas do Departamento Nacional de Obras de Saneamento, 32°32'S 52°31'W, Estaç╞o Ecológica do Taim, Rio Grande, Estado do Rio Grande d	Alagados e águas lênticas das baixadas costeiras do leste do Estado do Rio		Buckup et al 2007	RR	NAM	-32.5333	-52.5167	32	32	0	s	52	31	0	1	PAB	PAB	Localidade-tipo				Pampas	91965.7	Laguna dos Patos	ATLANTICO SUL	VU	D2	5	ASU30	16.1997	41	Drenagens do Banhado do Taim
125	541	Heptapteridae	138	Pimelodella parnahybae Fowler, 1941	Rio Parnaiba, Teresina, Estado do Piaui, Brasil.	Bacia do Parnalba.	Rio Parnaíba, Teresina, Piaui	Species link MZUSP	RR	NAM	-7.5355	-46.0377	0	0	0		0	0	0	4	NAM	OTO	Localidade-tipo				CERRADO	39359.6	Parnaiba	PARNAIBA	VU	D2	5	PNB08	0	100	Rio das Balsas
364	530	Heptapteridae	138	Heptapterus stewarti Haseman, 1911	Serrinha, em um riacho cerca de meia milha do rio Iguaçu, Estado do Paraná, Brasil.	Alto Iguaçu.	Serrinha, riacho afl. Rio Iguaçu	Buckup et al. 2007	RR	NAM	-25.5833	-49.5	25	35	0	s	49	30	0	2	OTO	OTO	Localidade-tipo	Bockmann (1998), Severi & Cordeiro (1994).			Atlantic forest	25246.8	Iguassu	PARANA	EN	B1a, b i;iii	6	PRN52	0.437546	39	Riacho Serrinha
519	543	Heptapteridae	138	Pimelodella spelaea Trajano, Reis & Bichuette, 2004	Riacho subterrâneo tributário do rio S╞o Bernardo, bacia do alto Tocantins, interior da Caverna S╞o Bernardo, 13°49'S 46°21'W, S╞o Domingos, Estado de Goiás, Brasil.	Espécie conhecida apenas da localidade-tipo.		Buckup et al 2007	RRT	NAM	-13.8167	-46.35	13	49	0	s	46	21	0	5	NAM	OTO	Localidade-tipo				CERRADO	115256	Tocantins - Araguaia	TOCANTINS-ARAGUAIA	VU	D2	6	TOAR33	53.8997	85	Rio São Mateus, BAcia do Rio Paranan
22	600	Hypopomidae	148	Stegostenopos cryptogenes Triques, 1997	Igarapé Sirinau, margem direita do rio Cuieiras, cerca de 25 km da boca do rio Negro, 20º70'S 60°40' W, Estado do Amazonas, Brasil.	Espécie conhecida apenas da localidade-tipo.	coord fornecida em Buckup et al 2007 errada, usei Sternopygys castroi do MZUSP	Species link Mzusp ver Sterno	RRT	NAM	-2.7	-60.3333	0	0	0		0	0	0	12	OTO	OTO	Localidade-tipo				Amazonia	354775	Rio Negro	AMAZONICA	VU	D2	5	AMA05	88.2962	93	Rio Cuieiras
612	598	Hypopomidae	148	Brachyhypopomus janeiroensis (Costa & Campos-da-Paz, 1992)	Córrego Saito d'╡gua, afluente do rio S╞o Jo╞o, Municipio de Silva Jardim, Estado do Rio de Janeiro, Brasil.	Bacias costeiras do leste do Brasil, entre os estados do Rio de Janeiro e S	Alto Rio S╞o jo╞o, Em Silva Jardim, mesma de Hemodiaetus banguela, Species Link	Species Link Hemodiateus bang	RR	OTO	-22.5666	-42.5666	0	0	0		0	0	0	8	PAB	PAB	Localidade-tipo	Costa & Campos-da-Paz (1992).			Atlantic forest	58494	Fluminense	ATLANTICO SUDESTE	EN	B1a, b i;iii	5	ASE43	98.0138	54	Rio São João, em Silva Jardim
217	372	Hypoptopomatinae	136	Parotocinclus minutus Garavello, 1977	Rio Vasa-Barris, Canudos, Estado da Bahia, Brasil.	Bacia do Vasa-Barris.	Rio Vaza Barris em Canudos	Arcmap	RR	NAM	-10.0831	-38.9661	10	4	59	s	38	57	58	6	NAM	OTO	Localidade-tipo				Caatinga	140053	Northeastern Mata Atlantica	ATLANTICO LESTE	VU	D2	5	ALE06	0.138785	88	Riacho Do Rosario, Bacia do Vaza Barris
252	363	Hypoptopomatinae	136	Otothyris travassosi Garavello, Britski & Schaefer, 1998	Rio Barra Seca na estrada de Unhares para S╞o Mateus, Estado do Espirito Santo, Brasil.	Bacias costeiras do sudeste do Brasil.	Rio Barra Seca x BR, entre Linhares e S Mateus	ARCMAP	RR	OTO	-18.9978	-39.9923	18	59	52	s	39	59	32	8	PAB	PAB	Localidade-tipo	Garavello ai ai. (1998).			Atlantic forest	145943	Northeastern Mata Atlantica	ATLANTICO LESTE	EN	B1a, b i;iii	6	ALE26	10.3206	18	Rio Barra Seca
253	371	Hypoptopomatinae	136	Parotocinclus jimi Garavello, 1977	Rio do Peixe, tributário do Contas, fazenda Pedra Branca, Itagibá, Estado da Bahia, Brasil.	Bacia do Contas.		Species link MZUSP 24576	RR	NAM	-14.2	-39.83	0	0	0		0	0	0	8	PAB	PAB	Localidade-tipo				Atlantic forest	41853	Northeastern Mata Atlantica	ATLANTICO LESTE	EN	B1a, b i;iii	6	ALE27	0	61	Rio do Peixe e Rio de Contas
679	369	Hypoptopomatinae	136	Parotocinclus cristatus Garavello, 1977	Fazenda Almada, ilhéus, Estado da Bahia, Brasil.	Rios costeiros próximo a Ilhéus, Estado da Bahla, Brasil.		Buckup et al 2007	RR	NAM	-14.7069	-39.0764	14	42	25	s	39	4	35	8	PAB	PAB: Modificar para 14 42 25 s 39 04 35 w (rio Almada)	Localidade-tipo				Atlantic forest	10232.7	Northeastern Mata Atlantica	ATLANTICO LESTE	EN	B1a, b i;iii	5	ALE40	90.8102	60	Rio Almada
566	367	Hypoptopomatinae	136	Parotocinclus cearensis Garavello, 1977	Cachoeira do Gusm╞o, Ipu, Estado do Ceará, Brasil.	Estado do Ceará.	Cachoeira do Gusm╞o, Ipu, Ceará	Fuzzy Gazetteer	RR	NAM	-4.3333	-40.7	4	20	0	s	40	42	0	7	OTO	OTO	Localidade-tipo				Caatinga	133581	Northeastern Caatinga & Coastal Drainages	ATLANTICO NORDESTE ORIENTAL	VU	D2	4	ANOR03	2.59706	69	Cachoeira do Gusmão, Bacia do Acara·
567	375	Hypoptopomatinae	136	Parotocinclus spilosoma (Fowler, 1941)	Campina Grande, Estado da Paraiba, Brasil.	Estado da Paraiba.	Campina Grande, Paraíba	Fuzzy Gazetteer	RR	NAM	-7.2167	-35.8833	7	13	0	s	35	53	0	7	OTO	OTO	Localidade-tipo				Caatinga	45809.3	Northeastern Caatinga & Coastal Drainages	ATLANTICO NORDESTE ORIENTAL	EN	B1a, b i;iii	5	ANOR04	0.01494	5	Afluente do Paraíba em Campina Grande
568	376	Hypoptopomatinae	136	Parotocinclus spilurus (Fowler, 1941)	Rio Salgado, Icó, Estado do Ceará, Brasil.	Estado do Ceará.	Rio Salgado CE	USBGN e ARCMAP	RR	NAM	-6.4275	-38.8825	6	25	39	s	38	52	57	7	OTO	OTO	Localidade-tipo				Caatinga	104654	Northeastern Caatinga & Coastal Drainages	ATLANTICO NORDESTE ORIENTAL	EN	B1a, b i;iii	5	ANOR05	0	58	Rio Salgado, Bacia do Jaguaribe
573	368	Hypoptopomatinae	136	Parotocinclus cesarpintoi Miranda Ribeiro, 1939	Quebr╞ngulo, Estado de Alagoas, Brasil.	Rios costeiros do Estado de Alagoas.	Quebrangulo	USBGN	RR	NAM	-9.3333	-36.4833	9	20	0	s	36	29	0	6	NAM	OTO	Localidade-tipo				Atlantic forest	80996.5	Northeastern Caatinga & Coastal Drainages	ATLANTICO NORDESTE ORIENTAL	VU	D2	6	ANOR09	3.25171	52	Riacho Bretão
777	356	Hypoptopomatinae	136	Hisonotus taimensis (Buckup, 1981)	Novo canal do arroio Taim, Estaç╞o Ecológica do Taim, Estado do Rio Grande do Sul, Brasil.	Bacias costeiras do Estado do Rio Grande do Sul.	EE do Taim	Arcmap	RR	NAM	-32.5639	-52.5656	32	33	50	s	52	33	56	1	PAB	PAB: Corrigir para 32 33 50 s 52 33 56 w(Canal do arroio Taim)	Localidade-tipo				Pampas	91965.7	Laguna dos Patos	ATLANTICO SUL	VU	D2	5	ASU30	16.1997	41	Drenagens do Banhado do Taim
778	377	Hypoptopomatinae	136	Parotocinclus zsp. 2		Bacia da laguna dos Patos.	Sanga afluente do arroio Arambaré (trib. rio Basilio [=rio Santa Rosa] -> rio Piratini -> canal S╞o Gonçalo"	MCP 20273	RR	NAM	-31.9	-53.0167	31	54	0	s	53	1	0	1	PAB	PAB	Lote de referência (MCP 20273).				Pampas	39003.2	Laguna dos Patos	ATLANTICO SUL	VU	D2	6	ASU31	0	80	Arroio Arambaré
811	362	Hypoptopomatinae	136	Otothyris rostrata Garavello, Britski & Schaefer, 1998	Canal entre a lagoa Emboaba e lagoa Emboabinha, na estrada entre Osório e Tramandai, Osório, Estado do Rio Grande do Sul, Brasil.	Bacias costeiras dos estados de Santa Catarina e Rio Grande do Sul.	Drenagem costeira entre Osorio e Tramandai, em Osorio, RS	Arcmap	RR	OTO	-29.9478	-50.1564	29	56	52	s	50	9	23	1	PAB	PAB	Localidade-tipo	Garavello ai ai. (1998).			Pampas	21193.9	Tramandai - Mampituba	ATLANTICO SUL	EN	B1a, b i;iii	6	ASU52	0	37	Drenagens costeiras em Osório e Tramandaí
114	370	Hypoptopomatinae	136	Parotocinclus heraldoi Garavello, 1988	Córrego Otaviano, poço do Sanharó, riacho Sanharó, Estado do Piaui, Brasil.	Estado do Piauí.	Córrego Otaviano, riacho Sanharó, Piauí	Fuzzy Gazetteer	RR	NAM	-6.9833	-40.6333	6	59	0	s	40	38	0	7	OTO	OTO	Localidade-tipo				Caatinga	104947	Parnaiba	PARNAIBA	EN	B1a, b i;iii	6	PNB02	0	55	Corrego Otaviano/Maçal
532	359	Hypoptopomatinae	136	Otocinclus tapirape Britto & Moreira, 2002	Córrego ╡gua Parada, tributário do Pintado, 11 km a oeste de Novo Planalto, sistema do Araguaia, Estado de Goiás, Brasil.	Bacia do Araguaia.	Afluente do Pintado, a 11 km a W de Novo Planalto, GO	ARCMAP	RR	OTO	-13.2528	-49.5814	13	15	10	s	49	34	53	5	NAM	OTO	Localidade-tipo				CERRADO	97725.1	Tocantins - Araguaia	TOCANTINS-ARAGUAIA	EN	B1a, b i;iii	5	TOAR43	0	16	Corrego Agua Parada e Bacia do Pintado
677	434	Hypostominae	136	Hypostomus unae (Steindachner, 1878)	Rio Una, Brasil.	Bacia do Una, Estado da Bahia.	Rio Una BA	USBGN	RR	NAM	-15.2472	-39.0506	15	14	50	s	39	3	2	8	PAB	PAB: Corrigir para 15 14 50 s 39 03 02 w (Una). **Atenç╞o: Apesar desta correç╞o, tenho dévidas se a localidade é esta ou outro dos vários rios Una do Brasil (alguns dos quais s╞o	Localidade-tipo				Atlantic forest	39659.4	Northeastern Mata Atlantica	ATLANTICO LESTE	VU	D2	4	ALE39	13.7108	86	Bacias costeiras em Una, BA
680	449	Hypostominae	136	Pareiorhaphis bahianus (Gosline, 1947)	Fazenda Almada, Municipio de IIheus, Estado da Bahia, Brasil.	Pequenas drenagens costeiras próximas a Ilhéus, entre as bacias dos rios Pa	Rio Almada BA, Pereira e Reis 2002	Arcmap	RR	NAM	-14.7069	-39.0764	14	42	25	s	39	4	35	8	PAB	PAB	Localidade-tipo				Atlantic forest	10232.7	Northeastern Mata Atlantica	ATLANTICO LESTE	EN	B1a, b i;iii	5	ALE40	90.8102	60	Rio Almada
69	430	Hypostominae	136	Hypostomus soniae Hollanda Carvalho & Weber, 2004	Lagoas temporárias nas margens do rio Tapajós, entre Vila Nova e Uruá, Estado do Pará, Brasil.	Espécie conhecida apenas da localidade-tipo.	Uruá falls PA	USBGN	RRT	NAM	-4.6	-56.2333	4	36	0	s	56	14	0	12	OTO	OTO	Localidade-tipo				Amazonia	13587.5	Amazonas Lowlands	AMAZONICA	VU	D2	5	AMA18	16.8256	81	Margem direita do Rio Tapajós
628	426	Hypostominae	136	Hypostomus pantherinus Kner, 1854	Rio Guaporé, alto Amazonas, Brasil.	Especie conhecida apenas da localidade-tipo.	Forte Principe da Beira	USBGN	RRT	NAM	-12.4167	-64.4167	12	25	0	s	64	25	0	14	PAB	PAB	Localidade-tipo				Amazonia	75181.6	Guapore - Itenez	AMAZONICA	EN	B1a, b i;iii	4	AMA61	6.81393	94	Rio Guaporé, em Forte Príncipe da Beira
18	458	Hypostominae	136	Pareiorhaphis regani Giltay, 1936	Rio Curi Curiay (atualmente Curicuriari), sul do alto rio Negro, Estado do Amazonas, Brasil.	Rio Curicuriari e possivelmente no rio Jaé, tributários do rio Negro, bacia	Rio Curicuriari, medio curso a montante da boca do Capauari	ARCMAP	RR	OTO	0.4333	-67.6733	0	26	34	n	67	40	24	13	NAM	OTO	Localidade-tipo	Pereira & Reis (2002).			Amazonia	10390.5	Rio Negro	AMAZONICA	VU	D2	6	AMA95	0	100	Rio Curicuriari
701	469	Hypostominae	136	Squaliforma annae (Steindachner, 1881)	Estado do Pará (= Belém, Brasil).	Bacia do Guamá.		Buckup et al 2007	RR	NAM	-1.5686	-47.1689	1	34	7	s	47	10	8	4	NAM	OTO	Localidade-tipo	lsbrücker et al. (2001).			Amazonia	48713.2	Amazonas Estuary & Coastal Drainages	ATLANTICO NORDESTE OCIDENTAL	EN	B1a, b i;iii	6	ANOC06	0	26	Rio Guamá e afluentes, médio curso
560	416	Hypostominae	136	Hypostomus carvalhoi (Miranda Ribeiro, 1937)	Rio Granjeiro, Crato, Estado do Ceará, Brasil.	Bacia do Jaguaribe.	Rio Granjeiro, Crato, CE	Buckup et al. 2007	RR	NAM	-7.1667	-39.4167	7	10	0	s	39	25	0	7	OTO	OTO	Localidade-tipo				Caatinga	186278	Northeastern Caatinga & Coastal Drainages	ATLANTICO NORDESTE ORIENTAL	EN	B1a, b i;iii	5	ANOR01	44.4851	53	Bacia dos rios Granjeiro e Salgado, Crato
561	421	Hypostominae	136	Hypostomus jaguribensis (Fowler, 1915)	Rio Jaguaribe, Barro Alto, Brasil.	Bacia do Jaguaribe.	Rio Jaguaribe, Barro Alto, CE	Buckup et al. 2007	RR	NAM	-7.1667	-39.4167	7	10	0	s	39	25	0	7	OTO	OTO	Localidade-tipo				Caatinga	186278	Northeastern Caatinga & Coastal Drainages	ATLANTICO NORDESTE ORIENTAL	EN	B1a, b i;iii	5	ANOR01	44.4851	53	Bacia dos rios Granjeiro e Salgado, Crato
562	470	Hypostominae	136	Squaliforma gomesi (Fowler, 1941)	Estado do Ceará, Brasil.	Bacia do Jaguaribe.	Bacia do rio Jaguaribe, Ceará	Buckup et al. 2007	RR	NAM	-6.2486	-38.9172	6	14	55	s	38	55	2	7	OTO	OTO	Localidade-tipo				Caatinga	186278	Northeastern Caatinga & Coastal Drainages	ATLANTICO NORDESTE ORIENTAL	EN	B1a, b i;iii	6	ANOR12	0	74	Afluentes do Açude de Orós
619	452	Hypostominae	136	Pareiorhaphis garbei Ihering, 1911	Curso superior, montanha acima, rio Macaé, Estado de Rio de Janeiro, Brasil.	Tributários de rios ao sul da serra dos αrg╞os, bacias do Macaé e do Macacu	Alto Rio Macaé, RJ	ARCMAP	RR	OTO	-22.3272	-41.9758	22	19	38	s	41	58	33	8	PAB	PAB	Localidade-tipo	Pereira & Reis (2002).	Estado de Conservaç╞o: Em perigo.	Categoria de ameaça em listas regionais: Em perigo	Atlantic forest	5487.57	Fluminense	ATLANTICO SUDESTE	CR	B1a, b i;iii	6	ASE47	0	23	Alto Rio Macaé
452	450	Hypostominae	136	Pareiorhaphis calmoni (Steindachner, 1907)	Rio Cubat╞o, próximo ao Municipio de ╡gua Mornas, Estado de Santa Catarina, Brasil.	Bacias dos rios Cubat╞o, Tubar╞o e Araranguá e riachos costeiros no Estado	Rio Cubat╞o em Aguas Mornas, SC	ARCMAP	RR	OTO	-27.7519	-48.9033	27	45	7	s	48	54	12	1	PAB	PAB: Corrigir movendo o ponto mais para montante, para o município de ╡guas Mornas	Localidade-tipo				Atlantic forest	79009.7	Southeastern Mata Atlantica	ATLANTICO SUL	VU	D2	5	ASU02	35.8931	76	Rio Cubatão, Santa Catarina
807	456	Hypostominae	136	Pareiorhaphis nudulus Reis & Pereira, 1999	Rio Jord╞o em Jord╞o Alto, aproximadamente 28'35'S 49'27'W, Municlpio de Nova Veneza, Estado de Santa Catarina, Brasil.	Bacia do Araranguá (sul do Estado de Santa Catarina), e bacias do Mampituba		Pereira e Reis 2002	RR	NAM	-28.5833	-49.45	28	35	0	s	49	27	0	1	PAB	PAB	Localidade-tipo	Pereira & Reis (2002).			Atlantic forest	7728.18	Tramandai - Mampituba	ATLANTICO SUL	CR	B1a, b i;iii	6	ASU48	2.29183	40	Rio Jordão Alto
694	457	Hypostominae	136	Pareiorhaphis parmula Pereira, 2005	Rio dos Patos, 25°50'36,8"S 49°43'39,2'W, tributário do rio da Várzea, estrada PR-427 entre Lapa e Campo do Tenente, bacia do Iguaçu, Município de Lapa, Estado do Paraná, Brasil.	Bacia do rio dos Patos, nas cabeceiras da bacia do Iguaçu, no Estado do Par		Buckup et al 2007	RR	NAM	-25.8436	-49.7276	25	50	37	s	49	43	39	2	OTO	OTO	Localidade-tipo				Atlantic forest	28428	Iguassu	PARANA	EN	B1a, b i;iii	6	PRN43	6.37822	58	Foz do Rio da Várzea
174	436	Hypostominae	136	Hypostomus vaillanti (Steindachner, 1877)	Rio Preto em Villa de Santa Rita, Estado da Bahia, Brasil.	Bacia do S╞o Francisco, na drenagem do rio Preto.	Santa Rita de Cassia, BA	Arcmap	RR	NAM	-10.9984	-44.5113	10	59	54	s	44	30	41	6	NAM	OTO	Localidade-tipo	Mazzoni et al. (1994).			CERRADO	268531	S. Francisco	S├O FRANCISCO	VU	D2	6	SFR18	25.5593	100	Foz do Rio Preto
442	451	Hypostominae	136	Pareiorhaphis eurycephalus Pereira & Reis, 2002	Riacho tributário do rio Canoas ao leste da Vila S╞o José, na estrada para serra do Corvo Branco, 28'03'33"S 49'25'42"W, Municipio de Urubici, Estado de Santa Catarina, Brasil.	Bacia do alto Canoas, no Estado de Santa Catarina.		Pereira e Reis 2002	RR	NAM	-28.0592	-49.4283	28	3	33	s	49	25	42	5	NAM	PAB: Corrigir para 28 03 33 S 49 25 42 W	Localidade-tipo				Atlantic forest	23945.2	Upper Uruguay	URUGUAI	EN	B1a, b i;iii	5	URU04	18.8951	34	Bacia do Alto Canoas, em Urubici
208	157	Incertae	115	Hyphessobrycon negodagua Lima & Gerhard, 2001	Rio Pratinha na fazenda Pratinha, 12°21'13"S 41°32'51''W, Municipio de Iraquara, Estado da Bahia, Brasil.	Bacia do alto Paraguaçu.		Buckup et al 2007	RR	NAM	-12.2405	-41.6106	12	14	26	s	41	36	38	6	NAM	OTO	Localidade-tipo				Caatinga	78243.4	Northeastern Mata Atlantica	ATLANTICO LESTE	EN	B1a, b i;iii	5	ALE01	38.1928	18	Rio Pratinha e Bacia do Agua de Rega
209	196	Incertae	115	Myxiops aphos Zanata & Akama, 2004	rio Lenç6is, 12°34'S 41°22'W, tributário do rio Paraguaçu, 3 km a montante de Lenç6is, acima da cachoeira do Serrano, Lençois, Estado da Bala, Brasil.	Espécie conhecida apenas da localidade-tipo.		Buckup et al 2007	RRT	NAM	-12.5667	-41.3667	12	34	0	s	41	22	0	6	NAM	OTO	Localidade-tipo				Caatinga	33137.4	Northeastern Mata Atlantica	ATLANTICO LESTE	VU	D2	6	ALE02	99.9711	100	Rio Lencóis
240	95	Incertae	115	Astyanax pelecus Bertaco & Lucena, 2006	Rio Pardo, na rodovia BR-116, C╞ndido Sales, Estado da Bahia, Brasil.	Espécie conhecida apenas da localidade-tipo.	Candido Sales	CIVI IBGE	RR	NAM	-15.505	-41.2392	15	30	18	s	41	14	21	8	PAB	PAB	Localidade-tipo				Atlantic forest	23125.2	Northeastern Mata Atlantica	ATLANTICO LESTE	EN	B1a, b i;iii	6	ALE19	0	43	Rio Pardo e Afluente em Candido Sales
241	159	Incertae	115	Hyphessobrycon parvellus Ellis, 1911	Alagoinhas, rio Caté, Brasil.	Drenagens costeiras do Estado da Bahia.	Rio Catu, BA	USBGN	RR	NAM	-12.4	-38.3333	12	24	0	s	38	20	0	6	NAM	OTO	Localidade-tipo	Lima & Gerhard (2001).			Atlantic forest	43012.6	Northeastern Mata Atlantica	ATLANTICO LESTE	EN	B1a, b i;iii	5	ALE20	0	3	Rio Catu, Alagoinhas
674	204	Incertae	115	Rachoviscus graciliceps Weitzman & Cruz, 1981	Riacho cerca de 1 km ao norte de Prado e aproximadamente 500 m do Oceano Atlântico, Estado da Bahia, Brasil. Distribuiçâo: Riachos litorâneos do sul do Estado da Bahia.	Distribuiçâo: Riachos litorâneos do sul do Estado da Bahia.	Prado, arredores, prox à costa	Arcmap	RR	OTO	-17.3148	-39.2244	17	18	53	s	39	13	28	8	PAB	PAB	Bibliográfica I Lote de referência (MZUSP 14387).	Weitzman & Cruz (1981).	Estado de Conservaç╞o: Em perigo.	Categoria de ameaça em listas regionais: Criticame	Atlantic forest	110868	Northeastern Mata Atlantica	ATLANTICO LESTE	EN	B1a, b i;iii	5	ALE23	33.2702	41	Riacho dos Palmares e riachos da costa sul da Bahia
264	150	Incertae	115	Hyphessobrycon itaparicensis Lima & Costa, 2001	Pequeno riacho na liha de Itaparica, Estado da Bahia, Brasil.	Espécie conhecida apenas da localidade-tipo.	Ilha Itaparica	USBGN	RRT	NAM	-13	-38.7	13	0	0	s	38	42	0	6	NAM	OTO	Localidade-tipo				Atlantic Forest	15546.8	Northeastern Mata Atlantica	ATLANTICO LESTE	VU	D2	5	ALE36	100	77	Ilha de Itaparica
54	114	Incertae	115	Creagrutus cracentis Vari & Harold, 2001	Rio Tapajós, praias em uma ilha localizada 5 km ao sul de Itaituba (éltima localidade situada em 4°17'S 55°59'W), Brasil.	Bacia do Tapajós, no Estado do Pará.	5 km ao sul de Itaituba, bacia do Tapajós, PA	Buckup et al. 2007	RR	NAM	-4.2833	-55.9833	4	17	0	s	55	59	0	12	OTO	OTO	Localidade-tipo	Vari & Harold (2001).			Amazonia	73512.6	Amazonas Lowlands	AMAZONICA	EN	B1a, b i;iii	5	AMA10	1.36259	24	Rio Tapajos, Foz do Igarapé Capituã
56	177	Incertae	115	Jupiaba poekotero Zanata & Lima, 2005	Praia em lagoa abaixo da Cachoeira do Caruru, 0°16'28,9"N 69°54'53,6"W, aldeia indigena de Caruru, rio Tiquié, Estado do Amazonas, Brasil.	Alto rio Tiquié (tributário do baixo curso do rio Uaupés, drenagem do alto		Buckup et al 2007	RR	NAM	-0.2747	-69.9149	0	16	29	s	69	54	54	13	NAM	OTO	Localidade-tipo				Amazonia	139469	Amazonas Lowlands	AMAZONICA	EN	B1a, b i;iii	6	AMA116	99.8832	99	Rio Traíra
432	139	Incertae	115	Hyphessobrycon amapaensis Zarske & Géry, 1998	Aproximadamente 45 km ao norte de Macapá, pequeno riacho de savana na BR 156 no Sitio Camaipi, próximo de Santa Clara, aproximadamente 11 km do Sitio Camaipi (bacia do rio Preto), Estado do	Baixo Amazonas.	45 km N Macapa	Arcmap	RR	NAM	0.35	-51.1167	0	21	35	n	51	7	0	4	NAM	OTO	Localidade-tipo				Amazonia	38169	Amazonas Estuary & Coastal Drainages	AMAZONICA	EN	B1a, b i;iii	5	AMA118	0	60	Rio Flechal, Bacia do Matapi
111	156	Incertae	115	Hyphessobrycon mutabilis Costa & Géry, 1994	Afiuente do rio Sete de Setembro, bacia do Xingu, 107 km ao sudoeste de Canarana, 13°51'S 52°40'W, Estado do Mato Grosso, Brasil.	Bacia do alto Xingu.		Buckup et al 2007	RR	NAM	-13.85	-52.6667	13	51	0	s	52	40	0	3	OTO	OTO	Localidade-tipo				CERRADO	30284.4	Xingu	AMAZONICA	VU	D2	6	AMA45	0	100	Corrego Fundo
642	148	Incertae	115	Hyphessobrycon heliacus Moreira, Landim & Costa, 2002	Ribeir╞o Macuco ( = Córrego Duas Bocas), afluente do rio Teles Pires, bacia do rio Tapajós, 71,9 km de Sinop, Municipio de Cláudia, na BR-163 em direç╞o a Santarém, Estado de Mato Grosso, Br	Bacia do alto Tapajós.	Ribeir╞o Macuco (= córrego Duas-bocas), à 71,9 Km N de Sinop na BR-163 em direç╞o a Santarém (afl. do rio Teles	Species link MZUSP	RR	NAM	-11.4166	-55.3499	0	0	0		0	0	0	4	NAM	OTO	Localidade-tipo				Amazonia	14665.7	Tapajos - Juruena	AMAZONICA	EN	B1a, b i;iii	6	AMA66	0	66	Corrego Loanda
643	163	Incertae	115	Hyphessobrycon scutulatus Lucena, 2003	Rio Kaiapá, estrada MT 320, aproximadamente 5 km de Nova Cana╞ do Norte, bacia do Teles Pires (sistema do Tapajós), 10°36'S 55°42'W, Estado do Mato Grosso, Brasil.	Espécie conhecida apenas da localidade-tipo.		Buckup et al 2007	RRT	NAM	-10.6	-55.7	10	36	0	s	55	42	0	4	NAM	OTO	Localidade-tipo	Lucena, CASo (2003b).			Amazonia	34328	Tapajos - Juruena	AMAZONICA	EN	B1a, b i;iii	6	AMA67	0	14	Rio Kaiapo, Bacia do Teles Pires
645	173	Incertae	115	Jupiaba apenina Zanata, 1997	Rio Peixoto de Azevedo, Cachimbo, Estado do Mato Grosso, Brasil.	Bacias dos rios Peixoto de Azevedo e Noedori.	Rio Peixoto Azevedo, Cahimbo, MT	Species link - MZUSP	RR	NAM	-10.2333	-54.9666	0	0	0		0	0	0	4	NAM	OTO	Localidade-tipo				Amazonia	26990.6	Tapajos - Juruena	AMAZONICA	EN	B1a, b i;iii	6	AMA69	0	0	Afluente do Rio Peixoto de Azevedo
646	176	Incertae	115	Jupiaba pirana Zanata, 1997	Igarapé Pimenta, rio Tapajós, Parque Nacional da Amaz6nia, Estado do Pará, Brasil.	Bacia do Tapajós.	Rio Tapajós no PN Amazonia	ARCMAP	RR	OTO	-4.681	-56.5629	4	40	52	s	56	33	47	12	OTO	OTO	Localidade-tipo				Amazonia	40721.8	Tapajos - Juruena	AMAZONICA	VU	D2	6	AMA70	82.1747	85	Rio Tapajos, no PN Amazonia
649	115	Incertae	115	Creagrutus ignotus Vari & Harold, 2001	Riacho 1, afluente do rio Preto na estrada para S╞o Francisco, Municipio de Diamantino (Bacia do rio Arinos), Estado do Mato Grosso, Brasil.	Alto rio Tapajós, Estado do Mato Grosso.	Riacho afl. Rio Preto, bacia rio Arinos, MT	Buckup et al. 2007	RR	NAM	-14.3281	-56.3175	14	19	41	s	56	19	3	14	PAB	PAB: Corrigir para 14 19 41 S 56 19 03 W (leito do rio Preto, junto a Diamantino, MT)	Localidade-tipo	Vari & Harold (2001).			CERRADO	93980.8	Tapajos - Juruena	AMAZONICA	EN	B1a, b i;iii	5	AMA73	0	70	Bacia do Rio Preto, Afluente do Arinos
651	178	Incertae	115	Jupiaba yarina Zanata, 1997	Riacho Monjolinho, rio Arinos, Estado do Mato Grosso, Brasil.	Rio Arinos, bacia do Tapajós.	Riacho Monjolinho, rio Arinos, MT	Species link - MZUSP	RR	NAM	-14.3333	-56.3666	0	0	0		0	0	0	3	OTO	OTO	Localidade-tipo				CERRADO	93980.8	Tapajos - Juruena	AMAZONICA	EN	B1a, b i;iii	5	AMA73	0	70	Bacia do Rio Preto, Afluente do Arinos
8	175	Incertae	115	Jupiaba ocellata (Géry, Planquette & Le Bail, 1996)	Rio Oiapoque, entre Salto Maripa e Camopi.	Bacias do Oiapoque e Paru de Oeste.	Rio Oiapoque, A montante do Camopi, na boca do Mulini	ARCMAP	RR	OTO	3.0833	-52.3214	3	5	2	n	52	19	17	4	NAM	OTO	Localidade-tipo	Zanata (1997).			Amazonia	21893.8	Guianas	AMAZONICA	VU	D2	5	AMA86	99.7571	98	Igarapé Mulini
11	121	Incertae	115	Creagrutus tuyuka Vari & Lima, 2003	Rio Tiquié, comunidade de Cachoeira Comprida, praia a jusante da cachoeira, 00°15'44,0"S 70°01 '05,2"W, Estado do Amazonas, Brasil.	Bacia do Tiquié, tibutário do Uauapés, bacia do Negro, no noroeste da Amazô		Buckup et al 2007	RR	NAM	0.25	-70.0181	0	15	44	n	70	1	5	13	NAM	OTO	Localidade-tipo				Amazonia	23059.7	Rio Negro	AMAZONICA	EN	B1a, b i;iii	6	AMA89	99.9476	92	Rio Tiquié, Cachoeira Comprida
12	182	Incertae	115	Knodus tiquiensis Ferreira & Lima, 2006	Rio Tiquié, aldeia indígena de Caruru, cachoeira do Caruru, 0°16'28,9N 69°54'53,60W, Estado do Amazonas, Brasil.	Drenagem do alto Tiquié (tributário do Uaupés, bacia do alto Negro)		Buckup et al 2007	RR	NAM	0.2667	-69.9149	0	16	29	n	69	54	54	13	NAM	OTO	Localidade-tipo				Amazonia	19719.1	Rio Negro	AMAZONICA	VU	D2	6	AMA90	99.9842	92	Rio Tiquié, Cachoeira Caruru
13	206	Incertae	115	Tucanoichthys tucano Géry & Römer, 1997	Igarapé desembocando no Igarapé Yavuari, um afluente do rio Uaupés, bacia do alto Negro, 0'14'31"N 68'03'48''W, Estado do Amazonas, Brasil.	Bacia do Uaupés.	Afluente do Rio Uaupés, alto Rio Negro, AM	Buckup et al. 2007	RR	NAM	0.2333	-68.0633	0	14	31	n	68	3	48	13	NAM	OTO	Localidade-tipo				Amazonia	257029	Rio Negro	AMAZONICA	VU	D2	5	AMA91	100	100	Igarapé Iauiari
695	162	Incertae	115	Hyphessobrycon schauenseei Fowler, 1926	Rio Inhangapi, Estado do Pará, Brasil.	Espécie conhecida apenas da localidade-tipo.	Rio Inhangapi, PA	USBGN	RRT	NAM	-1.5	-47.9514	1	30	0	s	47	57	5	4	cncor	OTO	Localidade-tipo				Amazonia	29496.8	Amazonas Estuary & Coastal Drainages	ATLANTICO NORDESTE OCIDENTAL	EN	B1a, b i;iii	5	ANOC02	0	0	Igarapé Inhangapi
696	169	Incertae	115	Hyphessobrycon werneri Géry & Uj, 1987	Regi╞o do rio Guamá, igarapé entre Santa Maria do Pará e S╞o Miguel do Guamá, aproximadamente 120 km de Belém, Estado do Pará, Brasil.	Bacia do Guamá.	Nebenflub des rio Guama, Waldbach zwischen Sa.Maria do Pará und S.Miguel de Guama, etwa 120 kilometer von Belem (BR010)	Species link MZUSP	RR	NAM	-1.5	-47.5166	0	0	0		0	0	0	4	NAM	OTO	Localidade-tipo				Amazonia	14387.5	Amazonas Estuary & Coastal Drainages	ATLANTICO NORDESTE OCIDENTAL	EN	B1a, b i;iii	6	ANOC03	0	7	Afluente do Rio Guamá, entre Santa Maria do Pará e São Miguel do Guamá
697	194	Incertae	115	Moenkhausia takasei Géry, 1964	Igarapé próximo à Belém do Pará, bacia do Guamá, baixo Amazonas, Estado do Pará, Brasil.	Bacia do Guamá.		Species link MZUSP	RR	NAM	-1.5	-47.5166	0	0	0		0	0	0	4	NAM	OTO	Localidade-tipo				Amazonia	14387.5	Amazonas Estuary & Coastal Drainages	ATLANTICO NORDESTE OCIDENTAL	EN	B1a, b i;iii	6	ANOC03	0	7	Afluente do Rio Guamá, entre Santa Maria do Pará e São Miguel do Guamá
698	179	Incertae	115	Knodus calliurus Ahl, 1931	Bacia do rio Capim, Pará, Brasil.	Espécie conhecida apenas da localidade-tipo.	rio capim PA	Arcmap	RRT	NAM	-1.7277	-47.7944	1	43	40	s	47	47	40	4	NAM	OTO	Localidade-tipo				Amazonia	84731.3	Amazonas Estuary & Coastal Drainages	ATLANTICO NORDESTE OCIDENTAL	EN	B1a, b i;iii	5	ANOC04	0	11	Rio Capim
555	160	Incertae	115	Hyphessobrycon piabinhas Fowler, 1941	Fortaleza, Brasil.	Espécie conhecida apenas da localidade-tipo.	Fortaleza CE	CIVI IBGE	RRT	NAM	-3.7172	-38.5431	3	43	2	s	38	32	35	7	OTO	OTO	Localidade-tipo,	Géry (1972).			Caatinga	545077	Northeastern Caatinga & Coastal Drainages	ATLANTICO NORDESTE ORIENTAL	VU	B1a, b i;iii	4	ANOR11	5.73739	64	Drenagens costeiras em Fortaleza
238	89	Incertae	115	Astyanax microschemos Bertaco & Lucena, 2006	Córrego Palmital, aproximadamente 20'21'S 41°31'W, bacia do Itapemirim, léna, Estado do Espirito Santo, Brasil.	Espécie conhecida apenas da localidade-tipo.		Buckup et al 2007	RRT	NAM	-20.35	-41.5167	20	21	0	s	41	31	0	8	PAB	PAB	Localidade-tipo				Atlantic forest	8093.63	Northeastern Mata Atlantica	ATLANTICO SUDESTE	CR	B1a, b i;iii	6	ASE03	0	49	Corrego Palmital
610	107	Incertae	115	Bryconamericus tenuis Bizerril & Araéjo, 1992	Rio S╞o Jo╞o, Municipio de Silva Jardim, Estado do Rio de Janeiro, Brasil.	Rio S╞o Jo╞o.	Rio S╞o Jo╞o, Mun. Silva Jardim, RJ	Fuzzy Gazetteer	RR	NAM	-22.565	-42.3636	22	33	54	s	42	21	49	8	PAB	PAB: Corrigir para 22 33 54 S 42 21 49 W (leito do S╞o Jo╞o na BR-101)	Localidade-tipo				Atlantic forest	58494	Fluminense	ATLANTICO SUDESTE	EN	B1a, b i;iii	5	ASE43	98.0138	54	Rio São João, em Silva Jardim
453	127	Incertae	115	Deuterodon longirostris (Steindachner, 1907)	Rio Cubat╞o [sul; ╡guas Mornas], Estado de Santa Catarina, Brasil.	Bacia do Cubat╞o [sul).	Aguas mornas e alto Rio Cubat╞o	Arcmap	RR	NAM	-27.8204	-48.9803	27	49	13	s	48	58	49	1	PAB	PAB	Localidade-tipo	Lucena & Lucena (1992).			Atlantic forest	79009.7	Southeastern Mata Atlantica	ATLANTICO SUL	VU	D2	5	ASU02	35.8931	76	Rio Cubatão, Santa Catarina
752	129	Incertae	115	Deuterodon singularis Lucena & Lucena, 1992	Rio Sanga de Areia, Gravatal, Estado de Santa Catarina, Brasil.	Bacia do Tubar╞o, Estado de Santa Catarina.	Afluente do Tubar╞o em Gravatal, SC	ARCMAP	RR	OTO	-28.3448	-48.9811	28	20	41	s	48	58	52	1	PAB	PAB	Localidade-tipo				Atlantic forest	13353.2	Southeastern Mata Atlantica	ATLANTICO SUL	EN	B1a, b i;iii	6	ASU14	0	12	Afluentes do Tubarão em Gravatal
134	184	Incertae	115	Moenkhausia bonita Benine, Castro & Sabino, 2004	Rio Bala Bonita, Parque Baia Bonita, "╡quario Natural", alto rio Miranda, bacia do rio Paraguai, 21°9'S 56°25'W, Bonito, Estado do Mato Grosso, Brasil.	Espécie conhecida apenas da localidade-tipo.		Buckup et al 2007	RR	NAM	-21.15	-56.4167	21	9	0	s	56	25	0	3	OTO	OTO	Localidade-tipo	Benine el ai. (2004).			CERRADO	136050	Paraguay	PARAGUAI	EN	B1a, b i;iii	6	PRG04	10.6459	62	Bacia do Rio Formoso, Bonito
754	76	Incertae	115	Astyanax biotae Castro & Vari, 2004	Fazenda ╡gua Mole, 22°38'31,7"S 52°48'59,O'W, Municlpio de Diamante do Norte, Estado do Paraná, bacia do Paranapanema, Brasil.	Espécie conhecida apenas da localidade-tipo.		Buckup et al 2007	RRT	NAM	-22.6419	-52.8164	22	38	31	s	52	48	59	1	PAB	PAB	Localidade-tipo				Atlantic forest	49409.2	Laguna dos Patos	ATLANTICO SUL	EN	B1a, b i;iii	6	PRN47	0	2	Ribeirão do Corvo
361	82	Incertae	115	Astyanax gymnogenys Eigenmann, 1911	Porto Uni╞o, rio Iguaçu, Brasil.	Bacia do Iguaçu.	Porto Uni╞o, rio Iguaçu	Buckup et al. 2007	RR	NAM	-25.5833	-49.5	25	35	0	s	49	30	0	2	OTO	OTO	Localidade-tipo		Estado de Conservaç╞o: Vulnerável.	Categoria de ameaça em listas regionais: Vulneráve	Atlantic forest	25246.8	Iguassu	PARANA	EN	B1a, b i;iii	6	PRN52	0.437546	39	Riacho Serrinha
362	133	Incertae	115	Hasemania maxillaris Ellis, 1911	Porto Uni╞o, rio Iguaçu, Brasil.	Bacia do Iguaçu.	Porto Uni╞o, rio Iguaçu	Buckup et al. 2007	RR	NAM	-25.5833	-49.5	25	35	0	s	49	30	0	2	OTO	OTO	Localidade-tipo	Eigenmann (1921).	Estado de Conservaç╞o: Criticamente em perigo.	Categoria de ameaça em listas regionais: Deficient	Atlantic forest	25246.8	Iguassu	PARANA	EN	B1a, b i;iii	6	PRN52	0.437546	39	Riacho Serrinha
363	134	Incertae	115	Hasemania melanura Ellis, 1911	Porto Uni╞o, rio Iguaçu, Brasil.	Bacia do Iguaçu.	Porto Uni╞o, rio Iguaçu	Buckup et al. 2007	RR	NAM	-25.5833	-49.5	25	35	0	s	49	30	0	2	OTO	OTO	Localidade-tipo	Eigenmann (1921).	Estado de Conservaç╞o: Criticamente em perigo.	Categoria de ameaça em listas regionais: Deficient	Atlantic forest	25246.8	Iguassu	PARANA	EN	B1a, b i;iii	6	PRN52	0.437546	39	Riacho Serrinha
365	98	Incertae	115	Astyanax totae Haluch & Abilhoa, 2005	Rio Cascata, tributário do rio Tortuoso, afluente do rio Iguaçu, distrito do Bugre, Município de Balsa Nova, Estado do Paraná, Brasil.	Espécie conhecida apenas da localidade-tipo.	Balsa Nova PR	CIVI IBGE	RRT	NAM	-25.5839	-49.6356	25	35	2	s	49	38	8	2	OTO	OTO	Localidade-tipo				Atlantic forest	6990.7	Iguassu	PARANA	CR	B1a, b i;iii	6	PRN53	0	44	Rio Iguaçu em Balsa Nova
160	136	Incertae	115	Hemigrammus brevis Ellis, 1911	Barreiras, lagoas do rio Grande, Brasil.	Bacia do S╞o Francisco.	bacia grande, prox Barreiras	Arcmap	RR ?	?	-12.1099	-45.2069	12	6	36	s	45	12	25	4	NAM	OTO	Localidade-tipo	Eigenmann (1918).			CERRADO	63431.2	S. Francisco	S├O FRANCISCO	VU	D2	5	SFR13	6.85735	100	Riacho Cabeceira das Lages, Afluente do Rio de Ondas
112	183	Incertae	115	Microschemobrycon elongatus Géry, 1973	Rio Suaizinho, bacia do rio Xingu, 12°49'S 51°46'W, Brasil.	Bacia do alto Xingu.		Buckup et al 2007	RR	NAM	-12.8167	-51.7667	12	49	0	s	51	46	0	4	NAM	OTO	Localidade-tipo				CERRADO	101996	Xingu	TOCANTINS-ARAGUAIA	VU	D2	4	TOAR02	0	100	Rio Suaizinho, Bacia do Xingu
139	144	Incertae	115	Hyphessobrycon eylios Lima & Moreira, 2003	Ribeir╞o do Sapo, km 464,04 da ferrovia Ferronorte, Municlpio de Alto Araguaia, Estado do Mato Grosso, Brasil.	Bacia do alto Araguaia.	Rib do Sapo	Species link MZUSP	RR	NAM	-17.5197	-53.2591	0	0	0		0	0	0	3	OTO	OTO	Localidade-tipo	Lima el ai. (2003).			CERRADO	27053.7	Paraguay	TOCANTINS-ARAGUAIA	EN	B1a, b i;iii	5	TOAR03	84.8597	5	Ribeirão do Sapo
498	87	Incertae	115	Astyanax kullanderi Costa, 1995	Tributário do rio das Mortes, próximo a BR-70, cerca de 10 km a oeste de Primavera do Leste, 15°32'S 54°18'W, Estado de Mato Grosso, Brasil.	Bacia do Araguaia.		Buckup et al 2007	RR	NAM	-15.5333	-54.3	15	32	0	s	54	18	0	3	OTO	OTO	Localidade-tipo				CERRADO	38347.5	Tocantins - Araguaia	TOCANTINS-ARAGUAIA	EN	B1a, b i;iii	4	TOAR20	0	0	Ribeirão dos Perdidos, Rio das Mortes
499	101	Incertae	115	Astyanax unitaeniatus Garutti, 1998	Ribeir╞o Macambira, aproximadamente 14°08'S-46°31'W, junto a ponte na rodovia GO-112, laciara, Estado de Goiás, Brasil.	Rio Paran╞, bacia do Tocantins.	Ribeir╞o Macambira, Iaciara, GO	Buckup et al 2007	RR	NAM	-14.1333	-46.6167	14	8	0	s	46	37	0	5	NAM	OTO	Localidade-tipo				CERRADO	58915.6	Tocantins - Araguaia	TOCANTINS-ARAGUAIA	EN	B1a, b i;iii	6	TOAR21	0	64	Ribeirão Macambira
500	113	Incertae	115	Creagrutus britskii Vari & Harold, 2001	Ribeir╞o Macambira, aproximadamente 14°20'S 46'45'W próximo da ponte na rodovia GO 112, laciara, Estado de Goiás, Brasil.	Bacia do Tocantins, no Estado de Goiás.		Buckup et al 2007	RR	NAM	-14.3333	-46.75	14	20	0	s	46	45	0	5	NAM	OTO	Localidade-tipo	Vari & Harold (2001).			CERRADO	20859.5	Tocantins - Araguaia	TOCANTINS-ARAGUAIA	VU	D2	6	TOAR22	0	100	Ribeirão Macambira/Rio da Prata
501	116	Incertae	115	Creagrutus molinus Vari & Harold, 2001	Riacho afluente do Ribeir╞o Lageadinho, aproximadamente 17°19'S 53°12'W, Municipio de Alto Araguaia, Estado do Mato Grosso, Brasil.	Bacia do alto Araguaia.		Buckup et al 2007	RR	NAM	-17.3167	-53.2	17	19	0	s	53	12	0	3	OTO	OTO	Localidade-tipo	Vari & Harold (2001).			CERRADO	24628.1	Tocantins - Araguaia	TOCANTINS-ARAGUAIA	VU	D2	5	TOAR23	0.0099236	79	Corrego Mosquito
502	151	Incertae	115	Hyphessobrycon langeanii Lima & Moreira, 2003	Córrego Mosquito, km 476,3 da ferrovia Ferronorte, Municipio de Alto Araguaia, Estado do Mato Grosso, Brasil.	Bacia do alto Araguaia.		Species link MZUSP	RR	NAM	-17.4188	-53.2333	0	0	0		0	0	0	3	OTO	OTO	Localidade-tipo	Lima el ai. (2003).			CERRADO	24628.1	Tocantins - Araguaia	TOCANTINS-ARAGUAIA	VU	D2	5	TOAR23	0.0099236	79	Corrego Mosquito
503	168	Incertae	115	Hyphessobrycon weitzmanorum Lima & Moreira, 2003	Córrego Mosquito, km 476,3 da ferrovia Ferronorte, Munícipio de Alto Araguaia, Estado do Mato Grosso, Brasil.	Bacia do alto Araguaia.		Species link MZUSP	RR	NAM	-17.4188	-53.2333	0	0	0		0	0	0	3	OTO	OTO	Localidade-tipo	Lima el ai. (2003).			CERRADO	24628.1	Tocantins - Araguaia	TOCANTINS-ARAGUAIA	VU	D2	5	TOAR23	0.0099236	79	Corrego Mosquito
505	120	Incertae	115	Creagrutus seductus Vari & Harold, 2001	Córrego Fundo, bacia do alto Araguaia, aproximadamente 15°33'S 52°15'W, Município de Barra do Garças, Estado do Mato Grosso, Brasil.	Bacia do alto Araguaia, no Estado do Mato Grosso.		Buckup et al 2007	RR	NAM	-15.55	-52.25	15	33	0	s	52	15	0	3	OTO	OTO	Localidade-tipo	Vari & Harold (2001).			CERRADO	5665.55	Tocantins - Araguaia	TOCANTINS-ARAGUAIA	CR	B1a, b i;iii	5	TOAR25	0	0	Rio Corrente
508	152	Incertae	115	Hyphessobrycon loweae Costa & Géry, 1994	Córrego Xavante, um afiuente do rio Culuene, bacia do Xingu, 40 km ao sul de Paranatinga, 15°01'S 54°03'W, Estado do Mato Grosso, Brasil.	Bacia do alto Xingu.		Buckup et al 2007	RR	NAM	-15.0167	-54.05	15	1	0	s	54	3	0	3	OTO	OTO	Localidade-tipo				CERRADO	97066.2	Tocantins - Araguaia	TOCANTINS-ARAGUAIA	EN	B1a, b i;iii	4	TOAR27	0	17	Corrego Xavante
509	164	Incertae	115	Hyphessobrycon stegemanni Géry, 1961	Municipio de Itacajá, entre os rios Manoel Alves Pequeno e Vermelho, bacia do Tocantins, aproximadamente 8°19'S 47°25'W, Estado do Tocantins, Brasil.	Bacia do Tocantins.		Buckup et al 2007	RR	?	-8.3167	-47.4167	8	19	0	s	47	25	0	4	NAM	OTO	Localidade-tipo	Lima & Géry (2001).			CERRADO	20409.4	Tocantins - Araguaia	TOCANTINS-ARAGUAIA	VU	D2	6	TOAR28	100	100	Alto Manoel Alves Pequeno
511	188	Incertae	115	Moenkhausia loweae Géry, 1992	Rio das Mortes em Xavantina, Brasil.	Bacia do Araguaia.	Stream 56 km north of Xavantina, rio das Mortes basin, iii-iv.1968	Species Link MZUSP 44563	RR	NAM	-15.0333	-52.25	0	0	0		0	0	0	3	OTO	OTO	Localidade-tipo				CERRADO	11274.9	Tocantins - Araguaia	TOCANTINS-ARAGUAIA	EN	B1a, b i;iii	5	TOAR30	0	52	Rio Pindaíba, bacia do Rio das Mortes
512	193	Incertae	115	Moenkhausia pyrophthalma Costa, 1994	Riacho cruzando a estrada entre ╡gua Boa e Cocalinho, 13 km a oeste do ponto onde a estrada alcança o rio das Mortes, bacia do Araguaia-Tocantins, 14'03'S, 51'47'W, Estado do Mato Grosso, Br	Bacia do Araguaia.		Buckup et al 2007	RR	NAM	-14.05	-51.7833	14	3	0	s	51	47	0	3	OTO	OTO	Localidade-tipo				CERRADO	10118.7	Tocantins - Araguaia	TOCANTINS-ARAGUAIA	VU	D2	6	TOAR31	9.80298	100	Afluente margem direita do Rio Boracaia, Bacia do Rio das Mortes
59	400	Loricariinae	136	Rineloricaria heteroptera Isbrücker & Nijssen, 1976	Riacho na Reserva Ducke, Manaus, Estado do Amazonas, Brasil.	Rio Preto da Eva, Estado do Amazonas.	Rio Preto da Eva, AM	Species link - MZUSP	RR	NAM	-2.6567	-59.7279	0	0	0		0	0	0	12	OTO	OTO	Localidade-tipo				Amazonia	6859.42	Amazonas Lowlands	AMAZONICA	VU	D2	5	AMA12	0	89	Rio Preto da Eva
67	410	Loricariinae	136	Rineloricaria teffeana (Steindachner, 1879)	Rio Amazonas (= SolimΣes), Tefé, Estado do Amazonas, Brasil.	Espécie conhecida apenas da localidade-tipo.	Tefé	CIVI IBGE	RRT	NAM	-3.3542	-64.7114	3	21	15	s	64	42	41	13	NAM	OTO	Localidade-tipo				Amazonia	121953	Amazonas Lowlands	AMAZONICA	EN	B1a, b i;iii	5	AMA17	0.00325392	60	Baixo Rio Tefé
68	386	Loricariinae	136	Harttia dissidens Rapp Py-Daniel & Oliveira, 2001	Rio Tapajós, Pimenta I, 4°35'22"S 56°15'16"W, Estado do Pará, Brasil.	Bacia do Tapajós.	Rio Tapajós, Pimentel, PA	Buckup et al. 2007	RR	NAM	-4.5894	-56.2544	4	35	22	s	56	15	16	12	OTO	OTO	Localidade-tipo				Amazonia	13587.5	Amazonas Lowlands	AMAZONICA	VU	D2	5	AMA18	16.8256	81	Margem direita do Rio Tapajós
71	404	Loricariinae	136	Rineloricaria melini (Schindler, 1959)	Rio SolimΣes, próximo de Manacapuru, Estado do Amazonas, Brasil.	Espécie conhecida apenas da localidade-tipo.	Manacapuru	CIVI IBGE	RR	NAM	-3.2997	-60.6206	3	17	59	s	60	37	14	12	OTO	OTO	Localidade-tipo	Isbrücker & Nijssen (1979).			Amazonia	106456	Amazonas Lowlands	AMAZONICA	VU	D2	5	AMA19	6.78192	47	Rio Manacapuru
72	407	Loricariinae	136	Rineloricaria phoxocephala (Eigenmann & Eigenmann, 1889)	Coari, rio SolimΣes, Estado do Amazonas, Brasil.	Espécie conhecida apenas da localidade-tipo.	Coari	CIVI IBGE	RRT	NAM	-4.085	-63.1414	4	5	6	s	63	8	29	12	OTO		Localidade-tipo				Amazonia	49796.9	Amazonas Lowlands	AMAZONICA	VU	D2	5	AMA20	0.747433	47	Rio Coari Grande
73	411	Loricariinae	136	Sturisoma brevirostre (Eigenmann & Eigenmann, 1889)	Rio Içá, afluente do rio SolimΣes, Estado do Amazonas, Brasil.	Espécie conhecida apenas da localidade-tipo.	Rio Içá	?	RRT	NAM	-2.962	-69.0411	0	14	0	n	66	20	0	13	NAM	OTO	Localidade-tipo				Amazonia	295978	Amazonas Lowlands	AMAZONICA	VU	D2	6	AMA21	8.88335	94	Rio Içá
700	399	Loricariinae	136	Rineloricaria hasemani Isbrücker & Nijssen, 1979	Maguari, perto de Belém, Estado do Pará, Brasil.	Espécie conhecida apenas da localidade-tipo.	Belem	CIVI IBGE	RR	NAM	-1.1441	-48.3886	9	34	16	s	36	29	32	6	NAM	OTO	Localidade-tipo				Amazonia	28903	Amazonas Estuary & Coastal Drainages	ATLANTICO NORDESTE OCIDENTAL	EN	B1a, b i;iii	6	ANOC05	0	57	Maguari, região de Belém
806	397	Loricariinae	136	Rineloricaria aequalicuspis Reis & Cardoso, 2001	Rio Três Forquilhas, em frente a igreja da vila Itati, 29°30'43"S 50 05 '31 "W,Terra de Areia, Estado do Rio Grande do Sul, Brasil.	Rio Maquiné, rio Três Forquilhas (nordeste do Estado do Rio Grande do Sul),		Buckup et al 2007	RR	OTO	-29.5119	-50.0919	29	30	43	s	50	5	31	1	PAB	PAB	Localidade-tipo				Atlantic forest	31505.9	Tramandai - Mampituba	ATLANTICO SUL	EN	B1a, b i;iii	6	ASU47	29.0716	46	Rio TrÛs Forquilhas
668	383	Loricariinae	136	Farlowella jauruensis Eigenmann & Vance, 1917	Jaura [= rio Jauru], Estado do Mato Grosso do Sul, Brasil.	Espécie conhecida apenas da localidade-tipo.	Rio Jauru	ARCMAP	RRT	NAM	-16.27	-57.9008	16	16	12	s	57	54	3	3	OTO	OTO	Localidade-tipo	Retzer & Page (1997).			Pantanal	177906	Paraguay	PARAGUAI	VU	D2	5	PRG08	0	63	Foz do Rio Jauru
533	382	Loricariinae	136	Farlowella henriquei Miranda Ribeiro, 1918	Rio Vermelho, afluente do rio Araguaia, Santa Rita das Antas, Estado de Goiás, Brasil.	Bacia do alto Araguaia.	Alto Rio Vermelho, na atual Matrich╞, GO	USBGN	RR	NAM	-15.3854	-50.9576	15	23	7	s	50	57	27	5	NAM	OTO	Localidade-tipo	Retzer & Page (1997).			CERRADO	150682	Tocantins - Araguaia	TOCANTINS-ARAGUAIA	EN	B1a, b i;iii	5	TOAR44	0	100	Rio Vermelho em Matrinchã
250	335	Neoplecostominae	136	Neoplecostomus espiritosantensis Langeani, 1990	Braço sul do rio Jucu, Vitor Hugo, Municipio de Domingos Martins, Estado do Esplrito Santo, Brasil.	Bacias dos rios Jucu e Timbui, no Estado do Espírito Santo.	Rbraço sul do rio Jucu, Vitor Hugo, ES	Species link - MZUSP	RR	NAM	-20.4166	-40.8833	0	0	0		0	0	0	8	PAB	PAB	Localidade-tipo				Atlantic forest	43625.1	Northeastern Mata Atlantica	ATLANTICO SUDESTE	VU	D2	5	ASE06	1.22522	70	Rio Jucu
116	2	Parodontidae	102	Apareiodon machrisi Travassos, 1957	Ribeir╞o Cristalino, Município de Amaro Leite, Estado do Maranh╞o, Brasil.	Bacia do Araguaia-Tocantins.	Afluente do Alto Balsas. Corrigir a Bacia no Catálogo, pois em Amaro Leite, no município de Balsas, todos os afluentes drenam para o Parnaíba. A divisa MA-TO na regi╞o é o divisor de águas. S	Arcmap	RR	NAM	-9.3019	-46.7719	9	18	7	s	46	46	19	4	NAM	OTO	Localidade-tipo	Pavanelli & Britski (2003).			CERRADO	24316.6	Parnaiba	PARNAIBA	VU	D2	6	PNB04	93.49	100	Alto Rio Balsas
257	563	Pimelodidae	139	Conorhynchos glaber Steindachner, 1876	Rio em Porto Seguro, Brasil.	Bacia do Buranhaém, no Estado da Bahia.	Rio Buranhém	USBGN	RR	NAM	-16.45	-39.0667	16	27	0	s	39	4	0	8	PAB	PAB	Localidade-tipo				Atlantic forest	41109.5	Northeastern Mata Atlantica	ATLANTICO LESTE	EN	B1a, b i;iii	6	ALE30	1.15441	43	Rio Buranhém
7	559	Pimelodidae	139	Aguarunichthys inpai Zuanon, Rapp Py-Daniel & Jégu, 1993	Bacia do SolimΣes, norte da ilha Marchantaria, cerca dI;: 15 krn acIma de confluência com a bacia do Negro, Estado do Amazonas, Brasil.	Bacia do SolimΣes.	Bacia do SolimΣes, norte da ilha Marchantaria, cerca dI;: 15 krn acIma de confluência com a bacia do Negro, Estado do Amazonas, Brasil.	Arcmap	RR	OTO	-3.2925	-60.2481	3	17	33	s	60	14	53	12	OTO	OTO	Localidade-tipo				Amazonia	139355	Amazonas Lowlands	AMAZONICA	EN	B1a, b i;iii	4	AMA03	37.2364	36	Boca do Solimões
126	562	Pimelodidae	139	Brachyplatystoma parnahybae Steindachner, 1908	Rio Parnaiba, Brasil.	Bacia do Parnaiba.	Species link MZUSP	Species link MZUSP	RR	NAM	-7.5355	-46.0377	0	0	0		0	0	0	4	NAM	OTO	Localidade-tipo				CERRADO	39359.6	Parnaiba	PARNAIBA	VU	D2	5	PNB08	0	100	Rio das Balsas
242	778	Poeciliidae	251	Phalloptychus eigenmanni Henn, 1916	Rio Catu. Alagoinhas, Estado da Bahia, Brasil.	Espécie conhecida apenas da localidade-tipo.	Rio Catu	USBGN	RRT	NAM	-12.4	-38.3333	12	24	0	s	38	20	0	6	NAM	OTO	Localidade-tipo	Lucinda (2005b).	Estado de Conservaç╞o: Criticamente em perigo.		Atlantic forest	43012.6	Northeastern Mata Atlantica	ATLANTICO LESTE	EN	B1a, b i;iii	5	ALE20	0	3	Rio Catu, Alagoinhas
688	766	Poeciliidae	251	Phalloceros zsp. C		Bacia do Jo╞o de Tiba, no Estado da Bahia.	Rio Jo╞o de Tiba BA	Arcmap	RR	NAM	-16.1669	-39.3519	16	10	1	s	39	21	7	8	PAB	PAB	Lote de referência (UFPB 5370).	Lucinda & Reis (2005).			Atlantic forest	30053	Northeastern Mata Atlantica	ATLANTICO LESTE	EN	B1a, b i;iii	6	ALE45	0	15	Rio João de Tiba
46	762	Poeciliidae	251	Fluviphylax obscurus Costa, 1996	Rio Negro, Barcelos, Estado do Amazonas, Brasil.	Bacia do alto Negro.		Arcmap	RR	OTO	0.9	-62.8978	0	54	30	n	62	53	52	12	OTO	OTO	Localidade-tipo Observaçoes: Originalmente publica				Amazonia	13374.9	Amazonas Guiana Shield	AMAZONICA	VU	D2	5	AMA113	86.4856	100	Igarapé Repartimento
9	763	Poeciliidae	251	Fluviphylax palikur Costa & Le Bail, 1999	Rio Taparabu, afluente da margem direita do rio Oiapoque, 3°58'35"N 51°41'06'W, Juminán, Estado do Amapá, Brasil.	Bacia do baixo Oiapoque.		Buckup et al 2007	RR	OTO	3.9667	-51.685	3	58	35	n	51	41	6	4	NAM	OTO	Localidade-tipo				Amazonia	22981.3	Guianas	AMAZONICA	VU	D2	5	AMA87	73.0976	100	Rio Taparabu
707	764	Poeciliidae	251	Micropoecilia minima (Costa & Sarraf, 1997)	Igarapé da bacia do Guamá, Ourém, Estado do Pará, Brasil.	Espécie conhecida apenas da localidade-tipo.	Rio Guamá PA	Arcmap	RRT	NAM	-1.4643	-48.3841	1	27	52	s	48	23	3	4	NAM	OTO	Localidade-tipo				Amazonia	42818.6	Amazonas Estuary & Coastal Drainages	ATLANTICO NORDESTE OCIDENTAL	EN	B1a, b i;iii	5	ANOC09	14.3343	41	Foz do Rio Guamá
627	768	Poeciliidae	251	Phalloceros zsp. E		Bacias do Macacu e do Itamambuca, nos estados do Rio de Janeiro e S╞o Paulo	Rio Macacu	Arcmap	RRT	NAM	-22.2467	-42.0783	22	14	48	s	42	4	42	8	PAB	PAB: sp é RRD.	Lote de referência (MCP 30408).	Lucinda & Reis (2005).			Atlantic forest	6937.63	Fluminense	ATLANTICO SUDESTE	CR	B1a, b i;iii	6	ASE53	0	31	Afluente do Macacu, Macaé
817	765	Poeciliidae	251	Phalloceros zsp. A		Drenagem do arroio dos Ratos (bacia do Jacui).	Rio Jacuí, Prox a coordenada de Jacui, RS	MCP 30406	RR	NAM	-30.3297	-51.6	30	19	47	s	51	36	0	1	PAB	PAB: Corrigir para 30 21 00 s 51 36 00 w (MCP 30406)	Lote de referência (MCP 30406).	Lucinda & Reis (2005).			Pampas	43478.2	Laguna dos Patos	ATLANTICO SUL	EN	B1a, b i;iii	6	ASU58	0	32	Afluente do Arroio dos Ratos
296	758	Poeciliidae	251	Cnesterodon hypselurus Lucinda & Garavello, 2000	Rio Cilada, abaixo da ponte na rodovia BR 151, bacia do Paranapanema, Jaguariaiva, Estado do Paraná, Brasil.	Bacia do Paranapanema.	Rio Cilada, bacia do rio Paranapanema, Paraná	Buckup et al. 2007	RR	NAM	-24.2911	-49.7483	24	17	28	s	49	44	54	2	OTO	OTO	Localidade-tipo	Lucinda & Garavello (2000), Lucinda (2005a).			CERRADO	29724.8	Upper Parana	PARANA	EN	B1a, b i;iii	6	PRN26	91.2997	69	Bacia do Rio Jaguariaíva
554	761	Poeciliidae	251	Cnesterodon septentrionalis Rosa & Costa, 1993	Alagado próximo à nascente do córrego do Rancho, alto Araguaia, Estado do Mato Grosso, Brasil.	Bacia do alto Araguaia.	Alto Araguaia	ARCMAP	RR	NAM	-17.8981	-53.2006	17	53	53	s	53	12	2	3	OTO	OTO	Localidade-tipo	Lucinda & Garavello (2000), Lucinda (2005a).			CERRADO	23402.4	Tocantins - Araguaia	TOCANTINS-ARAGUAIA	VU	D2	6	TOAR60	64.7097	76	Corrego do Rancho e Ribeirão Guariroba
89	11	Prochilodontidae	103	Prochilodus britskii Castro, 1993	Rio Apiacá (tributário do rio Arinos, bacia do rio Tapajós), N de Juara, a montante do salto, aproximadamente 10036'S 58°04'W, Estado do Mato Grosso, Brasil.	Rio Apiacá, afluente do rio Arinos, afluente do rio Juruena, bacia do rio T	Rio Apiacá N de Jauara, MT	Buckup et al. 2007	RR	NAM	-10.5644	-57.9939	10	33	52	s	57	59	38	14	PAB	PAB: Corrigir logitude para 52 02 25 (para coincidir com o leito do rio)	Localidade-tipo	Castro & Vari (2004).			Amazonia	50477.5	Xingu	TOCANTINS-ARAGUAIA	EN	B1a, b i;iii	5	AMA56	0	79	Rio Apiacá
117	12	Prochilodontidae	103	Prochilodus lacustris Steindachner, 1907	Lago de Parnaguá, Lagoa da Miss╞o, Santa Filomena e rio Medonho, tributário do rio Parnaíba, Estado do Piaui, Brasil.	Bacias do Parnalba e do Mearim, nordeste do Brasil.	Rio Medonho, PI	Arcmap	RR	OTO	-9.0994	-46.1309	9	5	58	s	46	7	51	4	NAM	OTO	Localidade-tipo	Castro & Vari (2004).			CERRADO	34153	Parnaiba	PARNAIBA	VU	D2	5	PNB05	0	100	Rio Medonho, bacia do Parnaíba
256	523	Pseudopimelodidae	137	Microglanis pataxo Sarmento-Soares «et al»., 2006	Córrego Jundlaí na estrada BR-101 para Jucuruçu, 17°01'34"S 39°35'56"W, próximo a Itamaraju, Municlpio de Itamaraju, Estado da Bahia, Brasil.	Bacias dos rios Cahy, Jucuruçu e Peruipe, no Estado da Bahla.		Buckup et al 2007	RR	OTO	-17.0261	-39.5989	17	1	34	s	39	35	56	8	PAB	PAB	Localidade-tipo				Atlantic forest	60906.2	Northeastern Mata Atlantica	ATLANTICO LESTE	EN	B1a, b i;iii	6	ALE29	0	70	Córrego Jundiaí
145	516	Pseudopimelodidae	137	Cephalosilurus fowleri Haseman, 1911	Cidade da Barra, rio S╞o Francisco, Estado da Bahia, Brasil.	Bacia do S╞o Francisco.	Barra, BA	Cent mun	RR	NAM	-11.0214	-43.328	0	0	0		0	0	0	6	NAM	OTO	Localidade-tipo	Britski el ai. (1986).			Caatinga	29346.8	S. Francisco	S├O FRANCISCO	VU	D2	6	SFR01	96.7714	84	Bacia do Rio Grande, em Barra
178	520	Pseudopimelodidae	137	Microglanis leptostriatus Mori & Shibatta, 2006	Rio Verde Grande, 16°39'S 46°11'57,8"W, Montes Claros, Estado de Minas Gerais, Brasil.	Bacia do S╞o Francisco médio-superior.	Rio Verde Grande em Montes Claros. Coord em Buckup et al 2007 errada	Buckup et al 2007	RR	OTO	-16.6792	-43.7072	16	40	45	s	43	42	26	8	PAB	PAB	Localidade-tipo				CERRADO	15509.4	S. Francisco	S├O FRANCISCO	EN	B1a, b i;iii	6	SFR21	0	0	Rio Verde Grande em Montes Claros
3	597	Rhamphichthyidae	147	Rhamphichthys longior Triques, 1999	Lago Paru, formado na confluência dos rios Trombetas e Paru do Oeste, em Oriximiná, Estado do Pará, Brasil.	Lago Paru, em Oriximiná, no Estado do Pará.	Lago Paru	USBGN e ARCMAP	RR	NAM	-1.8806	-55.7381	1	52	50	s	55	44	17	12	OTO	OTO	Localidade-tipo	Triques (1999).			Amazonia	356856	Amazonas Lowlands	AMAZONICA	VU	D2	5	AMA02	21.8482	56	Igarapé Saracá/Araticum
23	595	Rhamphichthyidae	147	Iracema caiana Triques, 1996	Rio Jauaperi, cerca de 40-50 km acima de sua foz no rio Negro, Estado do Amazonas, Brasil.	Rio Jauaperi.	Rio Jauaperi, a cerca de 45 km acima da boca com o Negro	Arcmap	RRT	OTO	-1.1914	-61.5837	1	11	29	s	61	35	1	12	OTO	OTO	Localidade-tipo (MZUSP 8952).	Triques (1996).			Amazonia	30053.2	Rio Negro	AMAZONICA	VU	D2	5	AMA06	23.6479	85	Rio Jauaperi
435	596	Rhamphichthyidae	147	Rhamphichthys atlanticus Triques, 1999	Lago Viana, sistema dos rios Pindaré-Mearim, Estado do Maranh╞o, Brasil.	Lago Via na, sistema dos rios Pindaré-Mearim, no Estado do Maranh╞o.	Rio Pindar'é, em Viana, Bacia do mearim	Arcmap	RRT	OTO	-3.2861	-44.8932	3	17	10	s	44	53	36	4	NAM	OTO	Localidade-tipo	Triques (1999).			Amazonia	113368	Amazonas Estuary & Coastal Drainages	ATLANTICO NORDESTE OCIDENTAL	EN	B1a, b i;iii	5	ANOC01	87.4795	36	Rio Pindaré na região do Lago Viana, Bacia do Mearim
218	639	Rivulidae	250	Cynolebias vazabarrisensis Costa, 2001	Poça temporária 33 km S de Bendeg6. rodovia BR-116. bacia do Vaza-Barris. Estado da Bahia. Brasil.	Bacia do Vaza-Barris. Brasil.		Costa 2001	RR	NAM	-10.25	-39.0833	10	15	0	s	39	5	0	6	NAM	OTO	Localidade-tipo				Caatinga	140053	Northeastern Mata Atlantica	ATLANTICO LESTE	VU	D2	5	ALE06	0.138785	88	Riacho Do Rosario, Bacia do Vaza Barris
220	635	Rivulidae	250	Cynolebias itapicuruensis Costa, 2001	Poça temporária em Capim Grosso. bacia do Itapicuru. Estado da Bahia. Brasil.	Bacia do Itapicuru. Brasil.	Capim Grosso, bacia do rio Itapicuru, Bahia	Arcmap	RR	NAM	-11.2194	-40.0142	11	13	10	s	40	0	51	6	NAM	OTO	Localidade-tipo				Caatinga	32103.2	Northeastern Mata Atlantica	ATLANTICO LESTE	VU	D2	4	ALE08	0.0589887	95	Bacia do Itapicuru
259	683	Rivulidae	250	Prorivulus auriferus Costa, Lima & Suzart «in» Costa, 2004	Riacho costeiro, UTM 24L 0503477 8505050, Valença, Estado da Bahia, Brasil.	Riachos costeiros do Estado da Bahia.	Valença, BA drenagens costeiras	Buckup et al 2007	RR	NAM	-13.2831	-38.9817	13	16	59	s	38	58	54	6	NAM	OTO	Localidade-tipo				Atlantic forest	176272	Northeastern Mata Atlantica	ATLANTICO LESTE	EN	B1a, b i;iii	4	ALE32	41.8999	18	Drenagens costeiras em Valença
260	727	Rivulidae	250	Simpsonichthys izecksohni (da Cruz, 1983)	Reserva Florestal da Companhia Vale do Rio Doce, Município de Unhares, Estado do Espirito Santo, Brasil.	Bacia do baixo Doce e planícies costeiras adjacentes.	Reserva Florestal da Companhia Vale do Rio Doce, Município de Unhares, Estado do Espirito Santo, Brasil.	?	RR	NAM	-19.0654	-39.9969	19	3	55	s	39	59	49	8	PAB	PAB	Localidade-tipo		Estado de Conservaç╞o: Vulnerável.	Categoria de ameaça em listas regionais: Vulneráve	Atlantic forest	27524	Northeastern Mata Atlantica	ATLANTICO LESTE	EN	B1a, b i;iii	6	ALE33	41.276	53	Afluentes da Margem direita do Barra Seca em Sooretama
261	741	Rivulidae	250	Simpsonichthys rosaceus Costa, Nielsen & de Luca, 2001	Poça temporária perto do rio Pardo, estrada entre Potiguará e Itapetinga, Estado da Bahia, Brasil.	Bacia do médio Pardo.	Rio Pardo entre Potiguara e Itapetinga	Arcmap	RR	NAM	-15.3962	-40.0352	15	23	46	s	40	2	7	8	PAB	PAB	Localidade-tipo		Estado de Conservaç╞o: Vulnerável.		Atlantic forest	74968.6	Northeastern Mata Atlantica	ATLANTICO LESTE	EN	B1a, b i;iii	6	ALE34	0	19	Rio Pardo e Ribeirão das Palmeiras
685	713	Rivulidae	250	Simpsonichthys bokermanni (Carvalho & Cruz, 1987)	itabuna, Estado da Bahia, Brasil.	Bacia do Cachoeira, sul do Estado da Bahia.	Rio Cachoeira em Ilheus	Arcmap	RR	NAM	-14.7875	-39.2717	14	47	15	s	39	16	18	8	PAB	PAB	Localidade-tipo	Costa (1995b).	Estado de Conservaç╞o: Vulnerável.		Atlantic forest	42706.1	Northeastern Mata Atlantica	ATLANTICO LESTE	EN	B1a, b i;iii	5	ALE42	0.358997	30	Rio Cachoeira
24	694	Rivulidae	250	Rivulus kirovskyi Costa, 2004	Poças temporárias perto do igarapé Acará, drenagem do baixo Negro, bacia do Amazonas, Reserva Ducke, Manaus, Estado do Amazonas, Brasil.	Drenagem do baixo Negro, bacia do Amazonas, Brasil.	Interior da Reserva Adolfo Duke	Arcma e Google earth	RR	PAB	-2.9559	-59.9667	2	57	21	s	59	58	0	12	OTO	OTO	Localidade-tipo				Amazonia	21796.8	Rio Negro	AMAZONICA	EN	B1a, b i;iii	6	AMA07	8.965e-06	30	Boca do Igarapé Tarumã-açu (afluente margem esquerda)
45	663	Rivulidae	250	Moema portugali Costa, 1989	Ilha de Maracá, Estado de Roraima, Brasil.	Rio Branco, bacia do rio Negro.	Ilha de Maracá RR	ARCMAP	RR	OTO	3.4333	-61.6702	3	26	23	n	61	40	13	12	OTO	OTO	Localidade-tipo	Costa (1992).			Amazonia	104691	Amazonas Guiana Shield	AMAZONICA	VU	D2	6	AMA112	42.6346	92	Furo Santa Rosa, em Maracá
82	609	Rivulidae	250	Aphyolebias boticarioi Costa, 2004	Poça temporária em floresta na planície de inundaç╞o do rio Acre, drenagem do Purus, bacia do Amazonas, 9°35'14,8"S 67°31'57,0"W, elev. 133 m, Porto Acre, Estado do Acre, Brasil.	Panicie de inundaç╞o do rio Acre (bacia do Purus).		Buckup et al 2007	RR	NAM	-9.5874	-67.5325	9	35	15	s	67	31	57	14	PAB	PAB	Localidade-tipo				Amazonia	65033	Amazonas Lowlands	AMAZONICA	VU	D2	6	AMA27	0	80	Rio Acre
81	658	Rivulidae	250	Moema apurinan Costa, 2004	Poça temporária em floresta na planicie de inundaç╞o do rio Acre, drenagem do Purus, bacia do Amazonas, 9'35'12,2"S 67'31'50,6"W, elev. 132 m, Porto Acre, Estado do Acre, Brasil.	Panicie de inundaç╞o do rio Acre (bacia do Purus).		Buckup et al 2007	RR	OTO	-9.5867	-67.5307	9	35	12	s	67	31	51	14	PAB	PAB	Localidade-tipo				Amazonia	65033	Amazonas Lowlands	AMAZONICA	VU	D2	6	AMA27	0	80	Rio Acre
106	687	Rivulidae	250	Rivulus cyanopterus Costa, 2005	Banhado próximo ao rio Tenente Amaral, tributário do alto rio S╞o Lourenço, bacia do Paraguai, 11°58'48,9"S 54°57'20,0'W, Municipio de Jaciara, Estado de Mato Grosso, Brasil.	Espécie conhecida apenas da localidade-tipo.		Buckup et al 2007	RRT	NAM	-11.9803	-54.9556	11	58	49	s	54	57	20	4	NAM	PAB	Localidade-tipo				Amazonia	41156.4	Xingu	AMAZONICA	VU	D2	5	AMA41	0	94	Ribeirão Capricho
632	661	Rivulidae	250	Moema pepotei Costa, 1992	Forte Principe da Beira, Estado de Rondônia, Brasil.	Bacia do Madeira.	Forte Principe da Beira	USBGN	RR	OTO	-12.4167	-64.4167	12	25	0	s	64	25	0	14	PAB	PAB	Localidade-tipo				Amazonia	75181.6	Guapore - Itenez	AMAZONICA	EN	B1a, b i;iii	4	AMA61	6.81393	94	Rio Guaporé, em Forte Príncipe da Beira
633	667	Rivulidae	250	Neofundulus guaporensis Costa, 1988	Forte Prlncipe da Beira, Estado de Rondônia, Brasil.	Bacia do Guaporé.	Forte Principe da Beira	USBGN	RR	NAM	-12.4167	-64.4167	12	25	0	s	64	25	0	14	PAB	PAB	Localidade-tipo				Amazonia	75181.6	Guapore - Itenez	AMAZONICA	EN	B1a, b i;iii	4	AMA61	6.81393	94	Rio Guaporé, em Forte Príncipe da Beira
634	753	Rivulidae	250	Trigonectes macrophthalmus Costa, 1990	Forte Principe da Beira, Estado de Rondônia, Brasil.	Bacia do Guaporé.	Forte Principe da Beira	USBGN	RR	OTO	-12.4167	-64.4167	12	25	0	s	64	25	0	14	PAB	PAB	Localidade-tipo				Amazonia	75181.6	Guapore - Itenez	AMAZONICA	EN	B1a, b i;iii	4	AMA61	6.81393	94	Rio Guaporé, em Forte Príncipe da Beira
742	664	Rivulidae	250	Moema staecki (Seegers, 1987)	Proximidades do lago Janauacá, Estado do Amazonas, Brasil.	Bacia do baixo Negro.	Lago Janauacá	USBGN	RR	NAM	-3.4667	-60.2833	3	28	0	s	60	17	0	12	OTO	OTO	Localidade-tipo	Costa (1992).			Amazonia	36128.1	Amazonas Lowlands	AMAZONICA	EN	B1a, b i;iii	5	AMA84	0	17	Lago Janauacá
15	685	Rivulidae	250	Rivulus amanapira Costa, 2004	Poças perto do igarapé Palestina, S╞o Gabriel da Cachoeira, Estado do Amazonas, Brasil.	Drenagem do alto rio Negro, bacia do Amazonas, Brasil.	S╞o Gabriel da Cachoeira	Buckup et al 2007	RR	OTO	-0.0833	-67	0	5	0	s	67	0	0	13	NAM	OTO	Localidade-tipo				Amazonia	39115.7	Rio Negro	AMAZONICA	VU	D2	5	AMA92	28.0291	64	Rio Negro em São Gabriel da Cachoeira
25	704	Rivulidae	250	Rivulus uakti Costa, 2004	Riacho perto do igarapé lá, drenagem do alto Negro, bacia do Amazonas, S╞o Gabriel da Cachoeira, Estado do Amazonas, Brasil.	Bacia do alto Negro.		Arcmap	RR	NAM	0.5333	-67.4622	0	32	2	n	67	27	44	13	NAM	OTO	Localidade-tipo				Amazonia	106284	Rio Negro	AMAZONICA	VU	D2	6	AMA97	100	99	Rio Cubaté, afluente do Rio Negro
705	645	Rivulidae	250	Kryptolebias campelloi (Costa, 1990)	Primavera. Estado do Pará. Brasil.	Baixo Amazonas.	Cabeceira de dreenagem costeira em Primavera, PA	ARCMAP	RR	OTO	-0.9809	-47.109	0	58	51	s	47	6	32	4	NAM	OTO	Localidade-tipo				Amazonia	28434.2	Amazonas Estuary & Coastal Drainages	ATLANTICO NORDESTE OCIDENTAL	EN	B1a, b i;iii	5	ANOC10	0	45	Drenagens costeiras em Primavera, PA
706	662	Rivulidae	250	Moema piriana Costa, 1989	Primavera, Estado do Pará, Brasil.	Baixo Amazonas.	Cabeceira de dreenagem costeira em Primavera, PA	ARCMAP	RR	OTO	-0.9809	-47.109	0	58	51	s	47	6	32	4	NAM	OTO	Localidade-tipo	Costa (1992).			Amazonia	28434.2	Amazonas Estuary & Coastal Drainages	ATLANTICO NORDESTE OCIDENTAL	EN	B1a, b i;iii	5	ANOC10	0	45	Drenagens costeiras em Primavera, PA
570	637	Rivulidae	250	Cynolebias microphthalmus Costa & Brasil, 1995	Mossoró. Estado do Rio Grande do Norte. Brasil.	Bacia do Jaguaribe e bacias adjacentes.	Conhecida apenas de 2 localidades	Costa 2001	RR	NAM	-5.25	-37.3333	5	15	0	s	37	20	0	7	OTO	OTO	Localidade-tipo	Costa (2001).			Caatinga	8943.74	Northeastern Caatinga & Coastal Drainages	ATLANTICO NORDESTE ORIENTAL	VU	D2	6	ANOR06	0	73	Medio Rio do Carmo
571	710	Rivulidae	250	Simpsonichthys antenori (Tulipano, 1973)	Estado do Ceará, Brasil.	Bacia do Jaguaribe e bacias adjacentes.	2,5km de Limoeiro do norte	Costa 2003	RR	NAM	-5.1667	-38.0833	5	10	0	s	38	5	0	7	OTO	OTO	Localidade-tipo	Costa (1995b).			Caatinga	115575	Northeastern Caatinga & Coastal Drainages	ATLANTICO NORDESTE ORIENTAL	VU	D2	5	ANOR07	0	72	Rio Jaguaribe, em Limoeiro do Norte
620	647	Rivulidae	250	Leptolebias citrinipinnis (Costa, Lacerda & Tanizaki, 1988)	Maricá, Estado do Rio de Janeiro, Brasil.	Sistema lagunar de Maricá, no Estado do Rio de Janeiro.	Maricá.	Species Links MZUSP 38435	RR	NAM	-22.9083	-42.8361	22	54	30	s	42	50	10	8	PAB	PAB: corrigir para 22 54 30 s 42 50 10w (Maricá)	Localidade-tipo		Estado de Conservaç╞o: Em perigo.	Categoria de ameaça em listas regionais: Em perigo	Atlantic forest	30934.4	Fluminense	ATLANTICO SUDESTE	EN	B1a, b i;iii	6	ASE48	4.7753	32	Drenagens e lagoas costeiras em Maricá
621	665	Rivulidae	250	Nematolebias papilliferus Costa, 2002	Poça temporária junto a um pequeno riacho do sistema laguna r de Maricá, Ino╞, Estado do Rio de Janeiro, Brasil.	Sistemas lagunares de Maricá e Saquarema, no Estado do Rio de Janeiro.		Costa 2002	RR	NAM	-22.9207	-42.9282	22	55	15	s	42	55	41	8	PAB	PAB	Localidade-tipo				Atlantic forest	30934.4	Fluminense	ATLANTICO SUDESTE	EN	B1a, b i;iii	6	ASE48	4.7753	32	Drenagens e lagoas costeiras em Maricá
622	648	Rivulidae	250	Leptolebias cruzi (Costa, 1988)	Barra de S╞o Jo╞o, Rio de Janeiro, Brasil.	Baixadas costeiras junto a foz do rio S╞o Jo╞o, no Estado do Rio de Janeiro	Afluente do Sao Jo╞o, prox Foz	Arcmap	RR	NAM	-22.6144	-42.0681	22	36	52	s	42	4	5	8	PAB	PAB	Localidade-tipo		Estado de Conservaç╞o: Criticamente em perigo.	Categoria de ameaça em listas regionais: Criticame	Atlantic forest	15871.9	Fluminense	ATLANTICO SUDESTE	EN	B1a, b i;iii	5	ASE49	28.474	10	Foz do Rio São João
623	716	Rivulidae	250	Simpsonichthys constanciae (Myers, 1942)	Cabo Frio, Rio de Janeiro, Brasil.	Bacias costeiras do Rio de Janeiro.	Afluente do Sao Jo╞o, prox Foz	Arcmap	RR	NAM	-22.6144	-42.0681	22	36	52	s	42	4	5	8	PAB	PAB	Localidade-tipo		Estado de Conservaç╞o: Criticamente em perigo.	Categoria de ameaça em listas regionais: Criticame	Atlantic forest	15871.9	Fluminense	ATLANTICO SUDESTE	EN	B1a, b i;iii	5	ASE49	28.474	10	Foz do Rio São João
624	649	Rivulidae	250	Leptolebias fractifasciatus (Costa, 1988)	Ino╞, Rio de Janeiro, Brasil.	Sistema lagunar de Maricá, no Estado do Rio de Janeiro.	Maricá.	Species Links MZUSP (sem vouc	RR	NAM	-22.8333	-42.9333	22	56	5	s	42	54	52	8	PAB	PAB: Corrigir para 22 56 05 s 22 54 52 w (proximidade de Ino╞, no sistema de Maricá)	Localidade-tipo		Estado de Conservaç╞o: Criticamente em perigo.	Categoria de ameaça em listas regionais: Vulneráve	Atlantic forest	23121.9	Fluminense	ATLANTICO SUDESTE	EN	B1a, b i;iii	6	ASE50	2.53867	15	Drenagem Afluente do Itaboraí, em São Gonçalo e Maricá
625	666	Rivulidae	250	Nematolebias whitei (Myers, 1942)	Cabo Frio, Rio de Janeiro, Brasil.	Bacias costeiras do Rio de Janeiro.	Cabo Frio	Costa 2002	RR	NAM	-22.75	-42	22	45	0	s	42	0	0	8	PAB	PAB	Localidade-tipo	Costa (2002d).	Estado de Conservaç╞o: Criticamente em perigo.	Categoria de ameaça em listas regionais: Em perigo	Atlantic forest	7796.78	Fluminense	ATLANTICO SUDESTE	CR	B1a, b i;iii	6	ASE51	0.00715447	27	Bacias costeiras em Cabo Frio
626	692	Rivulidae	250	Rivulus janeiroensis Costa, 1991	Silva Jardim, Estado do Rio de Janeiro, Brasil.	Bacias costeiras do Rio de Janeiro.	Drenagem proxima a cidade de Silva Jardim RJ	Arcmap	RR	OTO	-22.6593	-42.4562	22	39	34	s	42	27	22	8	PAB	PAB	Localidade-tipo			Categoria de ameaça em listas regionais: Em perigo	Atlantic forest	22043.6	Fluminense	ATLANTICO SUDESTE	EN	B1a, b i;iii	5	ASE52	90.7936	21	Bacias costeiras em Silva Jardim
329	612	Rivulidae	250	Austrolebias charrua Costa & Cheffe, 2001	Poça temporária junto ao arroio Chuí, estrada para Barra do Chui, Estado do Rio Grande do Sul, Brasil.	Bacia do sul da lagoa Mirirm (sistema da laguna dos Patos).	Arroio Chui	USBGN	RR	NAM	-33.6333	-53.3839	33	38	0	s	53	23	2	1	PAB	PAB: Corrigir para 22 43 7 s 53 24 00 w	Localidade-tipo	Costa (2006a).	Estado de Conservaç╞o: Em perigo.	Categoria de ameaça em listas regionais: Vulneráve	Atlantic forest	181025	Upper Parana	PARANA	EN	B1a, b i;iii	4	ASU15	34.6518	0	Arroio Chui
780	613	Rivulidae	250	Austrolebias cyaneus (Amato, 1987)	Arroio Dom Marcos, Rio Pardo, Estado do Rio Grande do Sul, Brasil.	Bacia do baixo Jacui, no sistema da laguna dos Patos.	Arroi dom marcos	Arcmap	RR	NAM	-30.1908	-52.5411	30	11	27	s	52	32	28	1	PAB	PAB	Localidade-tipo	Costa (2002c), Costa (2006a).	Estado de Conservaç╞o: Em perigo.	Categoria de ameaça em listas regionais: Vulneráve	Pampas	97687.4	Laguna dos Patos	ATLANTICO SUL	EN	B1a, b i;iii	5	ASU33	0	30	Arroio Dom Marcos
781	615	Rivulidae	250	Austrolebias jaegari Costa & Cheffe, 2002	Banhado do Timba, Corredor das Tropas, aproximadamente 31°30'S 52°20'W, Pelotas, Estado do Rio Grande do Sul, Brasil.	Bacias associadas a margem esquerda da laguna dos Patos.		Buckup et al 2007	RR	NAM	-31.5	-52.3333	31	30	0	s	52	20	0	1	PAB	PAB	Localidade-tipo	Costa (2006a).			Pampas	33700.2	Laguna dos Patos	ATLANTICO SUL	EN	B1a, b i;iii	4	ASU34	0	19	Banhado do Timba
782	621	Rivulidae	250	Austrolebias nigrofasciatus Costa & Cheffe, 2001	Poça temporária em Pontai da Barra, praia de Laranjal, Pelotas, Estado do Rio Grande do Sul, Brasil.	Bacias dos rios associados com a margem esquerda do canal de S╞o Gonçalo (s	proximo a PelotasRS	Arcmap	RR	NAM	-31.7589	-52.235	31	45	32	s	52	14	6	1	PAB	PAB: Aperfeiçoar para 31 46 00 s 52 12 39 w	Localidade-tipo	Costa (2006a).	Estado de Conservaç╞o: Em perigo.	Categoria de ameaça em listas regionais: Em perigo	Pampas	69979.4	Laguna dos Patos	ATLANTICO SUL	EN	B1a, b i;iii	4	ASU34	0	19	Banhado do Timba
783	616	Rivulidae	250	Austrolebias juanlangi Costa, 2006	Charco temporário próximo ao banhado do Minuano, estrada BR-153, bacia do Jaguar╞o Chico, rio Jaguar╞o basin, sistema da laguna dos Patos, 31°40'48"S 54°8'45"W, Jaguar╞o, Estado do Rio Grand	Bacias do Jaguar╞o e doTaquari (sistema da laguna dos Patos); bacia do alto		Buckup et al 2007	RR	NAM	-31.68	-54.1458	31	40	48	s	54	8	45	1	PAB	PAB	Localidade-tipo	Costa (2002c), Costa (2006a).	Estado de Conservaç╞o: Vulnerável.	Categoria de ameaça em listas regionais: Vulneráve	Pampas	17630.9	Laguna dos Patos	ATLANTICO SUL	EN	B1a, b i;iii	6	ASU35	0	45	Afluente do Alto Arroio Minuano
785	619	Rivulidae	250	Austrolebias minuano Costa & Cheffe, 2001	Lagoa temporária cerca de 4,5 km N de Quinta, Estado do Rio Grande do Sul, Brasil.	Planícia de inundaç╞o do sul da laguna dos Patos e planícies adjacentes.	Quinta RS	CIVI IBGE	RR	NAM	-32.0717	-52.2597	32	4	18	s	52	15	35	1	PAB	PAB	Localidade-tipo	Costa (2006a).	Estado de Conservaç╞o: Em perigo.	Categoria de ameaça em listas regionais: Em perigo	Pampas	167984	Laguna dos Patos	ATLANTICO SUL	VU	D2	4	ASU37	34.7998	74	Planicies de inundação ao Sul da Lagoa dos Patos
786	642	Rivulidae	250	Cynopoecilus melanotaenia (Regan, 1912)	Quinta. Estado do Rio Grande do Sul. Brasil.	Bacias costeiras do sul do Brasil e Uruguai.	Quinta RS	CIVI IBGE	RR	NAM	-32.0717	-52.2597	32	4	18	s	52	15	35	1	PAB	PAB	Localidade-tipo	Costa (2002a).			Pampas	167984	Laguna dos Patos	ATLANTICO SUL	VU	D2	4	ASU37	34.7998	74	Planicies de inundação ao Sul da Lagoa dos Patos
787	620	Rivulidae	250	Austrolebias nachtigalli Costa & Cheffe «in» Costa, 2006	Arroio Grande, estrada BR-116, aproximadamente 32°15'S 53°5'W, Estado do Rio Grande do Sul, Brasil.	Bacias dos rios associados com a margem interna da lagoa Mirim (sistema da		Buckup et al 2007	RR	NAM	-32.25	-53.0833	32	15	0	s	53	5	0	1	PAB	PAB	Localidade-tipo				Pampas	25537.6	Laguna dos Patos	ATLANTICO SUL	VU	D2	6	ASU38	0	87	Alto Arroio Grande, Afluente da Lagoa Mirim
788	623	Rivulidae	250	Austrolebias univentripinnis Costa & Cheffe, 2006	Charco temporário aproximadamente 200 m do rio Jaguar╞o drainage, sistema da laguna dos Patos, UTM 22H 0268740 6402377, Jaguar╞o, Estado do Rio Grande do Sul, Brasil.	Bacia do Jaguar╞o (sistema da laguna dos Patos).	Rio Jaguar╞o em Jaguar╞o, RS	Arcmap	RR	NAM	-32.6078	-53.2381	32	36	28	s	53	14	17	1	PAB	PAB	Localidade-tipo	Costa (2006a).			Pampas	17471.8	Laguna dos Patos	ATLANTICO SUL	EN	B1a, b i;iii	6	ASU39	0	13	Rio Jaguarão
789	640	Rivulidae	250	Cynopoecilus fulgens Costa, 2002	Poça temporária 5 km ao norte de S╞o José do Norte. Estado do Rio Grande do Sul. Brasil.	Bacia da laguna dos Patos.		Costa 2002	RR	NAM	-32	-52	32	0	0	s	52	0	0	1	PAB	PAB	Localidade-tipo				Pampas	253008	Laguna dos Patos	ATLANTICO SUL	EN	B1a, b i;iii	6	ASU40	11.7344	54	Drenagens Costeiras a sudeste da Lagoa dos Patos
790	641	Rivulidae	250	Cynopoecilus intimus Costa, 2002	Alagado temporário junto a um riacho afiuente do rio Vacacai. bacia do Jacui. 6 km NO de Vila Block. Estado do Rio Grande do Sul. Brasil.	Bacia da laguna dos Patos.		Costa 2002	RR	NAM	-29.9167	-53.8333	29	55	0	s	53	50	0	1	PAB	PAB	Localidade-tipo				Pampas	17912.5	Laguna dos Patos	ATLANTICO SUL	EN	B1a, b i;iii	6	ASU41	0	22	Sanga da Areia
809	625	Rivulidae	250	Campellolebias brucei Vaz-Ferreira & Sierra, 1974	Poça temporária entre Criciéma e Tubar╞o, [BR-1 01, próximo a estrada de Rinc╞o, aproximadamente 28°45'S 49°15'W];], Estado de Santa Catarina, Brasil.	Espécie conhecida apenas da localdiade-tipo.		Buckup et al 2007	RRT	NAM, PAB	-28.75	-49.25	28	45	0	s	49	15	0	1	PAB	PAB	Localidade-tipo	Costa (1995c).	Estado de Conservaç╞o: Criticamente em perigo.		Atlantic forest	18812.5	Tramandai - Mampituba	ATLANTICO SUL	EN	B1a, b i;iii	6	ASU50	0	5	Poças Temporárias em drenagens entre Crici·ma e Tubarão
115	674	Rivulidae	250	Pituna schindleri Costa, 2007	Drenagem do Corrente, bacia do Paranaíba, aproximadamente 4°30?S, 42°00?W, 26 km NW de Campo Maior, Estado do Piauí, Brasil.	Poças temporárias na bacia do baixo Paranaíba.	Localidade-tipo	Costa et al 2007	RR	PAB	-4.3814	-42.0067	4	22	53	s	42	0	24	7	OTO	PAB	Localidade-tipo				Caatinga	117212	Parnaiba	PARNAIBA	EN	B1a, b i;iii	5	PNB03	32.0328	0	Rio Corrente, PI
138	669	Rivulidae	250	Neofundulus parvipinnis Costa, 1988	BR-364,36 km L de Cuiabá, Estado do Mato Grosso, Brasil.	Bacia do Paraguai.	36 km l de Cuiaba, Bacia do Ribeir╞o Formoso, Alto Paraguai	ARCMAP	RR	OTO	-15.6308	-55.7192	15	37	51	s	55	43	9	3	OTO	OTO	Localidade-tipo				CERRADO	83834.6	Paraguay	PARAGUAI	VU	D2	6	PRG10	85.4017	63	Ribeirão Formoso
144	751	Rivulidae	250	Stenolebias damascenoi (Costa, 1991)	Estrada entre Poconé e Porto Cercado, Estado do Mato Grosso, Brasil.	Bacia do Paraguai.	Rio bento Gomes x Rodovia	Arcmap	RR	OTO	-16.4516	-56.6771	16	27	6	s	56	40	38	3	OTO	OTO	Localidade-tipo		Estado de Conservaç╞o: Deficiente de dados.		Pantanal	107534	Paraguay	PARAGUAI	VU	D2	6	PRG11	1.9708	86	Ribeirão Bento Gomes
667	752	Rivulidae	250	Trigonectes balzanii (Perugia, 1891)	Villa Maria (Cáceres), Estado do Mato Grosso, Brasil.	Bacia do Paraguai.	5km ao N de Cáceres, no Rio Paraguai	ARCMAP	RR	OTO	-16.0272	-57.6721	16	1	38	s	57	40	20	3	OTO	OTO	Localidade-tipo	Costa (1990b).			Pantanal	26178.1	Paraguay	PARAGUAI	EN	B1a, b i;iii	5	PRG18	0	50	Rio Paraguai em Cáceres
670	659	Rivulidae	250	Moema heterostigma Costa, 2003	Alagado temporário na várzea do rio Cuiabá, bacia do Paraguai, Porto Cercado, Reserva Particular do Patrimônio Natural SESC-Pantanal, Estado de Mato Grosso, Brasil.	Bacia do Paraguai, Brasil	SESC Pantanal em Bar╞o de Melgaço, MT	George CI CG	RR	OTO	-17.03	-56.59	0	0	0		0	0	0	3	OTO	OTO	Localidade-tipo				Pantanal	57331.3	Paraguay	PARAGUAI	VU	D2	5	PRG21	36.2924	76	Rio Cuiabá em Baraão de Melgaço
291	700	Rivulidae	250	Rivulus rossoi Costa, 2005	Riacho na BR-060, 21,5 km a sudoeste de Campo Grande, drenadem do rio Inhadul, bacia do Paraná, aproximadamente 20°40'S 54°40'W, Municipio de Campo Grande, Estado de Mato Grosso do Sul, Bras	Espécie conhecida apenas da localidade-tipo.		Buckup et al 2007	RRT	NAM	-20.6667	-54.6667	20	40	0	s	54	40	0	3	OTO	OTO	Localidade-tipo				CERRADO	132764	Upper Parana	PARANA	EN	B1a, b i;iii	6	PRN21	3.50252	0	Rio Inhanduí
148	629	Rivulidae	250	Cynolebias albipunctatus Costa & Brasil, 1991	Juazeiro. Estado da Bahia, Brasil.	Bacia do S╞o Francisco.	70 km nw de Uauá, parátipos em Costa 2001	Costa 2001	RR	NAM	-9.5	-40.25	9	30	0	s	40	15	0	6	NAM	OTO	Localidade-tipo	Costa & Brasil (1991).			Caatinga	436606	S. Francisco	S├O FRANCISCO	EN	B1a, b i;iii	5	SFR04	0	53	Riacho do Poção
149	636	Rivulidae	250	Cynolebias leptocephalus Costa & Brasil, 1993	Guanambi, Estado da Bahia, Brasil.	Bacia do S╞o Francisco.		Costa 2001	RR	NAM	-14.25	-42.75	14	15	0	s	42	45	0	8	PAB	PAB	Localidade-tipo	Costa (2001).			Caatinga	65154.6	S. Francisco	S├O FRANCISCO	VU	D2	5	SFR05	0	76	Alto Rio das Rãs
151	722	Rivulidae	250	Simpsonichthys fulminantis (Costa & Brasil, 1993)	Guanambí, Estado da Bahia, Brasil.	Bacia do S╞o Francisco.	Alto Rio das R╞s, Guanambi	Arcmap	RR	NAM	-14.2642	-42.6839	14	15	51	s	42	41	2	8	PAB		Localidade-tipo		Estado de Conservaç╞o: Vulnerável.		Caatinga	65154.6	S. Francisco	S├O FRANCISCO	VU	D2	5	SFR05	0	76	Alto Rio das Rãs
150	723	Rivulidae	250	Simpsonichthys ghisolfi Costa, Cyrino & Nielsen, 1996	Guanambi, Estado da Bahia, Brasil.	Rio das R╞s, bacia do S╞o Francisco.	Alto Rio das R╞s, Guanambi	Arcmap	RR	NAM	-14.2543	-42.7821	14	15	16	s	42	46	56	8	PAB	Corrigir para 14 15 15.6 s 42 46 55.6 w (localidade tipo)	Localidade-tipo		Estado de Conservaç╞o: Vulnerável.		Caatinga	65154.6	S. Francisco	S├O FRANCISCO	VU	D2	5	SFR05	0	76	Alto Rio das Rãs
153	721	Rivulidae	250	Simpsonichthys flavicaudatus (Costa & Brasil, 1990)	Lagoa Grande, Estado do Pernambuco, Brasil.	Bacia do S╞o Francisco.	Rio S╞p Francisco em lagoa Grande PE	Arcmap	RR	OTO	-9.0689	-40.1929	9	4	8	s	40	11	35	6	NAM		Localidade-tipo				Caatinga	120847	S. Francisco	S├O FRANCISCO	VU	D2	5	SFR07	0	77	Rio São Francisco e afluentes, em Lagoa Grande
155	729	Rivulidae	250	Simpsonichthys macaubensis Costa, 2006	Poça temporária próximo a Macaébas, drenagem do Paramirim, bacia do S╞o Francisco, aproximadamente 13°00'S 42°30'W, eiev. 680 m, Estado da Bahia, Brasil.	Espécies conhecida apenas da localidade-tipo.		Buckup et al 2007	RRT	NAM	-13	-42.5	13	0	0	s	42	30	0	6	NAM	OTO	Localidade-tipo				Caatinga	100575	S. Francisco	S├O FRANCISCO	EN	B1a, b i;iii	6	SFR09	0	22	Bacia do Riacho Sapecado, Afluente do Parnamirim
157	732	Rivulidae	250	Simpsonichthys mediopapillatus Costa, 2006	Poça temporária 8 km ao sul de Pindai, drenagem do S╞o Domingos, tribo do rio Verde Pequeno, tribo do rio Verde Grande, bacia do S╞o Francisco, 14°33'36,7"S 42°42'09,8"W, elev. 628 m, Estado	Drenagem do S╞o Domingos (bacia do S╞o Francisco).		Buckup et al 2007	RR	NAM	-14.5602	-42.7027	14	33	37	s	42	42	10	8	PAB	PAB	Localidade-tipo				Caatinga	58248.4	S. Francisco	S├O FRANCISCO	EN	B1a, b i;iii	5	SFR11	0	24	Bacia do São Domingos, afluente do Rio Verde Pequeno
180	630	Rivulidae	250	Cynolebias altus Costa, 2001	25 km S de Ibotirama. bacia do S╞o Francisco. Estado da Bahia. Brasil.	Bacia do médio S╞o Francisco. Brasil.	25km S de Ibotirama	Costa 2001	RR	NAM	-12.5	-43.1667	12	30	0	s	43	10	0	6	NAM	OTO	Localidade-tipo				CERRADO	26818.6	S. Francisco	S├O FRANCISCO	VU	D2	6	SFR23	0	57	Riacho do PAulista e Rio São Francisco em Paratinga
182	631	Rivulidae	250	Cynolebias attenuatus Costa, 2001	Poça temporária a 12 km a oeste de Bom Jesus da Lapa. Estado da Bahia. Brasil.	Bacia do médio S╞o Francisco.		Costa 2001	RR	NAM	-13.25	-43.6667	13	15	0	s	43	40	0	6	NAM	OTO	Localidade-tipo				CERRADO	42362.4	S. Francisco	S├O FRANCISCO	EN	B1a, b i;iii	5	SFR24	0	16	Rio São Francisco e afluente da margem esquerda em Bom Jesus da Lapa
181	719	Rivulidae	250	Simpsonichthys flagellatus Costa, 2003	Poça temporária a 12 km a oeste de Bom Jesus da Lapa, Estado da Bahia, Brasil.	Bacia do médio S╞o Francisco, Brasil.		?	RR	OTO	-13.2269	-43.5374	13	13	37	s	43	32	15	6	NAM	OTO	Localidade-tipo				CERRADO	42362.4	S. Francisco	S├O FRANCISCO	EN	B1a, b i;iii	5	SFR24	0	16	Rio São Francisco e afluente da margem esquerda em Bom Jesus da Lapa
183	632	Rivulidae	250	Cynolebias gibbus Costa, 2001	Poça temporária a 9.5 km N de Sitio do Mato. Estado da Bahia. Brasil.	Bacia do médio S╞o Francisco. Brasil.		Costa 2001	RR	NAM	-13	-43.4167	13	0	0	s	43	25	0	6	NAM	OTO	Localidade-tipo				CERRADO	29115.8	S. Francisco	S├O FRANCISCO	VU	D2	5	SFR25	0	40	Rio São Francisco em Sítio do Mato
184	708	Rivulidae	250	Simpsonichthys adornatus Costa, 2000	Poça temporária perto de Sítio do Mato, bacia do S╞o Francisco, Estado da Bahia, Brasil.	Bacia do médio S╞o Francisco, Brasil.	Sitio do Mato, BA	?	RR	NAM	-13.0819	-43.455	13	4	55	s	43	27	18	6	NAM	OTO	Localidade-tipo				CERRADO	29115.8	S. Francisco	S├O FRANCISCO	VU	D2	5	SFR25	0	40	Rio São Francisco em Sítio do Mato
185	633	Rivulidae	250	Cynolebias gilbertoi Costa, 1998	30 km S de Bom Jesus da Lapa. Estado da Bahia. Brasil.	Bacia do S╞o Francisco.		Costa 2001	RR	NAM	-13.6667	-43.5	13	40	0	s	43	30	0	8	PAB	PAB	Localidade-tipo	Costa (2001).			CERRADO	93081.3	S. Francisco	S├O FRANCISCO	EN	B1a, b i;iii	5	SFR26	0	45	Rio São Francisco, na foz do Rio das Rãs
186	689	Rivulidae	250	Rivulus decoratus Costa, 1989	lbiraba, perto da foz do rio Icaté, Estado da Bahia, Brasil.	Bacia do S╞o Francisco.		Arcmap	RR	NAM	-10.8169	-42.9008	10	49	1	s	42	54	3	6	NAM	OTO	Localidade-tipo	Costa (1995b).			CERRADO	42190.6	S. Francisco	S├O FRANCISCO	VU	D2	5	SFR27	97.9451	85	Rio São Francisco, em Barra
190	711	Rivulidae	250	Simpsonichthys auratus Costa & Nielsen, 2000	Poça temporária junto ao rio Taboca, um afiuente do Paracaté, bacia do S╞o Francisco, Lagoa Grande, Estado de Minas Gerais, Brasil.	Drenagem do Paracatu, bacia do médio S╞o Francisco, Brasil.	Rio Taboca (das tabocas), em Lagoa Grande MG	Arcmap	RR	NAM	-17.8187	-46.434	17	49	7	s	46	26	2	5	NAM	OTO	Localidade-tipo		Estado de Conservaç╞o: Em perigo.		CERRADO	59165.6	S. Francisco	S├O FRANCISCO	VU	D2	6	SFR29	0	73	Rio Tabocas
195	726	Rivulidae	250	Simpsonichthys igneus Costa, 2000	Poça temporária perto de Igarité, bacia do S╞o Francisco, Estado da Bahia, Brasil.	Bacia do médio S╞o Francisco.	Igarité, BA	USBGN	RR	NAM	-11.6167	-43.4	11	37	0	s	43	24	0	6	NAM	OTO	Localidade-tipo				CERRADO	47268.7	S. Francisco	S├O FRANCISCO	VU	D2	5	SFR32	0	100	Vereda da Canoa e afluentes do São Francisco em Igarité
196	728	Rivulidae	250	Simpsonichthys janaubensis Costa, 2006	Planicie de inundaç╞o do rio Gorutuba, drenagem do Verde Grande, bacia do médio S╞o Francisco, Janaéba, 15°48'05,9"S 43°19'13,5"W, elev. 556 m, Estado de Minas Gerais, Brasil.	Espécies conhecida apenas da localidade-tipo.		Buckup et al 2007	RRT	NAM	-15.8016	-43.3204	15	48	6	s	43	19	14	8	PAB	PAB	Localidade-tipo				CERRADO	26278	S. Francisco	S├O FRANCISCO	EN	B1a, b i;iii	6	SFR33	0	0	Rio Gorotuba
199	746	Rivulidae	250	Simpsonichthys stellatus (Costa & Brasil, 1994)	S╞o Francisco, Estado de Minas Gerais, Brasil.	Bacia do S╞o Francisco.	Afluente da margem direita do SF, em S╞o Francisco	Arcmap	RR	NAM	-15.8844	-44.7811	15	53	4	s	44	46	52	5	NAM	OTO	Localidade-tipo		Estado de Conservaç╞o: Vulnerável.		CERRADO	17765.6	S. Francisco	S├O FRANCISCO	EN	B1a, b i;iii	5	SFR36	0	44	Afluentes e margem direita do São Francisco, em São Francisco
728	739	Rivulidae	250	Simpsonichthys radiosus Costa & Brasil, 2004	Planície de inundaç╞o do rio Crixás, aproximadamente 6 km da confiuência com o rio Paran╞, aproximadamente 15°20'S 47°20'W, aproximadamente 800 m elev., Estado de Goiás, Brasil.	Bacia do alto Tocantins.		Buckup et al 2007	RR	NAM	-15.2175	-47.3669	15	13	3	s	47	22	1	5	NAM	OTO	Localidade-tipo				CERRADO	56120.1	Tocantins - Araguaia	TOCANTINS-ARAGUAIA	EN	B1a, b i;iii	5	TOAR01	0	46	Rio Crixás
141	695	Rivulidae	250	Rivulus litteratus Costa, 2005	C6rrego do Sapo, bacia do alto Araguaia, estrada MT-100, 31 km ao sul de Alto Araguaia, 17°33'28,5"S 53°18'33, 1 "W, Municipio de Alto Araguaia, Estado de mato Grosso, Brasil.	Bacia do alto Araguaia.		Buckup et al 2007	RR	NAM	-17.5579	-53.3092	17	33	29	s	53	18	33	3	OTO	OTO	Localidade-tipo				CERRADO	27053.7	Paraguay	TOCANTINS-ARAGUAIA	EN	B1a, b i;iii	5	TOAR03	84.8597	5	Ribeirão do Sapo
140	715	Rivulidae	250	Simpsonichthys cholopteryx Costa, Moreira & Lima, 2003	Ribeir╞o do Sapo, bacia do Araguaia, 31 km ao sul de Aito Araguaia, Estado de Mato Grosso, Brasil.	Bacia do alto Ara9uaia, Brasil.	Rib do Sapo	Species link MZUSP	RR	NAM	-17.5197	-53.2591	0	0	0		0	0	0	3	OTO	OTO	Localidade-tipo				CERRADO	27053.7	Paraguay	TOCANTINS-ARAGUAIA	EN	B1a, b i;iii	5	TOAR03	84.8597	5	Ribeirão do Sapo
525	656	Rivulidae	250	Maratecoara lacortei (Lazara, 1991)	Aruan╞, Estado de Goiás, Brasil.	Bacia do Araguaia.	Poça temporária em Aruan╞, GO	Costa 2007	RR	NAM	-14.9514	-51.0233	14	57	5	s	51	1	24	3	OTO	OTO	Localidade-tipo	Costa (1995b).			CERRADO	43006.3	Tocantins - Araguaia	TOCANTINS-ARAGUAIA	EN	B1a, b i;iii	5	TOAR39	1.80513	9	Ribeirão Pinguela
528	673	Rivulidae	250	Pituna poranga Costa, 1989	Aruan╞, [aproximadamente 15°00?S 51°00? W], Estado de Goiás, Brasil.	Brejos temporários na bacia do Araguaia.	Mesma coord de Aspidoras pauciradiatus	Buckup et al 2007	RR	OTO sinoni	-14.9667	-51.0667	14	58	0	s	51	4	0	3	OTO	OTO					CERRADO	43006.3	Tocantins - Araguaia	TOCANTINS-ARAGUAIA	EN	B1a, b i;iii	5	TOAR39	1.80513	9	Ribeirão Pinguela
526	754	Rivulidae	250	Trigonectes rubromarginatus Costa, 1990	Aruan╞, Estado de Goiás, Brasil.	Bacia do Araguaia.	Poça temporária em Aruan╞, GO	Costa 2007	RR	NAM	-14.9514	-51.0233	14	57	5	s	51	1	24	3	OTO	OTO	Localidade-tipo				CERRADO	43006.3	Tocantins - Araguaia	TOCANTINS-ARAGUAIA	EN	B1a, b i;iii	5	TOAR39	1.80513	9	Ribeirão Pinguela
538	657	Rivulidae	250	Maratecoara splendida Costa, 2007	Lagoa temporária nas margens do rio Canabrava, bacia do Santa Tereza, TO-373, entre Alvorada e Peixe, 12º29'46,3"S 49º0'50,7"W, altitude 292 m, Estado de Tocantins, Brasil.	Espécie conhecida apenas da localidade-tipo.	localidade-tipo	Costa 2007	RRT	NAM, PAB	-12.4962	-49.0141	12	29	46	s	49	0	51	4	NAM	PAB	Localidade-tipo				CERRADO	25196.8	Tocantins - Araguaia	TOCANTINS-ARAGUAIA	EN	B1a, b i;iii	6	TOAR48	0	35	Rio Canabrava
539	677	Rivulidae	250	Plesiolebias canabravensis Costa & Nielsen «in» Costa, 2007	Lagoa na margem esquerda do rio Canabrava, drenagem do Santa Tereza, bacias do Tocantins, TO-373, entre Alvorada e Peixe, 12º29?46.3?S 49º0?50.7"W, altitude 292 m, Estado de Tocantins, Brasi	Espécie conhecida apenas da localidade-tipo.	Localidade-tipo	Costa et al 2007	RRT	PAB	-12.4962	-49.0141	12	29	46	s	49	0	51	4	NAM	PAB	Localidade-tipo				CERRADO	25196.8	Tocantins - Araguaia	TOCANTINS-ARAGUAIA	EN	B1a, b i;iii	6	TOAR48	0	35	Rio Canabrava
543	672	Rivulidae	250	Pituna obliquoseriata Costa, 2007	MT 326, 15 a 16 km da margem direita do Rio das Mortes, bacia do Araguaia, aproximadamente 14°00?S 51°40?W, Estado do Mato Grosso, Brasil.	Espécie conhecida apenas da localidade-tipo.	Localidade-tipo	Costa et al 2007	RR	PAB	-14	-51.6667	14	0	0	s	51	40	0	3	OTO	PAB	Localidade-tipo				CERRADO	121225	Tocantins - Araguaia	TOCANTINS-ARAGUAIA	VU	D2	4	TOAR50	51.8576	100	Rio das Mortes, entre Agua Boa e Cocalinho
544	681	Rivulidae	250	Plesiolebias lacerdai Costa, 1989	Rio das Mortes, estrada para Cocalinhos, Estado do Mato Grosso, Brasil.	Bacia do Araguaia.	Rio Das Mortes, na estrada p Cocalinho	Arcmap	RR	NAM	-14.0863	-51.6665	14	5	11	s	51	39	60	3	OTO	OTO	Localidade-tipo	Costa (1998a).			CERRADO	121225	Tocantins - Araguaia	TOCANTINS-ARAGUAIA	VU	D2	4	TOAR50	51.8576	100	Rio das Mortes, entre Agua Boa e Cocalinho
546	679	Rivulidae	250	Plesiolebias fragilis Costa, 2007	Poça temporária na margem esquerda do rio Formoso, drenagem do Javaés, bacia do Araguaia, BR-242, entre Formoso do Araguaia e S╞o Jo╞o do Javaés, 11º47?31.6"S 49º45?54.7"W, Estado do Tocant	Poça temporária na margem esquerda do rio Formoso, drenagem do Javaés, baci		Costa et al 2007	RR	PAB	-11.7921	-49.7652	11	47	32	s	49	45	55	4	NAM	PAB	Localidade-tipo				CERRADO	254535	Tocantins - Araguaia	TOCANTINS-ARAGUAIA	EN	B1a, b i;iii	4	TOAR52	0	56	Rio Formoso, bacia do Javaés
552	736	Rivulidae	250	Simpsonichthys notatus (Costa, Lacerda & Brasil, 1990)	Alvorada do Norte, Estado de Goiás, Brasil.	Rio Paran╞, bacía do Tocantins.	Afluente do Sta Maria em Alvorada do Norte GO	Arcmap	RR	NAM	-14.5294	-46.4903	14	31	46	s	46	29	25	5	NAM	OTO	Localidade-tipo		Estado de Conservaç╞o: Em perigo.		CERRADO	37531.3	Tocantins - Araguaia	TOCANTINS-ARAGUAIA	VU	D2	6	TOAR58	0	70	Afluente do Rio Santa Maria, Alvorada do Norte
553	744	Rivulidae	250	Simpsonichthys semiocellatus (Costa & Nielsen, 1997)	Poça próxima a rio Formoso, Estado do Tocantins, Brasil.	Bacia do Araguaia.	Lagoas marginais do Rio Formoso	Arcmap	RR	NAM	-10.8836	-49.8385	10	53	1	s	49	50	18	4	NAM	OTO	Localidade-tipo		Estado de Conservaç╞o: Vulnerável (como Spectroleb		CERRADO	116541	Tocantins - Araguaia	TOCANTINS-ARAGUAIA	VU	D2	4	TOAR59	0	100	Rio Formoso e Rio Morto
798	622	Rivulidae	250	Austrolebias periodicus (Costa, 1999)	Várzea do rio Santa Maria, Dom Pedrito, Estado do Rio Grande do Sul, Brasil.	Bacias do Ibicui e do Quarai, no sistema do Uruguai.	Arroio Sta Maria Chico		RR	NAM	-31.0167	-54.6833	31	1	0	s	54	41	0	1	PAB	PAB	Localidade-tipo	Costa (1999), Costa (2002c), Costa (2006a).	Estado de Conservaç╞o: Vulnerável.	Categoria de ameaça em listas regionais: Vulneráve	Pampas	88868.9	Lower Uruguay	URUGUAI	EN	B1a, b i;iii	5	URU29	0.111735	49	Rio Santa Maria em Dom Pedrito
609	288	Sarcoglanidinae	134	Microcambeva barbata Costa & Bockmann, 1994	rio S╞o Jo╞o, próximo a GaviΣes, Municipio de Silva Jardim, Estado do Rio de Janeiro, Brasil.	Rio S╞o Jo╞o, Estado do Rio de Janeiro.	Rio S╞o Jo╞o, Mun. Silva Jardim, RJ	Buckup et al.2007	RR	NAM	-22.56	-42.5666	0	0	0		0	0	0	3	OTO	OTO	Localidade-tipo		Estado de Conservaç╞o: Vulnerável.	Categoria de ameaça em listas regionais: Vulneráve	Atlantic forest	58494	Fluminense	ATLANTICO SUDESTE	EN	B1a, b i;iii	5	ASE43	98.0138	54	Rio São João, em Silva Jardim
748	287	Sarcoglanidinae	134	Ammoglanis diaphanus Costa, 1994	Riacho afluente do rio Javaés, bacia do rio Araguaia, caAO km ao norte de Araguaçu, Estado de Tocantins, Brasil.	Rio Javaés, bacia do Tocantins.	Riacho afl rio Javaés, bacia do Tocantins, TO	rio Javaés, bacia do rio Arag	RR	NAM	-10.5703	-49.9392	10	34	13	s	49	56	21	4	NAM	OTO	Localidade-tipo				CERRADO	18018.6	Tocantins - Araguaia	TOCANTINS-ARAGUAIA	VU	D2	4	TOAR65	13.0785	100	Rio Bacuri, afluente do Tocantins em Tucurui
583	71	Serrasalminae	111	Utiaritichthys longidorsalis Jégu, Tito de Morais & Santos, 1992	Rio Aripuan╞, 3 km da parte superior da Cachoeira de Dardaneios, bacia do Madeira, 9°lO'S 60040'W, Brasil.	Bacia do Madeira.	Rio Aripuan╞, bacia do Madeira, MT	Buckup et al. 2007	RR	NAM	-9.1917	-60.7417	9	11	30	s	60	44	30	14	PAB	PAB: Corrigir para 9 11 30 s 60 44 30 w (3 km acima da cachoeira)	Localidade-tipo				Amazonia	185448	Madeira Brazilian Shield	AMAZONICA	VU	D2	6	AMA51	3.97378	99	Igarapé Pardo, Rio Aripuanã
473	69	Serrasalminae	111	Mylesinus paucisquamatus Jégu & Santos, 1988	Jatobal, rio Tocantins, Estado do Pará, Brasil.	Bacia do Tocantins.	Jatobal, rio Tocantins, PA	Species link - MZUSP	RR	NAM	-4.5666	-49.65	0	0	0		0	0	0	4	NAM	OTO	Localidade-tipo		Estado de Conservaç╞o: Vulnerável.	Categoria de ameaça em listas regionais: Vulneráve	Amazonia	48537.4	Tocantins - Araguaia	TOCANTINS-ARAGUAIA	EN	B1a, b i;iii	5	TOAR06	53.7069	59	Rio Tocantins, Jatobal
611	281	Stegophilinae	133	Homodiaetus banguela Koch, 2002	Rio S╞o Jo╞o, no cruzamento com a BR-101, Municipio de Silva Jardim, Estado do Rio de Janeiro, Brasil.	Rio S╞o Jo╞o, Estado do Rio de Janeiro.	Rio S╞o Jo╞o, Mun. Silva Jardim, RJ	Species link - MZUSP	RR	NAM	-22.5666	-42.5666	0	0	0		0	0	0	8	PAB	PAB	Localidade-tipo	Koch (2002).			Atlantic forest	58494	Fluminense	ATLANTICO SUDESTE	EN	B1a, b i;iii	5	ASE43	98.0138	54	Rio São João, em Silva Jardim
21	593	Sternopygidae	146	Sternopygus castroi Triques, 2000	Igarapé Jaradá, tributário da margem direita do rio Cuieiras, cerca de 40 km acima de sua foz no rio Negro, Estado do Amazonas, Brasil.	Bacia do Cuieiras.	Igarapé Sirinau, margem direita do rio Cuieiras, cerca de 25 km da foz.	Species Link MZUSP 47987	RR	NAM	-2.7	-60.3333	0	0	0		0	0	0	12	OTO	OTO	Localidade-tipo				Amazonia	354775	Rio Negro	AMAZONICA	VU	D2	5	AMA05	88.2962	93	Rio Cuieiras
79	592	Sternopygidae	146	Rhabdolichops navalha Correa «et al»., 2006	Rio Tefé, Toco Preto, 3°47,31'S 64°59,91'W, Municipio de Tefé, Estado do Amazonas, Brasil.	Espécie conhecida apenas da localidade-tipo.		Buckup et al 2007	RRT	NAM	-3.7885	-64.9985	3	47	0	s	64	60	0	13	NAM	OTO	Localidade-tipo				Amazonia	37768.5	Amazonas Lowlands	AMAZONICA	VU	D2	6	AMA26	2.38345	98	Rio Tefé
104	594	Sternopygidae	146	Sternopygus xingu Albert & Fink, 1996	Tributário do rio Batovi, na aldeia Waura ("Sta. X"), bacia do Xingu, Estado do Mato Grosso do Sul, Brasil.	Bacia do Xingu.	Rio Batovi, a montante da Aldeia Waura e da boca do Aoala, no PI Xingu	Arcmap	RRT	OTO	-12.2369	-53.6343	12	14	13	s	53	38	3	4	NAM	OTO	Localidade-tipo				Amazonia	72306.2	Xingu	AMAZONICA	VU	D2	5	AMA39	100	100	Rio Batovi
514	591	Sternopygidae	146	Eigenmannia vicentespelaea Triques, 1996	Gruta S╞o Vicente, sistema do rio S╞o Vicente, bacia do alto Tocantins, S╞o Domingos, Estado de Goiás, Brasil.	Bacia do alto Tocantins.		Bichuette e Trajano 2006	RR	NAM	-13.5917	-46.35	13	35	30	s	46	21	0	5	NAM	OTO	Localidade-tipo		Estado de Conservaç╞o: Vulnerável.		CERRADO	102122	Tocantins - Araguaia	TOCANTINS-ARAGUAIA	EN	B1a, b i;iii	5	TOAR32	38.8289	66	Rio São Vicente
113	72	Stethaprioninae	112	Brachychalcinus parnaibae Reis, 1989	Lagoas, Serra das ConfusΣes, bacia do Parnaíba, Caracol, Estado do Piaui, Brasil.	Bacia do Parnaiba.	PNSConf	ARMAP	RR	NAM	-9.2167	-43.4833	9	13	0	s	43	29	0	6	NAM	OTO	Localidade-tipo	Reis (1989).			Caatinga	82554.8	Parnaiba	PARNAIBA	EN	B1a, b i;iii	5	PNB01	89.7259	92	Rio Baixão da Volta
436	787	Synbranchidae	287	Synbranchus lampreia Favorito, Zanata & Assumpç╞o, 2005	Rio Goiapi, tributário do rio Arari, Ilha de Marajó, Municipio de Cachoeira do Arari, aprox. 0058'S 48°57'W, Estado do Pará, Brasil.	Rio Goiapi, Ilha de Marajó, Estado do Pará.	Rio Goiapi, Ilha de Marajó, PA	Buckup et al. 2007	RR	NAM	-0.9667	-48.95	0	58	0	s	48	57	0	4	NAM	OTO	Localidade-tipo				Amazonia	35679.3	Amazonas Estuary & Coastal Drainages	AMAZONICA	VU	D2	4	AMA120	100	98	Rio Goiapi, Ilha de Marajó
245	224	Trichomycterinae	133	Ituglanis cahyensis Sarmento-Soares «et al»., 2006	Córrego dos Pai mares, 16°57'47"S 39°16'33"W, estrada Guarany-Corumbau, após entroncamento com estrada para Barra do Cahy, Municipio de Prado, Estado da Bahia, Brasil.	Espécie conhecida apenas da localidade-tipo.		Buckup et al 2007	RRT	NAM	-16.9631	-39.2758	16	57	47	s	39	16	33	8	PAB	PAB	Localidade-tipo				Atlantic forest	32571.7	Northeastern Mata Atlantica	ATLANTICO LESTE	EN	B1a, b i;iii	5	ALE23	33.2702	41	Riacho dos Palmares e riachos da costa sul da Bahia
676	238	Trichomycterinae	133	Trichomycterus bahianus Costa, 1992	Una, 6,5 km a sudeste da Vila de S╞o José, córrego afluente do ribeir╞o Caveira, bacia do rio Una, 15°35'S 39°20'W, Estado da Bahia, Brasil.	Espécie conhecida apenas da localidade-tipo.		Buckup et al 2007	RRT	NAM	-15.1181	-39.1256	15	7	5	s	39	7	32	8	PAB	PAB: Corrigir para 15 07 05 S 39 07 32 W (localidade tipo. Obs.: As coordenadas mencionadas em Buckup, 2007, est╞o obviamente erradas)	Localidade-tipo				Atlantic forest	39659.4	Northeastern Mata Atlantica	ATLANTICO LESTE	VU	D2	4	ALE39	13.7108	86	Bacias costeiras em Una, BA
60	222	Trichomycterinae	133	Ituglanis amazonicus (Steindachner, 1882)	Cudajás, 3°55' 62°00'W, Brasil.	Espécie conhecida apenas da localidade-tipo.		Buckup et al 2007	RRT	NAM	-3.9167	-62	3	55	0	s	62	0	0	12	OTO	OTO	Localidade-tipo				Amazonia	80440.6	Amazonas Lowlands	AMAZONICA	VU	D2	5	AMA13	0.533288	78	Rio Solimões, foz do Igarapé Jamacanã
61	230	Trichomycterinae	133	Ituglanis parkoi (Miranda Ribeiro, 1944)	Rio Iticoai (entre os rios das Pedras e Itui) que deságua no Javari, afluente do Amazonas, 4°30'S 70 05'W, Benjamin Constant, Estado do Amazonas Brasil.	Espécie conhecida apenas da localidade-tipo.		Buckup et al 2007	RRT	NAM	-4.5	-70.0833	4	30	0	s	70	5	0	13	NAM	OTO	Localidade-tipo				Amazonia	24259.2	Amazonas Lowlands	AMAZONICA	VU	D2	6	AMA14	0	98	Rio Branco
62	248	Trichomycterinae	133	Trichomycterus hasemani (Eigenmann, 1914)	Santarém, 2°30'S 54°50'W, Estado do Pará, Brasil.	Espécie conhecida apenas da localidade-tipo.		Buckup et al 2007	RRT	NAM	-2.5	-54.8333	2	30	0	s	54	50	0	4	NAM	OTO	Localidade-tipo				Amazonia	33012.6	Amazonas Lowlands	AMAZONICA	EN	B1a, b i;iii	5	AMA15	0	39	Afluente margem direita do Baixo Tapajós
14	244	Trichomycterinae	133	Trichomycterus gabrieli (Myers, 1926)	Corredeiras de S╞o Gabriel, rio Negro, lagos rochosos, bacia do Amazonas, 00°05'S 67°00W, Brasil.	Espécie conhecida apenas da localidade-tipo.		Buckup et al 2007	RRT	NAM	-0.0833	-67	0	5	0	s	67	0	0	13	NAM	OTO	Localidade-tipo				Amazonia	39115.7	Rio Negro	AMAZONICA	VU	D2	5	AMA92	28.0291	64	Rio Negro em São Gabriel da Cachoeira
349	229	Trichomycterinae	133	Ituglanis parahybae (Eigenmann, 1918)	Foz do rio rio Paralba do Sul, 21 °40'S 41 °OO'W, Estado do Rio de Janeiro, Brasil.	Espécie conhecida apenas da localidade-tipo.		Arcmap	RRT	NAM	-21.65	-41.0333	21	39	0	s	41	2	0	8	PAB	PAB	Localidade-tipo			Categoria de ameaça em listas regionais: Vulneráve	Atlantic forest	10200	Paraiba do Sul	ATLANTICO SUDESTE	VU	D2	5	ASE12	0	96	Foz do Rio Paraíba do Sul
816	234	Trichomycterinae	133	Scleronema minutum (Boulenger, 1891)	Município de S╞o Lorenzo, 28°30'S 54°40'W, S╞o Lourenço das MissΣes, Estado do Rio Grande do Sul, Brasil.	Espécie conhecida apenas da localidade-tipo.		Buckup et al 2007	RRT	NAM	-31.3681	-52.0067	31	22	5	s	52	0	24	1	PAB	PAB: Corrigir para 31 22 05 S 52 00 24 W (S╞o Lourenço do Sul. O W.Wosiacki provavelmente errou a localidade tipo)	Localidade-tipo				Pampas	20037.4	Laguna dos Patos	ATLANTICO SUL	EN	B1a, b i;iii	5	ASU57	0	14	Afluentes da Lagoa dos Patos em São Lorenço do Sul
135	227	Trichomycterinae	133	Ituglanis herberti (Miranda Ribeiro, 1940)	Rio Bodoquena, Pantanai, Estado do Mato Grosso, Bodoquena, 20°40'S 56°50'W, Brasil.	Espécie conhecida apenas da localidade-tipo.		Buckup et al 2007	RRT	NAM	-20.6667	-56.8333	20	40	0	s	56	50	0	3	OTO	OTO	Localidade-tipo				CERRADO	262410	Paraguay	PARAGUAI	EN	B1a, b i;iii	6	PRG05	19.5316	57	Bacia do Rio Salobra
142	255	Trichomycterinae	133	Trichomycterus johnsoni (Fowler, 1932)	Descalvados, 16°40'S 57°40'W, Estado do Mato Grosso, Brasil.	Espécie conhecida apenas da localidade-tipo.		Buckup et al 2007	RRT	NAM	-16.6667	-57.6667	16	40	0	s	57	40	0	3	OTO	OTO	Localidade-tipo				Pantanal	190922	Paraguay	PARAGUAI	VU	D2	5	PRG09	12.2624	83	Ribeirão da Costa
666	225	Trichomycterinae	133	Ituglanis eichorniarum (Miranda Ribeiro, 1912)	Cáceres, nas margens do Paraguai (M. Grosso), 16°05'"S 57°50'W, Estado do Mato Grosso, Brasil.	Espécie conhecida apenas da localidade-tipo.	Rio Paraguai a 5km N de Cáceres	ARCMAP, refinando coord em Bu	RRT	NAM	-16.0272	-57.6721	16	1	38	s	57	40	20	3	OTO	OTO	Localidade-tipo				Pantanal	26178.1	Paraguay	PARAGUAI	EN	B1a, b i;iii	5	PRG18	0	50	Rio Paraguai em Cáceres
173	274	Trichomycterinae	133	Trichomycterus santaeritae (Eigenmann, 1918)	Santa Rita, rio Preto, Brasil.	Espécie conhecida apenas da localidade-tipo.	Santa Rita de Cassia, BA	Centroide	RRT	NAM	-10.9858	-44.5581	0	0	0		0	0	0	6	NAM	OTO	Localidade-tipo				CERRADO	268531	S. Francisco	S├O FRANCISCO	VU	D2	6	SFR18	25.5593	100	Foz do Rio Preto
270	280	Trichomycterinae	133	Trichomycterus variegatus Costa, 1992	Vila de S╞o Roque, rio do Peixe, afluente do alto rio S╞o Francisco, 20°20'S 46°36'W, Estado de Minas Gerais, Brasil.	Bacia do rio do Peixe, afluente do alto rio S╞o Francisco.		Arcmap	RR	NAM	-20.2492	-46.3761	20	14	57	s	46	22	34	5	NAM	OTO	Localidade-tipo 71				CERRADO	12939.8	Upper Parana	PARANA	VU	D2	6	SFR41	27.7109	28	Rio do Peixe, Serra da Canastra
513	223	Trichomycterinae	133	Ituglanis bambui Bichuette & Trajano, 2004	Tributário superior do principal curso d'água subterrâneo da caverna Angélica, Parque Estadual Terra Ronca, 13°31 ' 46°23'W, S╞o Domingos, Estado de Goiás, Brasil.	Bacia subterrânea da Caverna Angélica, tributário do rio Paran╞, bacia do a		Buckup et al 2007	RR	NAM	-13.5167	-46.3833	13	31	0	s	46	23	0	5	NAM	OTO	Localidade-tipo				CERRADO	10082.2	Tocantins - Araguaia	TOCANTINS-ARAGUAIA	EN	B1a, b i;iii	5	TOAR32	38.8289	66	Rio São Vicente
515	231	Trichomycterinae	133	Ituglanis passensis Fernández & Bichuette, 2002	Caverna Passa Três, rio subterrâneo na bacia do Tocantins, 13°36'S 46°23'W, Municipio de S╞o Domingos, Estado de Goiás, Brasil.	Espécie conhecida apenas da localidade-tipo.		Buckup et al 2007	RRT	NAM	-13.6	-46.3833	13	36	0	s	46	23	0	5	NAM	OTO	Localidade-tipo				CERRADO	102122	Tocantins - Araguaia	TOCANTINS-ARAGUAIA	EN	B1a, b i;iii	5	TOAR32	38.8289	66	Rio São Vicente
517	226	Trichomycterinae	133	Ituglanis epikarsticus Bichuette & Trajano, 2004	Bacias de travertino na caverna S╞o Mateos, 13°40'S 46°22'W, Parque Estadual de Terra Ronca, Estado de Goiás, Brasil.	Espécie conhecida apenas da localidade-tipo.		Buckup et al 2007	RRT	NAM	-13.6667	-46.3667	13	40	0	s	46	22	0	5	NAM	OTO	Localidade-tipo				CERRADO	115256	Tocantins - Araguaia	TOCANTINS-ARAGUAIA	VU	D2	6	TOAR33	53.8997	85	Rio São Mateus, BAcia do Rio Paranan
518	233	Trichomycterinae	133	Ituglanis ramiroi Bichuette & Trajano, 2004	Poço na caverna S╞o Bernardo, 13°49'S 46°21'W, a aproximadamente 700 m da entrada, Parque Estadual Terra Ronca, S╞o Domingos, Estado de Goiás, Brasil.	Espécie conhecida apenas da localidade-tipo.		Buckup et al 2007	RRT	NAM	-13.8167	-46.35	13	49	0	s	46	21	0	5	NAM	OTO	Localidade-tipo				CERRADO	115256	Tocantins - Araguaia	TOCANTINS-ARAGUAIA	VU	D2	6	TOAR33	53.8997	85	Rio São Mateus, BAcia do Rio Paranan
520	228	Trichomycterinae	133	Ituglanis macuanima Datovo & Landim, 2005	Corlxo da Saudade, 14°17'20,6"5 51°09'12,1'W, bacia do Araguaia, Cocalinho, Estado do Mato Grosso, Brasil.	Tributários da margem esquerda do rio Araguaia.		Buckup et al 2007	RR	OTO	-14.2891	-51.1534	14	17	21	s	51	9	12	3	OTO	OTO	Localidade-tipo				CERRADO	143825	Tocantins - Araguaia	TOCANTINS-ARAGUAIA	EN	B1a, b i;iii	4	TOAR34	0	9	Corrego Jabuti, afluente margem esquerda do Araguaia
521	272	Trichomycterinae	133	Trichomycterus punctatissimus Castelnau, 1855	Araguaia, Brasil.	Espécie conhecida apenas da localidade-tipo.	Restrita a Araguaiana, unico ponto com material tombado da passagem pelo Araguaia; material de outras localidades no mesmo rio se perdeu em naufrágio, ver Papavero 1973	CIVI IBGE	RRT	NAM	-15.7339	-51.8314	15	44	2	s	51	49	53	3	OTO	OTO	Localidade-tipo				CERRADO	18640.7	Tocantins - Araguaia	TOCANTINS-ARAGUAIA	EN	B1a, b i;iii	4	TOAR35	0	7	Rio Araguaia em Araguaiana
795	235	Trichomycterinae	133	Scleronema operculatum Eigenmann, 1917	Cacequi, 29°50'S 54°55'W, Estado do Rio Grande do Sul, Brasil.	Espécie conhecida apenas da localidade-tipo.		Buckup et al 2007	RRT	NAM	-29.8333	-54.9167	29	50	0	s	54	55	0	1	PAB	PAB	Localidade-tipo				Pampas	362339	Lower Uruguay	URUGUAI	EN	B1a, b i;iii	4	URU26	0	53	Rio Santa MAria, em Cacequi
675	73	Triportheinae	114	Lignobrycon myersi (Miranda Ribeiro, 1956)	Rio do Braço, Ilhéus, Estado da Bahia, Brasil.	Bacia do rio do Braço.	Cabeceiras do Rio do Braço	Arcmap	RR	NAM	-14.7647	-39.4055	14	45	53	s	39	24	20	8	PAB	PAB	Localidade-tipo	Castro & Vari (1990), Malabarba (1998b).	Estado de Conservaç╞o: Vulnerável.		Atlantic forest	18609.4	Northeastern Mata Atlantica	ATLANTICO LESTE	EN	B1a, b i;iii	5	ALE38	15.7999	15	Rio do Braço

## Sheet: AREAS
SUM_HECTAR	ORD	UHEF	BACIA	CODIGO	PROTECAO(%)	REMANESCENTE(%)	NOME AREA	BACIA CRITICA?
81725	4	4	ATLANTICO LESTE	ALE12	0.00187726	88	Rio Jequitinhonha	1
582400	5	4	ATLANTICO LESTE	ALE15	6.64356	44	Medio Jequitinhonha	1
109273	4	4	ATLANTICO LESTE	ALE22	16.4537	70	Medio Paraguaçu	1
96947	5	4	ATLANTICO LESTE	ALE28	0	47	Rio Araçuaí	1
305381	6	4	ATLANTICO LESTE	ALE31	0.34151	19	Foz do Jequitinhonha	1
139850	6	4	AMAZONICA	AMA08	36.8856	55	Uatumã/Pitinga	1
43315.5	6	4	AMAZONICA	AMA101	0	79	Igarapé Cujobim	1
16653.1	5	4	AMAZONICA	AMA114	100	91	Igarapé Caxipacoré, no Trombetas	1
15087.4	5	4	AMAZONICA	AMA122	89.3209	81	Rio Trombetas, na região da Cachoeira Vira-Mundo	1
15087.4	5	4	AMAZONICA	AMA123	100	48	Rio Trombetas a montante da Cachoeira Porteira	1
136125	5	4	AMAZONICA	AMA33	0	34	Rio Xingu, Altamira	1
132525	5	4	AMAZONICA	AMA34	0	46	Rio Xingu, Costa Junior, Altamira	1
119866	6	4	AMAZONICA	AMA35	48.3517	92	Rio Curuá	1
64206.5	6	4	AMAZONICA	AMA49	0	45	Cachoeira de Dardanelos, Rio Aripuanã	1
210119	5	4	AMAZONICA	AMA50	21.0389	51	Rio Jamari	1
68315.7	6	4	AMAZONICA	AMA53	28.8852	57	Rio Madeira, Porto Velho	1
87475.1	6	4	AMAZONICA	AMA58	0	79	Igarapé Piracolina	1
170949	6	4	AMAZONICA	AMA82	3.03921	85	Ribeirão do Machado	1
28303	5	4	ATLANTICO SUDESTE	ASE05	0	62	Rio da Prata, bacia do Santa Maria	1
917764	5	4	ATLANTICO SUDESTE	ASE08	15.3248	43	Rio Paraiba do Sul	1
61350.3	4	4	ATLANTICO SUDESTE	ASE09	0.735963	12	Rio Paraíba do Sul, em Campos	1
43759.5	5	4	ATLANTICO SUDESTE	ASE16	0	61	Rio dos Macacos, bacia do RIo Guandu	1
58350	5	4	ATLANTICO SUDESTE	ASE25	62.2441	95	Rio Iporanga	1
66237.9	5	4	ATLANTICO SUDESTE	ASE34	91.712	95	Rio Verde em Tapiraí	1
30787.5	6	4	ATLANTICO SUDESTE	ASE37	0.599289	19	Drenagens costeiras em Itaguaí	1
39700	5	4	ATLANTICO SUL	ASU03	0	44	Rio Itajaí-açu	1
50149.9	5	4	ATLANTICO SUL	ASU11	73.7345	68	Rio Cubatão em Joinville	1
51603	5	4	ATLANTICO SUL	ASU24	0	57	Rio Santa Maria	1
120900	6	4	PARAGUAI	PRG15	6.7246	7	Bacia do Rio Correntes	1
72306.1	5	4	PARANA	PRN04	5.76324	63	Bacia do Rio Grande em Delfinópolis	1
353072	6	4	PARANA	PRN05	0	61	Bacia do São Marcos	1
98269	6	4	PARANA	PRN11	58.9474	9	Córrego Pedra Azul, Rio Sucuriu	1
128694	6	4	PARANA	PRN14	0	0	Bacia do Pardo	1
27549.9	6	4	PARANA	PRN28	0	2	Rio Piquiri em Nova Laranjeiras	1
453941	6	4	PARANA	PRN35	0.257554	22	Bacia do Rio Pardo na região de Poços de Caldas	1
256453	6	4	PARANA	PRN42	0.295472	12	Ribeirão Taquari e Rio Tibaji	1
27142.9	5	4	PARANA	PRN46	0	27	Rio Paraná em Ilha Solteira	1
37562.4	6	4	PARANA	PRN48	0	0	Rio Paranaíba, em São Simão	1
221075	4	4	PARANA	PRN51	0	11	Rio Paraná em Tres Lagoas	1
63947	5	4	PARANA	PRN54	0.0397719	13	Rio Iguaçu em Porto União	1
7931.13	6	4	PARANA	PRN58	0	7	Rio Chopim, Bacia do Iguaç·	1
22943.8	6	4	PARANA	PRN62	0	1	Rio Iguaçu em Nova Prata do Iguaçu	1
514066	6	4	S├O FRANCISCO	SFR15	7.9215	84	Rio das Velhas em Lagoa Santa	1
33840.1	4	4	TOCANTINS-ARAGUAIA	TOAR04	8.15916	25	Rio Tocantins, Tucuruí	1
134393	4	4	TOCANTINS-ARAGUAIA	TOAR09	40.3789	100	Alto Rio Tocantins, Serra da Mesa	1
108532	5	4	TOCANTINS-ARAGUAIA	TOAR10	46.9788	100	Rio Tocantinzinho	1
56931.1	5	4	TOCANTINS-ARAGUAIA	TOAR19	0	100	Rio Palmeira	1
24368.9	6	4	TOCANTINS-ARAGUAIA	TOAR24	0	100	Alto Rio Tocantins, Corrego Indaial	1
172150	4	4	TOCANTINS-ARAGUAIA	TOAR46	0.0314779	74	Rio das Mortes em Nova Xavantina	1
17709.4	5	4	TOCANTINS-ARAGUAIA	TOAR62	0.0941896	100	Rio Tocantins, afluente margem direita apos foz Rio do Carmo	1
23596	4	4	TOCANTINS-ARAGUAIA	TOAR69	71.6431	67	Afluente do Rio Tocantins, em Tucurui	1
73171.7	4	4	URUGUAI	URU06	1.22886	25	Rio Canoas em Anita Garibaldi	1
42709.4	6	4	URUGUAI	URU09	8.3304	4	Arroio Lajeado Grande	1
59634.4	4	4	URUGUAI	URU10	0	29	Medio Rio Canoas	1
18415.5	6	4	URUGUAI	URU11	0	4	Alto Uruguai, Aratiba	1
112297	6	4	URUGUAI	URU14	0	7	Arroio Albino, Rio Ijuí	1
508677	4	3	ATLANTICO LESTE	ALE10	6.65234	57	Rio Itacambiruçu	1
18971.8	6	3	ATLANTICO LESTE	ALE11	0	100	Corrego Divisão e Bacia do Agua Suja	1
11775	5	3	ATLANTICO LESTE	ALE35	0	28	Rio Jequitinhonha em Araçuai	1
100075	5	3	ATLANTICO LESTE	ALE44	1.23426	24	Foz do Rio Pardo e Rio Salsa	1
32240.4	6	3	AMAZONICA	AMA107	19.7129	93	Rio Pitinga	1
31774.8	5	3	AMAZONICA	AMA115	7.26618	96	Rio Jari, nas cachoeiras Itacari e Santo Antonio	1
92374.9	5	3	AMAZONICA	AMA46	2.9713	54	Rio Xingu, Cachoeira do Bacabal	1
32368.8	6	3	AMAZONICA	AMA48	0	88	Igarapé do Porto, Rio Aripuanã	1
95821.9	6	3	AMAZONICA	AMA54	0	73	Rio Natal	1
64977.9	6	3	AMAZONICA	AMA59	2.01467	55	Rio Candeias	1
65487.4	6	3	AMAZONICA	AMA65	34.1233	99	Rio São Bento	1
22253.1	6	3	AMAZONICA	AMA72	98.765	100	Rio Papagaio	1
207057	5	3	AMAZONICA	AMA79	0	49	Rio Formiga, Alto Juruena	1
61309.6	6	3	AMAZONICA	AMA81	0	36	Bacia do Rio Branco, afluente do Guaporé	1
49815	6	3	ATLANTICO SUDESTE	ASE11	0	19	Cabeceiras do Rio Paraíba do Sul	1
126749	5	3	ATLANTICO SUDESTE	ASE13	0.293104	23	Rio PAraibuna, em Juiz de Fora	1
13209.4	6	3	ATLANTICO SUDESTE	ASE15	0	7	Rio Muriaé	1
19875	6	3	ATLANTICO SUDESTE	ASE21	0	22	Bacia do RIo são Francisco, medio Paraíba do Sul	1
57758.2	5	3	ATLANTICO SUDESTE	ASE22	47.6265	80	Drenagens costeiras em Cubatão	1
177784	5	3	ATLANTICO SUDESTE	ASE31	76.9638	91	Afluentes do Rio Juquiá em Miracatu e Pedro de Toledo	1
26259.2	5	3	ATLANTICO SUDESTE	ASE33	59.8174	87	Alto Ribeira de Iguape em Eldorado	1
285244	4	3	ATLANTICO SUL	ASU10	3.60955	48	BAcia do Rio Itapucu	1
51839.8	5	3	ATLANTICO SUL	ASU12	16.092	56	Bacias Costeiras em Joinville e Araquari	1
64062.5	6	3	ATLANTICO SUL	ASU19	0	74	Bacia do Taquari	1
49112.4	6	3	ATLANTICO SUL	ASU20	0	73	Bacia do Rio da Prata	1
115058	6	3	ATLANTICO SUL	ASU21	0.240382	79	Bacia do Rio Santa Rita	1
80931.4	6	3	ATLANTICO SUL	ASU54	0	68	Rio Forqueta	1
142522	6	3	ATLANTICO SUL	ASU59	17.6777	90	Afluentos do Alto Rio das Antas	1
57421.7	5	3	PARAGUAI	PRG12	0	90	Bacia do Rio Cabaçal	1
164357	6	3	PARAGUAI	PRG16	0.323117	0	Rio Itiquira	1
11956.4	6	3	PARANA	PRN02	0	0	Rio Corumbá	1
92809.2	6	3	PARANA	PRN03	0	1	Rio Araguari, Nova Ponte	1
167164	6	3	PARANA	PRN06	8.75795	100	Alto Rio Araguari	1
227825	6	3	PARANA	PRN09	2.52998	4	Córrego Paulicéia e bacia do Mogi Guaçu	1
172497	6	3	PARANA	PRN10	0	5	Rio Cubatão e bacia do Pardo	1
166429	6	3	PARANA	PRN16	42.4343	47	Ribeirão Santana e Rio São Bartolomeu	1
25600.2	6	3	PARANA	PRN19	0	0	Rio São Domingos, Bacia do Paraná	1
261034	6	3	PARANA	PRN20	0	0	Rio Doce, Bacia do Alto Rio Claro	1
150350	6	3	PARANA	PRN22	0.0762102	0	Rio Verde, bacia do Paraná	1
120251	6	3	PARANA	PRN25	59.8151	60	Rio Formoso	1
24127.9	6	3	PARANA	PRN29	91.9553	78	Rio Sapucaí	1
270669	5	3	PARANA	PRN30	9.31808	37	Alto TietÛ	1
301799	5	3	PARANA	PRN31	32.4643	54	Rio Piraí no PE Caxambu	1
78443.8	6	3	PARANA	PRN32	0	1	Ribeirão Santa Bárbara	1
10965.5	6	3	PARANA	PRN36	0	13	Córrego Agua Limpa em Carrancas	1
97881.2	6	3	PARANA	PRN41	0.1938	28	Corrego Juruba e Bacia do Taquara	1
25247.3	6	3	PARANA	PRN44	0	54	Alto TietÛ no Alto da Serra	1
63928.2	6	3	PARANA	PRN50	0	4	Bacia do Ribeirão dos Patos, Promissão	1
70512.4	5	3	PARANA	PRN56	19.4056	20	Foz do Rio Jordão	1
159678	5	3	PARANA	PRN57	19.4832	40	Bacia do Iguaçu em Ibituruna	1
114878	5	3	PARANA	PRN60	3.34796	56	Bacia do Rio Pinhão	1
17993.6	5	3	PARANA	PRN61	0	38	Corrego Passo do Aterrado, Bacia do Rio Jordão	1
238613	5	3	S├O FRANCISCO	SFR06	18.2152	43	Rio São Franciscoe afluentes, em Januária	1
33440.5	6	3	S├O FRANCISCO	SFR12	0	96	Lagoa Santa e afluentes do Rio das Velhas	1
29881.2	6	3	S├O FRANCISCO	SFR17	72.3115	8	Afluentes do São Francisco em Itacarambi	1
70059.4	6	3	S├O FRANCISCO	SFR34	0	81	Rio São Francisco acima da Foz do Rio das Velhas	1
175803	6	3	S├O FRANCISCO	SFR38	4.35684	100	Rio Para·na	1
198153	5	3	TOCANTINS-ARAGUAIA	TOAR56	11.4315	91	Rio Bezerra, Bacia do Paranan	1
49272.2	4	3	TOCANTINS-ARAGUAIA	TOAR67	0	43	Rio Tocantins em Marabá	1
95100	6	3	URUGUAI	URU01	0	14	Rio Jacutinga	1
68221.6	4	3	URUGUAI	URU02	0.34411	17	Rio Ibicui	1
27325	6	3	URUGUAI	URU12	5.73939	9	Alto Uruguai em Chapecó	1
130813	6	3	URUGUAI	URU15	0	1	Rio Comandaí	1
10612.6	6	3	URUGUAI	URU18	0	8	Rio Apuaé em MArcelino Ramos	1
47784.6	6	2	ATLANTICO LESTE	ALE13	2.741	99	Rio Fanado	0
37918.9	6	2	ATLANTICO LESTE	ALE14	27.0578	100	Ribeirão das Pedras	0
6174.86	6	2	ATLANTICO LESTE	ALE18	0	40	Rio Jequitinhonha, abaixo foz do Araçuaí	0
40112.3	6	2	ATLANTICO LESTE	ALE37	0	9	Afluente do Mucuri, Carlos Chagas	1
144647	5	2	AMAZONICA	AMA111	77.0266	92	Rio Branco, no Igarapé Carneiro	0
21812.4	6	2	AMAZONICA	AMA28	100	87	Igarapé Mutum	0
79259.1	5	2	AMAZONICA	AMA42	50.2661	80	Rio Xingu, Cachoeira do Espelho	0
113369	6	2	AMAZONICA	AMA52	0	22	Igarapé Palmeira	1
47193.6	6	2	AMAZONICA	AMA55	0	57	Rio Machado	0
15421.9	6	2	AMAZONICA	AMA71	0	73	Rio dos Peixes	0
56974.8	5	2	AMAZONICA	AMA76	0	27	Bacia do Rio Cravari	1
40624.9	6	2	AMAZONICA	AMA83	22.9274	87	Igarapé do 13	0
65426	5	2	ATLANTICO SUDESTE	ASE01	6.4377	40	Rio Fundão	0
32849.4	5	2	ATLANTICO SUDESTE	ASE02	25.756	33	Rio Santo Antonio	0
44853.2	6	2	ATLANTICO SUDESTE	ASE17	2.14478	47	Rio Paraiba do Sul em Barra do Piraí	0
33406.4	6	2	ATLANTICO SUDESTE	ASE18	0	45	Rio Preto, drenagem do Paraíba do Sul	0
23608.9	6	2	ATLANTICO SUDESTE	ASE32	0.750291	92	Rio São Lourenço	0
28415.5	5	2	ATLANTICO SUDESTE	ASE35	69.0534	82	Rio Juquiá	0
21469.8	6	2	ATLANTICO SUDESTE	ASE38	0	76	Afluentes do Ribeira de Iguape em Apiaí	0
48012.5	6	2	ATLANTICO SUDESTE	ASE39	41.4328	87	Bacias costeiras em Angra dos Reis	0
133514	5	2	ATLANTICO SUDESTE	ASE40	20.9807	34	Rios costeiros no Rio de JAneiro	0
41537.7	5	2	ATLANTICO SUL	ASU01	66.0103	92	Afluentes do canal de Paranaguá em Morretes	0
40088.9	6	2	ATLANTICO SUL	ASU05	77.7259	83	Rio Araraquara, Garuva	0
85533.6	5	2	ATLANTICO SUL	ASU07	32.0489	88	Bacias Costeiras em Paranaguá	0
28881.3	6	2	ATLANTICO SUL	ASU16	2.56969	80	Rio Caí	0
186991	6	2	ATLANTICO SUL	ASU18	0	13	Alto Rio Jacui	1
56022.2	6	2	ATLANTICO SUL	ASU22	10.3487	72	Rio Maquiné	0
18378.2	6	2	ATLANTICO SUL	ASU25	0	70	Arroi Espeto	0
34148.1	5	2	ATLANTICO SUL	ASU26	0	15	Rio Jacuí	1
63654	6	2	ATLANTICO SUL	ASU28	0	56	Arroio Tipiaia	0
132378	5	2	ATLANTICO SUL	ASU32	0.0523987	17	Bacia do Rio Rolante	1
29629.4	6	2	ATLANTICO SUL	ASU36	0	57	Arroio Arenal	0
24471.8	6	2	ATLANTICO SUL	ASU45	23.2712	33	Bacias dos rios Faxinalzinho e Mampituba	0
27025.8	6	2	ATLANTICO SUL	ASU55	4.06343	7	Bacia do rio Capingui	1
90537.3	6	2	ATLANTICO SUL	ASU56	5.66367	90	Alto Rio Garrafa, Afluente do Rio das Antas	0
10393.7	6	2	PARAGUAI	PRG07	0	100	Rio Cuiabá em Nobres	0
52571.9	6	2	PARAGUAI	PRG17	100	89	Ribeirão Sozinho, bacia do Itiquira	0
43053.2	6	2	PARANA	PRN08	0	0	Ribeirão da Bocaina, em Passos	1
206891	6	2	PARANA	PRN15	0.477976	0	Rio Mogi Guaçu e Cachoeira de Emas	1
95640.3	6	2	PARANA	PRN23	80.6174	2	Rio Paraiso, afluente do Sucuri·	0
50771.9	6	2	PARANA	PRN24	70.2558	26	Corrego Roncador e Bacia do Gama	0
55693.7	6	2	PARANA	PRN27	6.00843	0	Rio Tamanduá	1
68659.6	6	2	PARANA	PRN33	0	16	Bacia do Rio Claro	1
25596.8	6	2	PARANA	PRN34	57.945	60	Afluentes do Paranapanema do PE Morro do Diabo	0
61318.6	6	2	PARANA	PRN40	0	0	Bacia do Rio São João	1
27828.2	6	2	PARANA	PRN45	0	4	Rio TietÛ, Avanhandava	1
69508.8	6	2	PARANA	PRN64	2.59017	57	Rio da Várzea	0
13890.6	6	2	S├O FRANCISCO	SFR02	0	65	Rio São Francisco e Foz do Paje·	0
58305.3	5	2	S├O FRANCISCO	SFR19	0	57	Riacho da Prata	0
272737	6	2	S├O FRANCISCO	SFR39	55.0982	76	Alto Rio das Velhas	0
73246.6	6	2	S├O FRANCISCO	SFR40	0.651761	25	Riacho Agua Limpa, Afluente do Paraopeba	1
309336	4	2	TOCANTINS-ARAGUAIA	TOAR29	1.41355	100	Rio Tocantins, Ipueiras	0
12313.2	5	2	TOCANTINS-ARAGUAIA	TOAR40	0	25	Alto Garças	1
195392	4	2	TOCANTINS-ARAGUAIA	TOAR53	0	54	Rio Bonito, Alto Caiapó	0
15396.9	5	2	TOCANTINS-ARAGUAIA	TOAR57	0	100	Rio dos Patos, Alto Rio Maranhão	0
123041	5	2	URUGUAI	URU03	0	43	Rio das Marombas	0
23534.3	6	2	URUGUAI	URU08	0	6	Rio Chapeco, afluente em Manuel Freitas	1
73401.7	4	2	URUGUAI	URU13	0	13	Rio Uruguai em Santo Izidro	1
12303.1	6	2	URUGUAI	URU16	0	33	Arroio Passo do Alto, São Nicolau	0
50316.5	6	2	URUGUAI	URU19	3.10288	1	Cabeceiras do Rio Caraguatá	1
50562.6	6	2	URUGUAI	URU20	0	5	Rio Pelotas em Marcelino Ramos	1
121326	5	2	URUGUAI	URU22	0	85	Rio Pelotas em Esmeralda	0
45277.3	5	2	URUGUAI	URU23	0	98	Rio dos Touros e Arroio Agua Branca	0
38617.6	5	2	URUGUAI	URU24	0	91	Afluente do Rio Pelotas, São José dos Ausentes	0
72037.2	6	2	URUGUAI	URU28	1.48723	22	Rio Ibicuí Mirim	1
16165.6	6	2	URUGUAI	URU30	0	14	Rio Piratini em São Nicolau	1
18934.5	6	1	ATLANTICO LESTE	ALE17	14.6122	92	Corrego Jiçara	0
75981.2	5	1	ATLANTICO LESTE	ALE24	0	56	Rio Jucurucu	0
63243.6	6	1	ATLANTICO LESTE	ALE41	0	29	Rio Mucuri	1
529844	4	1	ATLANTICO LESTE	ALE43	1.75512	8	Bacias costeiras no norte do Espirito Santo	1
35984.3	6	1	ATLANTICO LESTE	ALE46	6.48567	16	Rio Todos os Santos	1
167941	5	1	AMAZONICA	AMA01	0	30	Igarape Rio Branco	1
21256.2	6	1	AMAZONICA	AMA102	1.21083	62	Medio Rio Jari	0
22178.1	6	1	AMAZONICA	AMA103	98.6463	98	Rio Trombetas, Acima do Igarapé Caxipacoré	0
33116	6	1	AMAZONICA	AMA104	16.0892	81	Medio Amapari	0
15372	5	1	AMAZONICA	AMA105	49.5292	88	Afluentes do Rio Branco em Boa Vista	0
104028	5	1	AMAZONICA	AMA106	100	100	Alto Amapari	0
114447	5	1	AMAZONICA	AMA108	35.3861	95	Rio Uraricoera	0
16593.8	6	1	AMAZONICA	AMA110	0	80	Baixo Rio Mucajaí	0
54174.9	6	1	AMAZONICA	AMA117	100	98	Bacia do Trombetas, na REBIO Trombetas	0
75240.4	6	1	AMAZONICA	AMA40	99.9676	100	Igarapé São Pedro	0
55882.5	6	1	AMAZONICA	AMA60	0	77	Rio Cinta-larga	0
232003	6	1	AMAZONICA	AMA62	22.5769	72	Rio Piolho	0
52537.5	5	1	AMAZONICA	AMA63	0	65	Alto Juruena	0
256559	5	1	AMAZONICA	AMA64	0	69	Rio Manoel Gomes	0
127813	5	1	AMAZONICA	AMA68	0	87	Alto Rio Criquirim	0
20571.8	6	1	AMAZONICA	AMA74	8.22416	93	Rio Doze de Outubro	0
34615.5	6	1	AMAZONICA	AMA75	69.015	97	Rio Mutum, bacia do Juruena	0
58550.2	6	1	AMAZONICA	AMA80	0	84	Rio Galera	0
339015	4	1	ATLANTICO NORDESTE ORIENTAL	ANOR08	6.46615	16	Rio Ipojuca	1
28478.1	4	1	ATLANTICO SUDESTE	ASE04	5.5603e-05	32	Rio Santo Antonio	0
30600.2	5	1	ATLANTICO SUDESTE	ASE07	20.2532	35	Afluente do Rio Pancas	0
107428	4	1	ATLANTICO SUDESTE	ASE10	0	22	Rio Paraíba do Sul, Baixo curso	1
22297	5	1	ATLANTICO SUDESTE	ASE14	16.972	56	Rio Santo Antonio e Bengala	0
15340.6	6	1	ATLANTICO SUDESTE	ASE19	0	10	Rio Paraiba do Sul em TrÛs Rios	1
46009.4	5	1	ATLANTICO SUDESTE	ASE20	17.9815	38	Bacias costeiras em Nova Iguaçu	0
32023.8	5	1	ATLANTICO SUDESTE	ASE23	99.995	91	Rio Quilombo	0
43003	5	1	ATLANTICO SUDESTE	ASE24	41.2871	74	Rio Ribeira do Iguape	0
45820	6	1	ATLANTICO SUDESTE	ASE26	42.1989	94	Bacias costeiras em Bertioga	0
86238.6	6	1	ATLANTICO SUDESTE	ASE27	81.8827	97	Drenagens costerias entre Ubatuba e Parati	0
119891	5	1	ATLANTICO SUDESTE	ASE28	38.5785	85	Rio Una da LAdeia e Foz do Ribeira de Iguape	0
19056.2	5	1	ATLANTICO SUDESTE	ASE29	3.12623	33	Bacias costeiras em Santos	0
40353.1	5	1	ATLANTICO SUDESTE	ASE30	43.4573	76	Rio do Queimado em Cajati	0
23346.8	6	1	ATLANTICO SUDESTE	ASE36	99.9155	99	Rio Una do Prelado	0
16240.6	6	1	ATLANTICO SUDESTE	ASE41	34.3943	49	Bacia do Guapimirim	0
44412.8	6	1	ATLANTICO SUDESTE	ASE42	35.0532	51	Rio Macacu	0
26365.8	6	1	ATLANTICO SUDESTE	ASE44	19.4233	58	Drenagens Serranas em Teresópolis	0
35481.3	6	1	ATLANTICO SUDESTE	ASE45	32.5149	47	Drenagens costeiras em MAgé e Duque de Caxias	0
60575	4	1	ATLANTICO SUDESTE	ASE54	1.69873	33	Rio Manhuaçu	0
38987.8	6	1	ATLANTICO SUL	ASU04	96.9321	99	Bacias costeiras em Guaraqueçaba	0
181029	5	1	ATLANTICO SUL	ASU06	2.76704	33	Rio Braço do Norte	0
19592.2	6	1	ATLANTICO SUL	ASU08	23.0922	92	Drenagens do sistema de Paranaguá, Em Antonina	0
18303.2	6	1	ATLANTICO SUL	ASU09	90.9184	89	Drenagens do sistema de Paranaguá e Guaratuba	0
22624.9	6	1	ATLANTICO SUL	ASU13	0	76	Rio Saí-Mirim	0
30565.7	6	1	ATLANTICO SUL	ASU17	0	41	Afluentes do Alto Rio Caí	0
60590.4	5	1	ATLANTICO SUL	ASU23	4.00056	18	Rio dos Sinos	1
264582	5	1	ATLANTICO SUL	ASU27	0	21	Drenagens ao Norte da Lagoa dos Patos	1
72502.9	5	1	ATLANTICO SUL	ASU42	0	76	Bacia do Rio Caí	0
32525	6	1	ATLANTICO SUL	ASU43	3.45889	64	Afluentes da Lagoa dos Patos, Rio Guaiba	0
4033.57	6	1	ATLANTICO SUL	ASU46	5.60476	50	Rio Jordão	0
11436	6	1	ATLANTICO SUL	ASU49	9.05562	57	Rio Mãe Luzia	0
29790.9	5	1	ATLANTICO SUL	ASU51	6.01535	43	Bacia do Rio Pique	0
75706.3	6	1	ATLANTICO SUL	ASU53	0	32	Arroio Castelhano	0
410254	5	1	PARAGUAI	PRG01	5.96731	61	Rio Paraguai na Serra das Araras	0
65140.6	6	1	PARAGUAI	PRG03	61.4221	88	Rio Claro	0
35384.5	6	1	PARAGUAI	PRG06	86.6595	66	Bacia do Rio Mutuca, Chapada dos Guimarães	0
196866	5	1	PARAGUAI	PRG13	1.57726	38	Rio Taquari, Baixo curso	0
332825	6	1	PARAGUAI	PRG14	0	7	Rio Taquari, medio curso	1
64501.6	6	1	PARANA	PRN01	3.01508	25	Rio Carandaí	1
82360.3	6	1	PARANA	PRN07	94.7907	41	Alto São Bartolomeu	0
11762.5	6	1	PARANA	PRN12	99.1116	0	Alto Corumbataí	0
41078.3	6	1	PARANA	PRN13	0.182901	2	Rio Piracicaba	1
192311	6	1	PARANA	PRN17	1.51388	0	Rio Meia Ponte	1
37909.1	6	1	PARANA	PRN18	0	0	Corrego Buriti e Aldeia	1
40528.1	6	1	PARANA	PRN37	55.7119	30	Rio Capivari	0
28525	6	1	PARANA	PRN38	0.976661	9	Bacia do Picacicaba acima de Salto	1
19453.2	6	1	PARANA	PRN39	0	9	Rio do Cubatão	1
178665	6	1	PARANA	PRN49	99.1625	63	Bacia do Iguatemi	0
27673.6	6	1	PARANA	PRN55	60.2809	39	Rio Iguaçu em Piraquara	0
146091	5	1	PARANA	PRN59	7.42492	46	Rio Iguaçu em União da Vitória	0
40748.3	6	1	PARANA	PRN63	26.5819	8	Alto Rio Iguaçu, Serrinha	1
18918.7	6	1	S├O FRANCISCO	SFR08	82.4887	0	Rio São Francisco e afluentes, em Itacarambi	0
68214.6	6	1	S├O FRANCISCO	SFR10	8.15699	6	Bacia do São Francisco, em Manga	1
37256.4	5	1	S├O FRANCISCO	SFR14	46.6901	0	Bacia do Córrego Escuro	0
40443.6	6	1	S├O FRANCISCO	SFR16	0	63	Rio São Miguel, Bacia do Urucuia	0
52565.5	6	1	S├O FRANCISCO	SFR22	0	91	Riacho Enfurnado	0
647881	4	1	S├O FRANCISCO	SFR28	0	54	Rio Paracatu, em Brasilandia de Minas	0
57469.1	6	1	S├O FRANCISCO	SFR30	0	45	Rio Urucuia	0
38418.8	6	1	S├O FRANCISCO	SFR31	0	45	Corrego das Lajes e Medio Rio Preto, Alto São Francisco	0
91746.7	5	1	S├O FRANCISCO	SFR35	0	43	Riacho do Barro	0
17237.6	6	1	S├O FRANCISCO	SFR37	0	0	Afluentes do Rio Preto na altura do Ribeirão Entre Rios	1
266568	4	1	TOCANTINS-ARAGUAIA	TOAR05	35.737	79	Alto Rio Itacaiunas	0
74220.9	4	1	TOCANTINS-ARAGUAIA	TOAR08	100	100	Igarapé Pojuca e Alto Rio Itacaiunas	0
12500	6	1	TOCANTINS-ARAGUAIA	TOAR11	0	100	Corrego do Jacaré, Bacia do Araguaia	0
37821.9	5	1	TOCANTINS-ARAGUAIA	TOAR14	100	100	Córrego Ave Maria	0
22453.2	6	1	TOCANTINS-ARAGUAIA	TOAR16	0	100	Alto Rio do Peixe	0
77643.8	5	1	TOCANTINS-ARAGUAIA	TOAR17	14.9346	30	Alto Rio Vermelho	1
27125	5	1	TOCANTINS-ARAGUAIA	TOAR18	56.2943	100	Rio dos Couros	0
16568.1	6	1	TOCANTINS-ARAGUAIA	TOAR26	95.1999	100	Corrego Cana Brava, Rio Vermelho	0
31584.4	6	1	TOCANTINS-ARAGUAIA	TOAR36	0	100	Ribeirão das Brancas	0
197131	4	1	TOCANTINS-ARAGUAIA	TOAR38	0.85832	42	Rio São Patricio	0
128241	4	1	TOCANTINS-ARAGUAIA	TOAR42	0	93	Corrego Agua Azul	0
16306.4	5	1	TOCANTINS-ARAGUAIA	TOAR47	0	100	Rio Crixás bacia do Tocantins	0
18834.4	6	1	TOCANTINS-ARAGUAIA	TOAR49	0	100	Corrego São Felipe, baixo rio Formiga	0
166537	6	1	TOCANTINS-ARAGUAIA	TOAR51	7.06167	38	Rio Tocantins, a jusante de Sampaio	0
39068.8	5	1	TOCANTINS-ARAGUAIA	TOAR54	35.3095	56	Ribeirão Dom Bosco	0
112390	5	1	TOCANTINS-ARAGUAIA	TOAR55	0	62	Ribeirão Canabrava, Vila Boa	0
25509.2	5	1	TOCANTINS-ARAGUAIA	TOAR63	0	100	Corrego Agua Boa, bacia do Tocantins	0
21568.5	5	1	TOCANTINS-ARAGUAIA	TOAR64	100	100	Corrego Areia, bacia do Claro, Afluente do Paranan	0
47915.4	5	1	URUGUAI	URU05	0	84	Rio das Caveiras	0
42762.3	6	1	URUGUAI	URU21	0	7	Rio Ligeiro em Maximilianode Almeida	1
104605	5	1	URUGUAI	URU25	0	3	Rio Conceição em Ijui	1
13572	6	1	URUGUAI	URU27	0	10	Afluentes do Uruguai em São Borja	1
78243.4	5	0	ATLANTICO LESTE	ALE01	38.1928	18	Rio Pratinha e Bacia do Agua de Rega	0
33137.4	6	0	ATLANTICO LESTE	ALE02	99.9711	100	Rio Lencóis	0
18068.8	6	0	ATLANTICO LESTE	ALE03	48.8082	100	Rio Grisane em Mucujê	0
12956.2	5	0	ATLANTICO LESTE	ALE04	86.6259	94	Rio Mucujê	0
343287	4	0	ATLANTICO LESTE	ALE05	0.780398	78	Rio Itapicuru mirim	0
140053	5	0	ATLANTICO LESTE	ALE06	0.138785	88	Riacho Do Rosario, Bacia do Vaza Barris	0
26024.9	6	0	ATLANTICO LESTE	ALE07	0	32	Rio Paraguaçu em Iaçu	0
192584	4	0	ATLANTICO LESTE	ALE08	0.0589887	95	Bacia do Itapicuru	0
45584.4	6	0	ATLANTICO LESTE	ALE09	0.794209	100	Bacia do Jaucuipe em Morro do Chapeu	0
70872	5	0	ATLANTICO LESTE	ALE16	82.9632	8	Rio Capivara, Arembepe	0
23125.2	6	0	ATLANTICO LESTE	ALE19	0	43	Rio Pardo e Afluente em Candido Sales	0
43012.6	5	0	ATLANTICO LESTE	ALE20	0	3	Rio Catu, Alagoinhas	1
48463.8	5	0	ATLANTICO LESTE	ALE21	16.915	13	Drenagens costerias de Salvador	1
110868	5	0	ATLANTICO LESTE	ALE23	33.2702	41	Riacho dos Palmares e riachos da costa sul da Bahia	0
155541	5	0	ATLANTICO LESTE	ALE25	3.36974	14	Rio São Mateus e drenagens costeiras adjacentes	1
145943	6	0	ATLANTICO LESTE	ALE26	10.3206	18	Rio Barra Seca	1
41853	6	0	ATLANTICO LESTE	ALE27	0	61	Rio do Peixe e Rio de Contas	0
60906.2	6	0	ATLANTICO LESTE	ALE29	0	70	Córrego Jundiaí	0
41109.5	6	0	ATLANTICO LESTE	ALE30	1.15441	43	Rio Buranhém	0
176272	4	0	ATLANTICO LESTE	ALE32	41.8999	18	Drenagens costeiras em Valença	0
27524	6	0	ATLANTICO LESTE	ALE33	41.276	53	Afluentes da Margem direita do Barra Seca em Sooretama	0
74968.6	6	0	ATLANTICO LESTE	ALE34	0	19	Rio Pardo e Ribeirão das Palmeiras	1
15546.8	5	0	ATLANTICO LESTE	ALE36	100	77	Ilha de Itaparica	0
18609.4	5	0	ATLANTICO LESTE	ALE38	15.7999	15	Rio do Braço	1
77755.3	4	0	ATLANTICO LESTE	ALE39	13.7108	86	Bacias costeiras em Una, BA	0
10232.7	5	0	ATLANTICO LESTE	ALE40	90.8102	60	Rio Almada	0
42706.1	5	0	ATLANTICO LESTE	ALE42	0.358997	30	Rio Cachoeira	1
30053	6	0	ATLANTICO LESTE	ALE45	0	15	Rio João de Tiba	1
356856	5	0	AMAZONICA	AMA02	21.8482	56	Igarapé Saracá/Araticum	0
139355	4	0	AMAZONICA	AMA03	37.2364	36	Boca do Solimões	0
99653.2	6	0	AMAZONICA	AMA04	95.3318	84	Baixo Rio Unini	0
354775	5	0	AMAZONICA	AMA05	88.2962	93	Rio Cuieiras	0
30053.2	5	0	AMAZONICA	AMA06	23.6479	85	Rio Jauaperi	0
21796.8	6	0	AMAZONICA	AMA07	8.965e-06	30	Boca do Igarapé Tarumã-açu (afluente margem esquerda)	1
46262.1	5	0	AMAZONICA	AMA09	8.38312	37	Rio Tapajos, foz do Igarapé jacaré	0
73512.6	5	0	AMAZONICA	AMA10	1.36259	24	Rio Tapajos, Foz do Igarapé Capituã	1
192713	6	0	AMAZONICA	AMA100	0	99	Bacia do Rio Padauari	0
60237.5	6	0	AMAZONICA	AMA109	0	82	Médio Rio Mucajaí	0
130328	5	0	AMAZONICA	AMA11	45.7642	95	Rio dos Marmelos e Igarapé Camujá	0
104691	6	0	AMAZONICA	AMA112	42.6346	92	Furo Santa Rosa, em Maracá	0
13374.9	5	0	AMAZONICA	AMA113	86.4856	100	Igarapé Repartimento	0
139469	6	0	AMAZONICA	AMA116	99.8832	99	Rio Traíra	0
38169	5	0	AMAZONICA	AMA118	0	60	Rio Flechal, Bacia do Matapi	0
29051.6	5	0	AMAZONICA	AMA119	100	99	Igarapé Grande Crique	0
6859.42	5	0	AMAZONICA	AMA12	0	89	Rio Preto da Eva	0
35679.3	4	0	AMAZONICA	AMA120	100	98	Rio Goiapi, Ilha de Marajó	0
29615.7	4	0	AMAZONICA	AMA121	99.0108	100	Lencóis freáticos na Ilha de Marajó, em frente a Belém	0
31656.3	6	0	AMAZONICA	AMA124	0	4	Bacia do Guaporé em Pontes e Lacerda	1
80440.6	5	0	AMAZONICA	AMA13	0.533288	78	Rio Solimões, foz do Igarapé Jamacanã	0
24259.2	6	0	AMAZONICA	AMA14	0	98	Rio Branco	0
33012.6	5	0	AMAZONICA	AMA15	0	39	Afluente margem direita do Baixo Tapajós	0
42875	5	0	AMAZONICA	AMA16	0	57	Igarapé Treze-de-Maio	0
121953	5	0	AMAZONICA	AMA17	0.00325392	60	Baixo Rio Tefé	0
13587.5	5	0	AMAZONICA	AMA18	16.8256	81	Margem direita do Rio Tapajós	0
106456	5	0	AMAZONICA	AMA19	6.78192	47	Rio Manacapuru	0
49796.9	5	0	AMAZONICA	AMA20	0.747433	47	Rio Coari Grande	0
295978	6	0	AMAZONICA	AMA21	8.88335	94	Rio Içá	0
156566	5	0	AMAZONICA	AMA22	0	98	Igarapé Bararuá	0
89691	5	0	AMAZONICA	AMA23	92.7365	94	Igarapé Axiri	0
23518.6	5	0	AMAZONICA	AMA24	0	54	Rio Iaco	0
297994	6	0	AMAZONICA	AMA25	84.5803	78	Rio Japurá	0
37768.5	6	0	AMAZONICA	AMA26	2.38345	98	Rio Tefé	0
65033	6	0	AMAZONICA	AMA27	0	80	Rio Acre	0
26134.4	6	0	AMAZONICA	AMA29	0	97	Rio Aruã	0
108291	6	0	AMAZONICA	AMA30	0	92	Igarapé Puruzinho	0
284385	4	0	AMAZONICA	AMA31	32.7583	83	Rio Itapacurá	0
65652.7	6	0	AMAZONICA	AMA32	99.7796	99	Igarapé de Belém	0
50625	5	0	AMAZONICA	AMA36	31.493	84	Córrego Suiá-Missu	0
306181	5	0	AMAZONICA	AMA37	99.2847	100	Igarapé Ipixuna	0
23037.5	5	0	AMAZONICA	AMA38	28.9677	99	Alto Xingu, Cachoeira Von Martius	0
72306.2	5	0	AMAZONICA	AMA39	100	100	Rio Batovi	0
41156.4	5	0	AMAZONICA	AMA41	0	94	Ribeirão Capricho	0
25806.2	5	0	AMAZONICA	AMA43	0	20	Rio Fresco	1
34759.4	5	0	AMAZONICA	AMA44	0	99	Alto Culuene	0
30284.4	6	0	AMAZONICA	AMA45	0	100	Corrego Fundo	0
13537.6	6	0	AMAZONICA	AMA47	0	30	Rio Xingu, Belo Monte	1
185448	6	0	AMAZONICA	AMA51	3.97378	99	Igarapé Pardo, Rio Aripuanã	0
49856.4	5	0	AMAZONICA	AMA56	0	79	Rio Apiacá	0
24537.5	5	0	AMAZONICA	AMA57	0	47	Corrego Guajará Mirim	0
75181.6	4	0	AMAZONICA	AMA61	6.81393	94	Rio Guaporé, em Forte Príncipe da Beira	0
14665.7	6	0	AMAZONICA	AMA66	0	66	Corrego Loanda	0
34328	6	0	AMAZONICA	AMA67	0	14	Rio Kaiapo, Bacia do Teles Pires	1
26990.6	6	0	AMAZONICA	AMA69	0	0	Afluente do Rio Peixoto de Azevedo	1
40721.8	6	0	AMAZONICA	AMA70	82.1747	85	Rio Tapajos, no PN Amazonia	0
93980.8	5	0	AMAZONICA	AMA73	0	70	Bacia do Rio Preto, Afluente do Arinos	0
16803.1	6	0	AMAZONICA	AMA77	0	76	Corrego Agua Clara	0
55659.6	6	0	AMAZONICA	AMA78	3.67135	100	Córrego Tabatinga	0
36128.1	5	0	AMAZONICA	AMA84	0	17	Lago Janauacá	1
200988	4	0	AMAZONICA	AMA85	30.0036	49	Rio Amazonas em Monte Alegre	0
21893.8	5	0	AMAZONICA	AMA86	99.7571	98	Igarapé Mulini	0
22981.3	5	0	AMAZONICA	AMA87	73.0976	100	Rio Taparabu	0
213384	4	0	AMAZONICA	AMA88	94.9422	91	Medio Oiapoque	0
23059.7	6	0	AMAZONICA	AMA89	99.9476	92	Rio Tiquié, Cachoeira Comprida	0
19719.1	6	0	AMAZONICA	AMA90	99.9842	92	Rio Tiquié, Cachoeira Caruru	0
257029	5	0	AMAZONICA	AMA91	100	100	Igarapé Iauiari	0
39115.7	5	0	AMAZONICA	AMA92	28.0291	64	Rio Negro em São Gabriel da Cachoeira	0
32109.6	6	0	AMAZONICA	AMA93	100	100	Morro dos Seis Lagos, Pico da Neblina	0
7221.95	6	0	AMAZONICA	AMA94	0	100	excluir	0
10390.5	6	0	AMAZONICA	AMA95	0	100	Rio Curicuriari	0
83591.1	6	0	AMAZONICA	AMA96	99.9437	100	Rio Maraui	0
106284	6	0	AMAZONICA	AMA97	100	99	Rio Cubaté, afluente do Rio Negro	0
35193.8	5	0	AMAZONICA	AMA98	35.328	84	Rio Negro, Lago Penera	0
19780.9	6	0	AMAZONICA	AMA99	100	99	Tributário da margem direita do baixo curso do Uaupés	0
113368	5	0	ATLANTICO NORDESTE OCIDENTAL	ANOC01	87.4795	36	Rio Pindaré na região do Lago Viana, Bacia do Mearim	0
78753.2	5	0	ATLANTICO NORDESTE OCIDENTAL	ANOC02	0	0	Igarapé Inhangapi	1
14387.5	6	0	ATLANTICO NORDESTE OCIDENTAL	ANOC03	0	7	Afluente do Rio Guamá, entre Santa Maria do Pará e São Miguel do Guamá	1
84731.3	5	0	ATLANTICO NORDESTE OCIDENTAL	ANOC04	0	11	Rio Capim	1
28903	6	0	ATLANTICO NORDESTE OCIDENTAL	ANOC05	0	57	Maguari, região de Belém	0
48713.2	6	0	ATLANTICO NORDESTE OCIDENTAL	ANOC06	0	26	Rio Guamá e afluentes, médio curso	1
141425	6	0	ATLANTICO NORDESTE OCIDENTAL	ANOC07	0	31	Rio Acará, Foz	0
193486	6	0	ATLANTICO NORDESTE OCIDENTAL	ANOC08	0.276494	38	Igarapé Repartimento	0
42818.6	5	0	ATLANTICO NORDESTE OCIDENTAL	ANOC09	14.3343	41	Foz do Rio Guamá	0
28434.2	5	0	ATLANTICO NORDESTE OCIDENTAL	ANOC10	0	45	Drenagens costeiras em Primavera, PA	0
45959.5	5	0	ATLANTICO NORDESTE OCIDENTAL	ANOC11	6.1204	15	Rio Caeté, Bragança	1
186278	5	0	ATLANTICO NORDESTE ORIENTAL	ANOR01	44.4851	53	Bacia dos rios Granjeiro e Salgado, Crato	0
5834.36	6	0	ATLANTICO NORDESTE ORIENTAL	ANOR02	0	4	Riacho dos Macacos, Bacia do Acara·	1
133581	4	0	ATLANTICO NORDESTE ORIENTAL	ANOR03	2.59706	69	Cachoeira do Gusmão, Bacia do Acara·	0
45809.3	5	0	ATLANTICO NORDESTE ORIENTAL	ANOR04	0.01494	5	Afluente do Paraíba em Campina Grande	1
104654	5	0	ATLANTICO NORDESTE ORIENTAL	ANOR05	0	58	Rio Salgado, Bacia do Jaguaribe	0
8943.74	6	0	ATLANTICO NORDESTE ORIENTAL	ANOR06	0	73	Medio Rio do Carmo	0
115575	5	0	ATLANTICO NORDESTE ORIENTAL	ANOR07	0	72	Rio Jaguaribe, em Limoeiro do Norte	0
80996.5	6	0	ATLANTICO NORDESTE ORIENTAL	ANOR09	3.25171	52	Riacho Bretão	0
54865.7	5	0	ATLANTICO NORDESTE ORIENTAL	ANOR10	43.1263	14	Lago Papari	0
545077	4	0	ATLANTICO NORDESTE ORIENTAL	ANOR11	5.73739	64	Drenagens costeiras em Fortaleza	0
8112.42	6	0	ATLANTICO NORDESTE ORIENTAL	ANOR12	0	74	Afluentes do Açude de Orós	0
8093.63	6	0	ATLANTICO SUDESTE	ASE03	0	49	Corrego Palmital	0
43625.1	5	0	ATLANTICO SUDESTE	ASE06	1.22522	70	Rio Jucu	0
10200	5	0	ATLANTICO SUDESTE	ASE12	0	96	Foz do Rio Paraíba do Sul	0
58494	5	0	ATLANTICO SUDESTE	ASE43	98.0138	54	Rio São João, em Silva Jardim	0
23103.2	6	0	ATLANTICO SUDESTE	ASE46	1.74254	36	Bacias costeiras na Lagoa de Araruama	0
5487.57	6	0	ATLANTICO SUDESTE	ASE47	0	23	Alto Rio Macaé	1
30934.4	6	0	ATLANTICO SUDESTE	ASE48	4.7753	32	Drenagens e lagoas costeiras em Maricá	0
15871.9	5	0	ATLANTICO SUDESTE	ASE49	28.474	10	Foz do Rio São João	1
23121.9	6	0	ATLANTICO SUDESTE	ASE50	2.53867	15	Drenagem Afluente do Itaboraí, em São Gonçalo e Maricá	1
7796.78	6	0	ATLANTICO SUDESTE	ASE51	0.00715447	27	Bacias costeiras em Cabo Frio	1
22043.6	5	0	ATLANTICO SUDESTE	ASE52	90.7936	21	Bacias costeiras em Silva Jardim	0
6937.63	6	0	ATLANTICO SUDESTE	ASE53	0	31	Afluente do Macacu, Macaé	0
79009.7	5	0	ATLANTICO SUL	ASU02	35.8931	76	Rio Cubatão, Santa Catarina	0
13353.2	6	0	ATLANTICO SUL	ASU14	0	12	Afluentes do Tubarão em Gravatal	1
241807	4	0	ATLANTICO SUL	ASU15	34.6518	0	Arroio Chui	0
83040.6	4	0	ATLANTICO SUL	ASU29	100	87	Arroio do Ribeiro	0
91965.7	5	0	ATLANTICO SUL	ASU30	16.1997	41	Drenagens do Banhado do Taim	0
39003.2	6	0	ATLANTICO SUL	ASU31	0	80	Arroio Arambaré	0
97687.4	5	0	ATLANTICO SUL	ASU33	0	30	Arroio Dom Marcos	1
69979.4	4	0	ATLANTICO SUL	ASU34	0	19	Banhado do Timba	1
17630.9	6	0	ATLANTICO SUL	ASU35	0	45	Afluente do Alto Arroio Minuano	0
167984	4	0	ATLANTICO SUL	ASU37	34.7998	74	Planicies de inundação ao Sul da Lagoa dos Patos	0
25537.6	6	0	ATLANTICO SUL	ASU38	0	87	Alto Arroio Grande, Afluente da Lagoa Mirim	0
17471.8	6	0	ATLANTICO SUL	ASU39	0	13	Rio Jaguarão	1
253008	6	0	ATLANTICO SUL	ASU40	11.7344	54	Drenagens Costeiras a sudeste da Lagoa dos Patos	0
17912.5	6	0	ATLANTICO SUL	ASU41	0	22	Sanga da Areia	1
70331.7	5	0	ATLANTICO SUL	ASU44	0	11	Lagoa da Cerquinha e drenagens adjacentes	1
31505.9	6	0	ATLANTICO SUL	ASU47	29.0716	46	Rio TrÛs Forquilhas	0
7728.18	6	0	ATLANTICO SUL	ASU48	2.29183	40	Rio Jordão Alto	0
18812.5	6	0	ATLANTICO SUL	ASU50	0	5	Poças Temporárias em drenagens entre Crici·ma e Tubarão	1
21193.9	6	0	ATLANTICO SUL	ASU52	0	37	Drenagens costeiras em Osório e Tramandaí	0
20037.4	5	0	ATLANTICO SUL	ASU57	0	14	Afluentes da Lagoa dos Patos em São Lorenço do Sul	1
43478.2	6	0	ATLANTICO SUL	ASU58	0	32	Afluente do Arroio dos Ratos	0
82554.8	5	0	PARNAIBA	PNB01	89.7259	92	Rio Baixão da Volta	0
104947	6	0	PARNAIBA	PNB02	0	55	Corrego Otaviano/Maçal	0
133753	5	0	PARNAIBA	PNB03	32.0328	0	Rio Corrente, PI	0
24316.6	6	0	PARNAIBA	PNB04	93.49	100	Alto Rio Balsas	0
34153	5	0	PARNAIBA	PNB05	0	100	Rio Medonho, bacia do Parnaíba	0
57218.8	5	0	PARNAIBA	PNB06	0.0340172	100	Rio Poty, bacia do Parnaíba	0
45100.1	6	0	PARNAIBA	PNB07	99.787	100	Alto Rio Parnaíba	0
39359.6	5	0	PARNAIBA	PNB08	0	100	Rio das Balsas	0
35187.9	5	0	PARNAIBA	PNB09	55.9541	77	Lagoa Seca, Rio Parnaíba	0
53196.6	6	0	PARAGUAI	PRG02	0	84	Ribeirão Espinheiro	0
136050	6	0	PARAGUAI	PRG04	10.6459	62	Bacia do Rio Formoso, Bonito	0
262410	6	0	PARAGUAI	PRG05	19.5316	57	Bacia do Rio Salobra	0
21590.7	5	0	PARAGUAI	PRG08	0	63	Foz do Rio Jauru	0
190922	5	0	PARAGUAI	PRG09	12.2624	83	Ribeirão da Costa	0
15293.7	6	0	PARAGUAI	PRG10	85.4017	63	Ribeirão Formoso	0
107534	6	0	PARAGUAI	PRG11	1.9708	86	Ribeirão Bento Gomes	0
26178.1	5	0	PARAGUAI	PRG18	0	50	Rio Paraguai em Cáceres	0
76681.2	6	0	PARAGUAI	PRG19	0	98	Rio Bento Gomes	0
202234	6	0	PARAGUAI	PRG20	7.68753	94	Vazante Magabal e Brejo de Santa Sofia	0
57331.3	5	0	PARAGUAI	PRG21	36.2924	76	Rio Cuiabá em Baraão de Melgaço	0
132764	6	0	PARANA	PRN21	3.50252	0	Rio Inhanduí	1
29724.8	6	0	PARANA	PRN26	91.2997	69	Bacia do Rio Jaguariaíva	0
28428	6	0	PARANA	PRN43	6.37822	58	Foz do Rio da Várzea	0
57300	6	0	PARANA	PRN47	0	2	Ribeirão do Corvo	1
25246.8	6	0	PARANA	PRN52	0.437546	39	Riacho Serrinha	0
6990.7	6	0	PARANA	PRN53	0	44	Rio Iguaçu em Balsa Nova	0
29346.8	6	0	S├O FRANCISCO	SFR01	96.7714	84	Bacia do Rio Grande, em Barra	0
11650.1	6	0	S├O FRANCISCO	SFR03	0	2	Rio São Francisco em Juazeiro	1
436606	5	0	S├O FRANCISCO	SFR04	0	53	Riacho do Poção	0
65154.6	5	0	S├O FRANCISCO	SFR05	0	76	Alto Rio das Rãs	0
120847	5	0	S├O FRANCISCO	SFR07	0	77	Rio São Francisco e afluentes, em Lagoa Grande	0
100575	6	0	S├O FRANCISCO	SFR09	0	22	Bacia do Riacho Sapecado, Afluente do Parnamirim	1
58248.4	5	0	S├O FRANCISCO	SFR11	0	24	Bacia do São Domingos, afluente do Rio Verde Pequeno	1
63431.2	5	0	S├O FRANCISCO	SFR13	6.85735	100	Riacho Cabeceira das Lages, Afluente do Rio de Ondas	0
268531	6	0	S├O FRANCISCO	SFR18	25.5593	100	Foz do Rio Preto	0
66865.7	5	0	S├O FRANCISCO	SFR20	98.9833	85	Brejo da Cachoeira e Rio São Francisco, em Barra	0
15509.4	6	0	S├O FRANCISCO	SFR21	0	0	Rio Verde Grande em Montes Claros	1
26818.6	6	0	S├O FRANCISCO	SFR23	0	57	Riacho do PAulista e Rio São Francisco em Paratinga	0
42362.4	5	0	S├O FRANCISCO	SFR24	0	16	Rio São Francisco e afluente da margem esquerda em Bom Jesus da Lapa	1
29115.8	5	0	S├O FRANCISCO	SFR25	0	40	Rio São Francisco em Sítio do Mato	0
93081.3	5	0	S├O FRANCISCO	SFR26	0	45	Rio São Francisco, na foz do Rio das Rãs	0
42190.6	5	0	S├O FRANCISCO	SFR27	97.9451	85	Rio São Francisco, em Barra	0
59165.6	6	0	S├O FRANCISCO	SFR29	0	73	Rio Tabocas	0
47268.7	5	0	S├O FRANCISCO	SFR32	0	100	Vereda da Canoa e afluentes do São Francisco em Igarité	0
26278	6	0	S├O FRANCISCO	SFR33	0	0	Rio Gorotuba	1
17765.6	5	0	S├O FRANCISCO	SFR36	0	44	Afluentes e margem direita do São Francisco, em São Francisco	0
14115.6	6	0	S├O FRANCISCO	SFR41	27.7109	28	Rio do Peixe, Serra da Canastra	1
57166	5	0	TOCANTINS-ARAGUAIA	TOAR01	0	46	Rio Crixás	0
101996	4	0	TOCANTINS-ARAGUAIA	TOAR02	0	100	Rio Suaizinho, Bacia do Xingu	0
27053.7	5	0	TOCANTINS-ARAGUAIA	TOAR03	84.8597	5	Ribeirão do Sapo	0
48537.4	5	0	TOCANTINS-ARAGUAIA	TOAR06	53.7069	59	Rio Tocantins, Jatobal	1
22265.1	5	0	TOCANTINS-ARAGUAIA	TOAR07	0	62	Rio Tapirapé, Serra do Roncador	0
110094	4	0	TOCANTINS-ARAGUAIA	TOAR12	92.7909	90	Rio Araguaia em Luis Alves	0
34321.9	5	0	TOCANTINS-ARAGUAIA	TOAR13	0.344684	0	Baixo Rio Vermelho	1
37878	4	0	TOCANTINS-ARAGUAIA	TOAR15	0.0110951	1	Ribeirão São Domingos	1
38347.5	4	0	TOCANTINS-ARAGUAIA	TOAR20	0	0	Ribeirão dos Perdidos, Rio das Mortes	1
58915.6	6	0	TOCANTINS-ARAGUAIA	TOAR21	0	64	Ribeirão Macambira	0
20859.5	6	0	TOCANTINS-ARAGUAIA	TOAR22	0	100	Ribeirão Macambira/Rio da Prata	0
24628.1	5	0	TOCANTINS-ARAGUAIA	TOAR23	0.0099236	79	Corrego Mosquito	0
5665.55	5	0	TOCANTINS-ARAGUAIA	TOAR25	0	0	Rio Corrente	1
97066.2	4	0	TOCANTINS-ARAGUAIA	TOAR27	0	17	Corrego Xavante	1
20409.4	6	0	TOCANTINS-ARAGUAIA	TOAR28	100	100	Alto Manoel Alves Pequeno	0
11274.9	5	0	TOCANTINS-ARAGUAIA	TOAR30	0	52	Rio Pindaíba, bacia do Rio das Mortes	0
10118.7	6	0	TOCANTINS-ARAGUAIA	TOAR31	9.80298	100	Afluente margem direita do Rio Boracaia, Bacia do Rio das Mortes	0
102122	5	0	TOCANTINS-ARAGUAIA	TOAR32	38.8289	66	Rio São Vicente	0
115256	6	0	TOCANTINS-ARAGUAIA	TOAR33	53.8997	85	Rio São Mateus, BAcia do Rio Paranan	0
143825	4	0	TOCANTINS-ARAGUAIA	TOAR34	0	9	Corrego Jabuti, afluente margem esquerda do Araguaia	1
18640.7	4	0	TOCANTINS-ARAGUAIA	TOAR35	0	7	Rio Araguaia em Araguaiana	1
82268.8	4	0	TOCANTINS-ARAGUAIA	TOAR37	0	21	Ribeirão Insula	1
43006.3	5	0	TOCANTINS-ARAGUAIA	TOAR39	1.80513	9	Ribeirão Pinguela	1
28030.1	5	0	TOCANTINS-ARAGUAIA	TOAR41	42.6157	70	Corrego Boiadeiro/Córrego Gordura	0
97725.1	5	0	TOCANTINS-ARAGUAIA	TOAR43	0	16	Corrego Agua Parada e Bacia do Pintado	1
150682	5	0	TOCANTINS-ARAGUAIA	TOAR44	0	100	Rio Vermelho em Matrinchã	0
10940.8	6	0	TOCANTINS-ARAGUAIA	TOAR45	100	99	Corrego das Dores, Bacia do Tocantins	0
25196.8	6	0	TOCANTINS-ARAGUAIA	TOAR48	0	35	Rio Canabrava	0
121225	4	0	TOCANTINS-ARAGUAIA	TOAR50	51.8576	100	Rio das Mortes, entre Agua Boa e Cocalinho	0
254535	4	0	TOCANTINS-ARAGUAIA	TOAR52	0	56	Rio Formoso, bacia do Javaés	0
37531.3	6	0	TOCANTINS-ARAGUAIA	TOAR58	0	70	Afluente do Rio Santa Maria, Alvorada do Norte	0
116541	4	0	TOCANTINS-ARAGUAIA	TOAR59	0	100	Rio Formoso e Rio Morto	0
23402.4	6	0	TOCANTINS-ARAGUAIA	TOAR60	64.7097	76	Corrego do Rancho e Ribeirão Guariroba	0
71124.4	5	0	TOCANTINS-ARAGUAIA	TOAR61	0	45	Foz do Rio Tocantins	0
18018.6	4	0	TOCANTINS-ARAGUAIA	TOAR65	13.0785	100	Rio Bacuri, afluente do Tocantins em Tucurui	0
622528	4	0	TOCANTINS-ARAGUAIA	TOAR66	90.4775	83	Rio Tocantins e afluentes, na Ilha do Jatobal	0
140309	4	0	TOCANTINS-ARAGUAIA	TOAR68	0	38	Rio Tocantins em Itupiranga	0
23945.2	5	0	URUGUAI	URU04	18.8951	34	Bacia do Alto Canoas, em Urubici	0
163587	6	0	URUGUAI	URU07	0	34	Rio Negro em Bagé	0
63189.2	6	0	URUGUAI	URU17	7.21839	5	Rio Passo Fundo	1
362339	4	0	URUGUAI	URU26	0	53	Rio Santa MAria, em Cacequi	0
88868.9	5	0	URUGUAI	URU29	0.111735	49	Rio Santa Maria em Dom Pedrito	0
